# Supplementary material for: Transcriptome analysis and annotation: SNPs identified from single copy annotated unigenes of three polyploid blueberry crops
Source: PLoS One. 2019 Apr 29;14(4):e0216299. doi: 10.1371/journal.pone.0216299 (PMC6488077; doi:10.1371/journal.pone.0216299)
Supplement: S1 Table — (XLSX) [file pone.0216299.s001.xlsx]

## Sheet: Sheet1
Table S1. Raw reads statistics of transcriptome in three blueberry crops
Code	Cultivar name	Code	Total reads	Clean reads	Ratio of clean reads/total reads
T1	Rabbiteye blueberry	Vaccinium ashei	248263490	246841106	0.9943
1	Bluebell	V.asch01	13279912	13219384	0.9954
2	Vernon	V.asch02	24929518	24749534	0.9928
3	Premier	V.asch03	9008582	8968226	0.9955
4	Baldwin	V.asch04	19998638	19888084	0.9945
5	Onslow	V.asch05	8714594	8660560	0.9938
6	Homebell	V.asch06	11487468	11431822	0.9952
7	Tifblue	V.asch07	14707356	14594462	0.9923
8	Summit	V.asch08	13458168	13385674	0.9946
9	Redprarl	V.asch10	14662846	14605906	0.9961
10	Gardenblue	V.asch11	13862292	13804630	0.9958
11	Brightwell	V.asch12	10947530	10873566	0.9932
12	Bluebelle	V.asch13	7759090	7696468	0.9919
13	Powderblue	V.asch14	10227066	10153350	0.9928
14	Woodard	V.asch15	19292100	19143056	0.9923
15	Delite	V.asch09	10765512	10696632	0.993
16	Choice	V.asch16	8345694	8294398	0.9939
17	Climax	V.asch17	12009122	11965936	0.9964
18	Beckyblue	V.asch18	8078600	8046212	0.996
19	Bonita	V.asch19	16729402	16663206	0.996
T2	Southern highbush blueberry	Vaccinium darrowii	139284150	138467198	0.9941
20	Sharpblue	V.darr01	9261264	9193920	0.9927
21	Bluegood	V.darr02	8615264	8557968	0.9933
22	Wooper	V.darr03	15841022	15731508	0.9931
23	Bluerain	V.darr04	10345896	10252140	0.9909
24	Biloxi	V.darr05	12974932	12931912	0.9967
25	Misty	V.darr06	7849088	7790968	0.9926
26	O′Neal	V.darr07	10100638	10012576	0.9913
27	Georgiagem	V.darr08	12267908	12208156	0.9951
28	Gulfcosat	V.darr09	9774866	9699274	0.9923
29	Bluegold	V.darr10	12051156	12014836	0.997
30	Subaru	V.darr11	12092736	12045906	0.9961
31	Bluebig	V.darr12	8735834	8702696	0.9961
32	Pearl river	V.darr13	9373546	9325338	0.9949
T3	Northern highbush blueberry	Vaccinium corymbosum	288809422	286888158	0.9933
33	Weymouth	V.cory14	12248572	12147080	0.9917
34	Sierra	V.cory15	10956434	10854186	0.9907
35	Cara´s choice	V.cory16	51065074	50593080	0.9908
36	Herberd	V.cory17	10625016	10571468	0.995
37	Blue haven	V.cory18	14526340	14455792	0.9951
38	Bluetta	V.cory19	9312544	9251928	0.9935
39	Legacy	V.cory20	12518408	12471184	0.9962
40	Brigitta	V.cory21	13248354	13181360	0.9949
41	Big-bluegold	V.cory22	14772844	14724842	0.9968
42	Collins	V.cory23	8618282	8548892	0.9919
43	Blueray	V.cory24	7780398	7739726	0.9948
44	Blue south	V.cory25	8701240	8669938	0.9964
45	Jersey	V.cory26	12476824	12373740	0.9917
46	Puru	V.cory27	17034050	16944384	0.9947
47	Unrise	V.cory28	11004058	10901628	0.9907
48	Olympic	V.cory29	10039200	9985548	0.9947
49	Earliblur	V.cory30	14644368	14566178	0.9947
50	Chandler	V.cory31	10511846	10420270	0.9913
51	Darrow	V.cory32	10203984	10109492	0.9907
52	Patrior	V.cory33	9802266	9748358	0.9945
53	Duke	V.cory34	10318400	10265494	0.9949
54	Reka	V.cory35	8400920	8363590	0.9956
