# Supplementary material for: Transcriptome analysis and annotation: SNPs identified from single copy annotated unigenes of three polyploid blueberry crops
Source: PLoS One. 2019 Apr 29;14(4):e0216299. doi: 10.1371/journal.pone.0216299 (PMC6488077; doi:10.1371/journal.pone.0216299)
Supplement: S8 Table — (XLSX) [file pone.0216299.s008.xlsx]

## Sheet: Table S4
Table S8. SNPs loci identified from leaf transcriptome of three blueberry crops

## Sheet: rabbiteye blueberry
SNPs loci identified from leaf transcriptome of rabbiteye blueberry
#chr	start	end	ref	mut	variation_type	database	quality	V.asch01_type	V.asch02_type	V.asch03_type	V.asch04_type	V.asch05_type	V.asch06_type	V.asch07_type	V.asch08_type	V.asch09_type	V.asch10_type	V.asch11_type	V.asch12_type	V.asch13_type	V.asch14_type	V.asch15_type	V.asch16_type	V.asch17_type	V.asch18_type	V.asch19_type	V.asch01_read	V.asch02_read	V.asch03_read	V.asch04_read	V.asch05_read	V.asch06_read	V.asch07_read	V.asch08_read	V.asch09_read	V.asch10_read	V.asch11_read	V.asch12_read	V.asch13_read	V.asch14_read	V.asch15_read	V.asch16_read	V.asch17_read	V.asch18_read	V.asch19_read
Unigene0000008	787	787	A	C	SNP	.	15271.6	1|1	0|1	0|1	1|1	1|1	1|1	0|1	1|1	1|1	0|1	0|1	1|1	0|1	0|1	0|1	1|1	0|1	0|1	0|1	0,53	5,15	7,22	0,50	0,13	0,22	12,15	0,23	0,20	5,4	17,23	0,24	8,18	29,40	16,10	0,9	17,18	5,5	9,16
Unigene0000013	236	236	G	T	SNP	.	20567.5	1|1	0|1	0|1	0|1	0|1	0|1	0|1	1|1	1|1	1|1	1|1	0|1	1|1	0|1	0|1	0|1	0|1	0|0	0|1	0,56	31,74	10,10	244149	2,7	39,65	6,11	0,2	0,11	0,16	0,19	4,8	0,17	166,64	141,59	20,30	39,22	2,0	39,12
Unigene0000018	1298	1298	G	A	SNP	.	28101.5	1|1	0|0	1|1	1|1	0|0	0|1	1|1	0|0	0|0	0|1	1|1	0|0	1|1	0|1	0|0	1|1	0|0	0|1	0|1	0,151	367,5	0,3	0,97	96,1	58,6	0,179	88,5	224,1	192,23	0,107	77,2	0,3	98,95	30,2	0,70	69,4	60,8	130,14
Unigene0000018	1554	1554	A	G	SNP	.	1743.31	1|1	0|1	0|1	0|1	0|1	0|0	1|1	1|1	0|1	0|1	0|1	0|1	.|.	0|1	1|1	1|1	1|1	1|1	1|1	0,2	5,1	4,1	2,5	1,3	1,0	0,3	0,3	3,8	1,2	1,1	2,1	.,.	2,4	.	0,1	0,4	0,1	0,7
Unigene0000019	50	50	A	G	SNP	.	5471.45	0|1	0|1	0|0	0|1	0|1	0|1	1|1	0|0	1|1	0|0	0|1	0|1	1|1	0|1	.|.	1|1	1|1	1|1	1|1	3,8	9,4	2,0	6,15	2,6	7,15	0,6	5,0	2,20	1,0	1,3	1,1	0,3	9,13	.,.	0,1	0,15	0,3	0,34
Unigene0000019	3871	3871	C	G	SNP	.	11027.8	1|1	0|1	0|1	0|1	0|1	0|1	1|1	1|1	1|1	1|1	0|1	0|1	0|1	1|1	1|1	1|1	1|1	1|1	1|1	0,33	6,12	6,3	3,21	4,19	5,28	0,6	0,7	0,35	1,5	6,18	1,5	2,7	0,28	0,2	0,4	0,25	0,7	0,28
Unigene0000019	3898	3898	A	G	SNP	.	10540.2	1|1	0|1	0|1	1|1	0|1	0|1	1|1	1|1	1|1	1|1	0|1	1|1	0|1	1|1	1|1	1|1	1|1	1|1	1|1	0,29	5,15	4,3	1,19	4,20	5,23	0,4	0,6	0,32	0,4	6,18	0,8	1,10	0,29	0,2	0,2	0,24	0,7	0,26
Unigene0000020	223	223	G	T	SNP	.	17716.3	1|1	0|1	1|1	1|1	1|1	0|1	0|1	.|.	0|1	0|1	0|1	1|1	0|1	1|1	0|1	0|1	0|1	0|1	0|1	8163	144,22	0,11	0,8	0,4	3,25	9,57	.,.	16,30	208,46	41,11	0,3	2,3	0,9	23,20	13,7	15,29	32,41	121,69
Unigene0000023	3602	3602	A	C	SNP	.	2693.71	1|1	1|1	0|1	1|1	0|1	1|1	0|1	0|1	0|1	0|1	0|1	1|1	0|1	0|1	1|1	0|1	0|1	0|1	0|1	0,10	0,4	2,4	0,6	1,1	0,7	5,4	1,6	2,7	1,1	5,1	0,3	4,1	1,10	0,2	5,2	3,2	1,2	2,3
Unigene0000033	74	74	A	G	SNP	.	5722.75	0|1	0|1	1|1	0|1	1|1	0|1	0|1	0|1	0|1	1|1	0|1	1|1	0|1	1|1	0|1	1|1	0|0	0|0	0|0	11,7	1,1	0,4	4,16	0,10	2,8	1,12	3,11	4,7	1,9	4,5	1,19	2,5	2,27	1,3	0,10	5,0	1,0	5,0
Unigene0000044	341	341	T	C	SNP	.	13108	0|1	1|1	1|1	1|1	1|1	1|1	0|1	0|1	0|1	1|1	0|1	0|1	1|1	0|1	1|1	0|1	0|1	1|1	0|1	3,10	0,28	0,15	0,42	1,23	0,14	10,39	14,2	12,26	0,17	1,9	2,10	0,16	8,15	1,31	4,12	2,9	0,16	2,25
Unigene0000044	500	500	A	G	SNP	.	6498.05	1|1	1|1	1|1	1|1	1|1	0|1	1|1	0|1	0|1	0|1	0|1	1|1	1|1	0|1	0|1	1|1	1|1	1|1	1|1	0,6	2,18	0,6	0,19	0,4	1,2	0,15	6,3	2,21	9,23	1,1	0,5	0,11	2,8	2,3	0,5	0,1	0,9	0,18
Unigene0000044	521	521	A	G	SNP	.	9058.05	0|1	1|1	0|1	1|1	1|1	1|1	1|1	0|1	0|1	0|1	0|1	1|1	0|1	1|1	0|1	1|1	0|1	0|1	1|1	2,8	2,24	1,9	0,31	0,9	0,14	0,20	10,4	10,19	12,32	1,3	0,10	7,10	0,19	2,3	0,8	1,2	4,5	0,25
Unigene0000052	24	24	A	C	SNP	.	553.65	1|1	1|1	1|1	0|0	.|.	0|1	.|.	.|.	0|0	1|1	1|1	.|.	0|0	.|.	0|0	1|1	.|.	0|0	1|1	0,1	0,4	0,1	3,0	.,.	1,2	.,.	.,.	1,0	0,1	0,3	.,.	2,0	.,.	1,0	0,1	.,.	1,0	0,3
Unigene0000052	424	424	C	T	SNP	.	10601.5	1|1	0|1	0|1	1|1	0|1	0|1	0|1	1|1	1|1	1|1	0|1	0|1	1|1	1|1	1|1	0|1	1|1	1|1	1|1	0,15	9,10	10,4	0,22	5,4	2,9	5,12	0,23	0,12	0,15	7,18	3,5	0,22	0,18	0,21	7,11	0,33	0,5	0,33
Unigene0000052	1494	1494	C	A	SNP	.	668.65	.|.	0|1	0|0	1|1	0|0	1|1	0|1	.|.	1|1	.|.	0|0	0|1	1|1	1|1	.|.	0|0	.|.	.|.	1|1	.,.	6,1	5,0	0,7	4,0	0,1	10,1	.,.	0,1	.,.	5,0	3,1	0,2	0,3	.,.	2,0	.,.	.,.	0,1
Unigene0000052	1495	1495	C	G	SNP	.	668.65	.|.	0|1	0|0	1|1	0|0	1|1	0|1	.|.	1|1	.|.	0|0	0|1	1|1	1|1	.|.	0|0	.|.	.|.	1|1	.,.	6,1	5,0	0,7	4,0	0,1	10,1	.,.	0,1	.,.	5,0	3,1	0,1	0,3	.,.	2,0	.,.	.,.	0,1
Unigene0000057	217	217	A	G	SNP	.	633.38	.|.	1|1	.|.	1|1	.|.	.|.	1|1	0|0	1|1	.|.	.|.	.|.	.|.	1|1	1|1	1|1	0|1	.|.	1|1	.,.	0,1	.,.	0,1	.,.	.,.	0,4	4,0	0,1	.,.	.,.	.,.	.,.	0,2	0,2	0,3	1,1	.,.	0,1
Unigene0000057	255	255	C	A	SNP	.	404.05	1|1	.|.	.|.	0|0	.|.	0|0	0|1	1|1	0|0	.|.	.|.	.|.	1|1	0|1	1|1	0|1	1|1	.|.	1|1	0,1	.,.	.,.	3,0	.,.	2,0	4,1	0,1	4,0	.,.	.,.	.,.	0,2	2,1	0,2	1,1	0,2	.,.	0,1
Unigene0000057	1613	1613	A	C	SNP	.	2100.54	0|1	0|1	0|0	0|1	0|0	1|1	0|1	0|0	0|1	1|1	1|1	0|0	1|1	1|1	1|1	0|1	0|1	1|1	.|.	2,2	4,4	3,0	2,3	4,0	0,6	7,1	4,0	3,3	0,7	0,4	3,0	0,5	0,6	0,6	1,2	1,4	0,4	.,.
Unigene0000058	147	147	G	T	SNP	.	11814.1	1|1	0|1	1|1	1|1	0|1	1|1	1|1	1|1	0|1	1|1	1|1	0|1	1|1	0|1	0|1	0|1	1|1	1|1	1|1	0,19	5,20	0,10	0,28	2,13	0,19	0,32	0,34	6,15	1,23	0,9	5,5	0,7	10,23	2,17	3,8	0,23	0,4	0,22
Unigene0000058	168	168	T	A	SNP	.	7500.66	1|1	0|1	1|1	1|1	0|1	1|1	1|1	1|1	0|1	0|1	0|1	0|1	0|1	0|1	0|1	0|1	0|1	1|1	0|1	0,17	4,17	0,6	0,17	1,8	0,16	0,18	0,35	8,12	13,11	4,2	4,5	5,1	6,18	12,4	3,3	7,15	0,5	5,6
Unigene0000062	500	500	C	G	SNP	.	646.41	1|1	0|0	0|0	.|.	0|1	0|0	0|0	1|1	.|.	1|1	.|.	0|0	1|1	1|1	0|0	0|0	1|1	0|1	.|.	0,1	38,0	11,0	.,.	6,2	19,0	2,0	0,3	.,.	0,2	.,.	7,0	0,6	0,3	1,0	2,0	0,1	3,1	.,.
Unigene0000062	600	600	C	T	SNP	.	4029.86	0|1	1|1	1|1	1|1	1|1	1|1	0|1	0|1	1|1	1|1	.|.	1|1	1|1	0|1	1|1	0|1	0|1	1|1	0|1	1,13	0,24	0,8	0,5	0,7	0,10	3,4	2,3	0,5	0,2	.,.	0,1	0,10	2,4	0,1	1,1	2,4	0,5	2,2
Unigene0000064	563	563	C	G	SNP	.	20382.2	0|1	0|1	0|1	1|1	0|1	1|1	0|1	0|1	1|1	1|1	1|1	0|1	0|1	1|1	1|1	0|1	1|1	1|1	1|1	14,8	32,55	2,3	1,51	12,19	0,45	17,41	16,18	0,36	0,53	0,20	5,7	7,37	0,24	0,41	9,10	0,13	0,29	0,35
Unigene0000064	686	686	G	C	SNP	.	2602.63	1|1	0|1	0|1	1|1	0|1	1|1	0|0	1|1	0|1	.|.	1|1	0|1	0|1	1|1	1|1	0|0	.|.	.|.	.|.	0,9	45,6	2,1	0,4	12,2	0,3	26,1	0,37	1,2	.,.	0,1	5,1	10,3	0,3	0,3	11,0	.,.	.,.	.,.
Unigene0000064	809	809	G	C	SNP	.	9584.62	1|1	0|1	0|1	1|1	0|1	1|1	0|1	1|1	1|1	0|1	0|1	0|1	0|1	0|1	1|1	0|1	1|1	1|1	1|1	0,19	36,14	2,4	0,22	9,6	0,25	27,14	0,37	0,3	23,13	5,19	4,3	9,4	2,11	1,14	8,6	0,7	0,6	0,23
Unigene0000066	310	310	T	A	SNP	.	8058.99	.|.	1|1	0|0	0|1	0|0	1|1	0|0	.|.	0|1	1|1	1|1	0|0	0|1	.|.	0|1	1|1	0|1	1|1	1|1	.,.	0,26	25,0	64,6	58,1	0,7	71,0	.,.	11,17	0,15	0,11	36,0	43,30	.,.	34,30	0,16	1,4	0,31	0,22
Unigene0000066	385	385	A	G	SNP	.	24819.2	.|.	0|1	1|1	1|1	0|1	1|1	1|1	.|.	0|1	1|1	0|1	0|1	0|1	0|1	0|1	1|1	1|1	0|1	1|1	.,.	30,83	0,28	0,76	12,59	0,19	0,72	.,.	9,31	0,15	19,29	7,31	31,49	48,34	10,60	0,23	1,10	14,25	0,41
Unigene0000066	689	689	-	T	Insertion	.	5000.29	0|1	0|1	1|1	1|1	1|1	1|1	1|1	0|1	1|1	1|1	0|1	1|1	0|1	0|1	0|1	0|0	0|0	0|0	0|1	3,8	7,1	0,8	0,22	0,5	0,22	0,1	1,2	0,7	0,3	6,39	0,16	2,2	13,14	8,1	1,0	1,0	1,0	5,3
Unigene0000070	213	213	C	T	SNP	.	13603.4	1|1	1|1	1|1	0|1	0|1	1|1	0|1	1|1	0|1	1|1	1|1	0|1	1|1	0|1	1|1	0|1	1|1	1|1	1|1	1,21	0,26	0,12	100,46	13,4	0,17	47,11	0,20	24,13	0,18	0,16	13,2	0,34	53,47	0,23	27,8	0,16	0,18	0,17
Unigene0000076	30	30	C	T	SNP	.	753.26	0|1	1|1	1|1	1|1	0|0	1|1	0|0	.|.	0|1	.|.	.|.	.|.	1|1	0|0	1|1	0|0	0|1	1|1	0|1	4,1	0,2	0,1	0,4	3,0	0,1	1,0	.,.	1,4	.,.	.,.	.,.	0,2	1,0	0,3	1,0	1,2	0,1	3,1
Unigene0000076	245	245	A	G	SNP	.	2257.5	0|0	0|1	1|1	0|1	0|1	.|.	1|1	1|1	0|1	.|.	1|1	1|1	0|0	0|1	0|1	0|1	0|1	0|0	1|1	2,0	3,9	0,2	1,7	1,11	.,.	0,10	0,1	1,3	.,.	0,2	0,1	2,0	6,14	1,1	1,3	1,4	2,0	0,2
Unigene0000076	363	363	C	T	SNP	.	952.94	.|.	1|1	1|1	0|1	0|1	1|1	0|0	.|.	.|.	1|1	0|0	1|1	.|.	0|1	1|1	0|0	1|1	.|.	.|.	.,.	0,4	0,2	2,4	2,6	0,2	5,0	.,.	.,.	0,3	2,0	0,1	.,.	13,4	0,1	3,0	0,1	.,.	.,.
Unigene0000083	641	641	G	C	SNP	.	4290.17	1|1	0|1	0|1	0|1	0|1	1|1	0|1	1|1	0|1	1|1	0|1	1|1	1|1	0|1	1|1	0|1	1|1	0|1	1|1	0,10	5,5	5,7	5,5	4,6	0,6	10,6	0,7	1,2	0,9	2,7	0,8	0,4	10,13	0,6	3,3	0,6	2,2	0,5
Unigene0000083	706	706	G	T	SNP	.	5089	1|1	1|1	0|1	0|1	0|1	1|1	0|1	1|1	1|1	1|1	1|1	0|1	1|1	0|1	1|1	1|1	1|1	0|1	1|1	0,6	0,13	2,7	5,6	1,7	0,7	9,8	0,3	0,3	0,8	0,15	1,4	0,3	6,11	0,7	1,5	0,9	1,2	0,6
Unigene0000093	41	41	T	C	SNP	.	2515.71	.|.	0|1	0|1	1|1	1|1	0|0	1|1	.|.	0|0	.|.	0|1	1|1	.|.	1|1	0|0	1|1	0|0	0|0	0|0	.,.	3,12	4,4	0,5	0,4	3,0	0,11	.,.	11,0	.,.	5,2	0,7	.,.	0,4	3,0	0,8	28,0	3,0	40,0
Unigene0000093	42	42	-	T	Insertion	.	2506.66	.|.	0|1	0|1	1|1	1|1	0|0	1|1	.|.	0|0	.|.	0|1	1|1	.|.	1|1	0|0	1|1	0|0	0|0	0|0	.,.	3,12	4,4	0,5	0,4	3,0	0,11	.,.	11,0	.,.	5,2	0,7	.,.	0,4	3,0	0,8	28,0	3,0	40,0
Unigene0000093	257	257	T	C	SNP	.	18982.1	1|1	1|1	0|1	0|1	0|1	1|1	0|1	1|1	0|1	1|1	0|1	0|1	1|1	0|1	0|1	0|1	0|1	1|1	0|1	0,31	0,48	11,12	72,23	8,24	0,26	25,13	0,33	20,43	0,18	8,18	2,16	0,45	37,30	5,13	11,17	17,36	0,18	12,52
Unigene0000100	173	173	A	G	SNP	.	1685.31	0|1	1|1	0|1	0|1	1|1	0|1	0|1	.|.	0|1	0|1	1|1	1|1	1|1	1|1	1|1	0|1	0|1	1|1	.|.	8,2	0,6	1,7	4,1	0,4	2,3	3,1	.,.	6,1	5,1	0,2	0,3	0,3	0,3	0,6	1,4	2,4	0,1	.,.
Unigene0000106	42	42	T	C	SNP	.	734.1	.|.	0|1	0|1	.|.	0|1	.|.	0|0	1|1	0|1	1|1	1|1	1|1	0|0	0|0	1|1	1|1	.|.	0|0	0|0	.,.	1,1	1,2	.,.	1,1	.,.	1,0	0,2	1,5	0,1	0,1	0,5	8,0	1,0	0,1	0,1	.,.	2,0	1,0
Unigene0000106	926	926	A	G	SNP	.	8131.17	1|1	0|1	0|1	1|1	0|1	.|.	0|1	1|1	0|1	0|1	0|1	0|1	1|1	0|1	1|1	1|1	1|1	1|1	0|1	0,4	8,18	11,11	0,3	8,8	.,.	3,5	0,44	9,42	4,14	7,8	9,4	0,13	1,3	0,6	0,4	0,2	0,7	2,5
Unigene0000107	1804	1804	G	A	SNP	.	1293.61	0|1	0|1	0|1	1|1	0|1	0|0	0|0	1|1	.|.	0|0	1|1	0|1	0|1	1|1	.|.	1|1	0|1	1|1	1|1	3,3	20,6	7,2	0,3	2,2	8,0	8,0	0,1	.,.	3,0	0,1	1,2	2,6	0,5	.,.	0,3	2,2	0,1	0,3
Unigene0000107	2617	2617	A	G	SNP	.	2522.01	0|1	0|1	1|1	0|0	0|1	1|1	0|1	0|0	1|1	1|1	0|0	1|1	0|1	0|1	.|.	1|1	0|1	0|1	1|1	8,3	6,21	0,8	5,0	3,8	0,6	3,5	8,0	0,1	0,4	2,0	0,6	1,2	3,1	.,.	0,1	4,2	5,5	0,2
Unigene0000111	199	199	C	T	SNP	.	7289.4	0|1	1|1	0|1	1|1	0|1	1|1	0|1	0|1	1|1	1|1	0|1	0|1	1|1	0|1	1|1	1|1	0|1	0|1	0|1	8,10	3,25	2,6	1,14	4,10	1,6	5,12	10,18	0,22	0,1	7,10	1,11	0,22	10,10	0,1	0,4	2,14	2,2	1,7
Unigene0000118	1017	1017	A	G	SNP	.	3248.53	1|1	0|1	0|1	1|1	1|1	1|1	1|1	1|1	0|1	0|1	1|1	1|1	0|1	0|1	1|1	.|.	0|1	1|1	0|1	0,1	1,5	2,3	0,11	0,3	0,9	0,1	0,2	3,1	1,6	0,5	0,5	2,1	1,11	0,7	.,.	2,4	0,3	3,4
Unigene0000118	1024	1024	C	T	SNP	.	3887.67	1|1	0|1	1|1	1|1	1|1	1|1	1|1	1|1	0|0	0|1	1|1	1|1	0|1	0|1	1|1	.|.	0|1	1|1	0|1	0,1	1,5	0,5	0,14	0,3	0,10	0,5	0,2	3,0	1,7	0,5	0,4	2,1	1,12	0,6	.,.	2,4	0,4	3,3
Unigene0000127	448	448	T	-	Deletion	.	4859.13	1|1	0|1	1|1	0|1	1|1	1|1	0|1	1|1	0|1	1|1	1|1	1|1	1|1	0|1	1|1	1|1	0|1	1|1	0|1	0,12	9,7	0,10	5,9	0,5	0,15	4,8	0,3	6,6	0,3	0,6	0,11	0,1	5,10	0,10	0,13	5,8	0,4	2,5
Unigene0000127	1478	1478	A	G	SNP	.	1471	1|1	0|1	0|1	0|1	0|1	1|1	0|1	1|1	1|1	0|0	0|1	0|0	1|1	1|1	.|.	0|1	0|0	.|.	1|1	0,2	1,5	1,3	3,6	1,2	0,3	1,2	0,1	0,3	3,0	2,5	1,0	0,1	0,5	.,.	1,1	1,0	.,.	0,1
Unigene0000127	1499	1499	A	T	SNP	.	953.09	0|0	0|1	1|1	0|1	1|1	0|0	1|1	0|0	0|0	1|1	0|1	1|1	1|1	0|1	.|.	1|1	0|0	0|1	0|0	2,0	4,1	0,3	6,4	0,1	3,0	0,2	1,0	2,0	0,2	2,4	0,1	0,1	4,4	.,.	0,2	1,0	1,1	2,0
Unigene0000143	1262	1262	G	C	SNP	.	14870.1	1|1	0|1	1|1	1|1	0|1	1|1	1|1	0|1	0|1	0|1	0|1	0|1	0|1	0|1	1|1	1|1	0|1	0|1	0|1	0,25	9,49	0,9	0,26	5,12	0,19	0,43	12,17	11,27	32,18	10,29	3,15	14,12	9,13	0,12	0,23	6,15	14,14	14,19
Unigene0000143	1401	1401	A	T	SNP	.	330.55	.|.	0|0	.|.	1|1	1|1	.|.	1|1	.|.	1|1	.|.	.|.	1|1	1|1	0|0	.|.	0|0	.|.	1|1	1|1	.,.	2,0	.,.	0,1	0,1	.,.	0,1	.,.	0,1	.,.	.,.	0,1	0,1	1,0	.,.	2,0	.,.	0,2	0,1
Unigene0000145	469	469	G	A	SNP	.	16523	0|1	0|1	1|1	0|1	0|1	1|1	1|1	1|1	0|1	1|1	0|1	0|1	1|1	0|1	0|1	1|1	0|1	0|0	0|1	27,34	13,39	0,9	68,82	6,5	0,49	1,11	0,4	6,13	0,1	9,11	14,10	0,11	64,62	58,31	0,2	19,47	1,0	35,86
Unigene0000145	665	665	C	G	SNP	.	5336.51	1|1	0|1	1|1	0|1	1|1	1|1	.|.	1|1	1|1	1|1	1|1	0|1	1|1	0|1	0|1	0|0	1|1	1|1	1|1	0,7	2,3	0,1	25,33	0,5	0,2	.,.	0,5	0,4	0,2	0,3	3,5	0,2	34,21	5,3	1,0	0,24	0,1	0,25
Unigene0000145	679	679	A	G	SNP	.	3433.12	1|1	0|1	1|1	0|1	1|1	.|.	.|.	1|1	1|1	1|1	1|1	0|1	.|.	0|1	0|1	0|0	1|1	.|.	1|1	0,4	2,0	0,1	27,25	0,2	.,.	.,.	0,2	0,2	0,2	0,2	3,1	.,.	33,16	5,1	1,0	0,18	.,.	0,20
Unigene0000151	621	621	C	T	SNP	.	4984.91	0|1	0|1	1|1	0|1	0|1	0|1	.|.	1|1	0|1	0|1	0|1	1|1	0|1	1|1	0|1	0|1	0|1	1|1	1|1	1,8	3,24	0,6	2,10	3,13	1,3	.,.	0,7	3,7	2,14	1,10	0,11	1,3	0,4	2,11	2,3	5,2	0,1	0,2
Unigene0000161	255	255	A	G	SNP	.	9579.63	0|1	1|1	1|1	1|1	0|1	1|1	0|1	0|1	1|1	0|1	1|1	0|1	1|1	0|1	1|1	0|1	0|1	0|1	0|1	3,18	0,13	0,7	0,18	2,5	0,16	4,10	3,14	0,12	3,10	0,14	3,6	0,10	3,23	0,21	4,10	7,9	2,7	14,12
Unigene0000161	270	270	C	A	SNP	.	7161.81	0|1	1|1	1|1	1|1	0|1	1|1	0|1	0|1	1|1	0|1	1|1	0|1	1|1	0|1	1|1	0|1	0|1	0|1	0|1	4,16	0,5	0,7	0,12	2,5	0,13	4,6	3,12	0,9	6,10	0,12	3,3	0,6	3,14	0,14	4,5	6,7	2,4	14,11
Unigene0000177	241	241	T	C	SNP	.	5414.89	0|1	0|1	1|1	0|1	1|1	1|1	0|1	0|1	0|1	0|1	0|0	1|1	0|1	1|1	1|1	0|1	0|1	0|1	0|1	3,22	14,14	0,8	6,9	0,8	0,3	13,5	3,11	19,10	5,2	15,1	0,3	11,7	0,15	0,5	1,6	4,13	7,4	4,13
Unigene0000177	397	397	T	C	SNP	.	4932	0|1	0|1	1|1	0|1	1|1	1|1	0|1	0|1	0|1	0|1	0|1	1|1	0|1	1|1	1|1	0|1	0|1	0|1	0|1	2,14	12,10	0,2	5,6	0,11	0,3	11,8	6,4	18,5	3,2	15,3	0,6	9,10	0,14	0,5	3,5	3,16	7,1	3,9
Unigene0000185	221	221	A	T	SNP	.	2879.88	1|1	0|1	1|1	.|.	1|1	0|0	1|1	0|1	0|1	1|1	1|1	1|1	.|.	.|.	1|1	0|1	1|1	0|0	1|1	0,1	11,6	0,1	.,.	0,8	1,0	0,19	2,4	1,1	1,15	0,15	0,2	.,.	.,.	0,5	1,1	0,1	1,0	0,6
Unigene0000190	81	81	G	A	SNP	.	1655.1	.|.	0|1	0|0	0|1	0|1	0|0	1|1	.|.	0|0	0|0	1|1	0|1	1|1	0|0	1|1	1|1	0|1	1|1	0|1	.,.	14,2	5,0	6,1	4,1	10,0	0,5	.,.	38,2	1,0	0,1	3,1	0,7	21,1	0,6	0,4	23,11	0,2	12,9
Unigene0000190	802	802	C	G	SNP	.	9340.96	1|1	0|1	0|1	0|1	1|1	0|1	1|1	1|1	0|1	.|.	1|1	0|1	1|1	0|1	0|1	0|1	0|1	1|1	0|0	0,40	12,25	4,22	23,13	0,5	4,2	1,15	0,7	11,9	.,.	0,8	3,3	2,40	6,30	18,19	5,4	12,2	0,4	27,1
Unigene0000191	892	892	A	C	SNP	.	30170.6	0|1	1|1	0|1	0|1	0|1	0|1	0|1	0|1	1|1	1|1	1|1	0|1	1|1	0|1	0|1	0|1	1|1	1|1	1|1	26,46	0,54	11,14	24,29	36,27	9,20	27,61	68,35	0,92	0,51	0,62	18,20	0,48	37,36	12,34	16,13	0,46	0,34	0,90
Unigene0000193	594	594	A	C	SNP	.	2299.04	1|1	0|1	0|1	1|1	0|0	1|1	1|1	1|1	0|1	0|1	0|1	0|1	0|1	0|1	0|0	1|1	0|1	0|1	0|1	0,2	1,4	1,1	0,4	2,0	0,2	0,4	0,6	2,2	3,3	1,6	3,3	1,2	0,10	1,0	0,7	1,5	1,3	2,3
Unigene0000219	854	854	A	C	SNP	.	2917.93	0|0	1|1	0|1	1|1	1|1	0|1	1|1	0|1	0|1	1|1	1|1	1|1	1|1	1|1	1|1	1|1	1|1	1|1	1|1	9,0	0,8	2,1	0,9	0,4	1,1	0,10	10,5	3,5	0,2	0,3	0,4	0,3	0,5	0,3	0,2	0,7	0,1	0,3
Unigene0000234	620	620	A	G	SNP	.	421.92	0|1	1|1	.|.	0|1	.|.	.|.	.|.	.|.	.|.	.|.	1|1	.|.	1|1	1|1	.|.	1|1	0|1	1|1	1|1	5,1	0,2	.,.	1,1	.,.	.,.	.,.	.,.	.,.	.,.	0,1	.,.	0,1	0,1	.,.	0,1	1,2	0,1	0,1
Unigene0000244	239	239	T	A	SNP	.	2372.26	1|1	1|1	1|1	0|1	1|1	0|1	1|1	1|1	0|1	0|1	0|1	1|1	.|.	1|1	0|1	1|1	1|1	0|0	0|1	0,6	0,4	0,4	2,7	0,4	1,1	0,1	0,7	6,7	1,11	1,1	0,2	.,.	0,2	3,6	0,1	0,3	1,0	1,1
Unigene0000244	1357	1357	A	C	SNP	.	1637.55	0|1	0|0	1|1	1|1	0|1	1|1	1|1	0|0	0|1	0|0	1|1	0|1	1|1	0|1	1|1	1|1	1|1	.|.	1|1	4,1	2,0	0,3	0,2	4,2	0,2	0,3	1,0	1,5	2,0	0,7	4,1	0,4	5,1	0,1	0,2	0,2	.,.	0,2
Unigene0000245	721	721	A	G	SNP	.	9280.17	1|1	1|1	0|1	1|1	0|0	0|1	0|1	1|1	1|1	1|1	0|1	0|1	0|1	0|1	1|1	0|1	1|1	0|1	1|1	0,28	0,39	11,4	1,19	17,2	5,5	13,25	0,41	0,22	0,12	19,5	8,1	9,10	4,14	0,8	8,7	0,7	5,5	0,3
Unigene0000245	847	847	G	T	SNP	.	4640.93	1|1	1|1	0|1	0|1	0|1	0|1	0|1	1|1	1|1	0|1	0|1	1|1	0|1	0|1	1|1	0|1	1|1	0|1	1|1	0,3	0,26	3,4	2,13	1,4	2,1	4,7	0,12	0,15	1,1	4,1	0,4	1,2	3,3	0,1	3,3	0,4	1,1	0,6
Unigene0000245	912	912	G	T	SNP	.	3118.79	1|1	0|1	0|0	0|1	0|0	0|0	1|1	1|1	0|1	1|1	1|1	0|1	1|1	1|1	1|1	1|1	0|1	0|1	0|0	0,3	7,26	6,0	6,6	8,0	3,0	0,7	0,9	14,3	0,1	0,5	7,1	0,7	0,4	0,6	0,3	4,5	1,1	7,0
Unigene0000247	239	239	T	A	SNP	.	1243.65	1|1	0|0	.|.	1|1	1|1	0|0	0|1	1|1	0|1	0|0	0|1	0|1	0|0	1|1	0|0	1|1	1|1	.|.	.|.	0,3	15,0	.,.	0,6	0,2	3,0	4,3	0,13	7,2	5,0	3,1	1,1	3,0	0,3	4,0	0,2	0,1	.,.	.,.
Unigene0000247	979	979	A	T	SNP	.	4913.58	0|1	0|1	1|1	0|1	0|1	1|1	0|1	0|1	0|1	0|1	1|1	0|1	1|1	0|1	1|1	0|1	0|1	1|1	1|1	3,8	4,14	0,2	3,9	4,8	0,3	4,12	2,16	3,13	1,4	0,3	2,9	0,7	3,9	0,4	7,3	2,6	0,6	0,6
Unigene0000257	4824	4824	C	-	Deletion	.	10876.4	0|1	0|1	1|1	1|1	1|1	1|1	1|1	0|1	0|1	1|1	1|1	1|1	1|1	0|1	1|1	1|1	0|1	1|1	0|1	22,8	0,29	0,34	0,27	0,22	0,22	0,21	22,7	6,22	0,13	0,24	1,17	0,8	4,13	0,9	0,13	4,15	0,6	7,23
Unigene0000262	208	208	G	T	SNP	.	421.02	1|1	.|.	1|1	0|0	0|0	.|.	0|0	1|1	1|1	0|0	0|1	1|1	.|.	1|1	.|.	0|1	0|0	.|.	.|.	0,3	.,.	0,1	1,0	1,0	.,.	2,0	0,2	0,1	1,0	1,1	0,1	.,.	0,2	.,.	1,1	1,0	.,.	.,.
Unigene0000262	231	231	C	T	SNP	.	779.64	1|1	.|.	1|1	0|0	.|.	1|1	0|0	1|1	.|.	1|1	0|0	1|1	1|1	1|1	.|.	1|1	1|1	.|.	.|.	0,4	.,.	0,2	1,0	.,.	0,2	2,0	0,2	.,.	.	1,0	0,2	0,1	0,1	.,.	0,1	0,2	.,.	.,.
Unigene0000262	240	240	C	T	SNP	.	816.07	1|1	.|.	1|1	0|0	.|.	1|1	0|0	1|1	.|.	1|1	0|0	1|1	1|1	.|.	.|.	1|1	1|1	.|.	.|.	0,6	.,.	0,2	1,0	.,.	0,2	2,0	0,3	.,.	0,1	1,0	0,1	0,1	.,.	.,.	0,2	0,2	.,.	.,.
Unigene0000266	1702	1702	C	T	SNP	.	57415.1	0|1	0|1	1|1	1|1	1|1	1|1	1|1	1|1	1|1	1|1	0|1	1|1	0|1	0|1	0|1	0|1	0|1	1|1	1|1	53,14	32105	0,88	0,96	0,146	0,57	0,71	0,88	3,86	0,163	23103	1,66	69,58	27119	32,76	7,20	30,63	0,50	0,2
Unigene0000281	949	949	A	T	SNP	.	1169.01	.|.	0|1	1|1	1|1	1|1	1|1	1|1	1|1	0|1	0|0	1|1	1|1	0|1	1|1	0|0	1|1	0|0	0|1	0|1	.,.	12,7	0,3	0,1	0,6	0,1	0,3	0,3	8,1	3,0	0,1	0,3	2,1	0,1	4,0	0,2	4,0	1,3	3,1
Unigene0000291	748	748	G	T	SNP	.	4898.07	0|1	0|1	1|1	0|1	0|1	1|1	0|1	1|1	1|1	0|1	1|1	0|1	0|1	0|1	1|1	1|1	0|1	1|1	1|1	15,2	6,14	0,6	1,7	5,3	0,8	2,10	0,8	1,15	1,1	0,7	1,3	5,3	3,4	0,4	0,3	5,16	0,9	0,11
Unigene0000298	272	272	A	T	SNP	.	2086.93	1|1	1|1	0|1	1|1	0|1	0|1	0|1	.|.	1|1	0|1	0|1	0|1	1|1	0|1	1|1	1|1	1|1	.|.	1|1	0,1	0,3	1,1	0,1	4,2	1,3	7,4	.,.	0,1	1,2	2,7	3,1	0,3	4,5	0,5	0,6	0,5	.,.	0,9
Unigene0000302	453	453	A	G	SNP	.	22485.2	1|1	0|1	0|1	0|1	1|1	0|1	0|1	0|1	0|1	0|1	0|0	1|1	1|1	1|1	1|1	0|1	0|1	0|1	0|1	0,14	54,57	19,15	91,41	1,27	36,41	45,60	34,28	45,43	46,40	26,2	1,18	0,43	4,67	0,39	24,35	47,7	40,51	206,35
Unigene0000316	1084	1084	C	T	SNP	.	830.49	0|0	0|1	0|1	1|1	.|.	.|.	1|1	0|0	0|1	.|.	.|.	1|1	1|1	1|1	1|1	1|1	.|.	.|.	.|.	1,0	1,1	1,1	0,6	.,.	.,.	0,4	1,0	1,3	.,.	.,.	0,1	0,2	0,3	0,1	0,2	.,.	.,.	.,.
Unigene0000322	921	921	A	T	SNP	.	2950.35	0|1	0|1	0|1	0|1	0|0	1|1	0|1	1|1	1|1	0|1	0|1	1|1	0|1	0|1	0|1	0|0	1|1	1|1	1|1	1,9	3,7	2,3	10,3	3,0	0,2	2,1	0,2	0,7	6,11	5,5	0,1	8,2	9,3	1,5	1,0	0,9	0,3	0,10
Unigene0000329	232	232	G	T	SNP	.	1282.4	1|1	1|1	0|1	0|1	0|1	1|1	0|1	1|1	0|1	1|1	0|1	.|.	0|0	0|1	1|1	0|1	0|1	0|0	0|1	0,1	0,5	2,1	6,4	3,4	0,1	7,3	0,5	4,4	0,1	2,2	.,.	1,0	3,2	0,1	2,1	1,3	1,0	1,3
Unigene0000329	383	383	A	C	SNP	.	1559.45	1|1	0|1	1|1	1|1	0|1	0|1	0|1	0|1	0|1	1|1	0|1	1|1	1|1	0|1	.|.	0|1	0|1	1|1	0|1	0,1	4,7	0,5	0,5	4,1	1,3	5,1	3,1	3,6	0,1	2,5	0,1	0,1	4,3	.,.	1,2	2,1	0,4	2,2
Unigene0000332	497	497	C	G	SNP	.	515.78	0|0	1|1	0|0	0|1	1|1	0|0	0|1	1|1	0|0	1|1	1|1	1|1	0|0	0|1	0|1	0|0	0|1	0|0	.|.	7,0	0,1	1,0	1,1	0,1	2,0	1,1	0,1	1,0	0,1	0,1	0,3	1,0	2,4	2,1	2,0	2,2	3,0	.,.
Unigene0000333	157	157	A	C	SNP	.	2153.5	0|0	0|1	1|1	0|1	1|1	0|0	1|1	0|0	0|1	0|0	0|1	1|1	0|1	0|1	1|1	1|1	0|1	0|0	0|1	9,0	3,11	0,2	5,9	0,1	3,0	0,7	8,0	4,1	6,0	2,3	0,1	1,1	4,8	0,3	0,8	6,5	5,0	3,3
Unigene0000333	397	397	A	C	SNP	.	2633.47	0|1	0|1	1|1	1|1	1|1	0|1	0|0	.|.	1|1	1|1	1|1	1|1	1|1	0|1	1|1	1|1	0|1	1|1	0|1	3,4	4,3	0,6	0,19	0,4	1,3	1,0	.,.	0,2	0,7	0,9	0,1	0,4	1,6	0,4	0,2	1,2	0,1	2,1
Unigene0000334	184	184	C	A	SNP	.	1963.54	1|1	0|1	0|0	0|1	1|1	1|1	0|0	1|1	0|0	1|1	1|1	1|1	0|1	0|1	0|1	0|0	0|1	.|.	0|1	.	5,2	7,0	12,1	0,3	0,2	15,0	.	39,1	0,4	0,3	0,1	2,3	20,5	4,2	13,1	8,7	.,.	11,19
Unigene0000334	206	206	G	A	SNP	.	1958.49	1|1	0|1	0|0	0|0	1|1	1|1	0|0	1|1	0|0	1|1	1|1	1|1	0|1	0|0	0|1	0|0	0|1	.|.	0|1	0,6	5,2	5,0	11,0	0,3	0,2	15,0	0,2	30,1	0,4	0,1	0,1	2,3	16,1	4,1	13,0	6,7	.,.	11,19
Unigene0000334	279	279	G	A	SNP	.	1056.59	0|0	.|.	1|1	1|1	.|.	.|.	1|1	0|0	1|1	.|.	0|0	.|.	.|.	1|1	1|1	1|1	1|1	.|.	1|1	15,0	.,.	0,2	0,2	.,.	.,.	0,3	11,0	0,5	.,.	1,0	.,.	.,.	0,3	0,2	0,3	0,2	.,.	0,4
Unigene0000334	280	280	-	C	Insertion	.	1047.55	0|0	.|.	1|1	1|1	.|.	.|.	1|1	0|0	1|1	.|.	0|0	.|.	.|.	1|1	1|1	1|1	1|1	.|.	1|1	16,0	.,.	0,2	0,1	.,.	.,.	0,2	11,0	0,4	.,.	1,0	.,.	.,.	0,2	0,2	0,3	0,2	.,.	0,2
Unigene0000338	225	225	A	G	SNP	.	22992.9	1|1	0|1	1|1	1|1	0|1	1|1	1|1	1|1	0|1	1|1	0|1	0|1	0|1	0|1	0|1	1|1	0|1	0|0	0|1	0,33	5,41	0,15	0,87	4,6	0,31	0,30	0,18	10,20	1,14	1,12	3,9	7,24	11,70	7,51	0,23	18,37	1,0	20,49
Unigene0000341	1225	1225	A	C	SNP	.	1668.3	1|1	0|1	0|1	0|0	.|.	1|1	0|1	1|1	1|1	1|1	0|1	0|0	1|1	1|1	0|1	.|.	0|1	0|1	1|1	0,3	3,2	2,1	3,0	.,.	0,1	1,2	0,2	0,6	0,4	2,4	1,0	1,6	0,3	2,2	.,.	2,4	1,2	0,3
Unigene0000342	207	207	A	-	Deletion	.	2716.85	.|.	0|1	0|1	1|1	0|1	1|1	1|1	.|.	0|1	1|1	1|1	0|1	0|1	1|1	0|0	0|1	0|1	1|1	1|1	.,.	1,3	1,6	0,3	4,2	0,1	0,5	.,.	3,8	1,7	0,8	1,3	3,5	0,8	1,0	3,1	1,3	0,3	0,3
Unigene0000342	208	208	A	C	SNP	.	2725.9	.|.	0|1	0|1	1|1	0|1	1|1	1|1	.|.	0|1	1|1	1|1	0|1	0|1	1|1	0|0	0|1	0|1	1|1	1|1	.,.	1,3	1,6	0,3	5,2	0,1	0,5	.,.	3,8	1,7	0,8	1,3	3,5	0,8	1,0	3,1	1,3	0,3	0,3
Unigene0000342	464	464	C	T	SNP	.	2609.6	1|1	0|1	0|0	1|1	0|1	1|1	0|1	1|1	0|1	0|1	.|.	0|1	0|1	1|1	0|0	0|0	0|0	1|1	0|0	0,1	16,13	7,0	0,5	15,5	0,1	6,5	0,9	27,6	7,14	.,.	3,1	2,3	0,1	2,0	3,0	2,0	0,3	14,0
Unigene0000343	589	589	C	T	SNP	.	1914.77	0|1	0|1	0|1	0|1	0|1	1|1	0|0	0|1	0|1	1|1	0|1	0|1	1|1	0|1	1|1	0|1	0|1	1|1	1|1	4,2	4,8	2,3	10,1	4,3	0,4	19,0	1,8	17,3	0,3	1,5	2,3	0,3	11,2	0,3	3,2	2,1	0,2	0,4
Unigene0000351	2003	2003	A	G	SNP	.	6485.42	1|1	0|1	0|1	0|1	1|1	0|1	0|1	1|1	0|1	1|1	0|1	1|1	0|1	0|1	0|1	0|1	1|1	0|1	1|1	0,30	4,5	8,4	10,14	0,13	1,7	10,10	1,24	1,8	0,13	10,3	0,2	5,9	22,12	3,9	3,3	0,6	3,4	0,6
Unigene0000353	1001	1001	G	A	SNP	.	829.57	.|.	1|1	1|1	0|1	1|1	.|.	1|1	0|0	0|1	0|0	1|1	1|1	1|1	.|.	.|.	1|1	.|.	.|.	.|.	.,.	0,3	0,4	2,3	0,1	.,.	0,2	1,0	1,2	2,0	0,1	0,1	0,4	.,.	.,.	0,2	.,.	.,.	.,.
Unigene0000355	292	292	T	G	SNP	.	10574.2	1|1	1|1	0|1	0|1	0|1	1|1	0|1	0|1	1|1	1|1	1|1	0|1	1|1	0|0	.|.	.|.	1|1	1|1	1|1	0,36	0,35	6,8	14,23	6,8	0,26	9,15	15,15	0,24	0,14	0,6	8,3	0,20	12,0	.,.	.,.	0,11	0,8	0,3
Unigene0000362	217	217	C	G	SNP	.	2602.83	1|1	1|1	1|1	0|1	1|1	1|1	0|1	1|1	0|1	1|1	0|0	0|1	1|1	1|1	0|1	1|1	0|0	.|.	0|1	0,7	0,7	1,3	5,7	0,1	0,5	3,5	0,4	2,1	0,5	1,0	1,1	0,1	0,7	1,8	0,2	1,0	.,.	3,8
Unigene0000364	120	120	G	T	SNP	.	14264.8	0|0	1|1	0|1	1|1	1|1	0|1	1|1	0|0	1|1	0|1	0|1	1|1	1|1	1|1	1|1	1|1	0|1	0|0	1|1	3,0	0,130	3,5	0,24	0,16	3,14	0,16	1,0	1,15	21,44	0,13	0,14	0,7	0,57	0,17	0,3	0,6	12,0	0,21
Unigene0000373	154	154	T	C	SNP	.	1075.89	0|0	.|.	.|.	0|1	1|1	.|.	1|1	0|1	.|.	1|1	.|.	0|1	.|.	1|1	.|.	1|1	0|0	.|.	1|1	1,0	.,.	.,.	5,3	0,3	.,.	0,1	6,7	.,.	0,2	.,.	5,11	.,.	0,1	.,.	0,1	1,0	.,.	0,1
Unigene0000374	225	225	A	G	SNP	.	15539.9	1|1	0|1	0|1	1|1	1|1	0|1	1|1	1|1	1|1	1|1	1|1	1|1	1|1	1|1	0|1	0|1	0|1	1|1	0|1	0,2	5,55	6,25	0,34	0,11	9,24	0,23	0,5	0,48	0,13	0,12	0,7	0,10	0,27	4,26	4,15	5,26	0,9	8,33
Unigene0000375	671	671	T	C	SNP	.	1647.18	0|0	0|0	1|1	0|1	1|1	1|1	0|1	0|0	1|1	1|1	0|1	0|1	0|0	1|1	0|1	0|0	0|1	.|.	0|1	8,0	1,0	0,4	5,2	0,2	0,4	2,2	1,0	0,4	0,2	1,2	2,6	3,0	0,9	1,3	1,0	4,7	.,.	4,1
Unigene0000393	130	130	C	T	SNP	.	1525.15	0|1	0|1	1|1	0|1	0|1	1|1	.|.	1|1	1|1	0|1	1|1	0|0	1|1	0|1	1|1	0|0	0|1	.|.	0|1	3,5	2,1	0,5	4,3	3,1	0,3	.,.	0,2	0,5	1,1	0,3	1,0	0,2	1,4	0,1	2,0	3,3	.,.	1,3
Unigene0000394	175	175	T	C	SNP	.	1422.8	0|0	0|1	0|1	0|1	0|1	0|1	1|1	0|1	1|1	0|1	1|1	1|1	0|1	0|1	0|1	0|1	0|1	1|1	1|1	2,0	9,3	2,1	3,1	2,4	3,2	0,4	3,2	0,2	4,2	0,1	0,1	4,8	1,6	1,1	2,1	1,1	0,1	0,2
Unigene0000394	205	205	T	C	SNP	.	3930.24	1|1	0|1	0|1	0|1	0|1	0|1	0|1	1|1	0|1	0|1	1|1	0|1	0|1	0|1	0|1	0|1	1|1	1|1	1|1	0,3	9,10	2,5	11,3	5,9	1,5	3,1	0,1	5,7	7,8	0,8	1,5	5,10	1,11	1,4	4,1	0,7	0,3	0,9
Unigene0000396	73	73	C	T	SNP	.	10755.1	1|1	.|.	0|1	1|1	1|1	0|1	1|1	1|1	0|1	1|1	1|1	1|1	1|1	1|1	.|.	1|1	0|0	1|1	0|0	0,51	.,.	11,2	0,44	0,16	15,10	0,21	0,21	33,3	0,1	0,27	0,13	0,13	1,25	.,.	1,16	16,0	0,3	29,0
Unigene0000396	95	95	A	G	SNP	.	5748.42	0|0	1|1	0|1	0|0	0|1	0|1	0|0	0|0	1|1	1|1	0|1	0|0	0|1	0|0	1|1	0|1	1|1	1|1	1|1	54,0	0,4	2,11	44,0	16,2	10,18	21,0	21,0	2,38	0,1	27,3	13,1	8,6	25,1	0,1	16,2	0,18	0,3	0,39
Unigene0000396	291	291	A	C	SNP	.	11617.1	1|1	0|0	1|1	1|1	0|1	0|1	1|1	1|1	0|1	1|1	0|1	0|1	0|1	1|1	0|1	0|1	0|1	0|1	0|1	0,41	111,4	0,9	0,50	15,5	29,17	0,18	0,25	19,15	0,2	28,10	8,10	6,2	0,39	23,19	21,5	26,13	5,2	112,25
Unigene0000396	362	362	A	G	SNP	.	7211.01	1|1	0|0	1|1	1|1	0|1	0|0	1|1	1|1	0|1	.|.	0|0	0|1	1|1	1|1	0|1	0|1	0|1	1|1	0|1	0,15	122,0	0,2	0,8	15,4	25,0	0,11	0,1	24,12	.,.	25,0	5,7	0,3	0,24	31,18	33,6	23,15	0,3	102,48
Unigene0000396	387	387	G	A	SNP	.	13076.3	1|1	0|0	1|1	1|1	0|1	0|1	1|1	1|1	0|1	1|1	0|1	0|1	1|1	1|1	0|1	0|1	0|1	1|1	0|1	0,19	127,0	0,5	0,32	15,9	24,3	0,27	0,5	26,18	0,4	21,6	6,12	0,1	0,48	40,37	33,11	33,26	0,5	94,93
Unigene0000408	622	622	T	A	SNP	.	1445.43	0|0	1|1	1|1	1|1	0|1	.|.	1|1	0|0	.|.	1|1	0|0	1|1	.|.	1|1	0|0	0|1	0|0	.|.	0|1	1,0	0,6	0,1	0,4	2,3	.,.	0,7	4,0	.,.	0,6	1,0	0,4	.,.	0,3	1,0	2,0	1,0	.,.	4,1
Unigene0000408	627	627	T	A	SNP	.	1481.78	0|0	1|1	.|.	1|1	0|1	.|.	1|1	0|0	.|.	1|1	0|0	1|1	.|.	1|1	0|0	0|1	0|0	.|.	0|1	1,0	0,7	.,.	0,4	2,3	.,.	0,7	4,0	.,.	0,7	1,0	0,4	.,.	0,2	1,0	2,1	1,0	.,.	4,1
Unigene0000409	778	778	A	C	SNP	.	801.15	1|1	1|1	.|.	0|0	.|.	0|1	0|0	1|1	1|1	1|1	0|0	0|0	.|.	0|0	1|1	.|.	0|0	0|0	1|1	0,4	0,8	.,.	2,0	.,.	1,3	4,0	0,1	0,3	0,1	1,0	1,0	.,.	1,0	0,1	.,.	1,0	2,0	0,1
Unigene0000410	624	624	G	A	SNP	.	26357.6	1|1	0|1	0|1	0|1	0|1	0|1	1|1	1|1	0|1	1|1	1|1	0|1	1|1	1|1	1|1	1|1	0|1	0|1	0|1	0,72	54,34	26,25	61,25	28,25	48,12	0,60	0,58	70,22	0,68	0,39	21,13	0,29	0,36	0,41	0,62	45,54	14,17	50,34
Unigene0000410	671	671	C	A	SNP	.	27680.6	1|1	0|1	0|1	0|1	0|1	0|1	1|1	1|1	0|1	1|1	1|1	0|1	1|1	1|1	1|1	1|1	0|1	0|1	0|1	0,96	63,28	37,39	70,17	29,30	61,14	0,72	0,81	91,18	0,84	0,48	38,11	0,28	1,47	0,28	0,47	57,36	21,14	81,23
Unigene0000427	861	861	C	T	SNP	.	6043.81	1|1	0|1	0|1	0|1	0|1	1|1	0|0	1|1	0|1	0|1	0|1	0|1	1|1	1|1	1|1	0|1	1|1	1|1	1|1	0,20	16,26	1,1	15,12	1,4	0,4	15,1	0,13	2,5	18,9	5,3	4,7	0,7	0,11	0,3	2,3	0,7	0,11	0,10
Unigene0000427	1008	1008	A	G	SNP	.	1912.4	.|.	1|1	.|.	0|0	0|0	1|1	0|1	.|.	1|1	1|1	0|0	0|0	1|1	1|1	1|1	0|1	1|1	1|1	1|1	.,.	0,4	.,.	12,0	2,0	0,1	7,11	.,.	0,1	0,10	4,0	2,0	0,5	0,3	0,2	1,2	0,3	0,3	0,1
Unigene0000439	255	255	A	T	SNP	.	2909.51	0|0	1|1	.|.	1|1	1|1	1|1	1|1	0|0	1|1	0|1	.|.	1|1	1|1	0|1	.|.	0|1	1|1	1|1	1|1	6,0	0,7	.,.	0,6	0,7	0,1	0,6	12,0	0,7	1,1	.,.	0,13	0,2	6,1	.,.	1,2	0,2	0,1	0,11
Unigene0000439	260	260	C	T	SNP	.	2835.56	0|0	1|1	.|.	1|1	1|1	1|1	1|1	0|0	1|1	0|1	.|.	1|1	1|1	0|1	.|.	0|1	1|1	1|1	1|1	6,0	0,7	.,.	0,7	0,6	0,1	0,6	11,0	0,5	1,1	.,.	0,13	0,2	6,1	.,.	1,2	0,2	0,1	0,11
Unigene0000446	480	480	C	G	SNP	.	4446.43	1|1	0|1	1|1	1|1	1|1	1|1	0|1	1|1	1|1	0|1	1|1	.|.	1|1	1|1	0|1	1|1	1|1	0|1	0|1	0,3	5,16	0,1	0,11	0,6	0,4	4,10	0,5	0,5	9,17	0,7	.,.	0,5	0,3	6,10	0,6	0,4	2,3	3,4
Unigene0000449	750	750	A	G	SNP	.	548.37	1|1	0|0	0|0	0|0	0|1	0|1	1|1	0|0	0|1	1|1	.|.	1|1	1|1	.|.	.|.	1|1	1|1	0|0	.|.	0,2	1,0	3,1	1,0	1,1	3,1	0,3	2,0	2,4	0,1	.,.	0,1	0,2	.,.	.,.	0,1	0,1	1,0	.,.
Unigene0000452	281	281	A	G	SNP	.	9466.65	0|1	0|1	1|1	1|1	1|1	1|1	0|1	0|1	0|1	0|1	0|1	0|1	0|1	1|1	1|1	0|1	1|1	0|1	0|1	3,14	2,19	0,13	0,24	0,7	0,23	4,8	1,5	4,10	4,9	4,2	2,4	2,8	2,22	0,16	2,9	1,15	2,7	2,21
Unigene0000452	289	289	A	C	SNP	.	8459.2	0|1	1|1	1|1	1|1	1|1	1|1	0|1	0|1	0|1	1|1	0|1	0|1	1|1	1|1	1|1	1|1	0|1	0|1	1|1	1,12	1,16	0,12	0,21	0,5	0,22	1,7	0,4	0,10	0,6	0,2	1,3	0,8	0,18	0,7	0,7	0,13	0,6	0,18
Unigene0000461	1054	1054	T	C	SNP	.	986.51	1|1	0|1	0|1	1|1	1|1	.|.	1|1	.|.	.|.	1|1	1|1	0|0	0|1	1|1	0|1	1|1	0|1	0|1	1|1	0,1	11,3	2,3	0,2	0,1	.,.	0,1	.,.	.,.	0,2	0,1	3,0	3,2	0,6	1,1	0,1	3,2	3,2	0,2
Unigene0000461	1072	1072	C	T	SNP	.	5576.11	1|1	0|1	1|1	1|1	1|1	1|1	1|1	1|1	1|1	1|1	1|1	0|1	0|1	1|1	0|1	1|1	0|1	0|1	1|1	0,5	5,11	0,8	0,12	0,6	0,6	0,5	0,2	0,6	0,8	0,6	1,2	3,6	0,18	1,10	0,4	2,11	2,10	0,9
Unigene0000462	1261	1261	T	C	SNP	.	24283	0|0	1|1	0|1	1|1	1|1	1|1	1|1	1|1	0|1	1|1	1|1	1|1	0|1	1|1	1|1	1|1	0|1	1|1	0|1	25,0	0,120	9,49	0,22	0,52	2,17	0,30	0,6	14,3	0,12	0,42	0,42	11,17	0,46	0,61	0,8	31,30	0,12	5,29
Unigene0000462	1441	1441	C	T	SNP	.	10248	.|.	1|1	0|1	0|1	0|1	1|1	0|1	0|1	0|1	1|1	0|1	1|1	0|1	0|1	1|1	1|1	1|1	1|1	0|1	.,.	0,38	7,21	5,3	2,19	0,6	1,11	1,1	2,1	0,4	2,14	1,21	2,9	1,15	2,30	0,5	0,20	0,7	1,14
Unigene0000462	1442	1442	A	G	SNP	.	10263	.|.	1|1	0|1	0|1	0|1	1|1	0|1	0|1	0|1	1|1	0|1	1|1	0|1	0|1	1|1	1|1	1|1	1|1	0|1	.,.	0,39	7,22	5,5	2,19	0,6	1,11	1,1	2,1	0,4	2,14	1,21	1,9	1,15	2,30	0,5	0,20	0,7	1,14
Unigene0000469	1875	1875	A	T	SNP	.	4744.64	1|1	0|1	0|1	0|1	0|1	0|1	0|1	1|1	0|1	1|1	1|1	0|1	0|1	0|1	0|1	1|1	0|1	1|1	1|1	0,16	3,12	1,4	3,3	3,2	4,6	4,5	0,13	1,12	0,2	0,6	1,4	6,1	11,9	3,6	0,7	2,7	0,1	0,3
Unigene0000469	2409	2409	C	T	SNP	.	1695.66	1|1	1|1	0|1	0|1	0|0	0|1	0|1	0|1	1|1	1|1	1|1	0|0	1|1	0|1	.|.	1|1	0|1	.|.	1|1	0,3	0,1	1,2	8,5	1,0	1,3	3,3	1,7	0,7	0,1	0,10	2,0	0,4	11,5	.,.	0,4	1,2	.,.	0,2
Unigene0000473	100	100	A	C	SNP	.	8982.72	1|1	0|1	0|0	0|1	0|1	0|1	0|1	1|1	1|1	0|1	0|1	0|1	0|1	0|1	0|1	0|1	1|1	1|1	1|1	0,19	61,15	14,0	43,19	6,8	9,13	49,20	0,31	0,11	5,25	17,5	12,7	7,12	86,20	10,14	7,18	0,22	0,5	0,31
Unigene0000473	221	221	C	T	SNP	.	15624.8	1|1	1|1	1|1	1|1	0|1	1|1	0|1	1|1	0|1	1|1	0|1	0|1	1|1	1|1	0|1	1|1	0|1	1|1	0|1	0,11	0,68	1,22	2,50	3,7	0,22	7,42	0,14	5,11	0,15	8,11	2,16	0,17	4,77	4,19	0,20	6,6	0,2	7,10
Unigene0000476	1908	1908	A	G	SNP	.	503.61	1|1	0|1	1|1	0|0	0|1	0|0	1|1	1|1	0|1	1|1	1|1	.|.	0|1	.|.	.|.	.|.	.|.	0|0	1|1	0,2	12,2	0,1	12,0	1,1	2,0	0,1	0,1	5,1	0,2	0,1	.,.	5,2	.,.	.,.	.,.	.,.	3,0	0,3
Unigene0000481	1065	1065	G	C	SNP	.	2627.79	1|1	1|1	0|1	0|1	1|1	0|1	1|1	1|1	1|1	1|1	0|1	1|1	.|.	0|1	0|0	1|1	0|1	1|1	1|1	0,10	0,7	3,9	9,8	0,3	3,2	0,7	0,5	0,3	0,2	7,2	0,1	.,.	4,7	2,0	0,3	2,1	0,1	0,2
Unigene0000484	70	70	A	G	SNP	.	3218.05	.|.	1|1	0|1	1|1	0|1	.|.	0|1	.|.	1|1	0|0	1|1	1|1	.|.	0|1	0|1	0|0	1|1	.|.	1|1	.,.	0,1	1,2	0,7	2,9	.,.	5,15	.,.	0,12	1,0	0,2	0,3	.,.	14,6	11,7	2,0	0,3	.,.	0,21
Unigene0000484	372	372	T	C	SNP	.	28763.2	1|1	0|1	1|1	1|1	1|1	0|1	1|1	1|1	1|1	0|1	0|1	1|1	1|1	0|1	0|1	0|1	0|1	1|1	0|1	0,30	68,49	0,34	2,42	0,40	13,19	0,59	0,37	0,68	14,99	32,29	0,14	0,37	16,37	16,73	3,21	12,34	0,17	19,47
Unigene0000486	583	583	A	G	SNP	.	1973.93	1|1	0|0	0|0	0|1	0|1	0|1	0|1	1|1	0|1	1|1	1|1	1|1	0|1	0|1	0|1	0|1	1|1	.|.	0|1	0,5	5,0	6,0	3,3	3,1	1,4	5,4	0,7	8,1	0,8	0,1	0,1	1,7	3,6	3,1	1,1	0,3	.,.	4,5
Unigene0000486	1028	1028	C	T	SNP	.	4248.7	1|1	1|1	1|1	0|1	0|1	0|1	1|1	1|1	0|1	0|1	0|1	0|1	1|1	0|1	1|1	1|1	0|1	1|1	0|1	0,5	0,14	0,5	3,6	2,2	2,2	0,6	0,2	11,19	2,7	1,3	1,1	0,6	2,6	0,1	0,6	7,3	0,2	4,9
Unigene0000498	1026	1026	C	A	SNP	.	15799.1	0|1	0|1	0|1	1|1	1|1	1|1	1|1	0|1	0|1	0|1	1|1	1|1	0|1	0|1	0|1	0|1	0|1	0|1	0|1	16,15	7,44	4,21	0,38	0,27	0,16	3,34	22,15	6,22	15,12	0,23	0,43	8,17	6,31	2,6	4,16	12,22	3,10	6,12
Unigene0000498	1970	1970	T	-	Deletion	.	7043.59	1|1	0|1	1|1	0|1	1|1	0|1	1|1	1|1	0|1	1|1	0|1	1|1	0|1	1|1	0|1	1|1	0|1	0|1	1|1	0,19	19,15	0,13	16,16	0,15	5,8	0,18	0,13	9,6	0,10	5,3	0,14	4,12	1,17	5,14	0,13	3,12	2,4	1,13
Unigene0000501	98	98	A	G	SNP	.	101575	0|0	1|1	0|1	0|1	0|1	0|1	0|1	0|1	0|1	1|1	0|1	0|1	1|1	1|1	0|1	0|1	1|1	1|1	1|1	239,3	1270	69,59	41204	30164	70110	56180	208,82	156,52	0,140	41163	38147	1174	0,209	57169	46161	0,137	3125	0,259
Unigene0000501	148	148	C	T	SNP	.	176830	0|0	1|1	0|1	0|1	1|1	0|1	0|1	0|1	0|1	1|1	0|1	1|1	1|1	0|1	0|1	0|1	1|1	1|1	1|1	368,0	1461	42154	191226	0,302	96246	103296	255168	158170	0,306	154179	1275	3283	125215	92291	81249	0,225	2246	0,406
Unigene0000507	805	805	G	A	SNP	.	21180.8	1|1	1|1	0|1	0|1	1|1	1|1	0|1	1|1	0|1	1|1	1|1	1|1	0|1	0|1	1|1	0|1	1|1	0|1	1|1	0,0	0,29	15,6	34,35	0,30	0,15	13,37	0,13	32,36	0,49	0,29	0,21	30,29	24,49	0,21	5,14	0,49	7,23	0,64
Unigene0000507	833	833	G	A	SNP	.	881.9	.|.	1|1	0|1	0|0	1|1	1|1	0|1	.|.	0|1	1|1	1|1	.|.	0|1	0|1	.|.	0|1	1|1	0|1	1|1	.,.	0,1	7,1	22,1	0,1	0,1	10,4	.,.	17,3	0,1	0,1	.,.	24,3	13,5	.,.	4,1	0,3	1,1	0,5
Unigene0000513	635	635	T	G	SNP	.	1260.25	.|.	1|1	0|1	0|1	1|1	1|1	1|1	0|1	0|1	.|.	0|1	1|1	1|1	1|1	1|1	1|1	1|1	1|1	.|.	.,.	0,6	1,1	1,2	0,2	0,1	0,1	2,2	1,3	.,.	1,3	0,1	0,2	0,1	0,2	0,2	0,2	0,3	.,.
Unigene0000514	158	158	A	T	SNP	.	3690.15	0|1	0|1	0|1	0|1	0|1	0|1	0|1	1|1	1|1	1|1	0|1	0|1	0|1	1|1	1|1	1|1	0|1	1|1	1|1	2,8	8,6	1,6	4,10	1,8	2,3	2,3	0,5	1,15	0,1	5,4	2,3	3,3	0,10	0,4	0,3	4,4	0,2	0,7
Unigene0000536	1087	1087	T	C	SNP	.	2690.02	0|1	0|1	0|1	0|1	1|1	0|1	0|1	.|.	0|1	1|1	1|1	1|1	1|1	0|1	0|1	0|1	0|1	1|1	0|1	7,2	6,5	8,1	13,6	0,3	1,4	5,2	.,.	7,5	0,4	0,6	0,3	0,2	14,7	3,4	2,3	12,10	0,1	10,3
Unigene0000536	1228	1228	A	G	SNP	.	5348.07	1|1	1|1	1|1	0|1	1|1	0|1	1|1	1|1	1|1	0|1	0|1	1|1	1|1	1|1	1|1	1|1	0|1	1|1	0|1	0,7	0,14	0,7	9,8	0,2	2,8	0,5	0,5	0,10	2,1	4,3	0,6	0,5	0,18	0,3	0,4	2,16	0,5	5,18
Unigene0000542	216	216	A	G	SNP	.	14277.6	0|1	1|1	1|1	0|1	0|1	1|1	0|1	1|1	1|1	0|1	1|1	1|1	0|1	1|1	0|1	0|1	0|1	0|1	0|1	6,15	0,21	0,12	3,19	7,14	0,9	10,18	0,27	0,45	10,25	0,13	0,8	10,11	0,26	30,44	4,9	14,24	13,4	3,9
Unigene0000545	2615	2615	G	T	SNP	.	1947.59	1|1	0|1	0|1	1|1	1|1	1|1	1|1	.|.	0|1	0|0	0|1	1|1	0|0	0|1	0|0	1|1	0|1	.|.	1|1	0,3	3,2	1,3	0,12	0,2	0,1	0,4	.,.	1,6	2,0	2,2	0,1	1,0	2,4	1,0	0,1	1,4	.,.	0,4
Unigene0000552	585	585	A	G	SNP	.	1745.65	1|1	0|1	1|1	0|1	1|1	0|1	1|1	0|1	0|1	0|0	0|1	1|1	1|1	0|1	0|0	0|0	0|1	1|1	0|1	0,4	2,2	0,3	2,4	0,4	3,1	0,1	1,3	3,9	5,0	2,3	0,1	0,4	7,3	3,0	3,0	7,3	0,1	2,7
Unigene0000552	614	614	A	G	SNP	.	3157.83	0|1	0|1	1|1	0|1	1|1	0|1	0|1	0|0	0|1	1|1	1|1	0|1	0|1	0|1	0|1	1|1	0|1	0|1	1|1	1,5	2,6	0,2	1,5	0,3	1,7	1,2	4,0	1,11	0,6	0,4	1,1	1,4	1,9	1,2	0,2	1,9	1,1	0,8
Unigene0000553	259	259	T	C	SNP	.	5731.25	1|1	0|1	0|1	1|1	0|1	0|1	1|1	0|1	0|1	0|1	0|1	0|1	1|1	1|1	1|1	1|1	0|1	0|1	0|1	1,15	18,3	5,2	0,11	3,2	5,10	0,8	6,7	7,8	3,8	5,15	4,1	0,11	0,22	0,7	0,5	3,6	2,10	5,3
Unigene0000555	1104	1104	A	C	SNP	.	11599.9	0|1	0|1	1|1	1|1	1|1	0|1	1|1	0|1	1|1	0|1	0|1	1|1	0|1	1|1	0|1	1|1	0|1	0|1	0|1	6,11	11,18	0,23	0,45	0,15	6,13	0,19	12,5	0,25	1,11	11,13	0,18	10,6	0,36	3,6	0,5	4,19	5,1	7,22
Unigene0000556	138	138	C	T	SNP	.	1000.45	0|0	1|1	1|1	0|1	.|.	1|1	0|1	0|1	0|1	0|1	1|1	1|1	1|1	1|1	.|.	0|1	0|0	1|1	0|0	1,0	0,3	0,6	1,3	.,.	0,1	1,1	2,6	1,1	2,2	0,1	0,3	0,1	0,2	.,.	4,1	1,0	0,1	4,0
Unigene0000558	103	103	C	T	SNP	.	2184.3	.|.	0|0	0|1	1|1	1|1	.|.	0|1	0|0	0|0	0|0	1|1	0|1	.|.	.|.	1|1	.|.	1|1	0|0	1|1	.,.	2,0	3,3	0,4	0,11	.,.	1,5	5,0	1,0	1,0	0,1	3,16	.,.	.,.	0,1	.,.	0,1	1,0	1,21
Unigene0000558	266	266	A	G	SNP	.	4226.9	1|1	1|1	0|1	0|1	0|1	1|1	0|1	1|1	1|1	1|1	1|1	0|1	1|1	1|1	0|0	1|1	1|1	1|1	0|0	0,1	0,23	5,8	4,6	18,12	0,1	4,6	0,5	0,4	0,19	0,1	22,19	0,1	0,5	2,0	0,4	0,1	0,1	29,2
Unigene0000558	398	398	A	G	SNP	.	1561.23	0|1	1|1	.|.	.|.	1|1	.|.	1|1	0|1	0|1	0|1	.|.	1|1	0|0	.|.	.|.	1|1	.|.	0|0	1|1	5,1	0,7	.,.	.,.	0,5	.,.	0,1	17,10	1,2	3,2	.,.	0,6	1,0	.,.	.,.	0,1	.,.	9,0	0,8
Unigene0000558	404	404	A	C	SNP	.	1742.65	0|0	1|1	.|.	.|.	1|1	.|.	1|1	0|1	1|1	0|1	.|.	1|1	1|1	.|.	1|1	.|.	.|.	0|1	1|1	5,0	0,2	.,.	.,.	0,4	.,.	0,1	17,9	0,4	3,6	.,.	0,4	0,2	.,.	0,1	.,.	.,.	4,2	0,7
Unigene0000558	417	417	C	G	SNP	.	2156.01	0|0	1|1	1|1	1|1	1|1	.|.	1|1	0|1	0|1	0|1	.|.	1|1	0|1	.|.	1|1	.|.	1|1	0|0	1|1	5,0	0,4	0,4	0,1	0,6	.,.	0,1	24,2	1,9	2,12	.,.	0,6	1,1	.,.	0,2	.,.	0,1	6,0	0,7
Unigene0000559	267	267	T	A	SNP	.	1423.29	0|0	0|1	1|1	0|1	1|1	1|1	0|1	0|1	0|0	0|1	1|1	1|1	0|1	1|1	0|1	0|1	0|1	.|.	0|1	5,0	1,3	0,3	1,5	0,4	0,1	1,2	3,1	4,0	2,2	0,1	0,4	3,2	0,4	6,2	1,3	4,2	.,.	1,2
Unigene0000560	400	400	T	G	SNP	.	956.47	1|1	0|0	0|1	0|0	0|0	0|0	.|.	1|1	0|0	1|1	0|1	0|0	.|.	1|1	0|0	.|.	1|1	.|.	1|1	0,3	12,0	1,1	6,0	1,0	2,0	.,.	0,7	14,1	0,2	6,2	1,0	.,.	0,3	6,0	.,.	0,6	.,.	0,4
Unigene0000568	374	374	T	C	SNP	.	858.31	.|.	.|.	.|.	0|0	1|1	.|.	.|.	1|1	1|1	1|1	1|1	.|.	.|.	.|.	1|1	1|1	0|1	.|.	0|1	.,.	.,.	.,.	25,2	0,1	.,.	.,.	0,9	0,2	0,2	0,1	.,.	.,.	.,.	0,2	0,1	20,6	.,.	6,1
Unigene0000568	467	468	AT	-	Deletion	.	463.66	.|.	1|1	.|.	0|0	.|.	1|1	.|.	0|0	.|.	.|.	1|1	.|.	1|1	.|.	1|1	.|.	0|1	1|1	0|0	.,.	0,3	.,.	30,1	.,.	0,1	.,.	10,0	.,.	.,.	0,1	.,.	0,2	.,.	0,2	.,.	26,4	0,1	4,0
Unigene0000568	984	984	C	T	SNP	.	1433.58	.|.	.|.	1|1	0|1	1|1	1|1	1|1	0|0	1|1	.|.	1|1	1|1	.|.	1|1	.|.	1|1	0|1	.|.	0|1	.,.	.,.	0,1	19,10	0,1	0,2	0,2	12,0	0,5	.,.	0,3	0,2	.,.	0,6	.,.	0,2	11,3	.,.	3,4
Unigene0000568	999	999	T	C	SNP	.	1182.43	.|.	.|.	1|1	0|1	1|1	1|1	1|1	0|0	1|1	.|.	0|1	1|1	.|.	1|1	.|.	1|1	0|1	.|.	0|1	.,.	.,.	0,1	21,12	0,1	0,1	0,2	12,0	0,5	.,.	2,1	0,3	.,.	0,6	.,.	0,2	10,1	.,.	3,5
Unigene0000568	1670	1670	T	A	SNP	.	538.28	.|.	1|1	.|.	0|0	.|.	1|1	.|.	0|0	1|1	1|1	.|.	.|.	1|1	1|1	.|.	.|.	0|0	.|.	0|0	.,.	0,5	.,.	21,0	.,.	0,2	.,.	5,0	0,2	0,3	.,.	.,.	0,1	0,1	.,.	.,.	9,0	.,.	2,0
Unigene0000570	983	983	C	G	SNP	.	461.24	.|.	0|0	1|1	.|.	.|.	1|1	.|.	.|.	.|.	.|.	1|1	.|.	0|0	1|1	0|0	.|.	1|1	.|.	1|1	.,.	7,0	0,1	.,.	.,.	0,2	.,.	.,.	.,.	.,.	0,1	.,.	8,0	0,4	5,0	.,.	0,2	.,.	0,3
Unigene0000572	371	371	T	A	SNP	.	1842.89	1|1	1|1	0|0	0|1	0|0	.|.	0|1	1|1	0|0	0|1	1|1	0|0	1|1	0|1	.|.	1|1	1|1	1|1	.|.	0,8	0,3	1,0	4,5	4,0	.,.	2,4	0,8	2,0	1,1	0,2	1,0	0,4	5,7	.,.	0,2	0,1	0,2	.,.
Unigene0000572	1628	1628	A	G	SNP	.	1164.82	1|1	0|1	0|0	0|1	1|1	.|.	0|0	1|1	0|0	.|.	0|1	1|1	1|1	0|1	0|1	0|0	0|1	1|1	0|1	0,6	2,5	3,0	3,1	0,1	.,.	4,0	0,5	5,0	.,.	2,3	0,2	0,2	2,2	4,3	3,0	3,2	0,2	3,1
Unigene0000582	1260	1260	T	C	SNP	.	1071.85	1|1	1|1	.|.	0|1	.|.	0|1	1|1	1|1	1|1	0|1	1|1	1|1	1|1	0|1	0|1	.|.	1|1	1|1	0|1	0,1	0,1	.,.	1,2	.,.	1,2	.	0,3	0,1	1,2	0,2	0,3	0,2	1,3	1,3	.,.	0,1	0,1	1,1
Unigene0000587	382	382	A	G	SNP	.	2622.11	0|0	0|1	1|1	0|1	0|1	0|1	1|1	0|0	1|1	1|1	0|1	0|1	0|1	1|1	1|1	0|1	0|1	1|1	0|1	17,0	7,2	0,6	4,1	1,3	1,4	0,3	4,1	0,6	0,5	2,2	1,2	2,3	0,7	0,8	1,4	6,4	0,4	6,3
Unigene0000588	322	322	A	T	SNP	.	270.87	.|.	1|1	.|.	1|1	0|0	1|1	0|0	0|0	1|1	.|.	1|1	0|0	.|.	1|1	1|1	.|.	.|.	0|0	.|.	.,.	0,1	.,.	0,2	16,0	0,1	1,0	9,0	0,1	.,.	0,1	51,2	.,.	0,1	0,1	.,.	.,.	1,0	.,.
Unigene0000588	456	456	T	A	SNP	.	322.29	.|.	1|1	.|.	1|1	0|0	.|.	0|0	0|1	.|.	.|.	1|1	0|0	1|1	.|.	.|.	1|1	1|1	.|.	0|0	.,.	0,1	.,.	0,3	28,3	.,.	11,0	21,3	.,.	.,.	0,1	79,0	0,1	.,.	.,.	0,1	0,1	.,.	6,0
Unigene0000590	1092	1092	A	G	SNP	.	4638.43	1|1	1|1	0|1	0|1	1|1	1|1	0|1	1|1	0|1	1|1	0|1	1|1	0|1	1|1	1|1	0|1	0|1	1|1	0|1	0,15	0,14	3,4	2,8	0,6	0,11	4,8	0,6	1,8	0,6	2,3	0,6	2,4	0,6	0,2	5,5	2,6	0,7	6,5
Unigene0000591	956	956	C	T	SNP	.	11157.2	1|1	1|1	0|1	0|1	0|1	0|1	1|1	0|1	1|1	1|1	0|1	0|1	1|1	0|1	1|1	1|1	0|1	1|1	1|1	0,33	0,45	11,3	12,21	2,8	6,4	0,19	5,12	0,25	0,37	12,13	3,11	0,8	10,9	0,23	0,15	1,10	0,5	0,13
Unigene0000600	229	229	C	T	SNP	.	2641.98	1|1	1|1	0|1	0|1	0|1	0|1	0|1	1|1	1|1	1|1	0|1	.|.	0|1	1|1	1|1	1|1	0|1	1|1	0|1	0,5	0,8	3,2	1,9	1,1	2,7	1,3	0,6	0,5	0,1	1,1	.,.	1,1	0,8	0,8	0,2	3,1	0,1	9,4
Unigene0000608	279	279	T	-	Deletion	.	659.36	0|1	0|0	1|1	1|1	.|.	0|0	1|1	0|1	0|1	.|.	.|.	1|1	1|1	1|1	.|.	.|.	0|1	.|.	1|1	10,1	1,0	0,1	0,3	.,.	1,0	0,1	4,2	2,6	.,.	.,.	0,1	0,1	0,1	.,.	.,.	4,5	.,.	0,1
Unigene0000616	241	241	C	T	SNP	.	568.68	0|0	1|1	1|1	0|1	1|1	1|1	1|1	0|0	.|.	0|0	1|1	.|.	0|0	0|1	0|0	1|1	1|1	.|.	.|.	3,0	0,1	0,2	0,2	0,1	0,2	0,2	1,0	.,.	3,0	0,2	.,.	2,0	0,1	3,0	0,2	0,1	.,.	.,.
Unigene0000623	160	160	A	G	SNP	.	1163.63	.|.	0|0	1|1	0|1	1|1	1|1	1|1	.|.	0|1	.|.	1|1	0|0	1|1	1|1	1|1	.|.	0|1	0|1	0|0	.,.	7,0	0,3	1,4	0,2	0,1	0,4	.,.	4,2	.,.	0,5	1,0	0,2	0,4	0,4	.,.	1,2	2,1	1,0
Unigene0000632	184	184	G	A	SNP	.	2373.77	1|1	1|1	1|1	0|1	0|1	1|1	0|1	.|.	0|1	1|1	1|1	0|1	0|1	0|1	1|1	0|1	1|1	0|1	1|1	0,5	0,2	0,1	10,5	2,1	0,2	1,3	.,.	1,2	0,3	0,4	6,2	11,4	13,6	0,4	4,2	0,4	1,2	0,9
Unigene0000638	787	787	A	G	SNP	.	3805.19	0|1	0|1	0|1	0|1	1|1	0|1	1|1	1|1	1|1	.|.	.|.	1|1	1|1	0|1	0|1	.|.	0|1	1|1	0|1	6,2	3,3	3,15	1,3	0,7	3,3	0,2	0,5	1,22	.,.	.,.	0,2	0,1	1,4	3,1	.,.	7,14	0,1	12,16
Unigene0000640	898	898	A	G	SNP	.	12423.2	1|1	0|1	0|1	0|1	0|1	0|1	0|1	1|1	0|1	0|1	0|1	0|1	1|1	0|1	1|1	1|1	0|1	1|1	0|1	0,59	17,30	5,13	6,6	1,4	2,7	1,8	0,11	4,17	11,5	3,12	2,12	0,8	13,20	1,35	0,15	7,33	0,8	8,41
Unigene0000640	1100	1100	C	T	SNP	.	1869.16	0|1	0|0	0|1	0|1	1|1	1|1	0|1	0|0	.|.	0|1	.|.	1|1	1|1	1|1	0|1	0|1	0|1	1|1	0|1	2,14	3,0	1,3	2,2	0,2	0,2	2,3	1,0	.,.	1,2	.,.	0,2	0,1	0,6	3,6	2,4	3,1	0,3	6,3
Unigene0000658	676	676	A	G	SNP	.	5550.19	1|1	0|1	0|1	0|1	0|0	0|1	0|0	1|1	0|1	1|1	0|1	0|0	1|1	0|1	1|1	0|1	0|1	1|1	0|1	0,20	11,0	17,13	54,8	32,0	11,8	26,0	0,9	9,14	0,4	47,5	23,0	0,1	27,20	0,16	13,4	10,9	0,4	17,11
Unigene0000668	520	520	A	C	SNP	.	4669.61	0|1	0|1	0|1	0|1	0|1	1|1	0|1	0|1	1|1	1|1	0|1	1|1	1|1	0|1	0|1	1|1	0|1	1|1	0|1	9,17	3,11	4,8	5,5	1,3	0,7	1,1	3,13	0,5	0,4	3,2	0,2	0,3	6,10	1,5	0,2	11,5	0,3	2,6
Unigene0000668	811	811	C	T	SNP	.	4171.57	1|1	0|1	1|1	0|1	0|1	1|1	1|1	0|1	0|1	0|1	0|1	0|1	0|1	1|1	1|1	0|1	0|1	0|1	0|1	0,7	1,7	0,2	3,4	3,8	0,6	0,19	1,4	5,6	1,6	8,7	5,1	1,4	0,6	0,8	1,6	6,1	2,5	2,9
Unigene0000668	866	866	G	T	SNP	.	3375.7	1|1	0|1	1|1	0|1	0|1	1|1	0|1	1|1	0|1	1|1	1|1	0|1	0|0	0|1	0|1	0|1	0|1	0|1	0|1	0,8	8,4	0,2	8,6	7,5	0,7	10,12	0,3	4,8	0,8	0,16	2,4	8,0	3,2	5,3	4,5	1,5	5,2	7,2
Unigene0000668	1052	1052	C	T	SNP	.	1794.82	1|1	0|0	0|1	1|1	0|1	1|1	1|1	1|1	0|1	1|1	0|1	0|1	1|1	1|1	1|1	1|1	0|1	1|1	.|.	0,2	1,0	2,1	0,1	3,1	0,1	0,6	0,4	3,6	0,4	1,6	1,2	0,2	0,3	0,1	.	6,2	0,3	.,.
Unigene0000669	329	329	A	T	SNP	.	2576.75	0|0	1|1	1|1	0|0	1|1	0|1	1|1	0|0	1|1	1|1	0|1	0|1	1|1	0|1	1|1	.|.	0|1	0|0	0|1	2,0	0,12	0,2	2,0	0,4	2,3	1,9	3,0	0,3	0,10	1,6	1,2	0,1	1,4	0,4	.,.	1,2	3,0	3,8
Unigene0000669	581	581	T	C	SNP	.	3860.57	1|1	0|1	0|1	1|1	1|1	0|1	0|1	1|1	1|1	0|1	0|1	1|1	0|0	0|1	0|1	0|1	1|1	1|1	1|1	0,8	9,7	4,1	0,1	0,4	1,1	4,5	0,1	0,1	11,14	6,14	0,1	1,0	2,12	3,3	7,1	0,8	0,2	0,20
Unigene0000669	941	941	G	T	SNP	.	2047.77	.|.	0|1	1|1	1|1	1|1	0|1	1|1	.|.	.|.	0|1	0|1	1|1	1|1	0|0	0|1	1|1	1|1	1|1	1|1	.,.	1,4	0,1	0,3	0,4	2,2	0,3	.,.	.,.	1,6	3,2	0,7	0,6	2,0	1,5	0,1	0,1	0,3	0,1
Unigene0000669	942	942	A	G	SNP	.	2047.77	.|.	0|1	1|1	1|1	1|1	0|1	1|1	.|.	.|.	0|1	0|1	1|1	1|1	0|0	0|1	1|1	1|1	1|1	1|1	.,.	1,4	0,1	0,3	0,5	2,2	0,3	.,.	.,.	1,6	3,2	0,7	0,6	2,0	1,6	0,1	0,1	0,3	0,1
Unigene0000687	1291	1291	A	G	SNP	.	373.69	1|1	1|1	1|1	1|1	0|0	0|0	0|0	0|0	.|.	0|0	1|1	0|1	0|0	0|1	.|.	0|0	.|.	1|1	.|.	0,1	0,2	0,2	0,1	2,0	2,0	1,0	1,0	.,.	3,0	0,1	1,2	4,0	1,1	.,.	1,0	.,.	0,1	.,.
Unigene0000689	479	479	A	G	SNP	.	1950.31	1|1	0|1	1|1	1|1	0|0	0|1	0|1	1|1	0|1	.|.	1|1	0|0	0|1	1|1	1|1	1|1	.|.	0|0	1|1	0,4	12,5	0,1	0,8	3,0	5,10	1,1	0,2	15,4	.,.	0,3	4,0	21,7	0,4	0,1	0,3	.,.	7,0	0,2
Unigene0000689	1746	1746	A	T	SNP	.	6523.86	1|1	0|1	1|1	1|1	.|.	0|1	1|1	1|1	0|1	.|.	0|1	1|1	0|1	1|1	0|1	0|1	0|0	1|1	0|1	0,16	6,9	0,1	0,20	.,.	5,18	0,2	0,6	5,12	.,.	15,9	0,4	3,17	0,20	4,20	1,6	5,0	0,5	2,2
Unigene0000712	67	67	C	T	SNP	.	1089.1	0|0	0|1	0|1	1|1	0|1	0|1	1|1	0|0	1|1	1|1	1|1	0|1	1|1	0|1	1|1	1|1	1|1	0|1	.|.	6,0	10,2	4,4	0,2	2,1	1,3	0,2	3,0	0,2	0,1	0,1	1,1	0,4	1,1	0,3	0,1	0,2	1,1	.,.
Unigene0000715	260	260	A	G	SNP	.	2324.36	1|1	0|1	0|1	0|1	0|0	1|1	0|0	1|1	0|1	0|1	1|1	0|0	1|1	0|1	0|1	0|1	1|1	1|1	1|1	0,6	9,5	3,1	14,3	5,0	0,4	12,0	0,7	13,6	2,2	0,2	1,0	0,3	14,3	1,2	3,1	0,6	0,6	0,4
Unigene0000715	1175	1175	C	T	SNP	.	4860.11	0|1	0|1	1|1	1|1	1|1	1|1	1|1	0|1	0|1	1|1	0|1	1|1	0|1	1|1	0|1	0|1	0|1	1|1	1|1	4,8	1,9	0,6	0,9	0,3	0,7	1,20	5,8	2,9	0,5	1,3	0,2	2,3	2,20	3,5	1,8	2,4	0,2	0,5
Unigene0000715	1856	1856	T	G	SNP	.	2841.46	1|1	0|1	1|1	1|1	0|1	1|1	0|0	.|.	0|1	1|1	0|1	0|1	0|1	1|1	0|1	0|0	0|1	1|1	1|1	0,1	3,6	0,1	0,1	2,6	0,2	5,0	.,.	2,3	0,7	1,4	2,4	1,3	0,10	1,3	2,0	1,7	0,3	0,6
Unigene0000715	1863	1863	G	C	SNP	.	2932.68	1|1	0|1	1|1	1|1	0|1	1|1	0|0	.|.	0|1	1|1	0|1	0|1	0|1	1|1	0|1	0|0	0|1	1|1	1|1	0,1	3,6	0,1	0,1	2,6	0,3	5,0	.,.	2,3	0,7	1,3	2,5	1,3	0,9	1,3	2,0	1,8	0,3	0,5
Unigene0000723	103	103	G	A	SNP	.	2156.44	1|1	0|1	0|0	0|0	0|1	0|1	1|1	1|1	1|1	1|1	1|1	1|1	0|1	0|1	1|1	1|1	1|1	0|0	.|.	0,8	7,5	2,0	6,0	2,1	2,4	0,3	0,8	0,3	0,5	0,3	0,2	4,6	6,5	0,2	0,1	0,6	3,0	.,.
Unigene0000723	1362	1362	G	T	SNP	.	1413.78	1|1	0|1	0|0	0|1	.|.	.|.	1|1	1|1	0|0	1|1	.|.	.|.	0|0	0|1	.|.	.|.	1|1	1|1	1|1	0,4	2,5	1,0	3,4	.,.	.,.	0,2	0,1	1,0	0,1	.,.	.,.	2,0	2,4	.,.	.,.	0,12	0,2	0,3
Unigene0000723	1396	1396	A	T	SNP	.	2132.86	.|.	0|1	0|1	0|1	.|.	0|1	1|1	.|.	0|0	1|1	.|.	.|.	0|0	0|1	1|1	.|.	1|1	1|1	1|1	.,.	6,7	2,4	7,8	.,.	5,2	0,3	.,.	2,0	0,4	.,.	.,.	6,0	5,4	0,1	.,.	0,11	0,4	0,5
Unigene0000724	290	290	C	T	SNP	.	5963.07	0|1	1|1	1|1	0|1	1|1	0|1	0|1	0|1	0|1	0|1	0|1	1|1	0|1	1|1	1|1	0|1	1|1	0|1	1|1	6,3	0,32	1,7	11,13	0,8	2,7	1,9	1,4	1,10	3,18	2,2	0,8	1,8	0,10	0,9	1,7	0,8	2,4	0,11
Unigene0000726	163	163	C	T	SNP	.	6995.24	0|0	0|1	0|1	1|1	0|1	0|1	0|1	0|1	1|1	1|1	1|1	1|1	1|1	0|1	1|1	1|1	0|1	1|1	0|1	9,0	13,14	2,5	1,20	2,13	5,4	7,11	11,2	0,16	0,2	0,8	0,11	0,5	12,3	0,3	0,6	10,20	0,17	9,16
Unigene0000727	224	224	G	T	SNP	.	24675.4	1|1	0|1	0|1	0|1	0|1	1|1	0|1	1|1	1|1	1|1	1|1	0|1	1|1	1|1	1|1	0|1	1|1	1|1	1|1	0,64	13,37	6,40	9,52	3,21	0,26	6,33	0,22	0,19	0,46	0,45	5,14	0,16	0,72	0,45	4,30	0,44	0,6	0,36
Unigene0000729	347	347	A	G	SNP	.	4917.32	0|1	1|1	0|1	0|1	0|1	1|1	0|1	0|1	1|1	1|1	0|1	0|1	1|1	0|1	1|1	0|1	0|1	0|1	0|1	11,7	0,21	2,1	2,10	3,1	0,5	5,6	4,2	0,12	0,6	2,7	4,4	0,9	7,14	0,12	4,4	2,9	1,2	4,4
Unigene0000729	1194	1194	G	A	SNP	.	3171.44	.|.	0|1	0|1	0|1	1|1	0|1	0|1	1|1	0|1	0|0	0|1	1|1	1|1	0|1	0|1	1|1	0|1	1|1	0|1	.,.	9,6	2,5	8,11	0,5	4,8	2,7	0,10	1,6	5,0	2,6	0,7	0,3	8,3	6,2	0,5	4,2	0,2	5,1
Unigene0000729	1222	1222	G	C	SNP	.	3111.21	.|.	0|1	1|1	0|1	1|1	0|1	1|1	1|1	0|1	0|1	1|1	1|1	1|1	0|1	0|1	1|1	1|1	1|1	0|1	.,.	6,7	0,5	7,7	0,4	2,8	0,8	0,8	1,2	3,3	0,7	0,8	0,2	2,5	1,2	0,5	0,1	0,1	2,2
Unigene0000734	1379	1379	A	G	SNP	.	3679	0|1	0|0	1|1	1|1	1|1	1|1	0|0	0|1	1|1	0|1	1|1	1|1	0|0	0|0	.|.	0|0	1|1	1|1	1|1	9,11	0,0	0,4	0,6	0,3	0,9	1,0	16,8	0,16	13,11	0,9	0,2	0,0	2,0	.,.	1,0	0,3	0,3	0,9
Unigene0000734	5477	5477	A	C	SNP	.	2051.8	1|1	1|1	.|.	1|1	0|1	.|.	1|1	1|1	.|.	1|1	1|1	0|1	.|.	.|.	.|.	1|1	.|.	0|0	0|1	0,8	0,5	.,.	0,3	1,5	.,.	0,1	0,21	.,.	0,2	0,1	1,1	.,.	.,.	.,.	0,2	.,.	1,0	1,0
Unigene0000747	667	667	C	T	SNP	.	996.97	1|1	1|1	0|1	1|1	1|1	0|1	1|1	1|1	0|1	0|1	0|0	0|0	0|0	0|1	0|1	1|1	0|1	0|0	0|0	0,2	0,2	2,1	0,1	0,1	3,1	0,3	0,7	1,1	3,1	3,0	2,0	2,0	3,2	3,3	0,2	6,2	4,0	2,0
Unigene0000749	189	189	G	C	SNP	.	3495.43	0|1	0|1	1|1	1|1	1|1	1|1	0|1	0|1	1|1	0|1	.|.	1|1	1|1	0|0	0|1	0|1	1|1	0|1	1|1	1,1	2,8	0,1	0,6	0,1	0,2	3,11	12,5	0,11	11,25	.,.	0,1	0,1	1,0	2,13	3,10	0,1	2,5	0,3
Unigene0000749	209	209	T	A	SNP	.	4639.15	0|1	0|1	1|1	1|1	1|1	0|1	0|1	0|1	0|1	0|1	1|1	.|.	1|1	0|1	0|1	0|1	1|1	0|1	1|1	1,1	7,6	0,1	0,10	0,2	1,3	3,21	11,15	2,8	12,30	0,2	.,.	0,2	1,3	10,14	3,10	0,1	1,6	0,4
Unigene0000750	115	115	T	C	SNP	.	1615.42	1|1	0|0	0|0	0|1	1|1	0|1	0|1	1|1	0|1	1|1	1|1	1|1	1|1	1|1	0|1	0|0	0|1	0|0	1|1	0,2	13,0	6,0	10,5	0,6	5,1	11,3	0,1	1,7	0,6	0,2	0,4	0,2	0,4	1,1	2,0	8,3	2,0	1,3
Unigene0000750	321	321	T	C	SNP	.	3595.93	1|1	0|1	0|1	1|1	0|1	0|1	1|1	1|1	0|1	0|1	1|1	0|1	1|1	0|1	0|1	1|1	0|1	0|1	0|1	0,6	7,12	1,2	0,12	4,14	4,2	0,5	0,2	1,1	5,4	0,2	2,3	0,5	5,2	2,3	0,2	3,2	2,3	1,5
Unigene0000751	506	506	G	A	SNP	.	1620.25	0|1	0|0	1|1	.|.	1|1	1|1	1|1	0|0	0|1	0|0	0|1	.|.	0|1	1|1	0|1	0|1	0|0	1|1	.|.	21,5	2,0	0,2	.,.	0,4	0,1	0,11	19,0	4,1	9,0	3,2	.,.	2,5	0,17	7,4	2,2	4,0	0,3	.,.
Unigene0000764	225	225	A	C	SNP	.	1875.36	0|1	0|1	1|1	1|1	0|1	0|1	0|0	0|0	0|1	1|1	1|1	1|1	1|1	0|1	0|0	.|.	1|1	0|1	0|0	1,0	2,3	0,6	0,3	2,5	1,5	1,0	5,0	5,10	0,9	0,5	0,1	0,2	2,3	5,0	.,.	0,1	2,1	5,0
Unigene0000768	954	954	G	A	SNP	.	5030.63	0|1	0|1	1|1	1|1	1|1	0|1	0|1	1|1	1|1	1|1	1|1	0|1	1|1	1|1	1|1	1|1	0|1	0|1	1|1	1,5	2,11	0,4	0,8	0,5	1,5	2,3	0,1	0,5	0,8	0,6	1,5	0,2	0,8	1,7	0,4	2,10	0,1	0,7
Unigene0000781	93	93	C	G	SNP	.	2102.09	1|1	1|1	.|.	0|1	.|.	1|1	0|0	1|1	0|0	1|1	0|0	.|.	0|0	.|.	1|1	1|1	0|1	0|0	1|1	0,15	0,10	.,.	1,9	.,.	0,2	8,0	0,16	2,0	0,1	6,0	.,.	1,0	.,.	0,2	0,2	5,2	2,0	0,1
Unigene0000781	1681	1681	C	G	SNP	.	4563.34	1|1	0|1	1|1	0|1	0|0	0|1	1|1	1|1	0|1	1|1	0|1	0|1	1|1	1|1	1|1	1|1	0|1	1|1	0|1	0,13	11,21	0,3	13,7	8,0	10,4	0,6	0,2	5,11	0,8	7,9	4,1	0,8	0,15	0,2	0,1	4,6	0,8	2,7
Unigene0000783	976	976	A	C	SNP	.	1373.08	1|1	1|1	.|.	1|1	1|1	0|0	1|1	1|1	0|0	0|0	.|.	1|1	0|0	0|1	.|.	1|1	0|1	0|1	.|.	0,6	0,2	.,.	0,4	0,2	1,0	0,6	0,7	1,0	2,0	.,.	0,2	2,0	4,5	.,.	0,2	1,2	3,1	.,.
Unigene0000783	1179	1179	C	T	SNP	.	763.68	0|1	1|1	1|1	.|.	.|.	1|1	1|1	0|1	.|.	0|0	.|.	1|1	0|0	0|1	.|.	1|1	0|0	0|0	0|0	5,1	0,1	0,1	.,.	.,.	0,3	0,6	1,6	.,.	3,0	.,.	0,1	7,0	3,2	.,.	0,2	4,0	5,0	1,0
Unigene0000801	164	164	A	T	SNP	.	4710.85	1|1	0|1	1|1	1|1	0|1	1|1	0|1	1|1	0|1	0|1	1|1	0|1	0|1	0|1	0|1	0|1	0|1	0|1	0|1	0,10	12,6	0,11	0,19	3,6	0,5	3,5	0,3	12,4	4,8	0,10	6,9	4,7	7,14	13,7	5,3	13,6	1,5	1,4
Unigene0000804	119	119	G	A	SNP	.	901.1	.|.	1|1	.|.	1|1	.|.	1|1	0|1	.|.	0|0	0|0	0|1	0|0	1|1	0|1	0|1	0|0	1|1	.|.	1|1	.,.	0,3	.,.	0,4	.,.	0,2	1,1	.,.	1,0	2,0	6,1	3,0	0,1	5,2	2,2	3,0	0,2	.,.	0,5
Unigene0000811	1817	1817	C	T	SNP	.	11789.6	1|1	1|1	1|1	0|1	0|1	1|1	0|1	1|1	0|1	0|1	0|1	0|1	1|1	0|1	1|1	1|1	0|1	0|1	0|1	0,11	2,57	0,12	6,9	3,7	0,11	4,22	0,70	2,13	3,18	3,3	2,13	0,16	1,13	0,3	0,14	2,11	3,9	2,3
Unigene0000811	2248	2248	T	C	SNP	.	12161.9	1|1	1|1	1|1	1|1	1|1	1|1	1|1	0|1	1|1	0|1	1|1	0|1	0|1	1|1	1|1	1|1	0|1	0|1	0|1	0,18	0,38	0,14	1,17	3,40	0,9	0,30	113,15	1,33	9,13	1,16	5,13	13,11	0,30	0,2	0,23	5,12	16,12	2,10
Unigene0000818	383	383	A	G	SNP	.	2319.65	1|1	0|1	0|0	0|0	.|.	0|1	0|1	1|1	0|1	0|1	0|1	.|.	1|1	0|1	1|1	1|1	0|0	1|1	0|0	1,15	23,5	1,0	15,1	.,.	12,4	23,18	0,4	0,2	2,3	14,2	.,.	0,2	2,4	0,3	0,2	1,0	0,5	1,0
Unigene0000823	631	631	A	G	SNP	.	1251.78	1|1	1|1	0|1	0|1	0|1	0|1	0|1	1|1	0|1	.|.	0|1	1|1	1|1	0|1	1|1	.|.	0|1	0|0	0|1	0,2	0,2	3,2	2,2	2,1	4,1	4,1	0,1	1,2	.,.	1,1	0,2	0,1	4,2	0,1	.,.	3,5	3,0	4,12
Unigene0000836	295	295	C	G	SNP	.	2761	1|1	1|1	0|1	0|1	0|1	0|1	0|1	1|1	0|1	1|1	0|1	0|1	.|.	0|1	1|1	0|1	0|1	0|1	1|1	0,5	0,9	2,4	4,8	2,2	1,8	6,3	0,4	3,7	0,1	1,3	2,1	.,.	10,8	0,1	1,1	3,3	1,2	0,6
Unigene0000842	923	923	C	T	SNP	.	15613.6	1|1	1|1	0|1	0|1	0|1	1|1	0|1	1|1	0|1	1|1	0|1	0|1	1|1	0|1	1|1	1|1	1|1	1|1	1|1	0,19	0,41	10,31	10,8	28,16	0,21	19,22	0,41	34,36	0,33	18,7	8,8	0,57	13,16	0,5	0,11	2,22	0,19	0,14
Unigene0000842	2216	2216	T	G	SNP	.	14345.9	0|1	0|1	0|1	0|1	0|1	0|1	1|1	1|1	0|1	1|1	0|1	0|1	1|1	1|1	0|1	1|1	0|1	0|1	1|1	1,9	3,16	4,28	6,16	3,37	1,5	1,22	2,46	7,52	0,24	2,19	2,22	1,45	1,25	1,3	0,5	1,13	1,7	0,6
Unigene0000855	448	448	A	G	SNP	.	4399.98	.|.	0|1	0|1	0|1	0|1	1|1	0|1	.|.	0|0	1|1	0|1	0|0	1|1	1|1	0|0	1|1	1|1	1|1	1|1	.,.	27,23	11,19	8,4	9,1	0,1	12,16	.,.	55,1	0,11	35,17	4,0	0,5	0,8	8,0	0,7	0,6	0,3	0,10
Unigene0000855	1631	1631	T	A	SNP	.	2579.11	.|.	0|1	0|1	1|1	1|1	1|1	0|1	1|1	0|1	1|1	0|1	1|1	1|1	.|.	0|1	1|1	1|1	1|1	1|1	.,.	7,4	4,3	0,1	1,4	0,5	5,3	0,6	14,3	0,1	10,5	0,2	0,1	.,.	8,9	0,1	0,4	0,3	0,14
Unigene0000862	279	279	G	A	SNP	.	1036.72	.|.	1|1	1|1	1|1	.|.	0|0	1|1	1|1	1|1	0|1	.|.	.|.	.|.	0|1	1|1	1|1	0|1	0|0	0|1	.,.	0,2	0,1	0,4	.,.	2,0	0,1	0,4	0,2	5,2	.,.	.,.	.,.	3,4	0,1	0,3	3,3	3,0	6,1
Unigene0000862	507	507	A	G	SNP	.	707.43	1|1	0|1	0|0	1|1	0|1	0|1	.|.	1|1	0|0	1|1	.|.	0|0	0|1	0|1	.|.	1|1	0|0	1|1	1|1	0,1	1,1	1,0	0,2	1,2	1,2	.,.	0,2	2,0	.	.,.	1,0	3,3	1,3	.,.	0,1	2,0	0,1	0,1
Unigene0000862	1007	1007	T	-	Deletion	.	2495.1	0|1	1|1	1|1	0|1	1|1	0|1	1|1	1|1	1|1	0|0	1|1	0|0	1|1	0|1	0|1	1|1	1|1	1|1	1|1	2,6	0,7	0,4	1,4	0,3	1,3	0,3	0,3	0,4	2,0	0,5	2,0	0,7	1,8	2,2	0,5	0,5	0,1	0,1
Unigene0000862	1049	1049	A	G	SNP	.	4295.17	0|1	0|1	1|1	0|1	1|1	0|1	1|1	0|1	0|1	1|1	1|1	0|1	0|1	0|1	0|1	0|1	1|1	1|1	1|1	5,16	4,5	0,7	5,6	0,2	5,6	0,5	2,5	1,7	0,8	0,4	2,3	1,8	5,9	1,10	1,1	0,9	0,3	0,6
Unigene0000862	1178	1178	A	C	SNP	.	3386.14	0|1	0|1	1|1	0|1	0|1	0|1	1|1	1|1	0|1	1|1	.|.	0|1	1|1	0|1	0|1	0|1	1|1	1|1	1|1	3,8	5,2	0,10	2,8	1,1	7,4	0,5	0,4	2,5	0,4	.,.	1,4	0,5	8,11	2,5	1,2	0,10	0,4	0,2
Unigene0000862	1197	1197	A	G	SNP	.	1899.84	0|1	0|1	1|1	0|1	0|1	0|1	1|1	1|1	0|1	0|1	.|.	0|1	1|1	0|1	0|0	1|1	1|1	1|1	1|1	4,3	3,1	0,7	4,2	1,1	7,4	0,2	0,1	2,4	1,2	.,.	1,3	0,2	6,5	2,0	0,1	0,7	0,3	0,2
Unigene0000866	85	85	T	C	SNP	.	3250.4	.|.	1|1	.|.	1|1	0|0	1|1	.|.	1|1	1|1	.|.	0|1	0|0	0|0	0|0	.|.	1|1	0|1	.|.	0|1	.,.	0,5	.,.	0,4	48,0	0,19	.,.	0,4	0,8	.,.	54,7	20,0	3,0	184,0	.,.	0,1	147,35	.,.	152,31
Unigene0000866	166	166	T	C	SNP	.	8607.96	.|.	1|1	.|.	1|1	0|0	1|1	.|.	0|0	1|1	1|1	0|1	0|0	0|0	0|0	1|1	1|1	0|1	.|.	0|1	.,.	0,22	.,.	0,23	61,0	0,38	.,.	26,0	1,8	0,1	50,17	31,0	15,0	221,0	0,1	0,3	162,70	.,.	175,84
Unigene0000866	424	424	T	C	SNP	.	33952.4	1|1	1|1	0|1	1|1	0|1	1|1	1|1	0|1	0|1	.|.	0|1	0|1	1|1	0|1	0|1	0|1	0|1	1|1	1|1	0,91	0,164	11,4	7,48	15,4	0,75	0,1	15,47	11,43	.,.	12,24	9,1	0,39	33,28	1,9	2,1	19143	0,1	10154
Unigene0000866	532	532	T	G	SNP	.	15025.6	1|1	0|1	0|1	0|1	0|1	1|1	0|0	1|1	1|1	.|.	1|1	0|1	0|1	0|1	0|1	1|1	1|1	1|1	1|1	0,21	77,21	9,2	11,42	4,14	0,21	1,0	0,28	1,17	.,.	0,6	2,7	25,5	12,48	1,1	0,4	0,67	0,4	0,74
Unigene0000866	595	595	T	C	SNP	.	3290.77	.|.	1|1	1|1	0|1	.|.	.|.	0|0	.|.	1|1	.|.	.|.	1|1	1|1	1|1	.|.	0|0	1|1	1|1	1|1	.,.	0,24	0,2	21,11	.,.	.,.	2,0	.,.	0,4	.,.	.,.	0,1	0,9	0,15	.,.	5,0	0,7	0,1	0,10
Unigene0000866	1205	1205	G	A	SNP	.	3514.6	1|1	1|1	.|.	.|.	0|0	1|1	.|.	1|1	1|1	.|.	0|0	0|0	1|1	0|0	.|.	.|.	0|1	.|.	0|1	0,32	0,5	.,.	.,.	28,0	0,12	.,.	0,1	0,4	.,.	39,3	13,0	0,19	144,0	.,.	.,.	88,18	.,.	109,27
Unigene0000866	1743	1743	A	G	SNP	.	861.4	.|.	.|.	1|1	1|1	0|0	.|.	1|1	0|0	1|1	.|.	0|0	0|0	.|.	0|0	.|.	1|1	0|0	1|1	0|0	.,.	.,.	0,2	0,9	25,1	.,.	0,1	2,0	0,5	.,.	21,0	14,0	.,.	139,6	.,.	0,1	63,3	0,2	132,4
Unigene0000866	1750	1750	G	A	SNP	.	861.39	.|.	.|.	1|1	1|1	0|0	.|.	1|1	0|0	1|1	.|.	0|0	0|0	.|.	0|0	.|.	1|1	0|0	1|1	0|0	.,.	.,.	0,3	0,9	26,1	.,.	0,1	2,0	0,5	.,.	21,0	12,0	.,.	143,6	.,.	0,1	65,3	0,2	139,4
Unigene0000868	52	52	C	G	SNP	.	3567.26	1|1	0|0	0|1	1|1	0|1	1|1	0|0	1|1	1|1	1|1	0|1	0|1	1|1	0|1	1|1	1|1	1|1	1|1	1|1	0,5	22,1	8,5	0,29	1,1	0,11	8,0	0,8	0,1	0,3	9,3	3,2	0,6	17,2	0,6	0,4	0,3	0,1	0,7
Unigene0000868	75	75	A	G	SNP	.	5360.98	1|1	0|1	0|1	0|1	0|1	0|1	0|1	1|1	1|1	0|0	0|1	0|1	1|1	0|1	1|1	1|1	1|1	1|1	1|1	0,16	30,5	17,5	36,5	6,9	15,8	16,4	0,22	0,7	9,0	12,10	4,3	0,9	23,5	0,14	0,6	0,7	0,4	0,12
Unigene0000868	228	228	A	C	SNP	.	5961.23	1|1	0|1	0|1	0|1	0|1	0|1	0|1	1|1	1|1	0|1	0|1	0|1	1|1	0|1	1|1	.|.	1|1	1|1	1|1	0,32	29,8	10,1	25,6	8,9	9,14	17,6	0,26	0,5	5,5	10,13	2,8	0,3	17,7	0,6	.,.	0,5	0,10	0,8
Unigene0000868	249	249	C	T	SNP	.	5540.01	1|1	0|1	0|1	0|1	0|1	0|1	0|1	1|1	1|1	0|1	0|1	0|1	1|1	0|1	1|1	1|1	1|1	1|1	1|1	0,25	29,7	9,5	24,4	11,5	15,12	14,6	0,31	0,6	5,3	12,11	2,6	0,4	20,6	0,3	0,1	0,4	0,10	0,9
Unigene0000868	427	427	G	C	SNP	.	4347.78	0|0	1|1	1|1	0|1	1|1	1|1	1|1	0|0	0|1	0|1	0|1	1|1	0|0	0|1	0|0	0|0	0|0	0|0	0|0	16,0	1,18	0,14	2,15	0,4	1,18	0,18	16,0	2,1	3,8	1,13	0,7	6,0	3,19	5,0	2,0	2,0	3,0	1,0
Unigene0000869	1066	1066	T	C	SNP	.	7410.41	1|1	0|1	0|1	0|1	1|1	0|1	0|1	1|1	0|1	1|1	0|1	1|1	0|1	0|1	0|0	0|1	0|1	1|1	0|1	0,6	6,4	2,6	6,27	0,9	3,12	4,6	0,52	4,14	0,6	3,9	1,22	2,8	7,4	2,0	1,13	2,4	0,8	6,6
Unigene0000869	1523	1523	C	T	SNP	.	4388.17	1|1	0|0	0|1	1|1	1|1	1|1	0|0	1|1	0|0	1|1	1|1	1|1	0|1	0|0	0|1	1|1	0|1	1|1	0|1	0,1	4,0	1,13	.	0,25	0,6	8,0	0,12	4,0	0,3	0,1	0,11	3,2	2,0	2,3	0,22	3,3	0,1	3,3
Unigene0000869	1544	1544	G	A	SNP	.	3553.46	0|1	0|0	0|1	0|1	1|1	1|1	0|1	0|1	0|1	1|1	1|1	1|1	0|1	0|1	0|1	1|1	0|1	1|1	0|1	1,1	5,0	1,6	1,1	0,20	0,2	8,1	15,13	5,3	0,2	0,2	0,10	3,2	2,3	2,1	0,14	4,2	0,1	3,2
Unigene0000874	647	647	C	T	SNP	.	5469.51	0|0	0|1	0|1	1|1	0|1	0|1	0|1	0|1	1|1	0|1	1|1	1|1	0|1	1|1	1|1	1|1	1|1	1|1	1|1	2,0	2,12	2,5	0,8	1,4	2,2	3,7	2,14	1,22	1,9	1,3	0,3	1,3	0,9	0,12	0,15	0,9	0,3	0,5
Unigene0000874	1292	1292	A	G	SNP	.	5283.5	1|1	1|1	1|1	0|1	0|1	1|1	0|1	0|1	0|1	1|1	1|1	0|1	0|1	0|1	1|1	0|1	0|1	0|1	0|1	0,2	0,20	0,8	7,6	3,7	0,4	5,10	7,9	6,8	0,11	0,6	1,6	2,4	2,3	0,6	11,7	2,4	1,6	2,6
Unigene0000874	1304	1304	C	A	SNP	.	5514.65	1|1	1|1	1|1	0|1	0|1	1|1	0|1	0|1	0|1	1|1	1|1	0|1	1|1	0|1	1|1	0|1	0|1	0|1	0|1	0,3	0,18	0,7	5,7	3,5	0,3	5,11	6,10	6,11	0,11	0,7	1,4	0,4	2,4	0,7	9,8	1,3	1,6	2,4
Unigene0000874	1457	1457	G	A	SNP	.	1030.85	1|1	1|1	1|1	1|1	.|.	1|1	0|1	1|1	0|1	1|1	0|0	0|0	0|1	0|1	0|1	0|0	.|.	1|1	0|1	0,2	0,6	0,1	0,3	.,.	0,1	5,2	0,2	3,2	0,1	1,0	1,0	2,3	1,1	3,1	2,0	.,.	0,1	1,1
Unigene0000874	1461	1461	C	A	SNP	.	890.33	1|1	1|1	1|1	1|1	.|.	1|1	0|1	1|1	0|1	1|1	0|0	0|0	0|1	0|1	0|1	0|0	.|.	.|.	0|1	0,2	0,5	0,1	0,1	.,.	0,1	5,2	0,2	3,2	0,1	.	1,0	2,3	1,0	3,1	2,0	.,.	.,.	1,1
Unigene0000880	237	237	G	T	SNP	.	1807.25	1|1	0|1	1|1	1|1	0|1	0|0	0|1	1|1	1|1	1|1	1|1	1|1	0|0	0|1	0|0	0|1	0|1	.|.	0|1	0,10	4,4	0,2	0,2	6,2	1,0	2,5	0,4	0,1	0,1	0,2	0,3	2,0	10,2	2,0	4,1	2,4	.,.	1,3
Unigene0000903	285	285	A	G	SNP	.	3415.14	1|1	1|1	.|.	0|1	.|.	.|.	0|1	1|1	0|1	.|.	1|1	.|.	0|1	1|1	.|.	0|1	1|1	0|1	1|1	0,14	0,16	.,.	5,1	.,.	.,.	5,1	0,13	1,4	.,.	0,7	.,.	8,10	0,13	.,.	3,1	0,3	4,3	0,8
Unigene0000903	911	911	A	T	SNP	.	2647.87	1|1	1|1	0|0	1|1	.|.	.|.	1|1	0|1	1|1	.|.	0|0	0|0	1|1	0|0	1|1	1|1	0|0	1|1	1|1	0,10	0,12	2,0	0,3	.,.	.,.	0,2	1,6	0,5	.,.	13,0	1,0	0,16	10,0	0,6	0,5	1,0	0,1	0,10
Unigene0000904	292	292	A	T	SNP	.	1127.01	1|1	.|.	.|.	1|1	0|1	0|1	.|.	.|.	1|1	0|0	1|1	0|0	1|1	0|1	1|1	.|.	1|1	.|.	0|1	0,1	.,.	.,.	0,5	1,1	2,2	.,.	.,.	0,6	2,0	0,2	2,0	0,1	1,6	0,4	.,.	0,2	.,.	1,2
Unigene0000909	1088	1088	A	G	SNP	.	15965.9	0|1	0|1	0|1	0|1	1|1	0|1	1|1	0|1	0|1	1|1	0|1	0|1	0|1	0|1	0|1	1|1	1|1	0|1	1|1	8,18	10,33	8,32	8,25	0,28	1,11	0,33	10,10	8,25	1,35	4,44	1,10	5,20	9,49	3,36	0,18	1,34	8,3	1,23
Unigene0000910	54	54	T	A	SNP	.	519.05	1|1	0|1	0|0	0|0	1|1	.|.	1|1	.|.	.|.	.|.	.|.	.|.	1|1	1|1	1|1	.|.	0|1	.|.	0|1	0,2	5,1	5,0	8,0	0,1	.,.	0,1	.,.	.,.	.,.	.,.	.,.	0,1	0,7	0,1	.,.	20,2	.,.	3,1
Unigene0000910	353	353	C	T	SNP	.	1283.86	0|0	0|1	0|0	0|1	1|1	1|1	.|.	1|1	0|0	.|.	.|.	1|1	1|1	0|1	1|1	.|.	0|0	1|1	0|0	4,0	1,5	5,0	6,1	0,1	0,2	.,.	0,2	1,0	.,.	.,.	0,5	0,4	3,8	0,5	.,.	10,0	0,4	1,0
Unigene0000911	1285	1285	A	G	SNP	.	7585.13	0|1	0|1	1|1	0|1	1|1	0|1	1|1	1|1	1|1	1|1	0|1	1|1	0|1	1|1	0|1	0|1	1|1	1|1	1|1	14,7	11,18	0,7	13,25	0,10	3,14	0,16	0,15	0,12	0,12	5,14	0,5	4,3	0,23	2,3	2,7	0,3	0,5	0,1
Unigene0000919	1460	1460	C	T	SNP	.	4198.62	0|1	0|1	0|1	0|1	0|1	0|1	0|1	0|1	1|1	1|1	0|1	0|1	0|1	0|1	1|1	0|1	1|1	1|1	1|1	8,6	5,1	3,7	1,9	4,5	3,6	3,5	2,4	0,20	0,5	3,1	1,6	3,5	7,3	0,1	5,4	0,16	0,6	0,6
Unigene0000919	1683	1683	A	G	SNP	.	3579.5	0|1	0|0	0|1	0|1	1|1	1|1	0|1	0|1	1|1	0|1	0|1	0|0	0|1	0|1	1|1	0|1	1|1	1|1	1|1	13,4	17,3	1,6	7,7	0,4	0,2	12,7	4,3	0,14	1,7	12,1	8,0	5,8	13,5	0,3	2,1	0,16	0,9	0,4
Unigene0000921	941	941	G	A	SNP	.	1073.18	0|1	0|1	0|1	0|1	1|1	0|1	0|1	1|1	0|1	1|1	1|1	1|1	0|1	0|1	0|0	0|1	0|1	1|1	0|0	4,1	6,1	5,1	6,2	0,3	3,2	6,1	0,6	6,2	0,4	0,3	0,1	5,1	5,1	4,0	2,1	3,4	0,1	7,0
Unigene0000921	942	942	G	C	SNP	.	2116.86	1|1	1|1	0|1	0|1	1|1	0|1	0|1	1|1	0|1	1|1	1|1	1|1	0|1	0|1	0|0	0|1	0|1	1|1	0|0	0,5	0,7	5,1	2,6	0,3	1,4	6,1	0,6	6,2	0,4	0,3	0,1	3,3	5,1	4,0	2,1	3,4	0,1	7,0
Unigene0000921	967	967	T	G	SNP	.	1190.26	1|1	1|1	0|0	0|1	1|1	0|1	0|0	1|1	0|1	1|1	1|1	.|.	0|1	0|1	0|0	0|1	0|0	.|.	0|1	0,4	0,5	2,0	2,3	0,3	1,1	4,0	0,1	5,1	0,2	0,2	.,.	1,2	5,4	5,0	2,1	2,0	.,.	6,1
Unigene0000922	839	839	G	T	SNP	.	6565.98	1|1	0|1	0|1	1|1	1|1	0|1	0|1	0|1	0|0	0|1	1|1	1|1	0|1	1|1	0|1	0|1	0|1	0|1	0|1	1,22	4,21	4,15	0,12	0,12	7,13	3,11	9,10	18,1	6,2	0,3	0,11	12,1	0,21	11,3	2,1	21,9	5,4	15,5
Unigene0000923	22	22	A	T	SNP	.	505.8	.|.	0|0	0|0	1|1	1|1	1|1	0|1	0|0	.|.	1|1	0|1	.|.	0|0	1|1	1|1	0|1	.|.	0|0	0|1	.,.	2,0	6,0	0,1	0,1	0,2	1,3	1,0	.,.	0,2	5,1	.,.	1,0	0,1	0,1	1,2	.,.	1,0	1,1
Unigene0000923	174	174	C	G	SNP	.	3975.69	.|.	0|1	1|1	0|1	0|1	1|1	1|1	1|1	0|1	0|1	0|1	0|1	0|1	0|1	1|1	1|1	1|1	0|1	1|1	.,.	8,21	0,9	8,4	2,7	0,5	0,12	0,2	2,2	8,4	4,4	2,5	1,8	1,3	0,5	0,9	0,4	1,2	0,2
Unigene0000923	301	301	A	G	SNP	.	8116.16	0|0	0|1	1|1	0|1	0|1	1|1	0|1	0|1	0|1	1|1	0|1	0|1	1|1	1|1	0|1	0|1	1|1	1|1	1|1	5,0	4,48	0,21	8,8	6,23	0,11	5,20	5,2	10,3	0,22	8,8	3,10	0,2	0,5	2,8	5,16	0,8	0,4	0,6
Unigene0000923	1784	1784	A	G	SNP	.	5788.46	0|1	0|1	0|1	0|1	0|1	1|1	0|1	0|1	1|1	0|1	0|1	0|1	1|1	0|1	.|.	0|1	1|1	1|1	1|1	2,12	63,20	2,2	14,7	33,5	0,4	41,16	19,44	0,9	36,9	13,11	17,5	0,10	14,6	.,.	13,3	0,3	0,6	0,4
Unigene0000924	556	556	A	G	SNP	.	611.24	1|1	0|1	0|1	.|.	0|0	0|0	0|1	1|1	1|1	.|.	0|0	0|1	.|.	0|0	1|1	.|.	1|1	.|.	1|1	0,1	2,4	4,3	.,.	2,0	5,0	2,2	0,3	0,2	.,.	4,0	3,2	.,.	12,0	0,1	.,.	0,1	.,.	0,1
Unigene0000924	569	569	G	A	SNP	.	1044.37	1|1	0|1	0|1	1|1	0|1	0|1	0|1	1|1	1|1	.|.	0|0	0|1	1|1	0|0	1|1	.|.	1|1	.|.	1|1	0,2	4,4	5,5	0,2	2,3	6,1	2,3	0,2	0,3	.,.	4,0	3,2	0,1	14,0	0,1	.,.	0,3	.,.	0,1
Unigene0000933	244	244	A	G	SNP	.	1935.19	1|1	0|1	.|.	1|1	0|1	1|1	0|1	1|1	0|1	1|1	0|1	1|1	1|1	0|1	0|1	1|1	0|1	.|.	0|1	0,7	5,5	.,.	0,3	1,2	0,6	7,1	0,1	2,3	0,2	2,7	0,1	0,3	5,1	3,2	0,5	2,3	.,.	5,2
Unigene0000942	1299	1299	C	T	SNP	.	4021.75	1|1	1|1	1|1	1|1	1|1	1|1	1|1	1|1	0|1	0|1	1|1	1|1	0|1	0|1	1|1	1|1	0|1	.|.	0|1	0,10	0,9	0,10	0,13	0,2	0,4	0,4	0,2	1,4	2,4	0,9	0,3	2,2	4,10	0,2	0,3	9,8	.,.	5,6
Unigene0000942	1694	1694	A	T	SNP	.	932.7	.|.	1|1	.|.	0|1	.|.	0|1	.|.	.|.	1|1	.|.	1|1	.|.	1|1	0|1	1|1	.|.	0|1	1|1	0|1	.,.	.	.,.	6,2	.,.	3,1	.,.	.,.	0,2	.,.	0,1	.,.	0,1	5,1	0,1	.,.	2,6	0,2	8,4
Unigene0000944	254	254	G	T	SNP	.	1233.82	.|.	0|1	0|0	0|0	1|1	.|.	0|0	1|1	0|1	1|1	.|.	1|1	1|1	0|1	0|1	0|0	0|0	1|1	0|0	.,.	9,3	13,0	21,0	0,1	.,.	7,0	0,9	6,1	0,5	.,.	0,1	0,5	7,5	10,4	3,0	6,0	0,3	3,0
Unigene0000944	640	640	A	G	SNP	.	769.66	.|.	1|1	.|.	0|1	0|0	.|.	0|1	.|.	1|1	.|.	.|.	0|0	.|.	1|1	1|1	0|1	1|1	.|.	1|1	.,.	0,6	.,.	5,3	5,0	.,.	2,2	.,.	0,3	.,.	.,.	8,0	.,.	0,2	0,1	1,1	0,1	.,.	0,1
Unigene0000949	206	206	A	G	SNP	.	67410.1	1|1	0|1	1|1	1|1	0|1	0|1	1|1	1|1	0|1	0|1	0|1	0|1	0|1	0|1	0|1	1|1	0|1	0|1	0|1	0,63	137163	0,58	0,76	67146	42,46	0,229	0,130	90187	60176	39159	17,38	51122	46,85	43,36	0,59	84,30	60123	151,45
Unigene0000949	1087	1087	A	T	SNP	.	78260.2	1|1	1|1	0|1	0|1	1|1	0|1	0|1	1|1	1|1	0|1	0|1	1|1	1|1	0|1	0|1	0|1	1|1	1|1	1|1	0,97	0,155	40,52	28,59	0,149	39,65	88154	0,246	0,201	116112	47109	0,36	0,99	40,67	19,61	18,57	2,78	0,81	0,132
Unigene0000959	156	156	A	T	SNP	.	492.42	1|1	.|.	.|.	1|1	.|.	.|.	0|0	.|.	0|1	1|1	1|1	1|1	1|1	0|0	.|.	1|1	0|1	.|.	1|1	0,1	.,.	.,.	0,2	.,.	.,.	1,0	.,.	7,1	0,1	0,2	0,2	0,1	1,0	.,.	0,1	1,2	.,.	0,1
Unigene0000959	409	409	C	T	SNP	.	1285.29	0|0	.|.	.|.	1|1	.|.	.|.	1|1	0|0	1|1	0|0	.|.	.|.	.|.	1|1	.|.	.|.	1|1	.|.	1|1	4,0	.,.	.,.	0,5	.,.	.,.	0,4	2,0	0,6	1,0	.,.	.,.	.,.	0,5	.,.	.,.	0,9	.,.	0,5
Unigene0000967	56	56	A	T	SNP	.	3075.48	1|1	0|1	0|1	1|1	0|1	1|1	0|1	.|.	1|1	1|1	0|1	0|0	0|1	0|1	0|1	0|1	1|1	1|1	1|1	0,4	24,2	4,4	0,8	7,3	0,9	9,3	.,.	0,8	0,20	4,1	3,0	1,6	1,2	2,3	11,1	0,2	0,2	0,1
Unigene0000967	256	256	C	A	SNP	.	7741.74	1|1	0|1	0|1	1|1	0|1	1|1	0|1	1|1	1|1	1|1	0|1	0|1	0|1	0|1	0|1	0|0	1|1	1|1	1|1	0,9	32,9	4,6	0,14	3,4	0,15	15,8	0,16	0,22	0,44	13,11	5,4	2,3	3,2	2,8	12,1	0,7	0,8	0,8
Unigene0000967	855	855	T	C	SNP	.	5245.08	1|1	0|1	.|.	0|1	0|1	0|1	0|0	1|1	0|1	1|1	1|1	0|1	1|1	0|0	0|1	0|1	0|1	1|1	0|1	0,8	32,48	.,.	2,4	25,5	1,2	20,1	0,25	19,4	0,15	0,2	13,5	0,7	15,1	10,4	4,6	3,5	0,12	5,5
Unigene0000976	771	771	C	G	SNP	.	1799.84	0|0	0|1	0|0	1|1	0|1	0|1	0|1	1|1	0|1	1|1	0|1	0|1	0|1	1|1	1|1	1|1	0|1	0|1	0|1	3,0	4,8	2,0	0,5	1,1	8,1	1,5	0,3	1,1	0,3	6,1	1,2	3,1	0,7	0,4	0,2	2,4	1,1	4,1
Unigene0000979	691	691	A	G	SNP	.	1626.95	.|.	0|1	0|0	0|0	1|1	1|1	0|1	1|1	0|1	.|.	1|1	1|1	1|1	0|1	0|0	0|1	0|1	0|1	0|1	.,.	23,2	3,0	8,0	0,4	0,2	5,4	0,1	10,2	.,.	0,1	0,6	0,3	8,12	1,0	2,7	2,1	1,1	3,4
Unigene0000979	771	771	A	G	SNP	.	1096.96	.|.	0|0	0|1	0|0	1|1	1|1	0|1	.|.	0|1	.|.	1|1	1|1	1|1	0|1	0|0	0|1	0|1	1|1	0|1	.,.	28,1	2,1	4,0	0,1	0,2	6,2	.,.	7,1	.,.	0,1	0,9	0,1	7,7	1,0	4,4	1,1	0,1	2,3
Unigene0000979	813	813	C	T	SNP	.	1736.96	.|.	0|0	0|1	0|0	1|1	1|1	0|1	.|.	0|1	.|.	1|1	1|1	1|1	0|1	0|0	0|1	0|1	1|1	0|1	.,.	26,1	2,3	3,0	0,2	0,4	9,3	.,.	5,1	.,.	0,1	0,11	0,3	7,13	1,0	4,4	1,1	0,1	2,4
Unigene0000979	1341	1341	A	G	SNP	.	2202.47	.|.	0|0	.|.	0|0	0|1	1|1	0|1	1|1	0|1	0|0	.|.	1|1	0|1	1|1	.|.	1|1	1|1	1|1	1|1	.,.	3,0	.,.	3,0	2,8	0,1	3,5	0,1	3,4	1,0	.,.	0,3	1,7	0,18	.,.	0,5	0,2	0,1	0,7
Unigene0000979	2256	2256	T	C	SNP	.	1067.34	.|.	1|1	0|0	1|1	.|.	0|0	1|1	.|.	1|1	.|.	0|1	1|1	.|.	0|1	.|.	1|1	1|1	.|.	1|1	.,.	0,7	10,0	0,3	.,.	8,0	0,2	.,.	0,2	.,.	2,1	0,1	.,.	10,5	.,.	0,3	0,2	.,.	0,4
Unigene0000982	397	397	A	G	SNP	.	334.9	.|.	1|1	1|1	0|1	0|0	.|.	0|0	1|1	.|.	1|1	1|1	0|1	0|0	0|1	1|1	.|.	1|1	0|0	.|.	.,.	0,1	0,1	9,1	5,0	.,.	2,0	0,1	.,.	0,2	0,1	2,1	5,0	6,1	0,1	.,.	0,1	4,0	.,.
Unigene0000982	1081	1081	C	T	SNP	.	7894.17	1|1	1|1	0|1	0|1	0|1	0|1	0|1	1|1	1|1	0|1	1|1	0|1	1|1	0|1	0|1	0|1	0|1	0|1	0|1	0,18	0,21	1,4	3,22	6,3	4,6	2,6	0,2	0,9	4,19	0,13	2,3	0,13	3,21	15,17	5,5	2,7	2,8	3,4
Unigene0000986	248	248	A	G	SNP	.	5946.25	1|1	0|1	1|1	1|1	0|1	1|1	1|1	1|1	0|1	0|1	1|1	0|1	0|1	0|1	1|1	1|1	0|1	0|1	0|1	0,1	25,2	0,11	0,4	4,15	0,3	0,15	0,22	2,9	13,6	0,22	2,10	1,6	3,6	0,8	0,7	1,1	2,1	27,15
Unigene0000996	2194	2194	C	T	SNP	.	530.02	0|1	1|1	1|1	0|1	.|.	.|.	.|.	0|0	1|1	.|.	1|1	1|1	.|.	0|1	.|.	.|.	.|.	.|.	1|1	3,2	0,1	0,1	1,1	.,.	.,.	.,.	10,0	0,2	.,.	0,1	0,2	.,.	1,3	.,.	.,.	.,.	.,.	0,1
Unigene0000999	736	736	C	T	SNP	.	3143.81	1|1	1|1	0|1	0|1	0|0	1|1	0|0	1|1	0|1	0|1	0|0	0|1	0|1	0|1	1|1	0|1	1|1	1|1	0|1	.	0,12	4,3	3,1	3,0	0,1	5,0	0,4	1,11	1,7	2,0	4,1	1,3	8,2	0,13	2,3	0,9	0,2	2,8
Unigene0000999	764	764	A	T	SNP	.	1199.74	.|.	0|0	0|1	1|1	1|1	.|.	1|1	.|.	0|1	0|1	1|1	1|1	0|1	1|1	0|0	0|1	0|0	.|.	0|1	.,.	3,0	2,4	0,3	0,3	.,.	0,5	.,.	7,1	3,1	0,2	0,4	3,1	0,7	7,0	1,2	4,0	.,.	5,2
Unigene0001011	918	918	G	T	SNP	.	1112.56	.|.	0|1	0|0	1|1	0|1	1|1	0|1	1|1	1|1	1|1	1|1	0|1	0|1	0|1	0|1	0|1	0|0	1|1	.|.	.,.	6,5	4,0	0,3	3,2	0,5	3,4	0,2	0,4	0,5	0,2	2,1	4,1	7,1	1,2	2,1	1,0	0,4	.,.
Unigene0001011	1226	1226	G	C	SNP	.	4419.81	1|1	0|1	0|1	0|1	0|1	0|1	0|1	1|1	1|1	1|1	1|1	0|1	0|0	0|0	0|1	0|1	1|1	0|1	0|1	0,2	26,12	9,6	15,4	3,13	1,9	22,6	0,11	0,15	0,15	0,13	3,6	5,0	12,0	6,10	8,1	0,1	3,1	6,1
Unigene0001020	763	763	A	G	SNP	.	10853.4	1|1	1|1	0|1	0|1	0|1	1|1	0|1	1|1	1|1	1|1	0|1	0|1	0|1	0|1	1|1	0|0	1|1	1|1	1|1	1,34	0,22	8,15	5,14	5,17	0,9	7,16	0,22	0,29	0,3	4,23	1,10	3,13	7,14	0,3	1,0	0,31	0,5	0,4
Unigene0001022	187	187	A	G	SNP	.	7804.88	1|1	1|1	1|1	0|1	1|1	0|1	1|1	1|1	1|1	0|1	0|1	1|1	0|1	1|1	0|1	0|1	0|1	0|1	0|1	0,9	0,29	0,19	7,11	0,6	8,1	0,8	0,2	0,13	9,18	6,11	0,11	2,5	0,20	7,14	2,5	1,9	3,7	3,13
Unigene0001033	266	266	A	G	SNP	.	5202.4	1|1	0|1	0|1	1|1	1|1	1|1	0|1	0|1	0|1	.|.	1|1	1|1	0|1	0|1	1|1	0|1	0|1	1|1	0|1	0,4	6,18	3,6	2,24	0,3	1,15	3,8	5,3	2,9	.,.	0,9	0,1	1,5	5,9	0,1	2,3	9,8	0,9	2,12
Unigene0001033	545	545	C	A	SNP	.	1335.57	1|1	0|0	0|0	1|1	0|0	0|0	0|1	1|1	0|1	1|1	0|1	0|0	0|1	0|0	1|1	0|0	1|1	0|1	1|1	0,8	8,0	1,0	0,4	1,0	6,0	16,5	0,3	8,3	0,3	5,2	2,0	4,1	3,0	0,4	5,0	0,3	2,1	0,1
Unigene0001053	290	290	G	T	SNP	.	5784.06	0|1	1|1	.|.	1|1	.|.	1|1	0|1	1|1	.|.	0|1	0|1	1|1	0|1	0|1	0|0	0|0	.|.	0|0	1|1	23,8	0,21	.,.	4,78	.,.	0,3	14,2	0,1	.,.	9,3	33,4	0,1	1,1	2,18	44,1	28,0	.,.	2,0	0,6
Unigene0001057	27	27	A	G	SNP	.	812.79	.|.	0|0	1|1	1|1	0|1	0|0	1|1	.|.	.|.	1|1	0|1	0|1	0|1	0|0	0|0	1|1	.|.	1|1	0|0	.,.	3,0	0,2	0,6	1,2	1,0	0,3	.,.	.,.	0,2	2,3	2,1	2,2	1,0	1,0	0,3	.,.	0,1	1,0
Unigene0001057	77	77	T	C	SNP	.	9825.98	.|.	0|0	1|1	1|1	0|1	0|1	1|1	.|.	0|1	1|1	0|1	0|1	0|1	0|0	0|0	1|1	0|0	1|1	0|0	.,.	42,0	0,34	0,54	13,21	7,10	0,35	.,.	11,6	0,31	35,14	13,25	15,9	27,0	22,0	0,24	8,0	0,10	9,0
Unigene0001057	204	204	A	T	SNP	.	21887.6	1|1	0|1	1|1	1|1	0|1	0|1	1|1	1|1	0|1	1|1	0|1	0|1	0|1	0|1	0|1	1|1	0|1	1|1	0|1	0,22	74,37	0,20	0,39	15,20	11,18	0,63	0,13	22,10	0,65	48,40	18,18	15,19	41,17	32,12	0,34	13,13	0,24	13,10
Unigene0001057	208	208	C	T	SNP	.	21545.6	1|1	0|1	1|1	1|1	0|1	0|1	1|1	1|1	0|1	1|1	0|1	0|1	0|1	0|1	0|1	1|1	0|1	1|1	0|1	0,24	80,42	0,21	0,40	17,17	11,19	0,61	0,15	22,11	0,70	50,42	19,19	16,20	43,21	34,13	0,36	14,15	0,26	14,11
Unigene0001057	691	691	C	G	SNP	.	31933.1	1|1	0|1	1|1	1|1	1|1	0|1	0|1	1|1	0|1	0|1	0|1	1|1	0|1	0|1	0|1	0|1	0|1	0|1	0|1	0,61	59,98	0,14	0,30	0,64	4,24	62,19	0,159	11,39	38,56	44,73	1,48	23,39	41,77	8,24	19,11	22,53	20,18	15,38
Unigene0001058	235	235	A	G	SNP	.	1336.4	1|1	0|0	0|1	0|1	1|1	0|1	0|1	1|1	0|1	1|1	0|1	0|1	1|1	0|1	0|1	1|1	0|0	.|.	0|0	0,11	4,0	2,2	8,4	0,1	2,2	1,1	0,2	3,2	0,1	2,3	7,3	0,2	4,2	4,2	0,1	5,0	.,.	4,0
Unigene0001058	833	833	C	T	SNP	.	1541.15	1|1	0|1	0|1	0|1	0|0	0|1	0|1	1|1	1|1	1|1	0|1	0|1	0|1	1|1	0|1	0|1	0|1	1|1	0|1	0,5	1,2	1,1	13,5	3,0	1,1	5,1	0,1	0,5	0,1	1,3	4,3	1,2	0,5	3,1	2,3	1,4	0,1	1,1
Unigene0001060	255	255	A	G	SNP	.	962.24	0|0	0|0	1|1	0|1	0|1	0|1	1|1	0|1	0|0	1|1	0|0	.|.	0|1	1|1	1|1	1|1	1|1	0|0	0|1	3,0	4,0	0,1	2,1	2,1	3,2	0,2	8,3	1,0	0,3	3,0	.,.	1,4	0,5	0,1	0,3	0,2	1,0	1,2
Unigene0001060	274	274	A	G	SNP	.	973.09	0|0	0|0	.|.	0|0	0|1	0|1	1|1	0|1	0|0	1|1	0|1	.|.	1|1	1|1	1|1	0|1	1|1	0|0	0|1	3,0	4,0	.,.	2,0	1,2	3,3	0,2	7,5	2,0	0,2	3,1	.,.	0,4	0,4	0,1	1,2	0,3	1,0	1,3
Unigene0001061	651	651	C	T	SNP	.	12626.8	1|1	1|1	1|1	1|1	0|1	1|1	0|1	1|1	0|1	1|1	0|1	0|1	0|1	0|1	1|1	1|1	0|1	0|1	0|1	0,31	0,36	0,13	0,27	4,6	0,34	8,15	1,32	4,17	1,13	7,10	12,2	6,9	5,33	0,11	0,21	12,13	12,3	19,13
Unigene0001071	147	147	A	C	SNP	.	2319.41	0|1	1|1	.|.	.|.	.|.	1|1	0|1	1|1	0|1	1|1	0|1	1|1	0|1	0|1	1|1	0|0	1|1	.|.	1|1	7,6	0,19	.,.	.,.	.,.	0,3	2,3	0,1	1,1	0,8	1,1	0,1	1,1	2,2	0,9	2,0	0,1	.,.	0,6
Unigene0001078	321	321	T	C	SNP	.	4884.54	1|1	0|1	0|1	1|1	0|1	0|1	0|1	1|1	1|1	.|.	1|1	0|1	1|1	0|1	.|.	1|1	1|1	1|1	1|1	0,10	3,8	3,13	0,12	9,4	4,6	5,9	0,5	0,7	.,.	0,4	25,11	0,7	10,13	.,.	0,6	0,8	0,1	0,7
Unigene0001082	242	242	A	C	SNP	.	7194.95	0|1	0|1	1|1	0|1	1|1	1|1	0|1	0|1	0|1	1|1	0|1	1|1	1|1	0|1	1|1	1|1	0|1	1|1	0|1	11,14	11,10	0,6	10,17	0,3	0,14	8,7	6,8	7,8	0,12	8,4	0,6	0,18	16,9	0,2	0,17	9,5	0,13	4,12
Unigene0001096	209	209	G	A	SNP	.	4761.34	0|1	1|1	0|1	1|1	1|1	1|1	0|1	1|1	0|1	1|1	1|1	1|1	0|1	0|1	0|1	0|1	0|1	1|1	0|1	2,12	0,8	3,5	0,8	0,4	0,3	1,3	0,9	2,6	0,7	0,10	0,5	1,5	4,9	2,18	1,2	3,3	0,2	1,4
Unigene0001096	237	237	T	C	SNP	.	4096	0|1	1|1	0|1	1|1	1|1	1|1	0|1	1|1	0|1	1|1	1|1	1|1	0|1	0|1	0|1	0|1	0|1	1|1	0|1	3,9	0,10	3,5	0,10	0,4	0,5	2,3	0,6	2,3	0,6	0,7	0,3	2,8	4,10	3,15	3,2	3,4	0,1	1,4
Unigene0001096	1715	1715	T	C	SNP	.	806.61	1|1	1|1	.|.	0|1	0|1	0|0	0|0	1|1	1|1	.|.	1|1	.|.	1|1	1|1	.|.	.|.	.|.	.|.	.|.	0,2	0,2	.,.	2,1	2,1	1,0	2,0	0,4	0,3	.,.	0,1	.,.	0,3	0,4	.,.	.,.	.,.	.,.	.,.
Unigene0001103	1752	1752	C	T	SNP	.	2601.11	0|1	0|1	0|1	1|1	0|1	1|1	0|1	0|0	0|0	1|1	1|1	1|1	0|1	1|1	0|1	.|.	0|0	0|1	0|0	7,2	9,9	2,10	1,10	2,11	0,8	2,1	6,1	2,0	0,9	2,14	0,9	5,3	0,6	6,10	.,.	3,0	3,2	2,0
Unigene0001105	1108	1108	A	T	SNP	.	5064.78	1|1	1|1	1|1	0|1	0|1	1|1	0|1	1|1	1|1	1|1	1|1	0|1	0|1	1|1	1|1	0|1	0|1	1|1	0|1	0,9	0,9	0,8	3,9	1,6	0,6	1,8	0,7	0,9	0,4	0,9	1,5	3,5	0,9	0,5	2,5	4,10	0,2	2,8
Unigene0001105	1140	1140	A	G	SNP	.	8109.92	1|1	1|1	0|1	0|1	0|1	1|1	1|1	1|1	0|1	1|1	0|1	1|1	0|1	1|1	1|1	0|1	1|1	1|1	0|1	0,18	0,11	1,6	2,18	1,5	0,12	0,12	0,14	1,11	0,7	2,11	0,11	1,8	0,15	0,10	1,8	0,16	0,1	2,14
Unigene0001106	75	75	C	T	SNP	.	391.98	1|1	1|1	0|0	0|1	0|0	.|.	0|1	.|.	1|1	1|1	.|.	0|0	.|.	0|0	.|.	1|1	0|0	.|.	1|1	0,4	0,2	2,0	1,2	3,0	.,.	2,1	.,.	0,1	0,1	.,.	4,0	.,.	6,0	.,.	0,1	9,0	.,.	0,1
Unigene0001106	106	106	C	T	SNP	.	572.28	1|1	1|1	0|1	1|1	0|0	.|.	0|1	.|.	1|1	1|1	.|.	0|0	1|1	0|0	.|.	1|1	0|1	0|0	0|1	0,3	0,2	1,1	0,3	3,0	.,.	3,1	.,.	0,1	0,2	.,.	6,0	.	12,0	.,.	0,1	12,0	2,0	1,1
Unigene0001106	119	119	A	G	SNP	.	476.63	.|.	.|.	0|0	1|1	0|0	.|.	0|0	.|.	1|1	1|1	.|.	0|0	1|1	0|0	1|1	1|1	0|0	0|1	0|1	.,.	.,.	1,0	0,2	3,0	.,.	4,0	.,.	0,2	0,3	.,.	6,0	0,2	15,0	0,2	0,1	13,1	3,1	1,1
Unigene0001106	168	168	A	G	SNP	.	3716.72	1|1	0|1	0|1	1|1	0|1	.|.	0|1	1|1	1|1	1|1	.|.	0|0	1|1	0|0	1|1	1|1	0|1	0|1	0|1	0,13	1,5	4,6	0,7	6,1	.,.	7,4	0,3	0,13	0,9	.,.	8,0	0,9	22,1	0,9	0,5	15,7	7,5	2,3
Unigene0001106	650	650	T	G	SNP	.	1356.75	1|1	0|0	1|1	1|1	0|0	1|1	0|1	1|1	1|1	0|1	0|0	0|0	0|1	1|1	0|1	0|0	1|1	0|0	.|.	0,5	11,0	0,3	0,6	6,0	0,1	1,4	0,2	0,2	5,1	14,0	3,0	11,5	0,6	9,1	1,0	0,4	3,0	.,.
Unigene0001113	89	89	T	C	SNP	.	1850.84	1|1	1|1	0|0	0|1	.|.	0|0	0|0	1|1	1|1	0|1	1|1	0|0	0|0	0|1	0|1	0|1	0|0	1|1	0|1	0,6	0,18	1,0	2,1	.,.	4,0	3,0	0,3	0,2	3,4	0,2	2,0	1,0	3,1	5,5	1,5	3,0	0,6	2,2
Unigene0001113	142	142	C	T	SNP	.	1112.99	1|1	0|1	0|0	1|1	.|.	1|1	0|0	0|1	0|0	0|1	0|1	1|1	0|1	0|1	0|1	0|0	1|1	0|1	1|1	0,4	19,3	3,0	0,3	.,.	0,4	4,0	4,1	4,0	10,4	3,1	0,2	2,1	2,2	5,3	7,0	0,1	5,3	0,2
Unigene0001113	271	271	C	T	SNP	.	3183.85	1|1	0|1	1|1	1|1	1|1	.|.	1|1	1|1	0|1	0|1	0|1	1|1	0|1	1|1	0|1	0|0	1|1	0|1	.|.	0,5	56,9	0,5	0,1	0,2	.,.	0,6	0,11	6,1	35,19	14,8	0,2	3,7	0,9	9,4	11,0	0,4	7,3	.,.
Unigene0001117	1067	1067	A	C	SNP	.	1958.39	.|.	0|1	1|1	0|1	1|1	0|1	.|.	0|1	0|1	.|.	0|1	0|1	1|1	0|1	1|1	.|.	1|1	1|1	1|1	.,.	1,5	0,1	17,13	0,3	2,5	.,.	1,1	2,3	.,.	1,1	5,3	0,2	2,6	0,3	.,.	0,1	0,1	0,7
Unigene0001117	1233	1233	T	G	SNP	.	2482.77	0|0	0|1	1|1	0|1	0|1	0|1	0|0	1|1	0|1	1|1	0|1	0|1	1|1	0|1	1|1	1|1	1|1	.|.	0|1	1,0	1,5	0,1	32,16	2,3	2,10	1,0	0,2	1,3	0,1	3,4	6,6	0,2	15,10	0,4	0,2	0,2	.,.	1,6
Unigene0001117	1368	1368	A	T	SNP	.	2919.69	.|.	1|1	.|.	1|1	0|1	0|1	1|1	.|.	1|1	.|.	1|1	0|1	0|0	1|1	0|0	0|0	0|0	.|.	0|1	.,.	0,2	.,.	0,48	1,2	10,2	0,3	.,.	0,2	.,.	0,1	3,11	2,0	0,14	8,0	2,0	2,0	.,.	1,1
Unigene0001122	182	182	C	G	SNP	.	990.22	0|0	0|1	1|1	1|1	1|1	1|1	0|1	0|0	1|1	0|0	0|1	0|1	.|.	0|0	.|.	1|1	0|1	1|1	0|0	4,0	3,6	0,1	0,3	0,1	0,1	1,6	1,0	0,3	1,0	1,2	1,3	.,.	4,0	.,.	0,2	1,2	0,1	2,0
Unigene0001122	213	213	C	G	SNP	.	373.41	1|1	0|0	0|0	0|1	0|0	0|0	0|1	1|1	1|1	1|1	0|0	0|0	.|.	0|0	1|1	0|0	0|1	.|.	1|1	0,1	6,1	1,0	3,1	1,0	2,0	5,2	0,1	0,2	0,2	3,0	2,0	.,.	4,0	0,1	2,0	2,1	.,.	0,1
Unigene0001126	154	154	G	A	SNP	.	312.98	0|0	.|.	1|1	1|1	1|1	1|1	.|.	0|0	.|.	.|.	.|.	1|1	.|.	1|1	.|.	.|.	.|.	.|.	.|.	21,0	.,.	0,1	0,1	0,1	0,1	.,.	25,0	.,.	.,.	.,.	0,2	.,.	0,2	.,.	.,.	.,.	.,.	.,.
Unigene0001126	168	168	T	C	SNP	.	312.98	0|0	.|.	1|1	1|1	1|1	1|1	.|.	0|0	.|.	.|.	.|.	1|1	.|.	1|1	.|.	.|.	.|.	.|.	.|.	21,0	.,.	0,1	0,1	0,1	0,1	.,.	21,0	.,.	.,.	.,.	0,2	.,.	0,2	.,.	.,.	.,.	.,.	.,.
Unigene0001126	538	538	A	G	SNP	.	247.98	0|0	.|.	1|1	1|1	.|.	.|.	.|.	0|0	.|.	.|.	.|.	1|1	.|.	.|.	1|1	.|.	.|.	1|1	1|1	41,0	.,.	0,1	0,2	.,.	.,.	.,.	23,1	.,.	.,.	.,.	0,1	.,.	.,.	0,1	.,.	.,.	0,1	0,1
Unigene0001126	612	612	C	T	SNP	.	702.55	0|0	.|.	1|1	1|1	1|1	.|.	.|.	0|0	.|.	.|.	.|.	1|1	.|.	1|1	1|1	1|1	.|.	.|.	.|.	36,0	.,.	0,4	0,2	0,2	.,.	.,.	21,0	.,.	.,.	.,.	0,2	.,.	0,4	0,2	0,1	.,.	.,.	.,.
Unigene0001147	435	435	G	C	SNP	.	2525.34	0|0	1|1	0|1	1|1	0|1	1|1	0|1	0|0	0|1	1|1	1|1	1|1	0|0	0|1	1|1	.|.	0|0	0|1	0|1	6,0	0,6	3,4	0,14	1,1	0,8	2,7	1,0	8,2	0,8	0,9	0,1	1,0	3,6	0,1	.,.	2,0	2,2	13,2
Unigene0001150	274	274	C	T	SNP	.	1117.75	0|0	0|1	0|1	1|1	1|1	.|.	0|1	1|1	0|1	.|.	.|.	0|1	1|1	0|1	.|.	1|1	0|1	1|1	0|1	4,0	2,3	2,2	0,1	0,3	.,.	1,3	0,1	2,3	.,.	.,.	1,2	0,4	1,4	.,.	0,2	1,1	0,2	1,3
Unigene0001150	484	484	C	T	SNP	.	1167.09	1|1	1|1	0|1	0|1	.|.	0|1	0|1	0|1	1|1	0|0	0|0	0|1	1|1	0|1	.|.	1|1	1|1	0|0	.|.	1,4	0,6	3,2	2,2	.,.	3,3	1,1	3,1	0,1	1,0	2,0	2,2	0,1	6,1	.,.	0,5	0,2	4,0	.,.
Unigene0001150	492	492	A	G	SNP	.	1368.98	1|1	1|1	0|1	0|1	.|.	0|1	0|1	0|1	1|1	0|0	0|0	0|1	1|1	0|1	.|.	1|1	1|1	0|1	.|.	1,4	0,7	3,2	2,3	.,.	3,3	1,1	2,2	0,1	1,0	2,0	2,2	0,1	6,1	.,.	0,6	0,2	4,1	.,.
Unigene0001150	849	849	C	T	SNP	.	909.02	1|1	1|1	1|1	0|0	1|1	0|0	1|1	1|1	0|0	0|0	1|1	1|1	0|1	.|.	.|.	1|1	0|0	.|.	0|1	0,4	0,4	0,1	10,0	0,1	3,0	0,1	0,7	1,0	1,0	0,2	0,1	7,2	.,.	.,.	0,1	7,0	.,.	7,1
Unigene0001154	4839	4839	T	C	SNP	.	3119.25	1|1	1|1	1|1	0|1	0|1	0|1	1|1	1|1	0|1	0|1	0|1	1|1	0|1	0|1	0|1	0|1	0|1	0|1	0|1	0,7	0,19	0,9	2,5	2,4	2,4	0,3	0,4	1,1	2,3	2,7	0,4	3,1	10,4	3,8	1,1	8,2	4,1	3,3
Unigene0001157	1439	1439	A	T	SNP	.	4427.98	1|1	0|1	0|1	0|1	0|1	1|1	1|1	1|1	0|1	0|1	.|.	0|1	0|0	1|1	1|1	1|1	0|1	0|1	0|1	0,2	17,2	7,21	4,5	14,11	0,1	2,15	0,25	4,8	4,6	.,.	25,10	8,0	0,11	0,1	0,9	9,5	6,1	8,1
Unigene0001173	283	283	C	G	SNP	.	761.46	0|1	0|1	0|0	1|1	.|.	1|1	1|1	0|1	0|1	1|1	1|1	.|.	0|1	0|1	0|0	1|1	.|.	0|0	.|.	1,4	3,2	1,0	0,2	.,.	0,1	0,3	1,2	1,1	0,1	0,2	.,.	1,3	3,1	1,0	0,1	.,.	1,0	.,.
Unigene0001173	1043	1043	T	C	SNP	.	7230.57	0|1	0|1	0|1	1|1	1|1	1|1	.|.	.|.	0|1	.|.	1|1	0|0	0|0	1|1	0|1	1|1	0|1	1|1	0|1	11,6	11,5	1,1	2,32	0,1	0,24	.,.	.,.	10,6	.,.	0,2	1,0	5,0	0,43	14,4	0,1	6,19	0,2	16,42
Unigene0001198	2541	2541	G	T	SNP	.	3970.99	1|1	1|1	1|1	0|1	0|0	1|1	0|1	1|1	0|1	1|1	0|1	0|1	1|1	0|1	1|1	0|1	1|1	1|1	1|1	0,17	0,19	0,5	19,9	9,0	0,3	3,2	0,1	1,4	0,3	2,7	7,1	1,15	8,2	0,6	1,4	0,2	0,2	0,4
Unigene0001198	2558	2558	A	G	SNP	.	3979	1|1	1|1	0|1	1|1	1|1	.|.	0|1	.|.	0|1	0|1	1|1	1|1	0|1	1|1	0|1	0|1	0|0	0|1	0|0	0,12	0,13	3,0	2,23	0,9	.,.	2,3	.,.	3,2	1,2	0,9	0,7	6,8	0,8	4,0	2,2	2,0	1,1	4,0
Unigene0001198	2723	2723	A	G	SNP	.	680.25	0|1	1|1	0|1	1|1	1|1	1|1	1|1	0|0	0|0	.|.	0|1	.|.	1|1	.|.	.|.	0|0	1|1	.|.	0|1	1,5	0,3	1,1	0,2	0,2	0,1	0,2	2,0	1,0	.,.	1,1	.,.	0,1	.,.	.,.	1,0	0,1	.,.	1,1
Unigene0001208	441	441	G	T	SNP	.	3775.96	0|1	1|1	1|1	0|1	0|1	0|1	1|1	0|1	0|1	0|1	1|1	1|1	.|.	1|1	1|1	1|1	1|1	1|1	0|1	3,9	1,6	0,1	2,17	3,9	1,6	0,11	2,1	7,1	1,3	0,2	0,2	.,.	0,19	0,1	0,5	1,6	0,2	1,4
Unigene0001209	711	711	A	G	SNP	.	1004.79	0|1	0|0	1|1	0|1	1|1	0|0	1|1	1|1	1|1	0|0	0|0	1|1	1|1	0|1	0|0	.|.	0|1	.|.	.|.	2,3	4,0	0,5	5,2	0,1	2,0	0,1	0,2	0,3	1,0	1,0	0,3	0,6	3,1	2,0	.,.	2,2	.,.	.,.
Unigene0001211	292	292	A	G	SNP	.	4873.33	0|1	0|1	0|1	0|1	0|1	0|1	1|1	1|1	0|1	1|1	0|1	1|1	1|1	0|1	1|1	1|1	0|1	1|1	0|1	4,15	2,9	6,6	5,18	2,7	1,5	0,7	0,3	2,7	0,5	1,9	0,6	0,2	2,10	0,12	0,3	3,10	0,1	1,1
Unigene0001211	1299	1299	T	G	SNP	.	2675.3	1|1	0|1	0|1	0|1	0|1	0|1	0|1	0|1	0|1	0|1	0|1	0|1	1|1	1|1	1|1	1|1	0|1	1|1	0|1	0,3	2,6	5,3	2,8	3,8	1,2	1,3	1,3	2,3	5,3	10,2	2,4	0,4	0,10	0,1	0,4	2,6	0,1	2,3
Unigene0001218	2526	2526	A	G	SNP	.	564.13	.|.	.|.	.|.	.|.	0|0	.|.	1|1	.|.	1|1	1|1	0|0	1|1	1|1	1|1	.|.	1|1	.|.	.|.	1|1	.,.	.,.	.,.	.,.	1,0	.,.	0,2	.,.	0,3	0,2	1,0	0,2	0,1	0,2	.,.	0,2	.,.	.,.	0,1
Unigene0001218	2780	2780	C	T	SNP	.	617.47	1|1	0|1	0|0	1|1	0|1	1|1	1|1	1|1	0|1	1|1	0|0	.|.	0|1	.|.	0|0	1|1	0|1	.|.	0|0	0,1	1,2	1,0	0,1	1,2	0,1	0,1	0,1	4,3	0,1	1,0	.,.	2,3	.,.	1,0	0,1	1,1	.,.	1,0
Unigene0001218	3415	3415	A	G	SNP	.	6315.94	1|1	0|1	0|1	0|1	0|1	0|1	0|1	1|1	0|1	1|1	1|1	1|1	0|1	1|1	1|1	1|1	0|1	1|1	0|1	0,1	6,19	5,2	3,4	4,11	2,7	1,7	0,9	8,15	0,8	0,8	0,6	5,11	0,19	0,4	0,8	2,6	0,3	8,10
Unigene0001221	330	330	A	G	SNP	.	2008.32	1|1	0|1	1|1	0|1	0|0	1|1	0|1	1|1	1|1	1|1	1|1	0|1	1|1	0|1	1|1	0|1	1|1	.|.	1|1	0,2	5,3	0,2	4,5	3,0	0,3	1,4	0,4	0,2	0,1	0,4	1,1	0,5	7,4	0,2	2,1	0,8	.,.	0,3
Unigene0001224	552	552	A	G	SNP	.	5248.19	1|1	0|1	1|1	0|1	1|1	1|1	0|1	1|1	1|1	0|1	0|1	.|.	0|1	0|1	0|1	0|1	0|1	0|1	0|1	0,1	28,18	0,2	1,2	0,4	0,7	22,26	0,4	0,2	8,17	9,4	.,.	2,2	2,3	18,6	24,22	1,1	29,7	6,8
Unigene0001224	554	554	C	T	SNP	.	5248.19	1|1	0|1	1|1	0|1	1|1	1|1	0|1	1|1	1|1	0|1	0|1	.|.	0|1	0|1	0|1	0|1	0|1	0|1	0|1	0,1	28,18	0,2	1,2	0,4	0,7	22,26	0,4	0,2	8,17	9,4	.,.	2,2	2,3	18,6	22,22	1,1	29,7	6,8
Unigene0001229	103	103	T	C	SNP	.	3980.31	1|1	1|1	0|0	1|1	1|1	1|1	0|1	1|1	0|1	0|1	0|1	0|0	0|1	0|1	1|1	0|1	1|1	0|1	1|1	0,1	0,13	3,0	0,6	0,1	0,1	71,21	0,3	2,7	27,8	3,2	1,0	4,4	1,5	0,4	33,6	2,17	1,2	0,14
Unigene0001241	272	272	A	C	SNP	.	6217.01	1|1	0|1	0|1	0|1	0|1	1|1	0|1	0|1	1|1	0|1	1|1	0|1	1|1	1|1	1|1	0|1	1|1	1|1	0|1	0,4	2,10	5,8	12,11	1,7	0,5	8,18	5,6	0,11	1,9	0,10	3,9	0,9	0,6	0,8	2,14	0,5	0,8	1,12
Unigene0001249	783	783	G	C	SNP	.	6223.6	0|1	1|1	1|1	0|1	1|1	1|1	0|0	0|0	0|1	1|1	1|1	1|1	1|1	0|1	0|1	0|1	1|1	0|0	1|1	8,23	0,28	0,3	4,7	0,22	0,1	42,3	19,0	20,6	0,18	1,20	0,4	0,6	20,13	12,2	32,3	0,7	12,0	0,11
Unigene0001249	843	843	T	A	SNP	.	3913.89	0|1	0|1	1|1	1|1	0|1	1|1	0|0	0|1	1|1	0|1	0|1	0|1	0|1	0|1	1|1	1|1	1|1	0|1	1|1	49,3	7,14	0,5	0,6	12,5	0,4	38,3	9,12	0,21	13,4	15,3	3,3	4,5	18,7	0,7	0,10	0,5	1,8	0,8
Unigene0001279	742	742	C	G	SNP	.	3294.83	1|1	0|1	0|1	0|1	0|1	0|0	1|1	0|1	0|1	0|1	1|1	1|1	1|1	1|1	0|1	0|1	0|1	1|1	0|1	0,6	11,5	2,4	3,7	1,2	3,0	0,2	1,5	1,6	3,4	0,3	0,1	0,2	1,15	1,4	1,6	4,5	0,1	1,5
Unigene0001279	955	955	C	T	SNP	.	2434.5	1|1	0|1	0|1	0|1	1|1	1|1	0|1	0|1	0|1	1|1	0|1	1|1	0|1	0|1	0|1	0|1	0|1	0|1	1|1	0,7	2,3	3,6	9,1	0,1	0,1	3,4	5,4	1,3	0,5	2,1	0,4	2,3	1,9	2,4	2,3	2,8	1,2	0,3
Unigene0001321	265	265	G	A	SNP	.	16029.1	1|1	1|1	0|1	0|1	0|1	0|1	0|1	1|1	0|1	0|1	0|1	0|1	1|1	1|1	0|1	0|1	0|1	1|1	0|1	0,25	0,75	9,15	7,24	2,16	22,16	7,43	0,16	8,11	7,38	18,9	2,8	0,17	0,55	4,10	7,16	14,24	0,6	9,15
Unigene0001323	698	698	C	G	SNP	.	17296.3	0|1	1|1	1|1	1|1	1|1	1|1	1|1	1|1	0|1	0|1	0|1	1|1	1|1	1|1	0|1	1|1	0|1	0|1	0|1	16,27	1,43	0,12	0,25	0,14	0,15	0,31	0,30	5,25	7,35	19,18	0,6	0,28	0,31	3,23	1,14	1,11	3,29	4,29
Unigene0001325	343	343	G	A	SNP	.	922.36	0|0	0|1	1|1	1|1	.|.	1|1	1|1	0|1	0|0	1|1	.|.	.|.	0|1	.|.	1|1	0|1	.|.	1|1	.|.	3,0	1,2	0,1	0,5	.,.	0,2	0,4	11,1	2,0	0,1	.,.	.,.	1,2	.,.	0,4	1,4	.,.	0,1	.,.
Unigene0001325	431	431	G	A	SNP	.	939.79	0|0	1|1	1|1	1|1	.|.	1|1	1|1	0|0	0|1	1|1	.|.	.|.	1|1	.|.	1|1	1|1	.|.	1|1	.|.	7,0	0,3	0,1	0,6	.,.	0,1	0,4	14,0	1,1	0,1	.,.	.,.	0,1	.,.	0,3	0,3	.,.	0,1	.,.
Unigene0001325	449	449	A	T	SNP	.	521.32	0|0	1|1	1|1	1|1	.|.	1|1	1|1	0|0	0|1	1|1	.|.	.|.	1|1	.|.	1|1	1|1	.|.	.|.	.|.	8,0	0,2	0,1	0,2	.,.	0,1	0,2	13,0	1,1	0,1	.,.	.,.	0,1	.,.	0,1	0,2	.,.	.,.	.,.
Unigene0001325	590	590	A	G	SNP	.	491.54	0|0	.|.	1|1	1|1	.|.	.|.	1|1	0|0	0|0	1|1	.|.	.|.	1|1	.|.	1|1	1|1	.|.	1|1	.|.	7,0	.,.	0,1	0,3	.,.	.,.	0,2	9,0	3,0	0,2	.,.	.,.	0,2	.,.	0,1	0,2	.,.	0,1	.,.
Unigene0001333	1291	1291	A	G	SNP	.	5536.07	1|1	0|1	1|1	0|1	1|1	1|1	0|1	1|1	0|1	1|1	0|1	0|1	0|1	1|1	0|1	1|1	0|1	1|1	0|1	0,4	6,5	0,8	4,8	0,9	0,7	3,5	0,12	4,18	0,3	7,0	2,6	1,2	0,13	3,1	0,8	2,8	0,6	3,10
Unigene0001338	12	12	C	A	SNP	.	400.84	.|.	1|1	.|.	1|1	1|1	.|.	1|1	.|.	0|1	.|.	.|.	1|1	.|.	1|1	.|.	.|.	1|1	0|0	1|1	.,.	0,2	.,.	0,2	0,1	.,.	0,1	.,.	1,1	.,.	.,.	0,1	.,.	0,2	.,.	.,.	0,1	1,0	0,1
Unigene0001338	1197	1197	A	G	SNP	.	4407.55	1|1	0|0	1|1	1|1	1|1	0|1	1|1	1|1	1|1	1|1	1|1	1|1	1|1	0|1	1|1	.|.	0|0	1|1	0|0	0,6	13,0	0,11	0,9	0,12	6,7	0,9	0,3	0,14	0,9	0,8	0,4	0,6	7,8	0,5	.,.	13,0	0,1	8,0
Unigene0001353	201	201	C	T	SNP	.	4372.01	1|1	1|1	0|1	1|1	1|1	1|1	0|1	1|1	0|1	1|1	1|1	0|1	0|1	1|1	0|1	1|1	0|1	1|1	0|1	0,9	0,13	3,6	0,13	0,1	0,9	3,6	0,10	4,4	0,5	0,7	2,8	6,3	0,16	2,4	0,2	3,5	0,2	1,2
Unigene0001353	1004	1004	C	A	SNP	.	7000.17	1|1	1|1	0|1	1|1	0|1	1|1	0|1	1|1	0|1	1|1	1|1	0|1	0|1	1|1	0|1	1|1	0|1	1|1	0|1	0,17	0,12	5,8	0,14	5,10	0,13	3,11	0,12	6,16	0,9	0,2	4,1	1,5	0,16	9,6	0,5	5,10	0,5	6,3
Unigene0001360	160	160	C	A	SNP	.	2195.26	1|1	0|1	0|1	0|1	0|0	0|1	1|1	1|1	0|1	1|1	0|1	1|1	0|1	0|1	0|1	.|.	0|1	1|1	0|1	0,14	5,4	2,2	2,1	3,0	3,4	0,1	0,1	2,4	0,1	2,4	0,1	2,2	3,7	2,6	.,.	2,8	0,1	2,3
Unigene0001360	637	637	T	A	SNP	.	12116.8	0|1	0|1	0|1	0|1	1|1	1|1	0|1	0|1	0|1	1|1	1|1	1|1	1|1	0|1	1|1	1|1	0|1	1|1	0|1	18,16	5,29	3,23	13,19	0,16	0,11	11,13	2,6	4,28	0,10	0,6	0,10	0,16	9,35	0,29	0,10	3,22	0,11	5,16
Unigene0001360	721	721	C	G	SNP	.	1967.15	1|1	0|1	0|1	1|1	0|1	0|0	1|1	1|1	0|1	0|0	.|.	0|1	0|1	0|1	0|1	0|1	1|1	0|0	1|1	0,14	4,2	11,2	0,4	4,3	9,0	0,7	0,7	1,4	12,0	.,.	1,2	4,1	27,3	3,3	2,1	0,2	4,0	0,1
Unigene0001361	354	354	G	A	SNP	.	6600.42	1|1	0|1	1|1	1|1	1|1	1|1	0|1	1|1	1|1	1|1	1|1	1|1	1|1	1|1	0|1	0|1	1|1	0|1	0|1	0,3	9,19	0,2	0,12	0,9	0,5	2,21	0,9	0,4	0,22	0,2	0,6	0,1	0,9	7,9	1,6	0,4	3,7	6,9
Unigene0001361	357	357	G	A	SNP	.	6594.56	1|1	0|1	1|1	1|1	1|1	1|1	0|1	1|1	1|1	1|1	1|1	1|1	1|1	1|1	0|1	0|1	1|1	0|1	0|1	0,3	8,19	0,2	0,10	0,9	0,4	2,21	0,9	0,4	0,21	0,1	0,6	0,1	0,9	6,9	1,5	0,5	3,7	6,9
Unigene0001368	1155	1155	A	T	SNP	.	5243.99	1|1	0|1	0|1	0|1	0|1	0|1	0|1	1|1	0|1	0|1	0|1	0|1	0|1	1|1	0|1	0|1	1|1	1|1	1|1	0,7	7,9	2,4	8,10	1,7	4,10	11,12	0,15	3,6	4,5	11,14	6,6	2,3	0,14	5,4	2,1	0,6	0,3	0,5
Unigene0001370	346	346	T	C	SNP	.	1513.24	1|1	0|1	1|1	0|1	.|.	0|1	1|1	1|1	1|1	0|1	.|.	.|.	1|1	1|1	0|1	0|1	0|1	1|1	0|1	0,2	4,4	0,2	13,5	.,.	5,1	0,3	0,3	0,1	1,1	.,.	.,.	0,3	0,1	10,5	2,2	7,2	0,4	1,4
Unigene0001370	679	679	A	G	SNP	.	2080.85	1|1	0|1	.|.	1|1	1|1	1|1	.|.	1|1	0|0	1|1	1|1	1|1	1|1	0|1	0|1	0|1	0|1	1|1	0|1	0,2	4,13	.,.	0,7	0,1	0,1	.,.	0,1	1,0	0,5	0,7	0,5	0,2	1,2	12,5	2,3	4,2	0,3	1,1
Unigene0001379	1145	1145	G	A	SNP	.	52262.3	1|1	1|1	0|0	0|1	1|1	0|1	1|1	1|1	0|1	1|1	1|1	1|1	0|1	1|1	0|1	1|1	1|1	1|1	1|1	0,82	0,111	39,2	80,88	0,42	57,89	0,9	0,19	71,32	0,26	0,53	0,32	50,45	0,52	66281	0,36	0,156	0,24	0,182
Unigene0001379	1302	1302	A	C	SNP	.	9346.17	1|1	0|1	1|1	0|1	0|1	0|1	1|1	1|1	1|1	0|1	1|1	0|1	1|1	1|1	0|1	0|1	0|0	1|1	0|0	0,25	16,16	0,6	23,49	5,3	24,35	0,4	0,2	0,18	1,1	0,21	5,4	0,30	0,20	235,43	18,3	172,6	0,1	222,9
Unigene0001381	334	334	G	A	SNP	.	10620.5	1|1	0|1	0|1	0|1	1|1	0|1	1|1	1|1	1|1	0|1	0|1	1|1	1|1	1|1	0|1	1|1	1|1	0|1	1|1	0,18	9,28	5,7	5,16	0,14	15,7	0,17	0,18	0,18	37,5	20,5	0,10	0,13	0,19	3,12	0,14	0,17	6,17	0,15
Unigene0001381	412	412	G	C	SNP	.	826.84	0|0	0|1	1|1	0|1	1|1	1|1	0|1	0|0	1|1	0|1	1|1	.|.	0|0	1|1	0|0	.|.	1|1	1|1	.|.	12,0	8,3	0,1	0,2	0,2	0,3	1,3	20,0	0,1	2,4	.	.,.	1,0	0,1	1,0	.,.	0,1	0,0	.,.
Unigene0001381	435	435	C	T	SNP	.	708.33	0|0	0|1	1|1	0|1	0|0	0|1	0|1	0|0	0|1	1|1	1|1	0|0	.|.	1|1	.|.	0|0	1|1	1|1	.|.	14,0	11,2	0,2	4,1	2,0	1,1	3,5	24,0	1,3	0,2	0,2	1,0	.,.	0,1	.,.	1,0	0,1	0,2	.,.
Unigene0001381	764	764	A	C	SNP	.	5229.54	1|1	0|1	0|1	1|1	0|1	1|1	0|1	1|1	1|1	0|1	1|1	0|1	0|1	0|1	0|1	0|1	0|1	0|1	0|1	0,8	19,15	8,1	0,11	8,2	0,8	13,5	0,4	0,6	8,31	0,10	4,4	7,14	14,4	15,16	17,3	31,5	5,5	13,3
Unigene0001381	1051	1051	A	T	SNP	.	866.63	1|1	0|1	0|1	0|0	0|0	.|.	1|1	1|1	0|1	0|0	0|0	0|1	0|0	1|1	1|1	1|1	.|.	0|1	1|1	0,2	3,2	1,2	1,0	1,0	.,.	0,3	0,1	3,1	3,0	6,0	2,2	3,0	0,1	0,5	0,3	.,.	2,1	0,4
Unigene0001386	549	549	A	G	SNP	.	1421.64	0|1	1|1	1|1	1|1	1|1	1|1	0|1	0|0	0|1	1|1	1|1	0|1	0|1	0|1	1|1	1|1	0|0	0|0	0|1	4,3	0,6	0,1	0,3	0,1	0,3	2,2	1,0	6,3	0,1	0,3	2,1	2,2	1,1	0,6	0,1	3,0	1,0	1,1
Unigene0001386	662	662	C	T	SNP	.	1473.8	1|1	0|1	1|1	1|1	.|.	0|0	1|1	1|1	0|1	.|.	0|0	1|1	1|1	1|1	1|1	1|1	1|1	.|.	1|1	0,3	3,5	0,2	0,6	.,.	1,0	0,1	0,1	5,10	.,.	1,0	0,3	0,1	0,4	0,3	0,1	0,1	.,.	0,1
Unigene0001387	237	237	C	G	SNP	.	4384.27	.|.	0|1	1|1	1|1	0|1	0|1	1|1	.|.	1|1	1|1	0|1	0|1	1|1	0|1	1|1	1|1	1|1	1|1	1|1	.,.	36,12	0,9	0,6	10,1	8,2	1,5	.,.	0,9	0,23	6,8	2,1	0,7	5,3	0,3	0,5	0,3	0,4	0,16
Unigene0001387	270	270	A	T	SNP	.	7088.81	0|0	0|1	1|1	1|1	0|1	0|1	1|1	1|1	1|1	0|1	0|1	0|1	1|1	0|1	1|1	1|1	1|1	1|1	1|1	2,0	46,16	0,7	0,8	13,9	9,5	0,18	0,4	0,23	23,15	7,11	3,4	0,9	7,2	0,6	0,13	0,6	0,14	0,22
Unigene0001397	1209	1209	A	G	SNP	.	26817.5	0|1	0|1	1|1	0|1	0|1	1|1	0|1	0|1	1|1	1|1	1|1	0|1	1|1	1|1	1|1	1|1	1|1	0|1	1|1	68,7	55,57	0,15	7,47	6,23	0,40	8,78	90,12	0,42	0,88	0,30	2,11	0,13	0,69	0,52	0,42	0,29	17,20	0,36
Unigene0001399	252	252	T	C	SNP	.	7815.12	0|0	1|1	1|1	0|1	1|1	1|1	1|1	1|1	1|1	0|1	0|1	1|1	1|1	1|1	1|1	1|1	0|1	1|1	0|1	15,0	0,33	0,3	17,11	0,3	0,7	0,7	0,4	0,25	7,11	11,12	0,6	0,13	0,10	0,10	0,6	13,16	0,19	11,13
Unigene0001402	140	140	T	A	SNP	.	1139.87	.|.	1|1	1|1	0|1	.|.	.|.	1|1	1|1	0|1	.|.	0|1	.|.	.|.	.|.	.|.	1|1	0|1	1|1	0|1	.,.	0,3	0,1	13,5	.,.	.,.	0,1	0,1	2,4	.,.	1,3	.,.	.,.	.,.	.,.	0,2	1,4	0,4	3,5
Unigene0001404	241	241	A	G	SNP	.	10248.2	1|1	0|1	1|1	0|1	1|1	1|1	1|1	1|1	0|1	1|1	0|1	1|1	0|1	0|1	1|1	1|1	1|1	0|1	0|1	0,19	4,22	1,20	6,17	1,15	0,7	0,15	0,4	3,8	0,16	2,19	0,7	4,11	5,23	0,32	0,8	1,23	1,5	1,11
Unigene0001404	2893	2893	C	T	SNP	.	12785.5	0|1	1|1	0|1	0|1	0|1	0|1	0|1	0|1	1|1	0|1	0|1	0|1	1|1	1|1	1|1	0|1	1|1	1|1	1|1	14,9	0,54	5,12	4,22	4,17	3,16	8,22	7,24	0,32	3,11	5,11	3,10	0,25	0,29	0,1	1,9	0,20	0,8	0,28
Unigene0001408	3724	3724	A	G	SNP	.	4264.9	0|1	0|1	0|1	0|1	0|1	0|1	0|1	0|1	0|1	1|1	0|1	0|1	1|1	0|1	1|1	1|1	1|1	0|0	1|1	6,3	7,12	3,5	7,9	1,4	6,4	5,8	3,10	8,10	0,4	2,3	4,4	0,8	5,16	0,1	0,4	0,7	1,0	1,15
Unigene0001409	280	280	T	C	SNP	.	1086.87	1|1	0|1	1|1	0|1	.|.	0|1	1|1	1|1	0|1	0|1	0|1	1|1	0|0	0|1	.|.	0|0	0|1	1|1	0|1	0,3	1,4	0,5	5,1	.,.	3,1	0,1	0,4	7,1	3,1	4,1	0,3	7,0	3,1	.,.	2,0	2,2	0,1	2,3
Unigene0001409	1086	1086	C	A	SNP	.	1281.06	1|1	0|0	.|.	1|1	1|1	0|1	1|1	0|0	0|1	1|1	.|.	1|1	0|1	0|1	0|1	0|0	0|0	1|1	0|1	0,2	9,0	.,.	0,4	0,5	1,1	0,5	4,0	2,3	0,1	.,.	0,4	4,1	4,7	5,1	3,0	5,0	0,1	5,3
Unigene0001411	103	103	G	A	SNP	.	2820.52	0|1	1|1	0|0	1|1	0|0	0|1	0|1	1|1	0|1	0|1	0|1	0|1	1|1	0|1	0|1	0|1	1|1	1|1	0|1	7,10	0,5	7,0	0,6	1,0	1,4	3,1	0,3	3,8	1,3	10,2	7,1	0,8	7,4	1,4	1,1	0,5	0,3	2,8
Unigene0001411	255	255	T	G	SNP	.	2542.61	0|1	0|1	1|1	1|1	1|1	1|1	0|1	1|1	0|1	1|1	1|1	.|.	1|1	1|1	0|1	0|0	1|1	1|1	1|1	20,2	16,3	0,2	0,6	0,1	0,3	2,3	0,8	6,1	0,3	0,4	.,.	0,10	0,10	15,3	10,0	0,4	0,2	0,4
Unigene0001411	280	280	T	A	SNP	.	5917.26	0|1	0|1	1|1	1|1	0|1	0|1	0|1	1|1	0|1	0|1	1|1	1|1	0|1	0|1	0|1	0|1	0|1	1|1	0|1	23,6	16,9	0,6	0,18	1,5	3,9	3,8	0,15	9,5	11,8	0,12	0,6	10,6	6,13	16,6	11,5	2,6	0,7	2,14
Unigene0001412	2400	2400	A	G	SNP	.	7412.74	1|1	0|1	0|1	0|1	1|1	0|1	0|1	1|1	0|1	0|1	0|1	1|1	0|1	0|1	0|1	0|1	1|1	1|1	0|1	0,6	11,8	6,8	6,20	0,8	2,5	5,3	0,11	5,15	5,9	4,3	0,3	2,13	9,17	6,20	4,4	0,9	0,3	2,23
Unigene0001424	1729	1729	T	A	SNP	.	2370.71	0|1	0|1	1|1	0|0	1|1	1|1	0|1	0|1	0|0	0|1	1|1	0|0	0|0	1|1	0|1	1|1	1|1	.|.	0|1	3,1	2,10	0,1	1,0	0,2	0,1	3,5	6,3	4,0	2,12	0,2	1,0	2,0	0,3	4,13	0,5	0,2	.,.	2,2
Unigene0001425	297	297	A	C	SNP	.	821.8	1|1	0|1	0|1	0|1	0|1	1|1	0|0	1|1	0|1	1|1	0|1	0|0	1|1	1|1	.|.	.|.	0|0	.|.	0|0	0,1	5,2	1,5	2,2	4,1	0,2	4,0	0,3	1,2	0,3	2,3	1,0	0,1	0,1	.,.	.,.	1,0	.,.	2,0
Unigene0001428	100	100	C	T	SNP	.	2793.65	1|1	0|1	.|.	0|1	0|1	0|1	.|.	1|1	0|1	.|.	1|1	0|1	1|1	0|0	0|1	1|1	1|1	1|1	.|.	0,5	4,5	.,.	16,10	17,3	9,5	.,.	0,6	3,2	.,.	0,17	11,1	0,17	11,0	1,5	0,1	0,1	0,1	.,.
Unigene0001428	115	115	G	A	SNP	.	4097.94	1|1	0|1	1|1	0|1	0|1	0|1	1|1	1|1	0|1	.|.	1|1	0|1	1|1	0|0	0|1	1|1	1|1	1|1	1|1	0,5	4,9	0,1	14,12	16,4	9,7	0,1	0,7	2,2	.,.	0,24	10,2	0,26	10,1	1,6	0,1	0,2	0,3	0,1
Unigene0001428	251	251	A	C	SNP	.	10559	1|1	0|1	1|1	0|1	0|1	0|1	1|1	0|1	0|1	1|1	1|1	0|1	1|1	0|1	0|1	1|1	1|1	1|1	1|1	0,17	24,10	0,12	31,19	40,22	26,18	0,8	7,4	15,11	0,4	0,76	13,7	0,72	22,2	4,15	0,6	0,4	0,34	0,1
Unigene0001428	285	285	G	A	SNP	.	2995.99	1|1	0|1	0|1	0|1	0|1	0|0	1|1	0|1	0|1	1|1	0|1	0|1	0|1	0|0	0|1	1|1	1|1	0|0	1|1	0,10	16,3	8,2	23,9	25,11	35,0	0,3	4,2	14,2	0,3	26,23	9,4	45,6	17,1	4,7	0,5	0,1	19,2	0,1
Unigene0001432	676	676	A	G	SNP	.	1395.65	0|0	1|1	1|1	.|.	1|1	1|1	1|1	0|1	0|1	1|1	.|.	1|1	0|1	1|1	1|1	1|1	1|1	0|1	1|1	3,0	0,7	0,3	.,.	0,2	0,2	0,3	4,1	1,3	0,1	.,.	0,3	3,3	0,3	0,2	0,1	0,1	5,1	0,2
Unigene0001432	1008	1008	C	T	SNP	.	7187.17	0|0	.|.	1|1	1|1	1|1	1|1	0|0	0|0	1|1	1|1	0|1	1|1	1|1	0|0	1|1	0|1	1|1	1|1	1|1	19,0	.,.	0,13	0,12	0,8	0,10	10,0	10,0	0,31	0,9	1,12	0,6	0,12	4,0	0,11	6,2	0,33	0,4	0,26
Unigene0001432	1043	1043	C	G	SNP	.	2630.46	0|0	.|.	1|1	1|1	1|1	1|1	0|0	0|0	1|1	1|1	0|1	1|1	1|1	0|0	1|1	0|0	1|1	1|1	1|1	23,0	.,.	0,6	0,4	0,3	0,2	13,0	13,0	0,14	0,3	2,5	0,4	0,3	4,0	0,1	7,0	0,13	0,1	0,11
Unigene0001434	852	852	G	T	SNP	.	14420.4	0|0	0|0	1|1	0|1	1|1	1|1	0|1	.|.	1|1	1|1	1|1	1|1	1|1	0|1	1|1	1|1	1|1	1|1	1|1	2,0	7,0	0,20	6,28	1,18	1,19	1,8	.,.	0,47	0,6	0,40	1,21	1,27	4,3	0,2	0,20	1,51	0,12	0,59
Unigene0001434	944	944	A	T	SNP	.	12813.4	0|0	0|0	1|1	0|1	0|1	0|1	1|1	.|.	1|1	1|1	1|1	0|1	0|1	0|1	0|1	1|1	1|1	0|1	1|1	5,0	20,0	0,22	17,28	6,14	5,16	1,13	.,.	0,41	0,8	0,30	5,13	7,22	11,9	1,1	0,24	2,39	2,8	0,63
Unigene0001438	223	223	A	G	SNP	.	3139.61	.|.	0|1	1|1	1|1	1|1	1|1	0|1	1|1	1|1	0|1	.|.	1|1	1|1	.|.	.|.	0|1	.|.	0|0	1|1	.,.	3,4	0,3	1,8	0,4	0,1	10,18	0,4	0,4	6,14	.,.	0,14	0,1	.,.	.,.	3,10	.,.	2,0	0,3
Unigene0001446	84	84	G	A	SNP	.	3185.12	1|1	0|1	0|1	0|1	0|1	.|.	0|1	1|1	0|1	1|1	0|0	0|1	0|1	0|1	1|1	0|1	1|1	0|1	1|1	0,5	9,2	5,3	7,3	6,5	.,.	3,16	0,10	1,4	0,6	4,0	4,7	2,3	4,6	0,1	3,5	0,1	1,3	0,9
Unigene0001446	345	345	G	A	SNP	.	2568.92	.|.	1|1	0|0	0|1	0|1	0|0	0|1	1|1	1|1	1|1	1|1	0|1	1|1	0|1	1|1	0|1	0|0	.|.	0|1	.,.	0,16	10,0	10,2	6,1	5,0	10,1	0,11	0,6	0,6	0,4	11,4	0,3	3,1	0,1	5,5	1,0	.,.	8,12
Unigene0001449	495	495	T	C	SNP	.	2581.74	.|.	.|.	1|1	1|1	0|0	1|1	1|1	.|.	1|1	1|1	0|1	0|0	1|1	1|1	.|.	1|1	.|.	1|1	.|.	.,.	.,.	0,2	0,1	2,0	0,16	0,6	.,.	0,7	0,2	2,8	3,0	0,2	0,8	.,.	0,6	.,.	0,2	.,.
Unigene0001449	496	496	G	A	SNP	.	2581.74	.|.	.|.	1|1	1|1	0|0	1|1	1|1	.|.	1|1	1|1	0|1	0|0	1|1	1|1	.|.	1|1	.|.	1|1	.|.	.,.	.,.	0,2	0,1	2,0	0,16	0,6	.,.	0,7	0,2	2,8	3,0	0,2	0,8	.,.	0,6	.,.	0,2	.,.
Unigene0001449	543	543	G	A	SNP	.	829.25	.|.	.|.	.|.	.|.	0|0	1|1	1|1	.|.	1|1	1|1	0|1	0|0	.|.	1|1	.|.	1|1	.|.	.|.	.|.	.,.	.,.	.,.	.,.	3,0	0,3	0,4	.,.	0,7	0,3	1,1	2,0	.,.	0,1	.,.	0,3	.,.	.,.	.,.
Unigene0001449	593	593	G	A	SNP	.	3503.89	.|.	.|.	1|1	.|.	0|0	1|1	1|1	.|.	1|1	1|1	0|1	0|0	1|1	1|1	.|.	1|1	.|.	.|.	.|.	.,.	.,.	0,2	.,.	5,0	0,24	0,16	.,.	0,14	0,5	5,6	10,0	0,5	0,13	.,.	0,9	.,.	.,.	.,.
Unigene0001459	456	456	G	T	SNP	.	1402.48	0|0	0|1	0|1	0|1	1|1	0|0	0|1	0|0	0|1	0|1	1|1	0|1	1|1	1|1	1|1	0|1	1|1	1|1	1|1	3,0	4,4	1,2	1,2	0,1	2,0	1,1	6,0	2,5	1,2	0,3	1,4	0,2	0,5	0,3	1,2	0,2	0,1	0,2
Unigene0001459	987	987	A	G	SNP	.	1756.63	0|0	1|1	1|1	0|1	1|1	.|.	1|1	0|0	1|1	.|.	1|1	1|1	1|1	1|1	1|1	.|.	1|1	.|.	1|1	1,0	0,4	0,2	2,5	0,4	.,.	0,2	5,0	0,2	.,.	0,2	0,1	0,2	0,9	0,5	.,.	0,6	.,.	0,3
Unigene0001465	1920	1920	A	C	SNP	.	2563.78	1|1	0|1	0|1	0|1	1|1	1|1	0|0	1|1	0|1	.|.	1|1	1|1	0|1	0|1	1|1	1|1	0|1	0|0	0|1	0,3	3,2	8,1	41,13	0,1	0,10	14,1	0,7	2,6	.,.	0,1	0,2	2,4	15,10	0,1	0,1	35,13	1,0	15,4
Unigene0001466	488	488	A	G	SNP	.	62478	1|1	1|1	1|1	1|1	1|1	1|1	1|1	0|1	0|1	0|1	0|1	1|1	1|1	1|1	1|1	1|1	0|1	1|1	0|1	2125	1281	0,56	0,202	0,38	0,93	5,85	18,38	14,48	15,62	27,85	1,50	3,41	0,192	4187	1,52	12,48	0,18	22105
Unigene0001478	134	134	G	T	SNP	.	332.13	0|0	0|1	.|.	1|1	.|.	.|.	0|0	0|0	1|1	.|.	0|1	1|1	1|1	.|.	1|1	0|0	.|.	.|.	1|1	1,0	1,1	.,.	0,1	.,.	.,.	2,0	3,0	0,1	.,.	1,1	0,1	0,2	.,.	0,1	1,0	.,.	.,.	0,2
Unigene0001478	574	574	C	T	SNP	.	2509.62	0|1	0|0	1|1	1|1	0|1	0|1	1|1	0|1	0|1	1|1	1|1	0|1	0|0	0|1	1|1	0|1	1|1	0|0	.|.	2,6	5,0	0,3	0,8	2,4	2,2	0,14	1,13	11,5	0,4	0,2	4,1	2,0	3,3	0,1	3,1	0,3	1,0	.,.
Unigene0001505	104	104	T	G	SNP	.	4013.15	1|1	0|1	0|1	0|1	1|1	0|1	0|1	1|1	1|1	0|1	0|1	1|1	0|1	0|0	0|1	0|1	1|1	0|1	0|1	0,18	8,25	1,1	5,9	0,1	2,9	1,1	0,5	0,1	4,5	3,13	0,1	2,2	3,0	4,5	1,7	0,2	1,7	2,10
Unigene0001506	63	63	T	G	SNP	.	1208.14	.|.	0|1	.|.	1|1	1|1	1|1	.|.	1|1	0|1	0|1	1|1	.|.	0|1	1|1	0|0	1|1	0|1	1|1	0|1	.,.	3,5	.,.	0,1	0,3	0,2	.,.	0,1	2,3	2,3	0,1	.,.	2,1	0,3	2,0	0,1	3,5	0,1	2,4
Unigene0001506	819	819	C	T	SNP	.	796.08	1|1	0|0	.|.	1|1	1|1	1|1	1|1	.|.	0|1	0|0	0|1	1|1	0|1	.|.	0|1	1|1	0|1	0|0	0|1	0,1	11,0	.,.	0,2	0,2	0,1	0,1	.,.	4,1	2,0	0,1	0,2	5,1	.,.	1,1	0,1	1,3	2,0	3,4
Unigene0001506	825	825	C	G	SNP	.	711.25	1|1	0|0	.|.	1|1	1|1	1|1	1|1	.|.	0|1	0|0	0|1	1|1	0|1	.|.	0|1	1|1	0|1	0|0	0|1	0,1	12,0	.,.	0,2	0,1	0,1	0,1	.,.	3,1	2,0	1,1	0,1	5,1	.,.	1,1	0,1	1,3	2,0	3,4
Unigene0001511	222	222	A	G	SNP	.	6737.19	0|1	1|1	0|1	0|1	1|1	1|1	0|1	1|1	0|1	1|1	1|1	0|1	1|1	0|1	1|1	0|1	0|1	1|1	0|1	2,6	0,14	1,5	4,14	0,9	0,8	2,14	0,16	3,10	0,10	0,8	1,4	0,8	4,13	0,4	1,5	2,12	0,4	3,13
Unigene0001516	200	200	A	T	SNP	.	857.21	1|1	0|1	1|1	0|1	.|.	0|1	1|1	1|1	0|0	.|.	0|1	.|.	1|1	0|0	1|1	.|.	0|1	.|.	0|0	0,1	1,3	0,3	4,1	.,.	1,1	0,3	0,1	2,0	.,.	6,4	.,.	0,4	5,0	0,1	.,.	3,2	.,.	1,0
Unigene0001555	406	406	A	C	SNP	.	1428.15	0|0	0|1	.|.	0|1	0|1	1|1	1|1	1|1	0|1	1|1	1|1	.|.	1|1	0|0	0|1	.|.	0|0	1|1	0|1	1,0	2,5	.,.	1,3	3,7	0,1	0,4	0,5	10,3	0,1	0,6	.,.	0,5	1,0	1,1	.,.	1,0	0,2	2,1
Unigene0001555	435	435	A	G	SNP	.	1199.15	0|0	1|1	1|1	1|1	0|1	1|1	1|1	1|1	0|1	1|1	1|1	.|.	1|1	.|.	1|1	.|.	0|0	1|1	0|1	1,0	0,4	0,1	0,1	1,5	0,1	0,4	0,5	1,1	0,2	0,4	.,.	0,2	.,.	0,1	.,.	1,0	0,3	1,2
Unigene0001555	1133	1133	C	G	SNP	.	69441.1	0|1	0|1	0|1	1|1	0|1	0|1	0|1	0|1	0|1	1|1	0|1	0|1	1|1	1|1	0|1	0|1	1|1	0|1	1|1	39,80	169132	43,43	0,94	45,73	27,77	52,54	42125	47239	0,255	77126	11,21	0,96	0,56	103,64	39,39	2,66	21,19	0,178
Unigene0001555	1534	1534	T	A	SNP	.	8159.73	0|1	.|.	.|.	1|1	0|0	.|.	1|1	0|1	1|1	1|1	1|1	0|0	1|1	0|1	1|1	1|1	1|1	1|1	1|1	44,39	.,.	.,.	0,5	40,0	.,.	0,5	121,28	0,15	0,47	0,21	14,0	0,12	33,8	0,12	0,12	0,4	0,3	0,22
Unigene0001558	1061	1061	G	A	SNP	.	6479.43	1|1	0|1	1|1	0|0	0|1	.|.	0|1	1|1	0|1	0|0	0|0	0|1	1|1	0|1	1|1	0|1	0|1	1|1	0|1	0,5	6,8	0,1	2,0	12,20	.,.	2,1	0,5	15,84	10,0	7,0	9,10	0,14	2,4	0,5	3,2	2,1	0,11	17,21
Unigene0001559	406	406	G	T	SNP	.	894.57	0|1	1|1	0|0	0|0	0|1	0|1	0|1	1|1	1|1	0|1	1|1	1|1	0|0	0|1	0|0	0|1	0|1	1|1	0|0	1,1	0,3	2,0	4,0	1,1	2,1	8,1	0,6	0,1	1,1	0,1	0,2	3,0	4,1	1,0	2,3	4,1	0,3	3,0
Unigene0001560	1127	1127	T	C	SNP	.	5472.86	0|1	0|1	1|1	0|1	0|1	0|1	1|1	1|1	0|1	0|1	0|1	0|1	1|1	1|1	0|1	1|1	0|1	1|1	0|1	11,2	21,5	0,10	5,6	4,5	2,3	0,9	1,18	4,9	3,11	6,6	5,8	0,7	0,3	2,5	0,8	8,7	0,6	10,6
Unigene0001563	570	570	G	C	SNP	.	4269.36	1|1	1|1	0|1	0|1	1|1	1|1	0|1	1|1	1|1	1|1	0|1	1|1	0|1	0|1	1|1	0|1	0|1	0|1	1|1	0,7	0,9	2,8	2,10	0,7	0,7	5,5	0,2	0,8	0,6	4,6	0,7	2,2	4,4	0,1	3,3	2,11	2,3	1,15
Unigene0001569	835	835	G	T	SNP	.	2325.88	0|1	1|1	1|1	0|1	1|1	1|1	0|1	1|1	0|1	0|0	0|1	0|1	0|1	0|1	0|1	0|1	0|1	1|1	0|1	2,4	0,5	0,2	10,6	0,2	0,2	4,3	0,3	1,6	2,0	2,9	1,2	2,6	5,5	10,4	2,6	3,3	0,1	3,3
Unigene0001569	861	861	A	C	SNP	.	2626.01	0|1	1|1	1|1	0|1	1|1	1|1	0|1	1|1	0|1	.|.	0|1	1|1	1|1	1|1	0|1	0|1	0|1	1|1	0|1	1,3	0,4	0,2	7,3	0,1	0,1	1,4	0,3	1,5	.,.	2,7	0,5	0,7	0,7	2,8	1,5	2,2	0,2	2,4
Unigene0001579	210	210	A	C	SNP	.	42728.2	1|1	1|1	1|1	0|1	1|1	0|1	1|1	1|1	0|1	1|1	1|1	1|1	0|0	0|1	0|1	0|1	1|1	0|1	1|1	0,112	0,169	0,51	116,23	0,34	31,76	0,54	0,95	10,44	0,41	0,82	0,53	132,7	174,41	63,29	34,8	2102	25,4	0,42
Unigene0001579	261	261	A	G	SNP	.	765.7	.|.	.|.	.|.	0|0	1|1	0|0	1|1	1|1	0|0	1|1	1|1	1|1	0|0	0|0	0|0	0|0	1|1	0|0	1|1	.,.	.,.	.,.	130,0	0,1	35,0	0,2	0,4	16,1	0,1	0,4	0,2	128,0	155,1	66,0	37,0	0,8	27,0	0,2
Unigene0001579	333	333	A	G	SNP	.	15771.7	1|1	0|0	0|1	0|0	1|1	0|1	0|0	1|1	0|0	0|0	.|.	1|1	0|0	0|0	0|1	0|0	1|1	0|1	1|1	0,118	85,5	4,4	211,2	0,18	49,54	46,2	0,38	64,3	21,0	.,.	0,17	160,2	209,3	96,37	47,2	0,98	24,16	0,31
Unigene0001579	717	717	A	G	SNP	.	21570.7	1|1	1|1	0|1	0|1	1|1	1|1	0|0	0|1	0|1	1|1	1|1	1|1	1|1	0|1	1|1	1|1	1|1	1|1	1|1	0,28	0,1	5,6	10,75	0,22	0,39	9,0	5,19	17,12	0,1	0,17	0,20	0,115	17,80	0,32	2,29	0,42	0,29	0,13
Unigene0001579	751	751	C	T	SNP	.	9158.86	1|1	0|1	0|1	0|1	0|1	1|1	0|0	1|1	1|1	0|1	0|1	0|1	1|1	0|1	0|1	0|1	0|1	1|1	0|1	0,22	11,1	4,4	5,28	3,6	1,17	7,0	0,24	0,8	1,1	6,18	6,5	0,34	17,32	1,10	2,12	5,14	0,11	4,4
Unigene0001585	493	493	C	T	SNP	.	1589.75	0|1	0|1	1|1	0|1	0|1	0|1	1|1	0|0	0|1	0|0	0|1	0|0	0|0	1|1	.|.	1|1	1|1	1|1	1|1	3,2	6,2	0,3	7,7	1,1	2,4	0,3	3,0	1,5	1,0	1,1	1,0	2,0	0,9	.,.	0,1	0,3	0,1	0,5
Unigene0001604	2523	2523	T	C	SNP	.	4403.98	1|1	0|1	0|1	0|1	1|1	0|1	0|1	1|1	1|1	1|1	.|.	1|1	0|1	0|1	0|1	.|.	1|1	1|1	0|1	0,10	7,12	1,6	4,16	0,4	1,8	1,11	0,1	0,8	0,1	.,.	0,2	1,3	12,7	2,4	.,.	1,14	0,4	2,11
Unigene0001604	2946	2946	C	T	SNP	.	2827.06	0|1	0|1	1|1	0|1	.|.	1|1	1|1	.|.	0|1	.|.	0|1	1|1	1|1	0|1	0|1	1|1	1|1	0|0	1|1	4,9	5,2	0,4	3,12	.,.	0,9	0,1	.,.	1,5	.,.	2,1	0,3	0,2	4,5	1,3	0,1	0,8	1,0	0,7
Unigene0001605	188	188	A	G	SNP	.	1230.2	1|1	0|1	1|1	1|1	1|1	.|.	1|1	1|1	0|1	0|1	.|.	.|.	0|1	1|1	0|1	1|1	0|0	0|1	0|0	0,2	2,2	0,7	0,1	0,3	.,.	0,3	0,4	4,2	3,2	.,.	.,.	3,2	0,2	2,2	0,1	4,0	1,3	1,0
Unigene0001633	474	474	A	G	SNP	.	18603.8	0|1	0|1	0|1	0|1	1|1	0|1	1|1	1|1	1|1	0|1	1|1	1|1	0|1	0|1	1|1	1|1	0|1	0|1	0|1	17,26	15,27	5,26	7,54	0,21	5,8	0,24	0,27	0,56	12,22	0,22	0,23	3,13	6,48	0,37	0,22	9,44	1,11	8,14
Unigene0001633	9031	9031	A	C	SNP	.	3886.49	0|1	1|1	.|.	0|1	1|1	1|1	0|1	0|1	1|1	.|.	.|.	1|1	1|1	0|1	.|.	1|1	1|1	1|1	1|1	6,6	0,17	.,.	7,7	0,6	0,6	3,14	4,6	0,8	.,.	.,.	0,7	0,2	1,12	.,.	0,5	0,7	0,3	0,3
Unigene0001633	9515	9515	A	G	SNP	.	355.92	.|.	0|0	.|.	.|.	1|1	0|1	0|1	.|.	1|1	1|1	.|.	0|0	.|.	.|.	.|.	1|1	1|1	.|.	1|1	.,.	3,0	.,.	.,.	0,1	1,1	1,2	.,.	0,2	0,1	.,.	1,0	.,.	.,.	.,.	0,1	0,1	.,.	0,2
Unigene0001635	789	789	C	T	SNP	.	14041.6	1|1	0|1	1|1	1|1	1|1	1|1	0|1	1|1	0|1	1|1	1|1	1|1	0|1	1|1	1|1	0|1	0|1	1|1	0|1	0,39	6,34	0,11	0,22	0,16	0,7	8,24	0,29	9,28	0,27	0,12	0,13	10,9	0,25	2,15	12,15	6,20	0,11	3,16
Unigene0001635	1280	1280	C	T	SNP	.	4791.18	1|1	0|1	0|1	0|1	0|1	1|1	1|1	1|1	0|1	0|1	0|1	0|1	1|1	1|1	0|1	1|1	0|1	1|1	0|1	0,16	3,10	1,9	4,9	1,4	0,2	0,10	0,4	5,9	1,3	2,1	1,5	0,3	0,14	4,7	0,5	5,10	0,2	3,3
Unigene0001640	513	513	C	T	SNP	.	14018.1	1|1	0|1	0|1	1|1	0|1	0|1	1|1	1|1	1|1	0|1	1|1	0|1	1|1	0|1	1|1	0|1	0|1	1|1	0|1	0,20	4,35	9,7	0,13	5,24	4,8	1,25	0,67	2,47	3,7	0,18	1,4	0,8	4,10	0,14	1,7	2,9	0,9	10,28
Unigene0001645	301	301	A	G	SNP	.	6953.37	1|1	0|1	0|1	1|1	0|1	1|1	1|1	1|1	0|1	1|1	0|1	0|1	0|1	0|1	1|1	0|1	1|1	1|1	1|1	0,3	2,3	5,13	0,2	11,29	0,6	0,1	0,33	15,13	0,2	3,5	28,13	14,4	9,7	0,6	4,7	0,2	0,2	0,28
Unigene0001645	946	946	T	C	SNP	.	10382.4	1|1	1|1	0|1	0|1	0|1	1|1	0|1	1|1	1|1	1|1	.|.	0|1	1|1	1|1	1|1	0|1	1|1	1|1	1|1	0,1	0,12	22,20	7,1	36,24	0,12	10,5	0,56	0,32	0,8	.,.	48,19	0,11	0,13	0,8	2,13	0,1	0,7	0,41
Unigene0001645	977	977	A	G	SNP	.	8091.29	1|1	1|1	0|1	0|1	0|1	1|1	0|1	1|1	1|1	0|1	1|1	0|1	1|1	1|1	1|1	0|1	1|1	1|1	1|1	0,1	0,11	23,17	7,2	40,16	0,9	9,5	0,33	0,31	1,5	0,2	46,13	0,6	0,10	0,4	3,7	0,1	0,4	0,40
Unigene0001647	189	189	A	C	SNP	.	4660.72	1|1	0|1	1|1	0|1	1|1	0|1	0|1	1|1	0|1	0|0	1|1	1|1	1|1	0|1	0|1	1|1	1|1	1|1	1|1	0,3	7,7	0,1	1,5	0,3	1,7	2,19	0,8	1,8	1,0	0,14	0,3	0,9	2,9	3,4	0,14	0,1	0,4	0,11
Unigene0001654	286	286	C	T	SNP	.	9967.22	1|1	0|1	0|1	0|0	0|1	1|1	0|1	0|1	1|1	0|1	0|0	0|1	1|1	1|1	1|1	0|1	0|1	0|1	0|1	0,8	77,18	10,6	22,0	22,16	0,3	26,46	22,26	3,52	54,12	57,2	11,4	0,15	0,18	1,37	14,15	19,4	13,15	37,10
Unigene0001654	1075	1076	TC	-	Deletion	.	11687.8	0|1	0|0	1|1	0|1	0|1	1|1	1|1	0|0	1|1	0|1	1|1	0|1	0|1	1|1	0|0	0|1	0|0	0|1	0|0	13,11	78,3	0,29	10,3	13,23	1,7	3,77	53,1	2,58	87,40	2,29	5,2	31,3	0,10	17,0	39,36	7,0	88,31	20,0
Unigene0001656	122	122	A	G	SNP	.	1672.82	1|1	0|1	0|1	0|1	0|0	1|1	1|1	.|.	1|1	1|1	0|0	0|1	0|1	0|1	1|1	1|1	0|1	.|.	1|1	0,3	3,4	1,3	1,2	2,0	0,2	0,1	.,.	0,3	0,2	3,0	1,1	3,1	2,9	0,2	0,1	1,8	.,.	0,8
Unigene0001660	660	660	A	G	SNP	.	11613.9	1|1	0|1	1|1	1|1	1|1	0|1	1|1	1|1	0|1	0|1	0|1	1|1	0|1	0|1	0|1	1|1	0|1	0|0	0|1	0,20	7,42	0,14	.	0,12	6,22	0,11	0,31	5,3	5,6	8,16	0,4	4,13	4,0	1,7	0,3	4,19	7,0	9,44
Unigene0001660	666	666	A	G	SNP	.	10650.7	1|1	0|1	1|1	.|.	1|1	0|1	1|1	1|1	0|1	0|1	0|1	1|1	0|1	0|0	0|1	1|1	0|1	0|0	0|1	0,22	7,40	0,13	.,.	0,10	5,22	0,8	0,31	5,1	4,6	8,14	0,3	4,13	4,0	1,4	0,3	4,17	7,0	9,43
Unigene0001660	1451	1451	A	G	SNP	.	31473.5	1|1	0|1	0|1	0|1	0|1	1|1	0|1	1|1	1|1	1|1	0|1	0|1	1|1	0|1	1|1	1|1	1|1	1|1	1|1	0,49	61,73	26,35	61,38	43,87	0,36	76,39	0,59	0,64	0,41	21,25	15,34	0,71	30,35	0,48	0,30	0,49	0,34	0,82
Unigene0001666	173	173	A	T	SNP	.	1340.97	.|.	1|1	1|1	1|1	0|1	0|1	0|1	0|0	0|1	.|.	1|1	1|1	1|1	0|1	.|.	1|1	0|1	1|1	1|1	.,.	0,6	0,1	0,1	3,2	1,2	1,1	1,0	1,3	.,.	0,3	0,1	0,4	1,5	.,.	0,2	2,3	0,1	0,2
Unigene0001666	344	344	C	T	SNP	.	1009.81	0|1	1|1	0|1	0|1	1|1	1|1	.|.	.|.	0|1	.|.	.|.	1|1	0|1	1|1	.|.	1|1	0|1	.|.	1|1	3,2	0,1	1,1	1,3	0,1	0,3	.,.	.,.	1,1	.,.	.,.	0,1	1,2	0,3	.,.	0,2	1,3	.,.	0,4
Unigene0001667	57	57	A	G	SNP	.	1278.17	.|.	1|1	1|1	1|1	1|1	0|1	0|1	1|1	1|1	.|.	1|1	1|1	0|1	0|0	0|0	0|0	0|1	1|1	0|1	.,.	0,1	0,3	0,5	0,2	1,1	1,1	0,2	0,3	.,.	0,2	0,3	1,2	2,0	1,0	1,0	1,5	0,1	1,4
Unigene0001667	718	718	C	T	SNP	.	3835.29	0|0	1|1	0|1	0|1	0|1	1|1	1|1	0|1	0|1	.|.	1|1	1|1	1|1	1|1	1|1	1|1	0|1	1|1	0|1	2,0	0,13	2,7	1,8	1,1	0,2	0,3	2,1	1,8	.,.	0,2	0,3	0,6	0,10	0,6	0,3	1,9	0,1	2,6
Unigene0001667	750	750	C	T	SNP	.	4229.08	0|0	1|1	0|1	0|1	0|1	1|1	1|1	0|0	0|1	1|1	1|1	1|1	1|1	1|1	1|1	1|1	0|1	1|1	0|1	1,0	0,19	2,8	1,6	1,5	0,5	0,5	1,0	2,8	0,1	0,2	0,2	0,8	0,10	0,6	0,1	1,10	0,1	2,7
Unigene0001667	894	894	C	G	SNP	.	893.43	1|1	0|1	0|1	1|1	.|.	0|1	0|1	1|1	0|1	0|0	1|1	1|1	.|.	0|1	1|1	.|.	0|1	1|1	1|1	0,2	1,3	1,2	0,2	.,.	1,1	2,3	0,1	1,1	1,0	0,5	0,2	.,.	2,1	0,1	.,.	1,1	0,1	0,1
Unigene0001668	523	523	G	A	SNP	.	2442.86	1|1	1|1	0|1	0|1	0|1	0|1	1|1	1|1	0|1	0|1	1|1	1|1	0|1	1|1	0|1	0|0	1|1	.|.	.|.	0,3	0,4	2,1	1,6	1,1	2,2	0,2	0,7	3,4	1,2	0,2	0,3	1,2	0,5	1,2	1,0	0,2	.,.	.,.
Unigene0001668	542	542	G	A	SNP	.	4030.7	1|1	1|1	0|1	1|1	0|1	0|1	1|1	1|1	0|1	0|1	1|1	1|1	0|1	1|1	0|1	0|0	1|1	1|1	1|1	0,8	0,6	2,2	0,10	1,2	1,7	0,8	0,11	1,9	1,3	0,5	0,2	1,2	0,8	1,1	1,0	0,8	0,1	0,5
Unigene0001668	2223	2223	T	C	SNP	.	1679.89	0|0	0|1	1|1	0|1	1|1	0|1	1|1	0|0	0|1	1|1	1|1	1|1	1|1	1|1	1|1	1|1	0|1	1|1	0|1	1,0	2,5	0,1	1,3	1,4	1,1	0,7	3,0	3,2	0,1	0,1	0,2	0,3	0,5	0,1	0,1	1,2	0,2	2,8
Unigene0001669	478	478	A	G	SNP	.	3936.23	1|1	1|1	0|1	0|1	1|1	0|1	1|1	1|1	1|1	1|1	0|1	1|1	1|1	0|1	0|1	1|1	1|1	1|1	1|1	0,2	0,15	5,5	9,17	0,6	1,4	0,7	0,3	0,2	0,2	4,4	0,3	0,3	8,7	2,2	0,4	0,11	0,1	0,6
Unigene0001669	706	706	A	T	SNP	.	1672.79	1|1	.|.	0|1	0|1	1|1	1|1	0|1	.|.	.|.	.|.	0|0	1|1	1|1	0|1	.|.	1|1	1|1	1|1	1|1	0,1	.,.	8,2	6,13	0,2	0,2	6,2	.,.	.,.	.,.	10,0	0,4	0,2	15,2	.,.	0,4	0,5	0,1	0,6
Unigene0001669	850	850	C	T	SNP	.	1869.89	0|1	1|1	0|0	0|0	1|1	.|.	0|0	1|1	1|1	.|.	0|1	1|1	1|1	0|1	1|1	.|.	.|.	1|1	.|.	1,3	0,8	9,0	15,1	0,2	.,.	2,0	0,2	0,6	.,.	4,1	0,2	0,6	13,14	0,6	.,.	.,.	0,4	.,.
Unigene0001669	885	885	T	G	SNP	.	2412.55	0|1	0|1	0|0	0|0	0|1	1|1	0|0	1|1	1|1	.|.	0|1	0|0	1|1	0|1	1|1	.|.	0|0	1|1	1|1	2,4	5,15	11,0	14,1	1,3	0,2	4,0	0,5	0,8	.,.	6,2	1,0	0,6	25,14	0,5	.,.	1,0	0,4	0,1
Unigene0001670	277	277	A	G	SNP	.	528.12	1|1	1|1	.|.	0|1	1|1	1|1	0|0	.|.	.|.	.|.	0|0	.|.	1|1	1|1	0|1	0|0	1|1	0|0	1|1	0,2	0,1	.,.	1,1	0,1	0,1	1,0	.,.	.,.	.,.	4,0	.,.	0,1	0,2	8,2	3,0	0,3	1,0	0,1
Unigene0001687	148	148	T	C	SNP	.	14283.8	0|0	0|1	1|1	0|0	.|.	0|0	1|1	0|1	1|1	1|1	1|1	0|0	1|1	0|1	.|.	1|1	1|1	1|1	1|1	199,0	3,9	0,5	11,0	.,.	2,0	0,40	60,20	0,27	0,1	0,5	1,0	0,18	3,2	.,.	0,1	0,55	0,43	0,136
Unigene0001687	616	616	C	T	SNP	.	7130.27	0|0	1|1	0|0	0|0	0|1	0|1	1|1	0|1	1|1	1|1	0|0	0|1	1|1	0|1	0|1	1|1	1|1	1|1	1|1	25,0	0,2	1,0	15,1	4,2	1,2	0,5	27,4	0,17	0,1	1,0	2,1	0,12	6,8	1,2	0,3	2,28	0,34	0,66
Unigene0001693	225	225	C	T	SNP	.	1899.85	0|1	0|1	.|.	1|1	0|0	1|1	0|1	0|0	0|1	0|1	0|1	0|1	.|.	1|1	1|1	0|0	.|.	1|1	1|1	6,3	8,15	.,.	0,1	3,0	0,6	1,1	1,0	1,1	5,4	2,2	1,2	.,.	0,1	0,18	1,0	.,.	0,1	0,1
Unigene0001699	127	127	A	G	SNP	.	1530.55	1|1	0|0	0|1	1|1	0|0	1|1	0|1	.|.	1|1	0|0	0|0	0|1	0|1	1|1	0|1	0|1	1|1	1|1	1|1	0,1	2,0	1,3	0,4	1,0	0,5	1,0	.,.	0,4	2,0	1,0	1,1	1,3	0,5	1,3	1,1	0,1	0,3	0,2
Unigene0001699	136	136	C	T	SNP	.	1668.43	1|1	0|0	0|1	1|1	0|1	1|1	0|1	.|.	1|1	0|0	0|0	0|1	0|1	1|1	0|1	0|1	1|1	1|1	1|1	0,1	2,0	1,3	0,6	1,1	0,7	1,1	.,.	0,3	2,0	1,0	1,1	1,3	0,7	1,1	1,1	0,1	0,3	0,2
Unigene0001699	493	493	G	A	SNP	.	1261.76	1|1	.|.	1|1	1|1	1|1	1|1	.|.	.|.	1|1	1|1	.|.	1|1	1|1	0|1	0|0	1|1	0|1	1|1	0|1	0,2	.,.	0,2	0,3	0,1	0,2	.,.	.,.	0,2	0,1	.,.	0,3	0,2	1,5	1,0	0,2	1,1	0,1	1,3
Unigene0001710	2829	2829	A	G	SNP	.	4566.59	1|1	0|1	0|0	1|1	0|0	1|1	0|1	1|1	1|1	.|.	0|1	0|1	0|1	0|1	.|.	0|1	0|1	1|1	0|1	0,8	5,12	3,0	0,10	4,0	0,9	10,4	0,13	0,10	.,.	3,5	1,3	4,2	5,9	.,.	1,3	1,9	0,2	8,15
Unigene0001716	254	254	-	AT	Insertion	.	5694.68	1|1	1|1	1|1	1|1	1|1	1|1	1|1	0|0	1|1	0|1	1|1	1|1	0|1	0|1	0|1	0|1	0|1	0|1	0|1	0,17	0,10	0,3	0,6	0,2	0,2	0,3	4,0	0,15	2,3	0,7	0,1	5,11	10,16	3,10	1,6	4,14	2,2	3,7
Unigene0001716	1756	1756	A	T	SNP	.	1396.74	1|1	.|.	.|.	0|1	1|1	1|1	0|1	1|1	0|0	1|1	1|1	1|1	.|.	0|1	.|.	0|1	0|1	0|0	0|1	0,1	.,.	.,.	7,9	0,1	0,1	2,1	0,2	5,1	0,1	0,4	0,2	.,.	18,15	.,.	1,3	5,1	1,0	1,1
Unigene0001717	486	486	T	C	SNP	.	656.13	0|0	1|1	1|1	1|1	0|1	1|1	1|1	0|0	0|0	0|0	.|.	.|.	0|0	1|1	0|1	.|.	0|0	.|.	0|0	9,0	0,1	0,3	0,5	1,1	0,4	0,1	9,0	4,0	2,0	.,.	.,.	3,0	0,4	1,1	.,.	7,0	.,.	2,0
Unigene0001717	829	829	A	G	SNP	.	871.47	0|1	1|1	1|1	.|.	1|1	1|1	1|1	0|0	0|1	.|.	1|1	1|1	1|1	1|1	1|1	1|1	0|1	0|1	0|0	4,3	0,1	0,1	.,.	0,1	0,1	1,3	8,0	11,3	.,.	0,2	0,1	0,2	0,2	0,2	0,2	1,1	3,1	1,0
Unigene0001717	852	852	C	T	SNP	.	519.94	0|1	.|.	.|.	.|.	1|1	.|.	0|1	0|0	0|1	1|1	1|1	1|1	0|0	1|1	1|1	0|1	0|0	0|0	0|0	5,3	.,.	.,.	.,.	0,1	.,.	1,2	7,0	11,2	0,3	0,1	0,1	1,0	0,1	0,1	1,1	1,0	4,0	1,0
Unigene0001717	1076	1076	C	G	SNP	.	2431.32	1|1	0|1	0|1	0|1	0|1	0|0	0|1	1|1	0|1	1|1	0|0	0|1	1|1	0|1	1|1	0|1	1|1	1|1	1|1	0,6	3,8	6,1	1,3	4,1	7,0	2,3	0,5	1,4	0,4	3,0	1,4	0,2	7,9	0,10	1,3	0,2	0,3	0,1
Unigene0001718	319	319	A	T	SNP	.	6169.43	1|1	0|1	0|1	0|1	0|1	0|1	0|1	1|1	0|1	0|1	1|1	0|1	1|1	0|1	1|1	1|1	0|1	1|1	0|1	0,8	5,6	4,6	4,16	1,8	6,1	1,8	0,6	3,16	3,12	0,6	1,6	0,5	3,17	0,12	0,7	8,15	0,3	4,9
Unigene0001718	357	357	C	T	SNP	.	5512.18	0|1	0|1	1|1	1|1	1|1	1|1	1|1	0|1	0|1	0|1	1|1	1|1	1|1	0|1	0|1	1|1	0|1	1|1	0|1	2,1	3,5	0,10	1,15	0,6	0,5	0,13	3,3	4,12	4,5	0,7	0,4	0,8	2,13	3,8	0,8	2,16	0,3	1,11
Unigene0001729	157	157	C	T	SNP	.	1831.87	1|1	0|1	1|1	0|1	0|0	0|1	0|0	1|1	.|.	0|1	1|1	.|.	0|0	0|1	1|1	0|1	1|1	.|.	0|0	0,2	3,6	0,8	7,4	2,0	2,1	3,0	0,3	.,.	2,10	0,3	.,.	2,0	5,5	0,5	3,3	0,3	.,.	3,0
Unigene0001732	3931	3931	T	-	Deletion	.	629.93	.|.	0|1	1|1	1|1	1|1	0|0	1|1	0|1	0|0	0|0	1|1	1|1	0|1	1|1	.|.	0|0	.|.	0|1	0|1	.,.	6,2	0,2	0,1	0,2	1,0	0,2	4,2	3,0	1,0	0,3	0,1	2,1	0,3	.,.	3,0	.,.	4,1	1,1
Unigene0001733	1767	1767	C	T	SNP	.	8549.31	.|.	1|1	1|1	1|1	0|1	0|1	1|1	.|.	1|1	1|1	1|1	0|1	0|1	1|1	0|0	1|1	1|1	1|1	1|1	.,.	0,13	0,13	0,24	1,1	1,9	0,5	.,.	0,14	0,10	0,11	1,1	1,8	0,32	2,0	0,6	1,17	0,4	1,28
Unigene0001736	382	382	C	T	SNP	.	1046.53	1|1	1|1	1|1	0|1	0|1	1|1	0|0	1|1	0|1	0|0	0|1	1|1	1|1	0|1	1|1	1|1	0|1	.|.	0|1	0,4	0,1	0,3	1,1	1,2	0,2	2,0	0,2	11,3	4,0	2,3	0,4	0,1	2,4	0,4	0,1	8,2	.,.	4,1
Unigene0001744	107	107	A	G	SNP	.	4757.58	0|0	0|1	1|1	1|1	0|1	0|1	1|1	1|1	1|1	0|1	1|1	0|1	0|1	0|1	0|1	1|1	0|1	0|1	0|1	1,0	6,9	0,5	0,9	1,7	2,2	0,12	0,3	0,15	2,4	0,12	3,3	4,6	1,6	1,2	0,9	5,9	2,1	2,10
Unigene0001754	126	126	C	T	SNP	.	1552.61	1|1	0|1	1|1	0|1	0|0	0|0	0|1	.|.	1|1	0|1	0|1	0|1	0|1	0|1	1|1	.|.	1|1	1|1	1|1	0,1	3,2	0,2	6,8	1,0	1,0	2,1	.,.	0,2	1,0	4,2	3,0	1,1	14,5	0,4	.,.	0,2	0,2	.
Unigene0001754	136	136	T	C	SNP	.	2636.64	1|1	0|1	1|1	0|1	0|0	0|1	0|1	.|.	0|1	0|1	0|1	0|1	0|1	0|1	1|1	.|.	1|1	1|1	1|1	0,1	4,4	0,4	6,13	1,0	2,2	3,3	.,.	1,5	1,1	4,3	3,3	1,1	15,10	0,9	.,.	0,4	0,3	0,1
Unigene0001754	643	643	A	T	SNP	.	1324.8	1|1	0|1	0|1	0|1	0|0	0|1	0|0	1|1	0|1	1|1	1|1	0|0	1|1	0|1	1|1	1|1	1|1	.|.	1|1	0,2	9,6	4,1	7,4	3,0	4,1	2,0	0,2	1,3	0,2	0,1	7,0	0,3	6,4	0,3	0,1	0,2	.,.	0,2
Unigene0001754	823	823	G	T	SNP	.	1228.18	0|1	1|1	1|1	0|1	1|1	1|1	0|1	0|0	0|0	1|1	1|1	0|1	.|.	1|1	1|1	.|.	0|1	.|.	.|.	7,4	0,5	0,4	1,6	0,4	0,1	1,3	4,0	2,0	0,1	0,1	2,1	.,.	0,4	.	.,.	1,0	.,.	.,.
Unigene0001760	1415	1415	A	G	SNP	.	10803.9	1|1	0|1	0|1	0|1	.|.	0|1	0|1	1|1	1|1	1|1	1|1	1|1	1|1	1|1	0|1	0|1	1|1	1|1	1|1	0,30	21,56	4,1	14,6	.,.	5,7	8,2	0,25	0,20	0,16	0,16	0,2	0,17	0,4	2,6	8,6	0,25	0,8	0,15
Unigene0001764	486	486	A	T	SNP	.	1125.2	1|1	1|1	0|0	1|1	0|1	1|1	0|1	1|1	0|0	1|1	0|1	0|1	1|1	0|1	.|.	0|1	0|1	.|.	1|1	0,6	0,1	1,0	0,1	2,1	0,2	4,4	0,3	1,0	0,3	1,1	5,1	0,2	4,2	.,.	3,3	4,1	.,.	0,1
Unigene0001764	775	775	A	G	SNP	.	677.12	0|1	0|1	0|0	0|1	0|0	1|1	1|1	0|1	0|0	1|1	1|1	0|1	1|1	0|1	0|0	1|1	1|1	1|1	0|0	5,2	1,1	1,0	4,2	1,0	0,1	0,1	2,1	1,0	0,1	0,2	1,1	0,1	3,5	3,0	0,1	0,2	0,1	1,0
Unigene0001767	1108	1108	A	G	SNP	.	2783.7	0|1	1|1	1|1	0|1	1|1	0|1	0|1	1|1	0|1	.|.	1|1	.|.	1|1	0|1	0|1	1|1	1|1	.|.	1|1	6,17	0,8	0,2	2,11	0,2	1,1	1,2	0,1	12,2	.,.	0,1	.,.	0,1	3,8	2,3	0,4	0,6	.,.	0,5
Unigene0001777	135	135	T	A	SNP	.	828.22	.|.	.|.	.|.	.|.	1|1	.|.	1|1	.|.	0|0	.|.	.|.	1|1	0|0	1|1	.|.	0|0	1|1	.|.	1|1	.,.	.,.	.,.	.,.	0,3	.,.	0,1	.,.	14,0	.,.	.,.	0,2	59,0	0,4	.,.	14,0	0,7	.,.	0,2
Unigene0001777	141	141	G	A	SNP	.	865.22	.|.	.|.	.|.	.|.	1|1	.|.	1|1	.|.	0|0	.|.	.|.	1|1	0|0	1|1	.|.	0|0	1|1	.|.	1|1	.,.	.,.	.,.	.,.	0,3	.,.	0,2	.,.	14,0	.,.	.,.	0,2	58,0	0,4	.,.	15,0	0,8	.,.	0,2
Unigene0001777	324	324	T	C	SNP	.	836.63	1|1	1|1	.|.	.|.	1|1	.|.	1|1	.|.	0|1	.|.	.|.	.|.	0|0	1|1	0|0	0|0	1|1	.|.	.|.	0,1	0,1	.,.	.,.	0,2	.,.	0,4	.,.	6,1	.,.	.,.	.,.	75,3	0,5	3,0	5,0	0,7	.,.	.,.
Unigene0001777	325	325	G	A	SNP	.	836.63	1|1	1|1	.|.	.|.	1|1	.|.	1|1	.|.	0|1	.|.	.|.	.|.	0|0	1|1	0|0	0|0	1|1	.|.	.|.	0,1	0,1	.,.	.,.	0,2	.,.	0,4	.,.	6,1	.,.	.,.	.,.	74,3	0,5	3,0	5,0	0,7	.,.	.,.
Unigene0001777	636	636	C	T	SNP	.	557.67	1|1	1|1	.|.	.|.	1|1	.|.	1|1	1|1	0|1	.|.	.|.	.|.	0|0	.|.	.|.	0|0	1|1	.|.	1|1	0,3	0,3	.,.	.,.	0,1	.,.	0,1	0,2	2,1	.,.	.,.	.,.	62,0	.,.	.,.	3,0	0,3	.,.	0,1
Unigene0001777	971	971	C	T	SNP	.	556.45	1|1	1|1	.|.	.|.	1|1	.|.	1|1	.|.	0|1	.|.	1|1	1|1	0|0	1|1	.|.	0|0	1|1	.|.	1|1	0,1	0,4	.,.	.,.	0,1	.,.	0,1	.,.	4,2	.,.	0,1	0,2	32,0	0,1	.,.	1,0	0,1	.,.	0,1
Unigene0001777	1343	1343	C	T	SNP	.	842.97	1|1	0|1	1|1	1|1	.|.	.|.	1|1	1|1	0|1	1|1	0|0	.|.	0|0	1|1	.|.	0|0	0|1	0|0	1|1	0,4	5,1	0,2	0,1	.,.	.,.	0,1	0,1	6,7	0,1	1,0	.,.	55,2	0,2	.,.	1,0	8,4	1,0	0,2
Unigene0001777	1568	1568	T	C	SNP	.	346.68	1|1	0|0	1|1	.|.	1|1	.|.	0|0	1|1	0|1	1|1	.|.	1|1	0|0	1|1	.|.	0|0	0|1	0|0	0|0	0,1	4,0	0,1	.,.	0,2	.,.	1,0	0,1	6,2	0,1	.,.	0,1	76,0	0,1	.,.	3,0	5,1	1,0	2,0
Unigene0001777	1904	1904	G	A	SNP	.	1303.05	1|1	1|1	.|.	.|.	1|1	.|.	.|.	.|.	0|1	.|.	.|.	1|1	0|0	1|1	.|.	0|0	1|1	.|.	1|1	0,3	0,7	.,.	.,.	0,4	.,.	.,.	.,.	8,9	.,.	.,.	0,1	69,0	0,1	.,.	2,0	0,5	.,.	0,6
Unigene0001777	2312	2312	A	G	SNP	.	889.3	.|.	1|1	.|.	.|.	1|1	1|1	1|1	.|.	0|1	1|1	1|1	.|.	0|0	1|1	0|0	0|1	1|1	.|.	1|1	.,.	0,7	.,.	.,.	0,1	0,1	0,1	.,.	5,3	0,1	0,1	.,.	48,0	0,1	3,0	7,1	0,5	.,.	0,3
Unigene0001777	2585	2585	A	G	SNP	.	632.53	1|1	0|1	1|1	1|1	.|.	1|1	1|1	1|1	0|1	.|.	.|.	1|1	0|0	1|1	.|.	0|0	0|1	.|.	0|0	0,1	3,5	0,2	0,1	.,.	0,1	0,1	0,1	6,2	.,.	.,.	0,1	68,4	0,2	.,.	5,0	1,2	.,.	1,0
Unigene0001777	3214	3214	A	G	SNP	.	762.52	1|1	1|1	.|.	.|.	1|1	.|.	1|1	1|1	0|0	.|.	1|1	1|1	0|0	.|.	.|.	0|0	1|1	.|.	1|1	0,2	0,6	.,.	.,.	0,1	.,.	0,1	0,2	9,0	.,.	0,1	0,1	57,0	.,.	.,.	3,0	0,4	.,.	0,2
Unigene0001777	3394	3394	C	T	SNP	.	848.58	1|1	1|1	.|.	1|1	.|.	1|1	1|1	1|1	0|1	.|.	1|1	1|1	0|0	.|.	.|.	0|1	.|.	.|.	1|1	0,2	0,7	.,.	0,1	.,.	0,1	0,2	0,3	3,2	.,.	0,2	0,1	59,0	.,.	.,.	2,1	.,.	.,.	0,1
Unigene0001785	2515	2515	A	C	SNP	.	2290.28	.|.	0|1	1|1	0|1	0|1	1|1	0|1	0|0	0|1	1|1	0|1	1|1	1|1	0|1	.|.	0|1	1|1	1|1	1|1	.,.	7,4	0,4	5,6	1,3	0,2	7,9	8,0	1,2	0,5	4,5	0,3	0,3	5,7	.,.	4,1	0,9	0,2	0,1
Unigene0001785	2560	2560	T	A	SNP	.	2794.29	1|1	1|1	1|1	0|1	0|1	.|.	0|1	1|1	1|1	0|0	0|1	0|0	1|1	1|1	.|.	0|0	1|1	.|.	1|1	0,9	0,12	0,3	8,5	5,2	.,.	10,4	0,7	0,2	8,0	8,3	3,0	0,4	0,10	.,.	3,0	0,10	.,.	0,4
Unigene0001794	214	214	T	C	SNP	.	903.27	1|1	0|1	.|.	0|0	0|1	0|0	1|1	1|1	0|1	1|1	1|1	0|1	0|0	0|1	0|0	1|1	1|1	0|0	.|.	0,2	1,6	.,.	10,0	3,4	8,0	0,3	0,2	1,1	0,2	0,1	3,2	7,0	16,2	2,0	0,1	0,2	6,0	.,.
Unigene0001794	517	517	T	C	SNP	.	865.72	1|1	1|1	.|.	0|1	0|1	0|0	1|1	.|.	1|1	.|.	1|1	0|1	0|0	0|1	1|1	.|.	1|1	1|1	.|.	0,1	0,6	.,.	4,2	2,1	7,0	0,3	.,.	0,2	.,.	0,2	1,3	1,0	22,2	0,4	.,.	0,1	0,1	.,.
Unigene0001799	90	90	A	G	SNP	.	293.82	1|1	.|.	.|.	0|0	1|1	0|0	.|.	1|1	0|0	1|1	1|1	1|1	0|1	.|.	.|.	.|.	.|.	.|.	.|.	0,2	.,.	.,.	5,0	0,1	1,0	.,.	0,1	1,0	0,1	0,1	0,1	3,1	.,.	.,.	.,.	.,.	.,.	.,.
Unigene0001799	98	98	C	T	SNP	.	347.5	0|0	.|.	.|.	0|0	1|1	0|0	.|.	1|1	0|0	1|1	1|1	1|1	0|1	0|0	.|.	.|.	1|1	.|.	.|.	2,0	.,.	.,.	6,0	0,2	1,0	.,.	0,1	1,0	0,1	0,3	0,1	3,1	2,0	.,.	.,.	0,1	.,.	.,.
Unigene0001800	77	77	A	G	SNP	.	5632.28	1|1	1|1	0|1	0|1	0|1	0|1	0|1	1|1	1|1	1|1	1|1	0|1	1|1	0|1	1|1	1|1	0|1	0|1	0|1	0,4	0,8	4,3	6,15	13,10	3,8	3,11	0,2	0,7	0,3	0,6	12,7	0,8	7,9	0,6	0,6	7,8	4,7	5,9
Unigene0001800	80	80	C	G	SNP	.	5785.28	1|1	1|1	0|1	0|1	0|1	0|1	0|1	1|1	1|1	1|1	1|1	0|1	1|1	0|1	1|1	1|1	0|1	0|1	0|1	0,4	0,8	4,3	6,15	13,10	3,9	3,11	0,2	0,7	0,3	0,6	12,7	0,8	9,10	0,6	0,6	7,8	4,7	5,9
Unigene0001800	281	281	A	G	SNP	.	1354.04	.|.	.|.	1|1	0|1	1|1	.|.	1|1	.|.	.|.	.|.	0|0	1|1	0|0	0|1	.|.	0|0	1|1	1|1	1|1	.,.	.,.	0,3	1,3	0,5	.,.	0,3	.,.	.,.	.,.	1,0	0,7	2,0	1,4	.,.	1,0	0,4	0,2	0,4
Unigene0001805	1721	1721	A	T	SNP	.	2741	1|1	0|1	0|1	0|1	0|1	1|1	0|1	1|1	0|1	1|1	1|1	1|1	0|0	0|1	1|1	0|1	0|1	0|1	0|1	0,7	1,6	2,1	10,3	1,1	0,3	2,4	0,17	1,6	0,2	0,2	0,2	2,0	2,5	0,1	1,3	1,3	2,1	1,7
Unigene0001805	3094	3094	A	T	SNP	.	1138.72	0|1	1|1	1|1	0|1	1|1	0|1	.|.	0|0	0|1	0|0	0|1	0|0	.|.	0|1	1|1	1|1	1|1	.|.	.|.	1,6	0,2	0,1	2,3	0,2	1,1	.,.	2,0	2,4	2,0	1,2	1,0	.,.	1,2	0,7	0,1	0,2	.,.	.,.
Unigene0001805	3189	3189	C	T	SNP	.	1524.93	0|1	1|1	.|.	0|1	1|1	0|0	1|1	0|0	0|1	0|1	0|1	.|.	1|1	1|1	1|1	.|.	1|1	.|.	1|1	1,8	0,5	.,.	2,8	0,1	1,0	0,1	1,0	1,3	1,1	1,2	.,.	0,1	0,2	0,8	.,.	0,3	.,.	0,1
Unigene0001805	3341	3341	C	T	SNP	.	6321.85	0|1	1|1	0|1	0|1	1|1	1|1	1|1	1|1	1|1	1|1	1|1	1|1	1|1	1|1	0|1	1|1	0|1	1|1	0|1	1,5	1,19	1,2	3,7	0,9	0,5	0,17	0,15	0,7	0,7	0,7	0,2	0,9	0,17	4,1	0,3	1,1	0,4	1,3
Unigene0001809	113	113	C	T	SNP	.	1063.53	0|0	0|1	1|1	1|1	1|1	1|1	0|1	0|1	1|1	1|1	1|1	.|.	0|0	1|1	0|0	0|0	0|1	.|.	1|1	1,0	4,3	0,1	0,2	0,1	0,1	1,4	1,1	0,6	0,1	0,2	.,.	3,0	0,3	1,0	1,0	1,3	.,.	0,4
Unigene0001816	1362	1362	C	T	SNP	.	1477.03	1|1	1|1	.|.	0|1	0|0	1|1	1|1	1|1	1|1	0|1	0|1	1|1	.|.	1|1	1|1	.|.	1|1	1|1	1|1	0,1	0,5	.,.	3,1	1,0	0,3	0,4	0,2	0,3	3,1	3,1	0,1	.,.	0,1	0,2	.,.	0,3	0,2	0,8
Unigene0001817	61	61	A	G	SNP	.	6197.59	0|1	1|1	.|.	0|1	1|1	1|1	0|1	1|1	1|1	1|1	.|.	1|1	1|1	1|1	0|1	0|1	0|1	1|1	0|1	3,13	0,19	.,.	2,19	0,4	0,4	2,1	0,13	0,2	1,19	.,.	0,6	0,3	0,16	2,7	1,5	1,2	0,21	1,6
Unigene0001832	90	90	A	T	SNP	.	5311.25	0|0	1|1	1|1	1|1	0|1	1|1	1|1	1|1	1|1	1|1	0|1	1|1	0|1	1|1	1|1	0|1	1|1	1|1	1|1	11,0	0,12	0,7	0,20	2,4	0,13	0,3	0,9	0,2	0,3	2,13	0,3	1,3	0,21	0,6	1,6	0,7	0,8	0,3
Unigene0001832	135	135	A	G	SNP	.	4285.57	0|1	1|1	0|1	0|1	0|1	1|1	0|1	0|0	0|1	0|1	0|1	1|1	1|1	1|1	1|1	0|1	0|1	1|1	0|1	2,9	0,26	2,4	22,3	1,4	0,16	3,5	12,0	3,2	3,3	14,2	0,5	0,2	0,20	0,5	1,7	9,2	0,10	4,4
Unigene0001832	1248	1248	G	A	SNP	.	5214.92	1|1	0|1	0|1	1|1	0|0	0|1	1|1	1|1	0|1	0|1	1|1	1|1	0|1	1|1	0|1	0|1	0|1	0|1	0|1	0,3	7,16	2,1	0,21	1,0	3,4	0,4	0,1	3,5	2,7	2,16	0,2	9,2	0,11	6,10	1,2	3,7	3,12	4,5
Unigene0001838	88	88	T	-	Deletion	.	1185.86	0|0	0|1	1|1	0|1	.|.	.|.	1|1	0|0	1|1	0|1	0|1	0|1	1|1	.|.	.|.	1|1	1|1	0|0	0|1	1,0	4,4	0,1	2,1	.,.	.,.	0,7	19,0	0,5	4,3	2,1	1,6	0,3	.,.	.,.	0,3	0,3	1,0	1,1
Unigene0001838	531	531	T	C	SNP	.	2788.07	0|0	0|1	0|1	1|1	0|1	0|0	0|1	1|1	0|1	0|1	0|1	1|1	1|1	.|.	1|1	1|1	0|1	1|1	.|.	1,0	10,3	1,3	0,2	2,1	1,0	1,8	0,22	1,4	7,10	3,5	0,3	0,4	.,.	0,4	0,4	1,1	0,2	.,.
Unigene0001838	750	750	C	A	SNP	.	1371.21	.|.	0|0	1|1	1|1	0|1	.|.	1|1	0|1	1|1	0|1	0|0	0|1	1|1	.|.	.|.	1|1	.|.	0|0	.|.	.,.	8,0	0,2	0,2	1,2	.,.	0,4	2,11	0,3	8,7	6,0	2,5	0,1	.,.	.,.	0,3	.,.	1,0	.,.
Unigene0001849	795	795	C	T	SNP	.	12164.6	1|1	0|1	0|1	1|1	1|1	0|1	0|1	0|1	0|1	0|1	1|1	1|1	0|1	0|1	0|1	1|1	1|1	0|1	1|1	0,23	10,36	6,18	1,25	0,11	2,9	5,19	7,16	7,9	6,12	0,8	0,14	2,14	7,26	6,55	0,16	0,27	3,6	0,26
Unigene0001864	804	804	A	G	SNP	.	719.34	0|1	0|0	1|1	0|1	1|1	0|0	1|1	0|1	1|1	0|1	0|0	1|1	.|.	0|1	0|0	0|0	1|1	1|1	0|1	3,1	3,0	0,1	1,1	0,1	1,0	0,1	2,1	0,2	3,2	1,0	0,4	.,.	2,1	1,0	2,0	0,1	0,1	1,1
Unigene0001864	811	811	G	A	SNP	.	907.57	0|1	0|1	1|1	0|1	1|1	0|0	1|1	0|1	1|1	0|1	0|0	1|1	.|.	0|1	0|0	0|0	1|1	1|1	0|1	2,1	2,1	0,1	1,1	0,2	1,0	0,2	2,2	0,3	3,3	1,0	0,4	.,.	1,1	1,0	1,0	0,1	0,1	1,1
Unigene0001864	1098	1098	A	G	SNP	.	17037.1	1|1	1|1	1|1	1|1	0|1	1|1	1|1	0|1	0|1	0|1	0|1	0|1	0|1	0|1	0|1	0|1	0|1	0|1	0|1	0,16	0,37	0,39	0,31	10,11	0,21	0,26	21,28	13,36	48,9	9,32	7,11	9,34	21,42	25,17	5,24	10,31	16,11	12,26
Unigene0001870	379	379	A	G	SNP	.	3659.55	0|1	1|1	0|1	1|1	1|1	1|1	0|1	1|1	0|1	1|1	1|1	0|0	1|1	.|.	.|.	.|.	1|1	1|1	1|1	1,4	1,14	1,4	0,4	0,7	0,13	2,3	0,1	4,18	0,5	0,10	1,0	0,1	.,.	.,.	.,.	0,11	0,7	0,3
Unigene0001870	516	516	A	G	SNP	.	790.53	1|1	0|1	0|1	1|1	0|0	0|0	1|1	.|.	0|0	0|1	.|.	0|1	.|.	1|1	1|1	1|1	0|1	0|1	0|0	0,2	2,2	5,3	0,2	2,0	3,0	0,1	.,.	5,0	2,4	.,.	2,1	.,.	0,1	0,2	0,2	2,1	1,1	5,0
Unigene0001870	691	691	C	G	SNP	.	358.66	1|1	1|1	0|0	0|1	.|.	1|1	1|1	1|1	0|0	.|.	.|.	0|0	.|.	1|1	.|.	.|.	.|.	.|.	.|.	0,2	0,1	1,0	1,3	.,.	0,1	0,1	0,1	1,0	.,.	.,.	1,0	.,.	0,1	.,.	.,.	.,.	.,.	.,.
Unigene0001877	217	217	C	T	SNP	.	12071.6	1|1	0|1	1|1	1|1	1|1	0|1	1|1	0|1	0|1	0|1	0|1	1|1	0|1	0|1	0|0	0|1	0|1	0|1	0|1	0,44	3,22	0,19	2,51	0,14	2,9	0,15	3,16	5,12	5,15	7,3	0,12	4,32	5,12	11,0	8,7	7,10	2,8	8,5
Unigene0001879	116	116	A	G	SNP	.	523.38	0|0	0|0	.|.	1|1	0|0	0|1	0|0	1|1	0|0	0|0	1|1	0|0	0|1	0|0	.|.	0|0	1|1	1|1	1|1	2,0	3,0	.,.	0,1	4,0	2,1	1,0	0,3	5,0	2,0	0,3	2,0	1,1	2,0	.,.	2,0	0,1	0,3	0,3
Unigene0001879	219	219	G	T	SNP	.	926.76	1|1	0|1	0|1	0|0	1|1	1|1	0|1	0|0	1|1	.|.	0|0	1|1	0|0	1|1	.|.	1|1	0|1	1|1	0|1	0,2	1,3	1,1	1,0	0,4	0,5	1,1	3,0	0,2	.,.	3,0	0,2	4,0	0,2	.,.	0,1	1,1	0,2	1,1
Unigene0001881	340	340	T	C	SNP	.	920.59	1|1	1|1	0|0	1|1	1|1	1|1	.|.	0|1	1|1	0|0	.|.	0|1	1|1	1|1	0|1	1|1	1|1	1|1	0|0	0,2	0,1	2,0	0,1	0,1	0,1	.,.	27,3	0,1	3,0	.,.	1,2	0,2	0,1	1,2	0,3	0,1	0,3	1,0
Unigene0001881	614	614	A	C	SNP	.	5187.18	1|1	1|1	1|1	0|1	1|1	0|1	1|1	.|.	0|1	1|1	1|1	1|1	0|1	1|1	0|1	0|1	1|1	0|1	1|1	0,17	0,10	0,10	11,7	0,7	6,3	0,3	.,.	1,7	0,17	0,8	0,10	5,7	0,11	11,4	5,4	0,19	11,1	0,2
Unigene0001888	260	260	T	C	SNP	.	1133.33	1|1	1|1	1|1	0|1	1|1	1|1	0|1	.|.	0|1	.|.	0|1	0|1	0|1	0|1	.|.	1|1	.|.	0|1	0|1	0,2	0,5	0,1	0,1	0,1	0,1	4,3	.,.	2,1	.,.	1,2	2,3	1,1	4,5	.,.	0,1	.,.	1,1	2,1
Unigene0001888	261	261	G	A	SNP	.	1133.33	1|1	1|1	1|1	0|1	1|1	1|1	0|1	.|.	0|1	.|.	0|1	0|1	0|1	0|1	.|.	1|1	.|.	0|1	0|1	0,2	0,5	0,1	1,1	0,1	0,1	4,3	.,.	2,1	.,.	1,2	2,3	1,1	4,5	.,.	0,1	.,.	1,1	2,1
Unigene0001897	324	324	C	T	SNP	.	1313.21	1|1	1|1	.|.	1|1	1|1	0|0	.|.	1|1	.|.	.|.	.|.	.|.	.|.	1|1	.|.	.|.	0|0	.|.	.|.	0,7	0,5	.,.	0,2	0,5	1,0	.,.	0,11	.,.	.,.	.,.	.,.	.,.	0,3	.,.	.,.	1,0	.,.	.,.
Unigene0001908	251	251	G	T	SNP	.	1324.14	1|1	0|1	0|1	0|1	0|0	1|1	0|1	1|1	1|1	0|0	1|1	0|1	1|1	0|0	.|.	0|1	0|1	1|1	0|1	0,2	2,6	2,1	4,2	3,0	0,2	2,6	0,2	0,3	2,0	0,1	2,3	0,1	1,0	.,.	2,2	3,5	0,1	2,8
Unigene0001908	336	336	C	T	SNP	.	1358.43	1|1	0|1	0|1	1|1	1|1	0|0	1|1	0|1	0|0	0|1	0|1	0|1	1|1	0|0	.|.	1|1	0|1	1|1	0|1	0,1	5,1	2,1	0,1	0,2	1,0	0,11	1,2	2,0	1,1	1,2	1,1	0,2	3,0	.,.	0,4	2,3	0,1	1,5
Unigene0001926	495	495	A	T	SNP	.	2903.04	0|0	1|1	1|1	1|1	1|1	0|1	1|1	0|1	0|1	1|1	1|1	1|1	1|1	1|1	.|.	1|1	0|0	1|1	1|1	8,0	0,9	0,4	0,1	0,5	2,1	0,3	22,6	1,3	0,6	.	0,3	0,2	0,2	.,.	0,1	1,0	0,5	0,5
Unigene0001926	500	500	A	G	SNP	.	3180.39	0|0	1|1	1|1	1|1	1|1	0|1	1|1	0|1	0|1	1|1	1|1	1|1	1|1	1|1	1|1	1|1	0|0	1|1	1|1	10,0	0,11	0,4	0,1	0,8	3,1	0,4	23,7	1,10	0,6	0,2	0,2	0,2	0,3	0,1	0,1	1,0	0,5	0,10
Unigene0001939	1693	1693	A	G	SNP	.	401.22	.|.	1|1	.|.	1|1	1|1	1|1	0|0	1|1	0|1	1|1	.|.	.|.	0|0	1|1	0|1	.|.	.|.	.|.	0|0	.,.	0,2	.,.	0,2	0,1	0,1	1,0	0,1	1,1	0,2	.,.	.,.	2,0	0,1	2,1	.,.	.,.	.,.	1,0
Unigene0001940	626	626	A	G	SNP	.	30148.1	0|1	1|1	0|1	0|1	0|1	0|1	0|1	0|1	0|1	0|1	0|1	0|1	1|1	1|1	0|1	1|1	1|1	0|1	1|1	27,63	1,88	17,27	16,86	15,28	7,35	8,61	34,16	17,24	29,63	7,45	11,25	0,35	0,66	12,49	0,47	0,42	7,16	0,39
Unigene0001952	152	152	T	A	SNP	.	6693.15	1|1	0|1	1|1	1|1	0|1	1|1	1|1	0|1	1|1	0|0	0|1	0|1	1|1	0|0	1|1	1|1	1|1	1|1	1|1	0,24	59,26	.	.	9,2	0,5	0,17	1,11	0,11	30,1	14,5	7,9	0,1	31,0	0,7	0,14	0,6	0,3	0,9
Unigene0001952	270	270	A	C	SNP	.	16818.6	1|1	0|1	1|1	0|1	0|1	1|1	0|1	1|1	0|1	0|1	1|1	0|1	0|1	0|1	0|1	0|1	1|1	1|1	1|1	0,52	40,36	0,11	47,10	9,13	0,22	45,20	0,49	15,15	47,35	0,18	9,10	14,7	11,44	15,10	37,17	0,15	0,17	0,18
Unigene0001952	898	898	-	C	Insertion	.	8233.79	1|1	0|1	1|1	0|1	1|1	0|1	1|1	1|1	0|1	0|1	0|1	1|1	1|1	1|1	0|1	0|1	0|0	1|1	0|1	0,23	56,13	1,15	38,14	0,4	23,16	0,28	0,13	9,13	13,26	37,12	0,17	1,13	0,29	44,12	14,8	35,3	0,6	19,3
Unigene0001952	1047	1047	T	-	Deletion	.	2239.02	1|1	0|1	1|1	0|1	.|.	0|1	1|1	1|1	0|0	0|1	0|1	1|1	0|1	1|1	0|1	0|1	0|1	0|1	0|1	0,8	12,5	0,5	26,7	.,.	9,11	0,4	0,6	4,0	3,3	7,3	0,4	3,2	0,2	13,7	5,6	6,3	3,3	9,1
Unigene0001957	242	242	A	C	SNP	.	2328.09	1|1	1|1	0|1	0|0	1|1	1|1	1|1	1|1	1|1	1|1	0|1	1|1	.|.	1|1	.|.	1|1	0|1	1|1	0|1	0,2	0,2	1,2	42,0	0,1	0,7	0,1	0,0	0,11	0,5	0,6	0,1	.,.	0,15	.,.	0,3	30,3	0,1	21,2
Unigene0001963	902	902	A	T	SNP	.	1090.65	0|1	0|1	0|1	0|1	1|1	0|0	1|1	0|1	0|1	0|1	0|0	0|1	0|1	0|1	1|1	1|1	1|1	1|1	0|0	3,1	3,5	1,2	2,1	0,1	2,0	0,2	2,3	10,1	1,2	4,0	1,2	1,1	2,5	0,2	0,2	0,4	0,1	1,0
Unigene0001966	248	248	C	T	SNP	.	741.45	0|0	0|0	0|1	0|0	0|0	0|1	.|.	1|1	0|0	0|0	0|1	0|0	1|1	1|1	1|1	1|1	1|1	.|.	0|0	9,0	1,0	1,1	2,0	2,0	7,2	.,.	0,1	1,0	2,0	3,4	3,0	0,3	0,5	0,1	0,1	0,2	.,.	2,0
Unigene0001966	252	252	C	T	SNP	.	677.45	0|0	0|0	0|1	0|0	0|0	0|1	.|.	1|1	0|0	0|0	0|1	0|0	1|1	1|1	1|1	1|1	1|1	.|.	0|0	8,0	1,0	1,1	2,0	2,0	6,2	.,.	0,1	1,0	2,0	3,4	2,0	0,2	0,4	0,1	0,1	0,2	.,.	2,0
Unigene0001966	473	473	G	A	SNP	.	1560.47	0|0	0|1	1|1	1|1	0|1	0|1	0|1	0|1	1|1	.|.	0|1	0|0	1|1	0|1	0|1	1|1	0|1	1|1	1|1	9,0	4,5	0,3	0,3	1,2	4,2	5,3	2,3	0,9	.,.	1,4	2,0	0,2	1,8	2,1	0,1	3,5	0,2	0,1
Unigene0001966	1107	1107	C	-	Deletion	.	866.33	1|1	1|1	0|1	0|1	.|.	1|1	1|1	0|0	0|1	0|1	1|1	.|.	1|1	0|0	0|0	0|0	0|0	0|1	0|0	0,3	0,3	7,3	2,7	.,.	0,2	0,1	1,0	3,1	1,1	0,2	.,.	0,2	1,0	2,0	1,0	13,0	3,1	14,0
Unigene0001969	484	484	G	C	SNP	.	4236.88	1|1	1|1	1|1	0|1	0|1	1|1	1|1	1|1	1|1	1|1	0|1	0|1	0|1	0|1	1|1	1|1	1|1	0|1	1|1	0,6	0,9	0,3	10,6	20,8	0,3	0,7	0,25	0,13	0,1	4,2	10,2	17,6	11,10	0,3	0,1	0,1	1,1	0,7
Unigene0001969	581	581	C	T	SNP	.	6578.53	1|1	1|1	1|1	0|1	0|0	0|1	0|1	1|1	0|1	.|.	0|1	0|0	0|1	0|1	0|1	1|1	0|0	0|1	1|1	0,15	0,20	0,3	8,10	30,3	3,4	3,7	2,42	9,29	.,.	7,2	18,2	15,5	12,16	4,4	0,1	1,0	4,4	1,22
Unigene0001969	647	647	C	T	SNP	.	601.05	0|0	.|.	.|.	1|1	1|1	.|.	0|1	0|0	0|1	.|.	1|1	1|1	1|1	0|1	1|1	.|.	.|.	.|.	.|.	1,0	.,.	.,.	0,1	0,7	.,.	0,0	38,0	1,1	.,.	0,1	0,1	0,2	1,1	0,2	.,.	.,.	.,.	.,.
Unigene0001972	230	230	A	G	SNP	.	2184.96	1|1	0|1	0|1	1|1	0|1	0|0	1|1	1|1	1|1	1|1	0|1	0|1	0|0	0|1	0|1	.|.	0|1	1|1	0|1	0,4	5,3	4,3	0,5	1,1	2,0	0,3	0,5	0,3	0,8	1,2	7,5	1,0	3,1	1,2	.,.	2,4	0,1	12,7
Unigene0001972	600	600	G	T	SNP	.	10939.8	1|1	1|1	1|1	1|1	1|1	1|1	0|1	1|1	0|1	1|1	1|1	0|1	0|1	1|1	1|1	0|1	0|1	0|1	0|1	0,10	0,22	0,14	0,17	1,15	0,8	3,17	0,38	1,7	0,8	0,7	2,17	2,3	1,16	0,3	3,12	3,17	1,3	17,64
Unigene0001982	205	205	A	G	SNP	.	614.08	1|1	1|1	1|1	1|1	1|1	.|.	1|1	1|1	0|1	0|0	1|1	.|.	1|1	.|.	1|1	.|.	.|.	1|1	0|0	0,1	0,1	0,2	0,1	0,1	.,.	0,2	0,1	2,3	5,0	0,1	.,.	0,1	.,.	0,2	.,.	.,.	0,1	1,0
Unigene0001982	218	218	A	G	SNP	.	426.81	.|.	1|1	1|1	1|1	1|1	.|.	.|.	1|1	0|1	0|0	.|.	.|.	1|1	.|.	1|1	.|.	.|.	1|1	0|0	.,.	0,1	0,2	0,1	0,1	.,.	.,.	0,1	2,3	5,0	.,.	.,.	0,1	.,.	0,1	.,.	.,.	0,1	1,0
Unigene0001982	238	238	C	T	SNP	.	454.81	.|.	1|1	.|.	1|1	.|.	1|1	1|1	.|.	0|1	0|1	.|.	.|.	1|1	1|1	1|1	.|.	1|1	.|.	0|0	.,.	0,3	.,.	0,1	.,.	0,1	0,1	.,.	2,1	5,1	.,.	.,.	0,2	0,2	0,1	.,.	0,1	.,.	1,0
Unigene0001983	1028	1028	C	G	SNP	.	2601.28	0|1	0|1	1|1	0|1	1|1	0|0	1|1	0|1	0|1	0|1	1|1	0|1	1|1	1|1	0|1	0|1	0|0	0|1	0|1	2,2	1,3	0,8	2,3	0,4	1,0	0,11	5,1	2,3	3,3	0,5	2,4	0,2	0,14	1,2	1,3	4,0	1,2	1,1
Unigene0001987	155	155	C	A	SNP	.	2048.15	1|1	0|1	0|1	0|1	1|1	1|1	0|1	1|1	1|1	1|1	1|1	.|.	1|1	1|1	1|1	0|0	1|1	1|1	1|1	0,6	11,2	3,4	10,1	0,1	0,3	6,1	0,4	0,5	0,1	0,3	.,.	0,7	0,2	0,2	3,0	0,5	0,5	0,2
Unigene0001998	72	72	A	G	SNP	.	709.9	1|1	0|1	0|1	1|1	.|.	0|1	.|.	.|.	1|1	0|0	1|1	.|.	0|0	0|1	0|1	1|1	1|1	0|0	0|0	0,1	1,2	1,1	0,2	.,.	3,1	.,.	.,.	0,2	2,0	0,1	.,.	2,0	3,1	1,1	0,1	0,6	2,0	1,0
Unigene0001998	117	117	A	T	SNP	.	1166.9	1|1	0|1	0|1	0|0	.|.	0|1	.|.	1|1	0|1	1|1	0|0	0|0	1|1	0|1	1|1	1|1	0|0	1|1	1|1	0,2	3,3	1,2	2,0	.,.	1,3	.,.	0,1	2,1	0,2	1,0	1,0	0,3	2,6	0,2	0,1	9,0	0,3	0,3
Unigene0001999	266	266	C	T	SNP	.	1757.14	0|1	0|1	0|1	1|1	0|1	.|.	1|1	0|1	0|1	1|1	1|1	1|1	.|.	0|1	0|0	1|1	1|1	1|1	1|1	2,11	5,2	1,1	0,4	1,4	.,.	0,1	6,2	5,2	0,4	0,3	0,1	.,.	2,3	2,0	0,1	0,4	0,1	0,6
Unigene0002008	418	418	G	T	SNP	.	5424.05	1|1	0|1	0|1	0|1	1|1	0|1	1|1	0|1	0|1	0|1	0|1	1|1	1|1	1|1	0|1	0|1	0|1	1|1	0|1	0,1	10,20	7,13	5,12	0,12	7,3	0,9	3,3	27,3	4,3	1,12	0,6	0,4	0,15	4,4	5,5	4,6	0,2	5,10
Unigene0002008	2270	2270	C	T	SNP	.	405.41	1|1	1|1	0|1	1|1	0|0	0|1	0|0	.|.	1|1	0|0	1|1	1|1	.|.	0|0	0|1	.|.	0|0	0|0	0|1	0,1	0,2	1,1	0,2	1,0	2,1	2,0	.,.	0,1	2,0	0,1	0,1	.,.	1,0	2,1	.,.	1,0	1,0	1,1
Unigene0002018	232	232	G	A	SNP	.	5054.24	1|1	0|1	0|1	1|1	0|1	1|1	0|0	0|1	1|1	1|1	1|1	0|1	1|1	1|1	1|1	.|.	.|.	.|.	1|1	0,4	6,8	1,11	0,2	16,19	0,2	4,0	9,15	0,41	0,3	0,17	5,6	0,1	0,2	0,4	.,.	.,.	.,.	0,5
Unigene0002023	3219	3219	G	C	SNP	.	1618.03	0|1	0|1	0|1	0|1	0|1	1|1	0|1	1|1	.|.	0|0	0|0	0|0	1|1	0|1	.|.	0|0	1|1	1|1	1|1	0,3	11,2	2,0	13,2	10,2	.	30,1	0,9	.,.	21,1	21,1	11,0	0,2	62,18	.,.	21,0	0,2	.	.
Unigene0002037	413	413	T	C	SNP	.	10282	1|1	1|1	0|1	1|1	0|1	0|1	0|1	1|1	0|1	0|1	0|1	0|1	0|1	0|1	0|1	1|1	1|1	0|1	1|1	0,5	7,60	2,4	1,25	2,6	4,8	9,10	0,12	2,10	8,17	4,10	1,4	2,8	11,15	6,19	0,12	0,12	3,6	0,17
Unigene0002040	116	116	T	C	SNP	.	4375.32	1|1	0|1	1|1	1|1	1|1	1|1	1|1	0|1	0|1	0|1	1|1	1|1	0|1	1|1	.|.	1|1	0|1	0|0	0|1	0,12	4,9	0,8	0,8	0,8	0,8	0,10	2,2	11,7	3,3	0,8	0,9	2,3	0,12	.,.	0,4	11,8	4,0	5,6
Unigene0002074	778	778	C	G	SNP	.	1419.63	1|1	0|1	0|1	.|.	1|1	.|.	1|1	0|1	.|.	.|.	1|1	.|.	.|.	.|.	0|1	.|.	0|0	1|1	1|1	0,1	2,5	1,2	.,.	0,1	.,.	0,11	2,2	.,.	.,.	0,1	.,.	.,.	.,.	1,9	.,.	1,0	0,1	0,2
Unigene0002075	501	501	G	T	SNP	.	630.05	.|.	0|0	.|.	0|1	1|1	0|0	0|1	1|1	1|1	.|.	.|.	0|0	.|.	1|1	.|.	.|.	1|1	1|1	0|1	.,.	1,0	.,.	1,2	0,1	1,0	5,2	0,2	0,1	.,.	.,.	4,0	.,.	0,2	.,.	.,.	0,1	0,1	6,4
Unigene0002075	510	510	C	T	SNP	.	599.05	.|.	0|0	.|.	0|1	1|1	0|0	0|1	1|1	1|1	.|.	.|.	0|0	.|.	1|1	.|.	.|.	1|1	1|1	0|1	.,.	1,0	.,.	1,2	0,1	1,0	4,2	0,2	0,1	.,.	.,.	4,0	.,.	0,2	.,.	.,.	0,1	0,1	7,4
Unigene0002080	1120	1120	A	G	SNP	.	4210.79	1|1	0|1	1|1	0|1	0|1	1|1	0|1	1|1	0|0	0|1	0|0	0|1	0|1	1|1	0|1	0|1	.|.	0|1	1|1	0,10	32,5	0,1	29,11	12,2	0,9	26,5	0,13	1,0	8,19	15,0	6,1	5,4	0,19	1,2	14,4	.,.	1,9	0,2
Unigene0002080	1206	1206	A	C	SNP	.	9936.53	1|1	0|1	1|1	0|1	0|1	1|1	0|1	1|1	1|1	0|1	0|1	0|1	0|1	1|1	1|1	0|1	1|1	0|1	1|1	0,17	37,28	0,2	32,32	13,4	0,19	22,21	0,13	2,16	7,14	15,2	6,3	7,7	0,36	0,5	15,10	0,8	2,13	0,16
Unigene0002081	369	369	A	T	SNP	.	3290.09	1|1	1|1	0|1	0|1	0|1	1|1	0|0	0|1	0|1	1|1	0|1	0|1	0|1	0|1	1|1	0|1	0|1	1|1	1|1	0,9	0,16	5,1	16,5	2,3	0,4	11,0	1,2	6,7	0,5	5,13	3,1	9,6	7,3	0,4	4,2	1,5	0,5	0,2
Unigene0002083	308	308	T	A	SNP	.	3465.9	1|1	0|0	0|1	0|0	1|1	0|1	0|1	1|1	0|1	.|.	1|1	1|1	1|1	0|1	0|1	0|1	0|1	.|.	0|1	0,10	11,0	2,16	2,0	0,3	2,6	5,6	0,9	4,1	.,.	0,11	0,5	0,3	5,8	3,5	4,4	1,2	.,.	1,3
Unigene0002083	550	550	G	C	SNP	.	1343.16	1|1	0|0	0|1	0|0	1|1	.|.	0|1	.|.	0|1	.|.	1|1	1|1	1|1	0|1	0|1	0|1	0|1	1|1	1|1	0,1	30,0	7,3	22,0	0,2	.,.	19,2	.,.	30,3	.,.	0,1	0,6	0,6	13,6	26,4	13,3	5,2	0,2	0,2
Unigene0002089	391	391	C	T	SNP	.	4124.3	0|1	0|1	0|1	0|1	1|1	0|1	1|1	0|0	0|1	0|0	0|1	1|1	0|1	0|1	0|1	0|1	1|1	1|1	1|1	8,6	6,2	9,10	7,14	0,10	7,3	0,8	10,0	10,5	10,0	13,3	0,5	6,3	17,2	8,13	3,10	0,7	0,5	0,2
Unigene0002089	1227	1227	C	T	SNP	.	31783.1	1|1	0|1	0|1	0|1	0|1	1|1	1|1	1|1	0|1	1|1	0|1	0|1	1|1	0|1	0|1	0|1	1|1	1|1	1|1	0,64	5,64	3,26	4,37	5,29	0,18	1,54	0,59	7,73	1,55	4,19	2,17	3,52	16,44	7,22	6,8	0,56	0,27	0,37
Unigene0002089	1332	1332	G	T	SNP	.	29877.5	0|1	0|1	1|1	0|1	1|1	0|1	1|1	1|1	0|1	1|1	1|1	1|1	0|1	1|1	1|1	1|1	0|1	1|1	0|1	33,22	31,59	0,45	18,50	0,34	10,37	0,45	0,66	26,58	2,40	0,33	0,22	13,26	0,58	0,25	0,22	20,75	0,26	13,50
Unigene0002090	504	504	G	T	SNP	.	827.48	.|.	1|1	0|0	.|.	0|0	1|1	.|.	.|.	1|1	.|.	.|.	.|.	1|1	1|1	1|1	.|.	.|.	.|.	.|.	.,.	0,4	3,0	.,.	3,0	0,1	.,.	.,.	0,1	.,.	.,.	.,.	0,1	0,9	0,5	.,.	.,.	.,.	.,.
Unigene0002090	557	557	A	G	SNP	.	1755.19	.|.	0|0	1|1	1|1	1|1	.|.	1|1	.|.	0|1	.|.	.|.	1|1	0|1	0|1	0|1	1|1	.|.	.|.	.|.	.,.	7,0	0,12	0,3	0,5	.,.	0,3	.,.	4,6	.,.	.,.	0,1	1,1	7,8	11,6	0,1	.,.	.,.	.,.
Unigene0002099	75	75	T	C	SNP	.	1244.79	1|1	1|1	0|0	1|1	1|1	.|.	0|1	1|1	0|1	1|1	0|1	.|.	0|1	.|.	.|.	0|1	0|0	0|0	.|.	0,2	0,4	21,2	0,1	0,11	.,.	4,2	0,7	3,2	0,1	11,2	.,.	13,3	.,.	.,.	4,1	1,0	1,0	.,.
Unigene0002099	692	692	C	T	SNP	.	4809.48	0|0	1|1	0|1	0|1	0|1	1|1	1|1	0|0	0|1	1|1	1|1	0|1	1|1	0|1	1|1	1|1	1|1	1|1	.|.	6,0	0,3	12,37	1,1	18,9	0,2	0,12	13,0	8,5	0,3	0,1	14,10	0,17	4,7	0,2	0,3	0,2	0,2	.,.
Unigene0002099	694	694	T	C	SNP	.	4809.48	0|0	1|1	0|1	0|1	0|1	1|1	1|1	0|0	0|1	1|1	1|1	0|1	1|1	0|1	1|1	1|1	1|1	1|1	.|.	6,0	0,3	12,37	1,1	17,9	0,2	0,13	13,0	8,5	0,3	0,2	14,10	0,16	4,7	0,2	0,3	0,2	0,2	.,.
Unigene0002104	209	209	T	C	SNP	.	999	0|0	0|1	0|0	0|1	1|1	1|1	0|0	0|1	1|1	0|1	0|1	1|1	1|1	0|0	0|1	0|1	0|1	1|1	0|1	1,0	17,6	3,0	12,5	0,1	0,2	1,0	4,1	0,3	5,1	4,2	0,2	0,1	6,0	2,2	6,2	8,2	0,4	13,3
Unigene0002104	233	233	T	C	SNP	.	2613.8	0|0	1|1	0|0	1|1	1|1	1|1	0|0	1|1	1|1	0|1	0|1	1|1	1|1	0|0	1|1	0|1	0|1	1|1	0|1	1,0	0,18	2,0	0,16	0,2	0,1	1,0	0,2	0,4	2,1	2,4	0,3	0,3	4,1	0,3	3,2	6,3	0,4	9,4
Unigene0002106	160	160	C	T	SNP	.	3398.98	1|1	1|1	1|1	0|1	1|1	1|1	0|1	1|1	0|1	0|1	0|1	0|1	0|1	1|1	0|1	1|1	0|1	1|1	0|1	0,5	0,11	0,3	7,8	0,4	0,1	1,8	0,6	1,8	2,5	3,2	1,6	5,7	0,9	2,6	0,2	1,2	0,2	1,1
Unigene0002106	219	219	A	G	SNP	.	10872.8	1|1	1|1	1|1	0|1	1|1	1|1	1|1	1|1	1|1	0|1	0|1	1|1	0|1	1|1	1|1	1|1	0|1	0|1	0|1	0,16	1,28	0,11	3,28	0,13	0,8	1,19	0,13	0,17	2,14	4,9	1,18	4,17	0,24	1,18	0,13	1,12	2,5	1,4
Unigene0002109	1129	1129	T	C	SNP	.	4100.79	0|1	1|1	0|1	1|1	1|1	1|1	0|1	0|1	0|1	0|1	0|1	0|1	0|1	0|1	0|1	0|1	1|1	1|1	1|1	1,7	0,8	3,2	0,16	0,4	0,6	2,6	1,6	1,8	8,2	9,4	1,5	1,3	8,6	2,7	5,4	0,6	0,2	0,12
Unigene0002113	1988	1988	T	C	SNP	.	8910.82	1|1	0|1	1|1	1|1	0|1	0|1	1|1	1|1	0|1	0|1	1|1	0|1	0|1	0|1	0|1	0|1	1|1	0|1	1|1	0,5	25,18	0,15	0,19	8,10	4,14	0,26	0,12	10,29	8,5	0,6	2,10	9,4	14,22	1,6	3,3	0,14	7,8	0,19
Unigene0002114	250	250	G	T	SNP	.	3534.12	1|1	0|1	0|0	0|1	1|1	0|1	1|1	1|1	0|1	0|1	0|1	1|1	0|0	1|1	0|1	0|1	1|1	0|1	1|1	0,5	2,15	3,0	4,6	0,5	8,1	0,12	0,2	14,2	1,2	4,6	0,2	9,0	0,20	3,1	6,4	0,7	1,1	0,4
Unigene0002115	833	833	C	G	SNP	.	2513.2	0|1	0|1	0|1	0|1	0|0	1|1	0|1	1|1	1|1	1|1	0|1	0|1	0|1	0|1	1|1	0|1	0|1	1|1	0|1	2,4	8,7	3,4	1,3	1,0	0,4	5,6	0,4	0,8	0,2	3,1	17,8	2,4	4,2	0,4	4,3	3,4	0,1	1,3
Unigene0002115	1464	1464	C	T	SNP	.	3233.01	1|1	1|1	1|1	0|1	0|1	1|1	0|1	1|1	1|1	1|1	1|1	0|1	1|1	0|1	1|1	1|1	0|1	.|.	0|1	0,5	0,4	0,6	4,5	4,1	0,6	4,7	0,16	0,12	0,1	0,1	4,10	0,5	7,5	0,4	0,1	3,5	.,.	5,1
Unigene0002115	2482	2482	T	C	SNP	.	3123.25	0|1	0|1	1|1	0|1	0|1	0|1	0|1	0|1	1|1	1|1	1|1	0|1	1|1	1|1	1|1	1|1	1|1	1|1	0|1	4,7	6,3	0,2	4,2	2,2	1,1	3,2	1,12	0,14	0,6	0,3	3,5	0,8	0,5	0,1	0,3	0,6	0,1	1,8
Unigene0002115	2949	2949	T	C	SNP	.	3586.84	1|1	0|1	1|1	0|1	0|1	0|1	0|1	0|1	1|1	1|1	0|1	0|1	1|1	1|1	0|1	0|1	0|1	.|.	0|1	0,9	6,6	0,4	1,5	2,2	1,4	1,6	7,9	0,11	0,1	2,2	9,9	0,14	0,5	4,4	3,2	3,7	.,.	1,3
Unigene0002115	3490	3490	A	G	SNP	.	7445.81	1|1	0|1	1|1	1|1	0|1	1|1	1|1	1|1	1|1	1|1	0|1	0|1	1|1	0|1	0|1	1|1	1|1	1|1	1|1	0,12	11,23	0,12	1,10	6,11	0,2	0,13	0,16	0,10	0,9	1,7	3,15	0,16	1,10	5,15	0,3	0,3	0,1	0,13
Unigene0002125	909	909	A	G	SNP	.	791	0|1	1|1	1|1	0|0	0|1	1|1	0|1	1|1	0|1	.|.	.|.	0|1	0|1	0|1	.|.	0|1	0|0	1|1	1|1	1,1	0,3	0,1	2,0	5,2	0,2	2,1	0,1	2,1	.,.	.,.	1,1	2,4	3,1	.,.	1,1	2,0	0,1	0,1
Unigene0002125	925	925	A	C	SNP	.	1212.69	0|1	1|1	1|1	0|1	0|1	1|1	0|1	1|1	0|1	1|1	.|.	1|1	0|1	0|1	.|.	1|1	0|0	1|1	1|1	1,2	0,5	0,1	1,1	3,3	0,2	2,2	0,1	2,2	0,1	.,.	0,1	1,5	2,2	.,.	0,1	1,0	0,1	0,1
Unigene0002136	192	192	A	G	SNP	.	1380.82	1|1	0|1	1|1	0|1	0|1	0|1	1|1	1|1	1|1	1|1	0|1	0|1	1|1	1|1	1|1	1|1	1|1	1|1	0|1	0,5	4,4	0,1	2,1	1,1	1,1	0,1	0,2	0,1	0,2	1,3	1,1	0,1	0,2	0,3	0,2	0,2	0,2	1,4
Unigene0002136	590	590	T	C	SNP	.	960.34	0|1	0|1	0|1	1|1	1|1	0|1	0|0	1|1	0|0	.|.	0|1	1|1	1|1	0|1	0|0	1|1	0|1	1|1	0|1	1,3	2,2	3,1	0,1	0,3	2,2	3,0	0,1	6,0	.,.	2,1	0,2	0,3	4,2	1,0	0,2	2,1	0,1	1,1
Unigene0002142	84	84	G	C	SNP	.	5142.28	0|0	1|1	.|.	.|.	.|.	.|.	1|1	0|1	1|1	0|0	1|1	.|.	1|1	.|.	0|1	.|.	0|0	1|1	1|1	360,0	0,28	.,.	.,.	.,.	.,.	0,1	223111	0,3	1,0	0,3	.,.	0,1	.,.	2,1	.,.	1,0	0,2	0,1
Unigene0002142	417	417	C	G	SNP	.	17167.2	0|1	1|1	1|1	1|1	0|1	1|1	1|1	0|1	0|1	1|1	1|1	0|1	0|0	1|1	1|1	1|1	1|1	0|0	1|1	258,23	0,20	0,28	0,34	34,4	0,33	0,43	92,34	5,21	0,60	0,9	43,4	15,0	1,69	0,22	0,7	0,21	29,2	0,24
Unigene0002146	538	538	G	T	SNP	.	2228.38	1|1	0|1	0|1	0|1	1|1	1|1	0|1	1|1	1|1	1|1	0|1	1|1	1|1	0|1	1|1	0|0	0|1	1|1	0|1	0,4	4,1	2,2	1,3	0,2	0,2	4,1	0,5	0,2	0,6	1,3	0,4	0,4	4,7	0,3	1,0	1,3	0,1	3,8
Unigene0002149	187	187	A	G	SNP	.	1176.94	1|1	0|1	0|0	1|1	.|.	1|1	0|0	0|0	0|0	1|1	0|1	0|1	1|1	0|1	0|1	.|.	0|1	1|1	.|.	0,1	1,6	1,0	0,1	.,.	0,4	2,0	1,0	3,0	0,1	1,3	1,1	0,1	7,8	2,4	.,.	1,3	0,1	.,.
Unigene0002160	784	784	T	C	SNP	.	2502.74	0|0	1|1	1|1	.|.	1|1	0|1	1|1	0|1	0|1	0|1	0|1	1|1	0|1	1|1	1|1	1|1	0|1	0|1	0|1	13,0	0,5	0,2	.,.	0,7	1,5	0,6	8,2	1,4	4,1	1,1	0,5	1,6	0,5	0,1	0,1	2,3	1,2	4,9
Unigene0002161	180	180	G	T	SNP	.	3340.02	1|1	1|1	1|1	0|1	1|1	1|1	0|1	1|1	0|1	0|1	0|1	0|1	1|1	1|1	0|1	0|0	0|1	0|0	0|1	0,9	0,7	0,8	4,9	0,5	0,4	7,5	0,5	6,1	3,3	2,1	1,3	0,7	0,5	2,1	7,0	9,9	2,0	2,7
Unigene0002174	440	440	A	G	SNP	.	1780.54	0|1	0|1	0|0	0|1	0|1	0|1	0|1	1|1	1|1	1|1	0|0	0|1	0|1	0|0	0|1	1|1	1|1	1|1	1|1	8,2	4,4	2,0	3,5	5,2	3,5	5,2	0,1	0,4	0,2	10,0	1,2	1,5	11,0	4,7	0,1	0,1	0,2	0,2
Unigene0002174	464	464	A	G	SNP	.	1964.23	0|0	0|1	0|1	0|1	0|1	0|1	0|1	1|1	1|1	1|1	0|0	0|1	0|1	0|1	0|1	.|.	1|1	1|1	1|1	10,0	7,1	2,3	3,7	3,2	3,4	6,5	0,1	0,4	0,3	9,0	1,2	2,5	14,2	5,9	.,.	0,2	0,2	0,2
Unigene0002174	1266	1266	A	G	SNP	.	18263.1	0|1	1|1	1|1	0|1	0|1	1|1	0|1	0|1	1|1	0|1	0|1	0|1	1|1	0|1	0|1	0|1	0|1	1|1	0|1	9,28	0,68	1,38	18,42	8,32	0,22	13,22	21,3	0,37	6,18	13,27	5,26	0,29	12,56	1,5	10,16	10,20	0,12	10,6
Unigene0002175	311	311	G	A	SNP	.	24034.3	0|1	0|1	1|1	1|1	0|1	0|1	0|1	0|0	1|1	1|1	0|1	0|1	1|1	1|1	1|1	0|1	0|1	1|1	0|1	15,2	24,62	0,26	0,52	3,26	7,19	14,56	19,1	0,82	0,17	7,45	2,20	0,25	0,88	0,11	6,30	17,57	0,14	10,15
Unigene0002175	393	393	T	G	SNP	.	22458.7	1|1	0|1	1|1	1|1	0|1	0|1	0|1	1|1	1|1	0|1	0|1	0|1	1|1	1|1	1|1	0|1	0|1	1|1	0|1	0,9	22,54	0,23	0,45	3,23	6,14	11,39	0,6	0,69	7,18	5,31	5,24	0,27	0,76	0,17	8,20	22,63	1,8	8,26
Unigene0002175	1319	1319	A	G	SNP	.	7917.64	0|1	0|1	1|1	1|1	0|1	0|1	0|1	0|1	0|1	1|1	1|1	0|1	0|1	1|1	0|1	0|1	0|1	1|1	0|1	9,5	5,12	0,16	0,18	5,6	1,9	5,7	4,4	1,11	0,13	1,14	3,4	3,6	0,24	5,17	2,8	8,12	0,4	1,8
Unigene0002179	178	178	C	T	SNP	.	3550.96	1|1	0|1	0|1	0|1	1|1	1|1	1|1	1|1	1|1	1|1	1|1	0|1	1|1	0|1	0|1	1|1	1|1	1|1	1|1	0,11	1,3	1,3	2,9	0,1	0,3	0,2	0,3	0,12	0,5	0,1	1,3	0,2	1,14	5,4	0,4	0,4	0,1	0,3
Unigene0002179	216	216	C	T	SNP	.	4034.45	1|1	0|1	0|1	0|1	1|1	1|1	0|1	1|1	1|1	0|1	0|1	0|1	0|1	0|1	0|1	0|1	1|1	1|1	1|1	0,9	5,9	1,4	5,9	0,3	0,5	3,2	0,4	0,11	3,8	1,2	3,4	1,2	2,11	5,11	2,5	0,5	0,1	0,4
Unigene0002183	197	197	A	T	SNP	.	32855.6	1|1	1|1	1|1	0|1	1|1	1|1	1|1	1|1	0|1	0|1	1|1	1|1	0|1	1|1	1|1	0|1	0|1	1|1	0|1	0,50	3,98	0,35	17,75	1,36	0,18	0,48	1,42	13,13	6,58	4,64	1,53	10,34	1,77	4106	4,31	6,31	1,14	6,23
Unigene0002185	517	517	A	G	SNP	.	1854.64	0|0	.|.	1|1	1|1	1|1	1|1	.|.	.|.	0|1	.|.	1|1	1|1	1|1	0|1	0|1	1|1	0|1	1|1	.|.	3,0	.,.	0,1	0,4	0,1	0,6	.,.	.,.	1,3	.,.	0,7	0,1	0,4	2,17	1,1	0,2	1,6	0,1	.,.
Unigene0002190	187	187	C	G	SNP	.	66824.1	1|1	0|1	0|1	0|1	0|1	1|1	0|1	1|1	1|1	1|1	1|1	0|1	0|1	1|1	0|1	0|1	0|1	0|1	0|1	0,178	93153	5,36	87125	21,27	0,108	51,84	0,66	7143	0,135	0,134	34,53	62,51	0,215	46104	32,56	83113	20,14	65108
Unigene0002190	477	477	A	G	SNP	.	102827	1|1	0|1	0|1	0|1	1|1	0|1	1|1	1|1	0|1	0|1	0|1	1|1	1|1	0|1	0|1	0|1	0|1	1|1	0|1	0,239	92177	47,70	35228	0,155	78,64	0,245	11153	40264	109205	75151	0,165	0,117	49208	34,91	51105	97123	0,44	89108
Unigene0002197	165	165	A	G	SNP	.	4843.87	0|1	0|1	0|1	1|1	0|1	0|1	0|1	1|1	0|1	0|1	0|1	0|1	1|1	0|1	1|1	1|1	0|1	1|1	0|1	23,2	16,4	9,11	0,13	2,7	4,6	1,11	0,7	15,4	18,14	8,5	7,8	0,4	6,18	0,7	0,1	7,3	0,4	10,4
Unigene0002197	188	188	G	C	SNP	.	4987.18	0|1	0|1	0|1	1|1	0|1	0|1	0|1	1|1	0|1	0|1	0|1	0|1	1|1	0|1	1|1	1|1	0|1	1|1	0|1	21,2	10,8	7,10	0,16	2,5	3,5	2,9	0,6	14,8	17,13	10,4	5,7	0,2	4,12	0,10	0,4	4,3	0,3	8,4
Unigene0002210	276	276	G	A	SNP	.	2639.19	0|1	0|1	0|0	0|1	0|1	.|.	0|1	0|1	1|1	.|.	1|1	0|1	1|1	1|1	.|.	0|1	1|1	1|1	1|1	3,11	2,3	2,0	5,1	2,4	.,.	3,4	6,25	0,3	.,.	0,2	2,3	0,1	0,4	.,.	1,2	0,1	0,2	0,9
Unigene0002210	399	399	C	A	SNP	.	425.51	0|0	1|1	1|1	1|1	.|.	.|.	1|1	0|0	1|1	1|1	1|1	.|.	.|.	1|1	1|1	.|.	.|.	.|.	.|.	9,0	0,2	0,1	0,2	.,.	.,.	0,1	24,1	0,2	0,1	0,2	.,.	.,.	0,1	0,2	.,.	.,.	.,.	.,.
Unigene0002213	5242	5242	C	T	SNP	.	5207.81	1|1	0|1	0|1	0|1	0|1	0|1	0|1	1|1	0|1	0|1	0|1	0|1	1|1	0|1	0|1	0|1	1|1	1|1	1|1	0,6	3,14	1,8	6,11	3,5	2,4	7,10	0,5	2,8	2,7	1,6	3,1	0,7	4,6	5,11	5,6	0,11	0,4	0,14
Unigene0002255	200	200	A	C	SNP	.	3438.34	1|1	0|1	0|1	0|1	1|1	1|1	1|1	0|1	0|0	1|1	1|1	1|1	0|1	0|1	1|1	0|1	0|1	1|1	0|1	0,9	3,5	1,6	3,3	0,7	0,1	0,4	2,7	7,0	0,6	0,9	0,5	5,3	1,8	0,4	1,4	3,9	0,2	1,8
Unigene0002255	562	562	T	C	SNP	.	6150.82	0|1	0|1	0|1	1|1	1|1	0|1	0|1	0|1	1|1	0|1	1|1	1|1	0|1	1|1	1|1	0|1	0|1	0|1	0|1	15,6	6,14	9,4	0,17	0,6	9,6	4,7	18,5	0,8	2,21	0,16	0,11	4,4	1,10	0,7	2,5	2,12	3,3	3,10
Unigene0002261	197	197	C	T	SNP	.	5050.28	1|1	0|1	1|1	0|1	1|1	0|1	0|1	1|1	0|1	0|1	0|1	1|1	1|1	1|1	0|1	1|1	1|1	1|1	1|1	0,26	7,11	0,3	5,7	0,3	2,4	10,4	0,6	1,7	2,5	3,7	0,2	0,6	0,14	4,7	0,4	0,10	0,1	0,6
Unigene0002261	441	441	G	C	SNP	.	3822.22	0|1	0|1	0|1	1|1	.|.	1|1	0|1	0|0	1|1	1|1	1|1	0|1	1|1	0|1	1|1	1|1	1|1	1|1	1|1	11,1	6,4	1,4	0,13	.,.	0,6	9,6	6,0	0,6	0,10	0,5	1,5	0,4	9,14	0,9	0,5	0,5	0,6	0,4
Unigene0002261	462	462	C	T	SNP	.	2520.05	0|0	0|1	0|1	0|1	.|.	1|1	0|1	0|0	1|1	1|1	1|1	0|1	0|1	0|1	1|1	1|1	0|1	0|1	0|1	16,0	4,7	1,5	7,5	.,.	0,4	9,4	7,0	0,5	0,3	0,4	1,1	1,3	7,14	0,11	0,3	2,3	1,3	2,1
Unigene0002266	284	284	T	C	SNP	.	5717.27	1|1	0|1	1|1	1|1	1|1	0|1	1|1	1|1	0|1	.|.	1|1	.|.	0|1	1|1	0|1	0|0	0|1	.|.	0|1	0,8	72,45	0,8	0,24	0,3	120,12	0,1	0,9	8,5	.,.	0,3	.,.	36,5	0,19	140,13	45,2	67,10	.,.	52,17
Unigene0002266	1074	1074	T	C	SNP	.	38240	1|1	0|1	0|1	1|1	0|1	0|1	1|1	1|1	0|1	.|.	0|1	0|1	1|1	0|1	0|1	1|1	1|1	1|1	1|1	0,54	47,88	47,40	0,229	4,8	146,42	0,16	0,10	81,58	.,.	25,25	7,31	1,54	251152	68,33	0,66	0,66	0,1	0,46
Unigene0002266	1439	1439	C	A	SNP	.	53306.8	1|1	0|1	0|1	0|1	0|1	1|1	0|1	0|1	1|1	.|.	0|1	0|1	0|1	0|1	1|1	0|1	1|1	.|.	1|1	0,13	74154	48,7	270,88	9,3	0,192	20,5	4,3	3124	.,.	45,17	56,5	16,66	34,83	0,153	27110	0,172	.,.	0,182
Unigene0002274	170	170	A	G	SNP	.	1247.9	.|.	0|1	.|.	1|1	0|0	.|.	0|0	1|1	1|1	0|1	0|0	.|.	1|1	.|.	1|1	1|1	.|.	1|1	.|.	.,.	9,5	.,.	0,1	1,0	.,.	1,0	0,3	0,2	8,8	1,0	.,.	0,1	.,.	0,4	0,1	.,.	0,7	.,.
Unigene0002274	298	298	A	G	SNP	.	2824.59	.|.	0|1	.|.	1|1	1|1	1|1	1|1	1|1	.|.	0|1	1|1	.|.	1|1	0|0	1|1	1|1	.|.	1|1	.|.	.,.	15,14	.,.	0,1	0,2	0,4	0,10	0,8	.,.	7,20	0,2	.,.	0,2	1,0	0,3	0,2	.,.	0,11	.,.
Unigene0002274	766	766	T	C	SNP	.	2219.79	1|1	0|1	1|1	0|1	1|1	0|1	0|1	0|1	.|.	0|1	0|1	.|.	0|0	1|1	1|1	1|1	.|.	0|1	0|0	0,1	12,25	0,1	2,1	0,2	1,1	6,11	1,1	.,.	13,8	1,1	.,.	2,0	0,1	0,1	0,8	.,.	6,5	1,0
Unigene0002274	832	832	A	T	SNP	.	2103.25	1|1	0|1	0|0	1|1	0|0	1|1	0|1	1|1	.|.	0|1	0|0	1|1	.|.	0|1	1|1	0|1	.|.	1|1	.|.	0,2	14,25	1,0	0,5	3,0	0,1	15,8	0,2	.,.	5,8	2,0	0,1	.,.	1,1	0,3	6,1	.,.	0,5	.,.
Unigene0002274	1119	1119	G	T	SNP	.	4255.36	1|1	0|1	.|.	1|1	0|1	1|1	1|1	1|1	.|.	0|1	1|1	0|0	0|0	1|1	0|1	1|1	.|.	0|1	.|.	0,2	25,32	.,.	0,5	1,1	0,6	1,27	0,3	.,.	11,15	0,3	1,0	5,0	0,4	1,6	0,4	.,.	20,11	.,.
Unigene0002276	49	49	T	C	SNP	.	20407.7	0|1	1|1	1|1	1|1	1|1	0|1	0|1	0|1	1|1	1|1	1|1	1|1	0|1	0|1	0|1	0|1	1|1	1|1	1|1	39,24	0,73	2,19	0,45	0,14	11,35	18,21	41,33	3,52	0,31	0,30	0,8	6,20	30,11	4,3	18,7	0,18	0,40	0,49
Unigene0002276	1615	1615	C	G	SNP	.	41713.5	1|1	1|1	1|1	0|1	1|1	1|1	0|1	1|1	0|1	1|1	1|1	1|1	0|1	1|1	0|1	1|1	0|1	0|1	0|1	0,52	1,56	0,64	7,69	0,50	0,74	12,58	0,70	7,62	0,84	0,72	0,49	13,20	0,88	8,33	0,33	9,55	3,33	10,88
Unigene0002277	508	508	A	G	SNP	.	3746.48	1|1	0|1	1|1	1|1	1|1	1|1	1|1	1|1	0|1	1|1	0|1	1|1	0|1	1|1	1|1	0|0	0|1	1|1	0|1	0,6	1,3	0,4	0,14	0,3	0,6	0,2	0,11	3,9	0,3	1,5	0,4	5,4	0,6	0,7	5,0	4,5	0,3	1,4
Unigene0002277	522	522	A	G	SNP	.	4230.89	1|1	0|1	1|1	1|1	1|1	1|1	1|1	1|1	0|1	1|1	0|1	1|1	0|1	0|1	0|1	0|0	0|1	1|1	0|1	0,6	1,5	0,6	0,17	0,3	0,6	0,2	0,14	3,13	0,5	1,5	0,4	6,4	1,7	1,7	5,0	4,5	0,4	1,4
Unigene0002277	635	635	C	T	SNP	.	4119.48	1|1	0|1	.|.	1|1	1|1	1|1	0|1	1|1	0|1	1|1	1|1	1|1	0|1	1|1	0|1	1|1	0|1	1|1	1|1	0,12	3,13	.,.	0,16	0,6	0,3	2,4	0,17	3,4	0,3	0,7	0,3	1,1	0,10	3,4	0,1	3,8	0,5	0,1
Unigene0002279	222	222	A	C	SNP	.	2932.3	0|1	1|1	1|1	1|1	1|1	0|1	1|1	0|1	1|1	1|1	1|1	1|1	1|1	0|1	1|1	1|1	0|1	1|1	0|0	3,3	0,7	0,4	0,6	0,3	2,5	0,3	6,2	0,2	0,8	0,2	0,5	0,5	5,9	0,5	0,1	10,2	0,1	2,0
Unigene0002280	1104	1104	A	G	SNP	.	644.15	1|1	0|0	.|.	1|1	0|1	0|0	1|1	1|1	.|.	0|1	0|0	1|1	0|0	1|1	0|1	0|0	0|0	0|0	0|0	0,5	22,1	.,.	0,3	1,1	3,0	0,2	0,3	.,.	3,1	4,0	0,2	5,0	0,1	4,1	2,0	4,0	2,0	4,0
Unigene0002280	1164	1164	C	G	SNP	.	2370.59	1|1	0|1	1|1	1|1	0|0	0|1	1|1	1|1	0|1	0|1	1|1	0|0	1|1	1|1	1|1	1|1	0|1	0|0	0|1	0,10	10,14	0,2	0,4	2,0	1,3	0,4	0,3	2,2	2,3	0,4	2,0	0,3	0,3	0,2	0,3	2,1	1,0	1,6
Unigene0002280	1188	1188	G	T	SNP	.	2317.02	0|1	1|1	0|0	0|1	1|1	0|1	0|1	0|1	0|1	0|1	0|1	1|1	1|1	0|1	1|1	1|1	0|1	1|1	0|1	5,4	1,18	2,0	1,3	0,2	1,3	2,5	2,2	1,5	2,2	2,2	0,2	0,1	1,3	0,1	0,3	2,1	0,1	1,5
Unigene0002280	1246	1246	C	T	SNP	.	654.92	1|1	1|1	0|1	0|0	.|.	.|.	0|1	1|1	0|0	1|1	1|1	1|1	.|.	0|1	0|1	.|.	0|0	.|.	0|0	0,1	0,2	2,1	1,0	.,.	.,.	2,3	0,2	6,0	0,2	0,5	0,1	.,.	4,1	1,1	.,.	3,0	.,.	6,0
Unigene0002280	1249	1249	C	T	SNP	.	1446.17	0|0	1|1	1|1	1|1	.|.	.|.	1|1	0|0	1|1	1|1	1|1	1|1	.|.	1|1	0|1	.|.	1|1	.|.	1|1	1,0	0,1	0,3	0,1	.,.	.,.	0,3	2,0	0,6	0,2	0,5	0,1	.,.	0,4	1,1	.,.	0,3	.,.	0,5
Unigene0002286	214	214	T	C	SNP	.	1745.2	0|1	0|1	0|0	0|1	1|1	0|1	1|1	0|1	1|1	1|1	0|1	1|1	1|1	0|1	0|1	0|1	0|1	0|1	0|1	2,1	1,5	5,0	3,3	0,2	3,3	0,5	4,2	0,3	0,3	1,1	0,1	0,2	1,6	2,3	7,3	2,4	1,1	3,2
Unigene0002286	616	616	C	T	SNP	.	1516.51	0|1	0|1	1|1	1|1	0|1	0|1	1|1	0|1	1|1	0|1	1|1	0|0	1|1	0|1	1|1	.|.	1|1	1|1	1|1	2,3	6,7	0,2	0,2	1,2	1,2	0,2	2,4	0,2	4,1	0,2	1,0	0,1	2,5	0,3	.,.	0,1	0,3	0,1
Unigene0002291	973	973	A	T	SNP	.	3293.91	0|1	1|1	0|1	1|1	.|.	0|0	1|1	0|1	0|1	1|1	0|1	1|1	1|1	0|1	0|1	0|1	1|1	1|1	1|1	6,6	0,10	1,4	0,16	.,.	1,0	0,7	2,5	1,1	0,6	3,7	0,2	0,11	1,4	2,8	1,3	0,2	0,3	0,2
Unigene0002294	61	61	T	-	Deletion	.	748.39	.|.	1|1	0|1	0|0	0|1	1|1	0|1	1|1	0|1	1|1	.|.	1|1	0|0	0|1	.|.	1|1	0|1	.|.	0|0	.,.	0,2	2,1	2,0	5,2	0,3	3,2	0,1	6,3	0,1	.,.	0,5	4,0	4,1	.,.	0,3	4,1	.,.	3,0
Unigene0002300	641	641	A	G	SNP	.	1160.9	.|.	.|.	0|1	.|.	.|.	1|1	0|0	1|1	1|1	0|0	.|.	.|.	1|1	.|.	1|1	.|.	1|1	.|.	1|1	.,.	.,.	1,2	.,.	.,.	0,2	1,0	0,1	0,1	1,0	.,.	.,.	0,3	.,.	0,5	.,.	0,5	.,.	0,11
Unigene0002301	2138	2138	A	C	SNP	.	5141.22	0|1	0|1	1|1	1|1	0|1	1|1	1|1	1|1	1|1	1|1	1|1	1|1	0|0	0|1	0|1	0|1	1|1	0|1	1|1	1,8	13,18	0,6	0,10	2,6	0,8	0,7	0,4	0,5	1,14	0,13	0,6	5,0	2,6	4,2	2,10	0,5	1,1	0,10
Unigene0002307	246	246	C	T	SNP	.	6363.75	0|1	1|1	0|1	0|1	1|1	0|1	0|1	1|1	1|1	1|1	1|1	0|1	1|1	0|1	1|1	1|1	0|1	0|1	1|1	2,8	0,4	1,10	6,9	0,15	4,2	7,8	0,19	0,8	0,6	0,16	1,10	0,6	13,18	0,2	0,8	1,12	2,2	0,4
Unigene0002307	1465	1465	G	C	SNP	.	12743	0|1	1|1	0|1	1|1	0|1	0|1	0|1	1|1	0|1	0|1	0|1	0|1	0|1	0|1	1|1	1|1	0|1	1|1	0|1	4,21	4,28	8,11	0,15	4,15	1,4	5,23	0,24	2,23	3,25	7,14	4,13	2,7	6,32	2,26	0,18	8,24	0,9	5,19
Unigene0002309	144	144	T	C	SNP	.	3047.61	1|1	1|1	0|0	0|1	0|1	1|1	0|1	1|1	1|1	1|1	1|1	0|1	1|1	0|1	.|.	0|0	0|1	1|1	0|1	0,4	0,16	3,0	4,4	3,7	0,1	10,6	0,8	0,7	0,8	0,3	3,2	0,1	7,2	.,.	3,0	4,4	0,4	2,4
Unigene0002309	516	516	C	T	SNP	.	4154.79	0|0	1|1	1|1	0|1	1|1	1|1	0|1	0|1	0|1	1|1	0|1	1|1	0|1	0|1	.|.	0|1	0|1	0|1	0|1	1,0	0,22	0,6	3,7	0,4	0,10	2,12	5,2	5,8	0,6	3,2	0,8	1,4	3,10	.,.	2,1	6,5	3,3	2,6
Unigene0002309	1005	1005	A	G	SNP	.	11652.7	1|1	1|1	1|1	0|1	0|1	1|1	1|1	1|1	1|1	0|1	0|1	0|1	1|1	1|1	1|1	0|1	1|1	1|1	1|1	0,16	0,42	0,14	10,13	4,17	0,10	1,21	2,17	1,26	3,10	1,12	5,11	0,7	0,25	0,9	3,5	0,24	0,11	0,11
Unigene0002315	734	734	A	G	SNP	.	16091.8	0|1	1|1	0|1	1|1	1|1	0|1	1|1	1|1	0|1	0|1	1|1	0|1	0|1	0|1	0|1	0|1	0|1	0|1	0|1	4,26	0,47	11,23	0,24	1,17	4,10	0,14	0,19	6,35	6,15	0,27	3,10	2,22	12,34	3,20	2,14	4,47	1,8	7,24
Unigene0002319	953	953	A	G	SNP	.	892.9	1|1	0|1	.|.	1|1	1|1	0|1	1|1	0|0	1|1	0|0	1|1	0|1	1|1	0|0	1|1	.|.	1|1	.|.	1|1	0,4	1,4	.,.	0,2	0,1	1,1	0,1	1,0	0,1	2,0	0,2	0,2	0,2	1,0	0,1	.,.	0,2	.,.	0,1
Unigene0002319	1677	1677	C	T	SNP	.	1296.1	1|1	0|1	.|.	0|1	0|1	1|1	0|0	0|1	0|0	1|1	0|1	1|1	0|1	0|1	0|1	1|1	0|0	.|.	1|1	0,3	2,2	.,.	2,3	2,1	0,2	2,0	2,3	3,0	0,1	2,1	0,5	6,3	2,6	2,4	0,3	5,0	.,.	0,1
Unigene0002332	2595	2595	G	A	SNP	.	2418.89	1|1	1|1	1|1	0|1	1|1	0|1	0|1	1|1	0|1	0|1	0|1	1|1	0|0	1|1	0|1	1|1	0|1	0|1	1|1	0,6	0,3	0,4	10,7	0,2	11,3	1,2	0,1	9,3	6,1	6,3	0,1	7,0	0,12	1,6	0,2	1,5	1,1	0,2
Unigene0002332	2600	2600	C	T	SNP	.	2191.99	1|1	1|1	1|1	0|1	1|1	0|1	0|1	1|1	0|1	0|0	0|1	1|1	0|1	1|1	0|1	1|1	0|1	0|1	1|1	0,4	0,3	0,4	10,6	0,2	11,3	1,2	.	8,2	6,0	6,2	0,1	7,1	0,8	1,4	0,2	1,4	1,1	0,2
Unigene0002332	2627	2627	A	T	SNP	.	2340.75	1|1	1|1	.|.	0|1	0|1	1|1	1|1	1|1	1|1	0|1	1|1	.|.	0|1	0|1	0|1	0|0	0|1	.|.	.|.	0,4	0,1	.,.	2,11	1,2	1,10	0,2	0,2	0,5	3,5	0,6	.,.	1,8	4,2	1,3	1,0	1,1	.,.	.,.
Unigene0002337	285	285	C	T	SNP	.	1170.66	1|1	0|1	0|1	0|1	0|0	1|1	0|1	0|0	0|1	1|1	1|1	0|1	1|1	0|1	0|1	1|1	0|1	1|1	0|1	0,3	15,4	6,3	3,2	6,0	0,2	6,3	.	12,2	0,4	0,2	4,2	0,2	6,1	11,3	0,1	6,2	0,1	3,1
Unigene0002337	933	933	G	T	SNP	.	4822.87	1|1	1|1	0|1	0|1	0|1	1|1	0|1	1|1	0|1	1|1	1|1	0|1	1|1	0|1	0|1	1|1	0|1	.|.	0|1	0,9	0,12	5,9	3,3	2,1	0,4	10,8	0,5	6,16	0,14	0,6	1,9	0,4	3,7	6,5	0,4	6,7	.,.	5,5
Unigene0002338	616	616	A	G	SNP	.	4864.96	0|1	1|1	1|1	0|1	0|1	1|1	0|1	0|1	0|1	1|1	1|1	0|1	0|1	0|1	1|1	0|1	0|1	1|1	0|1	8,3	0,9	0,6	9,5	3,8	0,7	8,7	23,10	5,13	0,1	0,7	2,20	2,12	3,3	0,1	4,4	2,9	0,2	6,4
Unigene0002338	1618	1618	G	C	SNP	.	2192.13	0|1	0|1	1|1	1|1	0|1	1|1	0|1	0|1	0|1	.|.	1|1	0|1	0|1	1|1	.|.	1|1	0|1	0|1	0|1	10,3	3,9	0,2	0,6	3,2	0,4	4,3	12,4	5,1	.,.	0,1	15,9	5,7	0,6	.,.	0,1	3,2	1,2	4,2
Unigene0002338	1624	1624	A	G	SNP	.	2233.29	0|1	1|1	1|1	1|1	0|1	1|1	0|1	0|1	0|1	.|.	1|1	0|1	0|1	1|1	.|.	1|1	0|1	0|1	0|1	10,3	0,8	0,2	0,3	4,2	0,2	4,3	12,4	5,1	.,.	0,1	12,12	5,4	0,5	.,.	0,1	3,1	1,1	4,2
Unigene0002338	1657	1657	C	T	SNP	.	2675.18	0|1	1|1	1|1	1|1	0|0	1|1	0|1	0|0	0|1	0|1	1|1	0|1	0|1	1|1	.|.	1|1	0|1	1|1	0|0	10,3	0,6	0,6	0,5	6,0	0,3	7,4	18,0	9,2	1,2	0,6	22,12	5,6	0,3	.,.	0,4	8,3	0,1	7,0
Unigene0002338	1660	1660	G	A	SNP	.	2747.86	0|1	1|1	1|1	1|1	0|0	1|1	0|1	0|0	0|1	0|1	1|1	0|1	0|1	1|1	.|.	1|1	0|1	1|1	0|0	10,3	0,7	0,6	0,5	6,0	0,3	7,5	18,0	9,2	1,3	0,6	22,12	5,6	0,4	.,.	0,4	8,3	0,1	7,0
Unigene0002338	3833	3833	A	G	SNP	.	17649.3	0|1	1|1	1|1	1|1	0|1	1|1	0|1	0|1	0|1	0|1	1|1	0|1	0|1	1|1	0|1	0|1	0|1	0|1	0|1	6,11	0,33	0,23	0,34	9,22	0,15	5,22	6,24	20,24	4,23	0,21	18,59	9,40	0,34	2,2	5,17	9,36	1,9	4,17
Unigene0002338	4190	4190	C	G	SNP	.	11931.9	1|1	1|1	1|1	0|1	0|1	1|1	0|1	1|1	0|1	1|1	1|1	0|1	1|1	0|1	1|1	0|1	0|1	1|1	0|1	0,22	0,22	0,14	12,7	4,10	1,16	7,5	0,22	2,26	0,24	0,4	9,32	0,16	8,4	0,1	2,9	5,20	0,10	2,15
Unigene0002338	5148	5148	C	A	SNP	.	4790.74	0|0	1|1	1|1	0|1	0|1	0|1	0|1	0|1	0|1	1|1	0|1	0|1	1|1	0|1	1|1	0|1	0|1	1|1	0|1	29,0	0,10	0,9	17,3	8,4	4,9	12,10	19,5	3,9	0,11	0,6	16,24	0,5	19,12	0,7	3,7	9,12	0,1	6,3
Unigene0002339	124	124	A	G	SNP	.	2188.91	1|1	0|1	.|.	0|1	1|1	0|0	0|1	1|1	1|1	0|1	1|1	0|0	.|.	0|1	0|1	0|1	0|0	1|1	0|1	0,5	31,16	.,.	12,6	0,1	2,0	42,5	0,10	0,2	8,13	0,2	2,0	.,.	2,2	10,1	18,9	6,0	0,2	5,1
Unigene0002339	751	751	A	G	SNP	.	6688.41	1|1	0|1	1|1	0|1	1|1	0|1	0|0	0|1	0|1	0|1	1|1	0|1	1|1	0|1	0|0	0|1	0|1	1|1	1|1	0,7	19,4	0,8	6,12	0,7	2,10	16,0	4,28	1,4	9,8	0,13	2,7	0,11	1,4	12,0	16,6	1,10	0,4	0,11
Unigene0002339	762	762	G	T	SNP	.	8096.54	1|1	0|1	1|1	0|1	1|1	0|1	0|1	0|1	1|1	0|1	1|1	0|1	1|1	0|1	0|1	0|1	0|1	1|1	1|1	0,8	17,7	0,10	5,19	0,7	2,11	16,7	4,29	0,6	9,9	0,15	2,11	0,14	1,4	11,1	17,12	1,14	0,6	0,12
Unigene0002346	295	295	A	G	SNP	.	6350.08	0|1	0|1	1|1	0|1	1|1	1|1	0|1	0|1	1|1	0|0	0|1	1|1	0|1	0|1	1|1	0|1	0|1	0|1	0|1	8,18	16,9	0,5	12,4	0,4	0,4	7,32	1,3	2,32	24,1	13,4	0,1	6,19	13,8	0,9	5,28	10,1	8,3	14,11
Unigene0002346	413	413	C	G	SNP	.	5392.85	0|0	1|1	0|1	1|1	0|1	0|1	1|1	0|0	0|1	0|0	0|1	0|1	0|1	1|1	1|1	1|1	1|1	1|1	1|1	10,0	0,21	3,2	0,2	4,3	3,4	0,10	1,0	0,11	8,0	4,3	2,2	0,11	0,8	0,3	0,8	0,5	0,10	0,9
Unigene0002356	100	100	A	G	SNP	.	4012.95	1|1	1|1	0|1	1|1	1|1	0|1	0|1	1|1	0|1	1|1	0|1	1|1	0|1	1|1	1|1	1|1	0|1	0|1	0|1	0,13	0,7	11,4	0,13	0,5	15,4	2,4	0,7	57,6	0,2	13,3	0,3	18,2	1,16	0,16	0,3	50,6	2,1	32,4
Unigene0002356	282	282	C	T	SNP	.	13982.7	1|1	0|1	0|1	1|1	1|1	0|1	1|1	1|1	0|1	0|1	0|1	1|1	0|1	1|1	1|1	1|1	0|1	0|1	0|1	0,43	5,45	13,6	0,31	0,8	20,19	1,30	1,19	36,21	8,22	19,6	0,11	9,16	0,20	0,22	0,22	35,36	7,5	25,26
Unigene0002373	1155	1155	T	C	SNP	.	8785.22	1|1	1|1	1|1	0|1	0|1	0|1	1|1	0|1	0|1	0|1	0|1	1|1	0|1	1|1	1|1	1|1	0|1	0|1	0|1	0,4	0,13	0,11	7,14	3,11	3,8	0,18	6,11	3,23	9,25	4,16	0,12	5,8	0,15	0,2	0,19	2,11	4,11	4,20
Unigene0002380	215	215	A	C	SNP	.	2306.75	1|1	0|1	1|1	0|0	.|.	1|1	0|1	1|1	1|1	1|1	1|1	.|.	1|1	0|1	.|.	1|1	1|1	1|1	1|1	0,3	3,7	0,2	9,0	.,.	0,3	3,2	0,3	0,6	0,7	0,5	.,.	0,5	5,9	.,.	0,1	0,4	0,1	0,1
Unigene0002380	902	902	T	C	SNP	.	1478.04	1|1	0|1	1|1	0|1	.|.	1|1	0|1	.|.	0|1	0|1	0|1	1|1	1|1	0|1	0|1	0|1	0|1	1|1	1|1	0,3	5,3	0,2	7,1	.,.	0,5	7,2	.,.	1,3	2,2	3,2	0,3	0,4	10,4	1,3	1,1	2,3	0,1	0,1
Unigene0002380	1216	1216	A	G	SNP	.	2000.81	0|0	0|1	0|1	0|1	0|0	0|1	0|1	0|0	0|1	1|1	0|1	0|1	0|1	1|1	0|1	1|1	1|1	1|1	1|1	11,0	4,6	3,2	4,10	3,0	1,1	1,5	3,0	1,4	0,2	8,2	1,1	8,1	0,17	4,2	0,2	0,5	0,1	0,1
Unigene0002380	1813	1813	C	T	SNP	.	417.46	0|0	0|0	1|1	0|0	0|0	0|0	1|1	0|0	1|1	0|1	.|.	1|1	1|1	0|0	0|1	0|0	0|0	1|1	0|0	4,0	8,0	0,1	6,0	4,0	1,0	0,1	8,0	0,4	2,1	.,.	0,1	0,1	9,0	8,3	3,0	3,0	0,2	2,0
Unigene0002380	2005	2005	C	T	SNP	.	723.89	1|1	0|1	.|.	0|0	1|1	1|1	0|0	1|1	1|1	0|1	1|1	.|.	1|1	0|0	0|1	0|1	.|.	.|.	0|0	0,4	8,1	.,.	9,0	0,1	0,1	1,0	0,2	0,2	2,2	0,1	.,.	0,1	8,0	4,5	2,1	.,.	.,.	1,0
Unigene0002381	486	486	T	C	SNP	.	9959.29	0|0	0|1	1|1	0|1	1|1	0|1	0|1	0|1	1|1	0|1	0|1	0|1	0|1	0|1	1|1	0|1	1|1	0|1	1|1	27,0	5,36	0,7	11,17	0,9	3,12	7,23	3,9	1,16	4,11	9,21	2,9	5,16	11,23	0,11	5,10	0,12	5,5	1,20
Unigene0002385	423	423	G	A	SNP	.	526.23	1|1	.|.	.|.	.|.	1|1	0|0	1|1	1|1	0|0	0|0	0|0	1|1	1|1	0|1	1|1	0|0	0|0	1|1	0|0	0,1	.,.	.,.	.,.	0,2	6,0	0,4	0,2	1,0	2,0	3,0	0,1	0,3	1,1	0,1	2,0	7,0	0,1	3,0
Unigene0002394	204	204	C	T	SNP	.	1633.01	0|1	1|1	1|1	1|1	0|1	1|1	0|1	1|1	0|0	1|1	0|1	1|1	.|.	0|1	1|1	1|1	0|1	0|0	0|1	1,2	0,4	0,2	0,6	1,4	0,2	2,6	0,2	2,0	0,1	2,3	0,2	.,.	8,5	0,1	0,3	1,2	1,0	4,4
Unigene0002396	216	216	G	T	SNP	.	4070.07	1|1	0|1	1|1	0|1	1|1	0|1	0|1	1|1	0|1	0|1	0|0	1|1	0|1	0|1	1|1	1|1	0|1	1|1	0|1	0,15	1,2	0,2	1,9	0,2	1,3	2,2	0,36	4,4	1,2	1,0	0,5	1,4	2,8	0,3	0,5	1,5	0,3	1,1
Unigene0002396	310	310	C	T	SNP	.	482.92	0|0	1|1	.|.	.|.	0|0	1|1	0|0	0|0	0|1	.|.	.|.	0|0	0|1	0|0	1|1	1|1	0|1	1|1	1|1	15,0	0,1	.,.	.,.	1,0	0,1	2,0	29,0	4,1	.,.	.,.	1,0	3,2	2,0	0,3	0,2	3,3	0,1	0,1
Unigene0002396	732	732	A	G	SNP	.	1501.66	0|0	1|1	1|1	1|1	1|1	1|1	1|1	0|1	0|1	0|1	1|1	1|1	0|1	.|.	.|.	.|.	1|1	0|1	1|1	24,0	0,3	0,2	0,1	0,3	0,3	0,1	41,9	2,7	1,2	0,3	0,1	8,2	.,.	.,.	.,.	0,4	6,1	0,4
Unigene0002396	843	843	G	T	SNP	.	957.19	0|1	0|1	1|1	1|1	0|1	1|1	1|1	0|0	0|1	0|1	.|.	0|1	0|1	0|1	.|.	1|1	1|1	0|1	0|0	16,3	1,3	0,4	0,2	1,3	0,2	0,1	26,0	2,1	2,2	.,.	1,3	2,1	3,4	.,.	0,1	0,2	5,1	2,0
Unigene0002396	869	869	G	A	SNP	.	2345.85	1|1	1|1	0|1	1|1	0|1	0|1	0|1	1|1	0|1	1|1	.|.	0|1	0|1	0|1	.|.	1|1	0|1	0|1	1|1	0,13	0,2	3,2	0,4	2,1	2,1	1,3	1,22	3,1	0,2	.,.	2,1	1,2	4,1	.,.	0,1	1,1	4,3	0,1
Unigene0002396	1209	1209	A	G	SNP	.	1391.78	0|0	1|1	1|1	.|.	.|.	1|1	1|1	0|0	0|1	0|1	1|1	1|1	0|1	0|1	1|1	0|1	0|1	0|1	.|.	11,0	0,2	0,2	.,.	.,.	0,5	0,1	33,2	2,2	2,1	0,1	0,2	4,6	1,9	0,2	1,2	1,7	5,1	.,.
Unigene0002397	45	45	G	A	SNP	.	2153.9	0|1	0|1	0|1	0|1	0|0	0|1	0|1	1|1	0|1	1|1	0|1	1|1	0|1	0|1	1|1	0|0	1|1	1|1	1|1	1,4	2,3	1,1	6,7	1,0	1,2	3,3	0,1	4,1	0,1	2,9	0,1	2,2	2,9	0,4	4,0	0,4	0,1	0,5
Unigene0002397	258	258	C	A	SNP	.	9369.7	0|1	1|1	1|1	0|1	1|1	1|1	0|1	0|1	0|1	0|1	1|1	1|1	0|1	0|1	0|1	1|1	0|1	0|1	0|1	11,4	0,25	1,5	18,20	0,9	0,8	14,17	3,3	11,18	1,6	0,11	0,9	7,10	28,20	3,17	0,10	10,20	4,6	10,26
Unigene0002398	216	216	A	C	SNP	.	1187.43	.|.	1|1	1|1	0|1	1|1	0|1	0|1	0|1	0|1	0|1	0|1	1|1	.|.	0|1	1|1	0|1	.|.	.|.	1|1	.,.	0,1	0,2	3,1	0,1	1,1	1,5	1,3	3,2	4,1	1,1	0,1	.,.	2,4	0,1	1,4	.,.	.,.	0,6
Unigene0002408	225	225	A	G	SNP	.	14387.4	0|1	1|1	1|1	1|1	1|1	1|1	1|1	0|1	1|1	0|1	1|1	1|1	1|1	0|1	1|1	1|1	0|1	0|1	0|1	26,12	0,59	0,15	0,34	0,8	0,18	0,14	35,15	1,22	8,23	0,24	0,10	0,14	13,23	0,21	0,22	6,15	9,17	9,20
Unigene0002410	949	949	G	T	SNP	.	8699.37	0|1	1|1	0|1	0|1	1|1	0|1	1|1	0|1	0|1	0|1	0|1	1|1	0|1	1|1	1|1	1|1	0|1	0|0	0|1	24,6	1,21	6,13	20,15	0,14	8,11	0,12	10,3	5,11	1,2	2,18	0,20	10,10	0,47	0,6	0,8	6,13	4,0	3,16
Unigene0002414	470	470	A	G	SNP	.	7419.64	0|1	1|1	1|1	0|1	1|1	1|1	0|1	1|1	0|1	1|1	1|1	1|1	1|1	1|1	0|1	0|1	0|1	1|1	0|1	8,6	0,20	0,7	4,19	0,9	0,9	5,11	0,7	2,7	0,14	0,8	0,7	0,18	1,15	3,22	5,7	1,8	0,5	5,16
Unigene0002416	970	970	A	G	SNP	.	16893.4	1|1	0|1	1|1	0|1	1|1	0|1	1|1	1|1	0|1	1|1	1|1	1|1	1|1	1|1	0|1	1|1	0|1	1|1	0|1	0,38	31,26	0,18	12,33	0,7	5,13	0,19	0,41	17,38	0,23	0,35	0,16	1,12	0,27	7,14	0,9	11,26	0,10	5,29
Unigene0002418	217	217	A	G	SNP	.	1141.85	1|1	.|.	1|1	1|1	0|0	1|1	.|.	.|.	.|.	0|0	1|1	1|1	1|1	1|1	1|1	1|1	0|1	.|.	0|0	0,3	.,.	0,1	0,6	1,0	0,2	.,.	.,.	.,.	1,0	0,1	0,2	0,7	0,1	0,8	0,2	1,1	.,.	1,0
Unigene0002418	309	309	T	C	SNP	.	4459.54	1|1	1|1	0|1	0|1	1|1	0|1	1|1	1|1	0|1	1|1	0|1	1|1	0|1	1|1	0|1	0|1	1|1	1|1	1|1	0,13	0,13	2,5	10,4	0,5	2,4	0,7	0,3	1,6	0,9	3,6	0,4	13,3	0,6	10,6	6,4	0,6	0,3	0,8
Unigene0002422	299	299	A	T	SNP	.	2051.68	0|1	0|1	1|1	1|1	1|1	1|1	0|0	0|1	0|1	0|1	.|.	.|.	0|1	1|1	0|1	.|.	0|1	0|0	1|1	3,3	1,6	0,5	0,3	0,3	0,3	2,0	2,1	0,11	1,1	.,.	.,.	1,7	0,3	1,1	.,.	1,5	1,0	0,4
Unigene0002422	467	467	A	G	SNP	.	1687.36	1|1	0|1	1|1	0|0	.|.	0|1	1|1	1|1	0|0	0|0	0|1	1|1	1|1	0|0	1|1	.|.	0|1	.|.	0|1	1,11	14,7	0,11	2,0	.,.	11,4	0,3	0,5	46,1	2,0	3,2	0,1	0,2	8,0	0,1	.,.	12,2	.,.	5,3
Unigene0002422	539	539	G	T	SNP	.	2573.97	0|1	0|1	1|1	1|1	.|.	0|1	1|1	1|1	0|1	0|0	1|1	.|.	.|.	1|1	1|1	.|.	0|1	.|.	0|1	4,8	14,6	0,14	0,1	.,.	10,1	0,2	0,8	52,15	5,0	0,1	.,.	.,.	0,10	0,2	.,.	7,5	.,.	8,3
Unigene0002422	1024	1024	T	C	SNP	.	4054.6	1|1	0|1	0|1	1|1	1|1	0|1	0|0	1|1	0|1	1|1	0|0	1|1	0|1	0|1	1|1	0|0	0|1	.|.	0|1	0,5	8,16	9,9	0,5	0,1	4,7	5,0	0,7	9,19	0,1	1,0	0,2	7,2	6,5	0,5	1,0	15,23	.,.	3,8
Unigene0002425	217	217	C	T	SNP	.	10010.2	1|1	1|1	0|1	0|1	0|1	0|1	0|1	0|1	1|1	1|1	1|1	1|1	0|1	1|1	0|1	0|1	0|1	0|1	0|1	0,8	0,27	2,6	6,25	3,13	3,12	7,8	7,11	0,19	0,29	0,17	0,11	3,14	1,14	6,21	2,15	2,17	2,11	5,14
Unigene0002425	2464	2464	A	G	SNP	.	6085.24	0|0	1|1	1|1	0|1	0|1	1|1	1|1	0|1	1|1	1|1	1|1	0|1	0|1	0|1	1|1	1|1	1|1	0|1	1|1	6,0	0,16	0,13	13,1	4,3	0,4	0,10	3,9	0,9	0,9	0,21	7,3	4,7	13,19	0,3	0,9	0,9	6,4	0,12
Unigene0002425	2498	2498	G	C	SNP	.	1833.03	1|1	1|1	0|0	0|0	0|0	0|1	1|1	1|1	1|1	0|1	0|1	0|1	0|1	0|1	1|1	1|1	1|1	0|0	1|1	0,9	0,6	4,0	12,0	3,0	3,1	0,2	0,8	0,1	3,2	10,2	5,1	10,2	11,8	0,2	0,4	0,1	6,0	0,3
Unigene0002443	883	883	A	C	SNP	.	38414.7	1|1	1|1	0|1	0|1	0|1	0|1	1|1	1|1	1|1	1|1	1|1	0|1	0|1	0|1	0|1	0|1	1|1	1|1	0|1	0,53	0,107	6,32	19,69	9,45	9,20	0,106	0,60	2,54	0,94	0,64	5,22	7,21	8,84	7,41	8,35	5,45	0,25	8,64
Unigene0002443	913	913	T	C	SNP	.	38286.9	1|1	1|1	0|1	0|1	0|1	0|1	1|1	1|1	1|1	1|1	1|1	0|1	0|1	0|1	0|1	0|1	0|1	1|1	0|1	0,55	0,117	5,27	19,67	7,44	10,22	0,95	0,54	3,56	0,87	0,71	6,24	10,21	8,86	5,47	6,33	6,50	0,19	8,68
Unigene0002444	716	716	T	C	SNP	.	736.83	1|1	1|1	0|1	.|.	0|0	0|0	1|1	0|1	0|0	0|1	0|1	1|1	0|1	0|1	1|1	1|1	0|0	1|1	0|1	0,3	0,1	3,1	.,.	1,0	2,0	0,1	1,1	4,0	1,1	5,2	0,1	2,5	4,2	0,2	0,1	9,0	0,1	8,1
Unigene0002444	731	731	G	C	SNP	.	864.32	1|1	1|1	0|0	1|1	0|1	0|0	1|1	0|1	0|0	0|0	0|1	0|0	0|1	0|1	1|1	1|1	0|0	0|0	0|1	0,4	0,3	4,0	0,1	1,1	3,0	0,1	1,2	3,0	2,0	5,1	1,0	2,5	1,3	0,2	0,2	7,0	1,0	8,1
Unigene0002448	728	728	A	T	SNP	.	2450.42	1|1	0|1	0|1	.|.	0|0	1|1	0|1	1|1	0|1	1|1	1|1	0|0	1|1	1|1	0|1	1|1	1|1	0|1	1|1	0,10	9,13	4,2	.,.	2,0	0,1	2,2	0,10	7,1	0,8	0,1	5,0	0,1	0,2	2,2	0,2	0,3	2,3	0,9
Unigene0002455	799	799	A	C	SNP	.	10447.6	1|1	0|1	1|1	1|1	0|1	0|1	0|1	0|1	0|1	1|1	0|1	0|1	1|1	0|1	0|1	0|1	1|1	1|1	1|1	0,27	5,15	0,14	0,14	9,3	9,7	5,9	5,10	9,17	1,16	4,6	11,4	0,12	8,14	13,14	5,7	0,38	0,10	0,23
Unigene0002455	929	929	A	G	SNP	.	5287.89	0|1	0|1	1|1	0|1	1|1	0|1	1|1	0|1	0|1	0|1	0|1	1|1	0|1	0|1	0|1	1|1	0|1	1|1	0|1	3,7	2,20	0,5	3,14	0,5	5,4	0,11	8,3	2,9	2,5	2,4	0,1	1,7	4,8	1,12	0,6	3,12	0,4	1,8
Unigene0002455	944	944	A	C	SNP	.	5661	0|1	1|1	1|1	1|1	1|1	0|1	1|1	1|1	0|1	1|1	1|1	1|1	1|1	0|1	1|1	1|1	0|1	1|1	0|1	1,5	0,17	0,4	1,13	0,5	3,4	0,10	0,8	1,9	0,5	0,4	0,1	0,6	1,6	0,11	0,5	3,7	0,4	1,7
Unigene0002458	2417	2417	A	G	SNP	.	3625.22	0|1	0|1	1|1	1|1	1|1	1|1	0|1	0|0	0|1	0|1	1|1	1|1	1|1	1|1	0|1	0|1	1|1	0|1	1|1	2,2	2,1	0,7	0,8	0,5	0,3	1,9	1,0	1,11	2,3	0,15	0,5	0,1	0,12	6,6	1,3	0,2	1,1	0,5
Unigene0002470	51	51	G	A	SNP	.	559.45	1|1	0|1	.|.	0|0	1|1	0|0	0|1	1|1	1|1	.|.	1|1	.|.	0|0	.|.	0|0	1|1	.|.	.|.	1|1	0,1	1,2	.,.	2,0	0,1	2,0	4,3	0,1	0,1	.,.	0,1	.,.	1,0	.,.	1,0	0,1	.,.	.,.	0,6
Unigene0002470	290	290	A	G	SNP	.	319.06	.|.	1|1	1|1	0|0	.|.	1|1	1|1	.|.	0|0	1|1	.|.	.|.	0|0	.|.	.|.	1|1	1|1	0|0	.|.	.,.	0,2	0,2	1,0	.,.	0,1	0,1	.,.	4,0	0,1	.,.	.,.	2,0	.,.	.,.	0,1	0,1	1,0	.,.
Unigene0002470	707	707	G	A	SNP	.	2728.22	0|1	0|1	1|1	1|1	0|1	1|1	0|1	0|1	0|1	0|1	0|0	0|1	0|1	0|1	1|1	1|1	1|1	0|0	1|1	1,3	2,11	0,2	0,5	1,4	0,1	2,5	5,2	2,8	2,1	1,0	1,4	3,5	1,3	0,2	0,2	0,7	1,0	0,12
Unigene0002490	268	268	T	C	SNP	.	1368.52	1|1	0|0	.|.	.|.	.|.	1|1	0|1	1|1	.|.	.|.	.|.	.|.	1|1	.|.	.|.	0|0	1|1	1|1	1|1	0,8	12,0	.,.	.,.	.,.	0,6	2,3	0,6	.,.	.,.	.,.	.,.	0,1	.,.	.,.	3,0	0,3	0,1	0,4
Unigene0002490	272	272	A	T	SNP	.	1368.52	1|1	0|0	.|.	.|.	.|.	1|1	0|1	1|1	.|.	.|.	.|.	.|.	1|1	.|.	.|.	0|0	1|1	1|1	1|1	0,8	12,0	.,.	.,.	.,.	0,6	2,3	0,6	.,.	.,.	.,.	.,.	0,1	.,.	.,.	3,0	0,3	0,1	0,4
Unigene0002500	602	602	C	T	SNP	.	2451.12	1|1	1|1	1|1	1|1	.|.	1|1	1|1	1|1	0|1	0|1	1|1	1|1	1|1	1|1	1|1	.|.	0|1	0|0	0|1	0,12	0,2	0,2	0,4	.,.	0,4	0,2	0,12	17,2	17,6	0,1	0,3	.	0,8	0,2	.,.	11,2	7,0	17,3
Unigene0002500	711	711	G	A	SNP	.	415.95	.|.	.|.	.|.	.|.	.|.	1|1	1|1	0|0	1|1	1|1	1|1	.|.	.|.	.|.	.|.	.|.	0|1	1|1	1|1	.,.	.,.	.,.	.,.	.,.	0,1	0,1	6,0	0,2	0,1	0,2	.,.	.,.	.,.	.,.	.,.	0,0	0,3	0,2
Unigene0002508	325	325	A	T	SNP	.	4027.01	.|.	0|0	1|1	1|1	0|0	1|1	1|1	.|.	.|.	1|1	0|0	0|0	1|1	0|1	1|1	.|.	1|1	.|.	1|1	.,.	1,0	0,12	0,24	1,0	0,6	0,1	.,.	.,.	0,11	1,0	1,0	0,2	1,1	0,5	.,.	0,36	.,.	0,7
Unigene0002518	209	209	A	G	SNP	.	15023.1	1|1	0|1	1|1	1|1	0|1	0|1	0|1	1|1	0|1	1|1	0|1	0|1	0|1	0|1	0|1	1|1	0|1	1|1	0|1	0,25	41,33	0,26	0,56	8,10	2,10	8,24	0,17	6,23	0,43	6,12	4,11	4,12	23,32	10,25	0,20	5,14	0,15	9,22
Unigene0002525	200	200	C	T	SNP	.	6861.72	0|1	0|1	1|1	1|1	1|1	1|1	1|1	1|1	0|1	1|1	1|1	1|1	0|1	0|1	1|1	1|1	1|1	0|1	1|1	1,12	11,21	0,6	0,8	0,8	0,6	0,6	0,15	2,13	0,20	0,6	0,14	3,3	4,8	0,1	0,4	0,13	5,4	0,9
Unigene0002535	146	146	A	G	SNP	.	88206.1	1|1	0|1	1|1	0|1	0|1	1|1	0|1	1|1	1|1	0|1	0|1	0|1	0|1	0|1	0|1	0|1	1|1	0|1	1|1	0,14	102215	0,100	57169	29,45	0,177	68160	0,11	4139	59215	98151	17,55	37145	78159	72140	92140	0,112	45200	0,244
Unigene0002544	1616	1616	A	G	SNP	.	7025.99	1|1	0|1	1|1	1|1	1|1	1|1	1|1	1|1	0|1	1|1	1|1	1|1	0|1	1|1	0|1	0|1	1|1	0|1	1|1	0,6	13,13	0,8	0,30	0,4	0,12	0,13	0,1	2,6	0,11	0,2	0,6	8,7	0,29	12,22	3,5	0,2	1,1	0,7
Unigene0002547	789	789	G	A	SNP	.	1452.19	0|0	0|1	0|1	0|0	0|1	0|1	1|1	0|1	1|1	0|1	1|1	.|.	1|1	0|1	.|.	1|1	1|1	0|1	1|1	3,0	1,3	2,4	2,0	1,1	1,2	0,3	4,1	0,2	3,4	0,1	.,.	0,3	3,7	.,.	0,1	0,7	2,2	0,1
Unigene0002547	1295	1295	A	C	SNP	.	3038.77	1|1	0|1	1|1	1|1	1|1	0|1	1|1	1|1	0|1	1|1	1|1	.|.	0|1	1|1	1|1	0|1	1|1	0|1	0|0	0,2	3,12	0,9	0,7	0,5	2,1	0,12	0,1	5,2	0,4	0,8	.,.	1,5	0,19	0,3	1,1	0,3	2,1	3,0
Unigene0002553	210	210	C	G	SNP	.	8127.26	1|1	0|1	1|1	0|1	0|1	0|1	0|1	1|1	1|1	1|1	0|1	0|1	1|1	0|1	0|1	0|1	0|1	1|1	0|1	0,14	11,19	0,7	3,31	1,5	4,12	4,11	0,8	0,9	0,11	4,15	3,7	0,12	14,20	1,3	2,9	3,16	0,6	4,13
Unigene0002556	1055	1055	T	A	SNP	.	3209.88	1|1	0|0	0|1	0|1	0|1	0|1	1|1	1|1	0|1	0|1	0|1	0|1	1|1	0|1	1|1	0|1	0|1	1|1	0|1	0,8	7,0	2,1	8,6	2,3	6,1	0,6	0,8	6,6	6,5	10,3	2,2	0,3	9,12	0,4	1,4	2,4	0,6	4,5
Unigene0002556	1980	2042	CTGCAGCTATTTCTGATAATGCCCCAAGCCATTTGAGCCACCTTCCTATGTACCCAGGATCAA	-	Deletion	.	5718.4	1|1	0|1	0|1	0|1	0|1	0|1	1|1	1|1	0|1	0|1	0|1	0|1	1|1	0|1	1|1	0|1	0|1	1|1	0|1	0,10	12,11	8,8	16,11	6,2	7,6	0,6	0,10	1,10	5,6	4,2	5,1	0,2	5,14	0,19	1,9	7,13	0,3	3,7
Unigene0002556	2558	2558	A	G	SNP	.	5896.13	1|1	0|1	0|1	0|1	0|1	1|1	1|1	1|1	0|1	1|1	0|1	0|1	1|1	0|1	0|1	1|1	1|1	1|1	1|1	0,12	4,7	2,7	2,12	1,6	0,7	0,11	0,8	2,11	0,9	2,3	1,3	0,9	2,16	4,10	0,5	0,20	0,1	1,14
Unigene0002559	1043	1043	C	T	SNP	.	2720.14	0|1	1|1	1|1	1|1	0|1	1|1	1|1	0|1	0|1	1|1	1|1	0|1	0|1	0|1	0|1	.|.	0|1	0|1	0|1	5,9	0,6	0,3	0,10	1,2	0,2	0,5	2,1	2,1	0,1	0,2	2,4	1,1	3,6	3,7	.,.	4,21	2,1	2,6
Unigene0002559	1588	1588	C	T	SNP	.	1197.12	1|1	1|1	.|.	1|1	1|1	1|1	1|1	1|1	0|0	.|.	0|1	.|.	.|.	0|1	1|1	0|1	0|1	0|0	0|1	0,6	0,4	.,.	0,1	0,1	0,1	0,1	0,1	1,0	.,.	2,1	.,.	.,.	4,6	0,3	1,1	1,5	2,0	2,3
Unigene0002565	208	208	A	T	SNP	.	20974.5	1|1	0|1	1|1	1|1	1|1	1|1	0|1	1|1	0|1	1|1	1|1	1|1	0|1	1|1	0|1	0|1	0|1	1|1	0|1	0,31	17,54	0,28	0,45	0,27	0,17	17,20	0,30	16,34	0,36	0,30	0,28	22,21	0,55	5,16	18,14	19,20	0,21	12,31
Unigene0002565	617	618	TT	-	Deletion	.	3259.62	1|1	0|1	.|.	0|1	.|.	.|.	1|1	1|1	1|1	1|1	.|.	.|.	1|1	1|1	0|1	1|1	0|1	1|1	0|1	0,13	8,9	.,.	1,0	.,.	.,.	0,2	0,9	0,11	0,4	.,.	.,.	0,16	0,3	2,4	0,4	5,3	1,1	2,4
Unigene0002571	255	255	C	A	SNP	.	4936.41	1|1	1|1	0|1	0|1	0|1	0|1	0|1	1|1	0|1	0|1	1|1	0|1	1|1	0|1	0|1	0|1	1|1	0|1	1|1	0,1	2,29	1,2	7,11	17,4	4,5	6,30	0,2	7,8	14,29	0,10	6,2	0,6	14,3	2,1	18,7	0,3	9,3	0,2
Unigene0002571	1506	1506	C	T	SNP	.	1713.33	.|.	0|1	1|1	0|1	1|1	0|1	0|1	1|1	0|1	1|1	0|1	0|0	.|.	1|1	1|1	1|1	0|0	0|1	0|1	.,.	5,7	0,4	1,5	0,2	1,1	7,2	0,1	2,2	0,9	3,3	1,0	.,.	0,3	0,3	0,3	1,0	1,1	3,1
Unigene0002571	1668	1668	T	G	SNP	.	1755.23	.|.	0|1	1|1	0|1	0|1	0|1	1|1	1|1	0|1	0|0	1|1	.|.	0|1	0|1	0|0	0|1	1|1	1|1	1|1	.,.	3,7	0,5	7,2	2,1	3,1	0,5	0,6	2,1	10,0	0,4	.,.	1,4	1,1	2,0	4,3	0,1	0,1	0,3
Unigene0002579	212	212	A	G	SNP	.	1852.14	1|1	0|1	0|0	1|1	0|1	0|1	0|1	0|0	1|1	0|1	1|1	0|1	1|1	0|1	1|1	0|1	1|1	1|1	1|1	0,1	3,2	2,0	0,4	5,1	1,1	1,3	1,0	0,5	2,4	0,2	1,1	0,2	6,5	0,1	1,1	0,13	0,1	0,4
Unigene0002580	1638	1638	A	G	SNP	.	1166	0|0	0|1	0|1	1|1	1|1	0|1	1|1	.|.	0|1	.|.	0|1	1|1	1|1	0|1	.|.	.|.	0|1	1|1	0|1	5,0	3,3	3,3	0,2	0,2	1,2	0,4	.,.	2,4	.,.	2,2	0,4	0,1	3,1	.,.	.,.	1,4	0,1	2,1
Unigene0002581	881	881	A	G	SNP	.	17007.6	1|1	1|1	1|1	0|1	1|1	1|1	0|1	.|.	0|1	.|.	1|1	1|1	0|1	0|1	1|1	0|1	1|1	.|.	1|1	0,23	0,26	0,18	60,74	0,2	0,38	4,9	.,.	45,18	.,.	0,15	0,2	7,7	96,40	0,9	11,2	0,47	.,.	0,87
Unigene0002581	967	967	A	C	SNP	.	35607.7	1|1	1|1	1|1	0|1	0|1	1|1	0|1	1|1	1|1	1|1	1|1	0|1	1|1	0|1	1|1	0|1	1|1	1|1	1|1	0,75	0,51	1,32	52109	1,6	0,48	4,18	0,5	0,83	0,4	0,13	2,5	0,25	67118	0,13	5,20	0,95	0,2	0,171
Unigene0002583	153	153	C	T	SNP	.	3282.82	0|1	0|1	1|1	0|1	1|1	0|1	1|1	0|0	0|0	1|1	0|1	1|1	0|1	0|1	0|1	1|1	0|1	0|1	0|1	7,4	35,5	1,5	15,10	0,1	23,4	0,6	6,0	3,0	0,8	11,10	0,2	3,2	18,12	6,6	0,7	15,4	3,1	12,4
Unigene0002587	202	202	T	G	SNP	.	2424.17	1|1	0|1	0|0	0|1	1|1	0|1	0|1	0|1	0|1	1|1	0|1	0|0	1|1	1|1	0|0	0|1	0|1	1|1	0|1	0,1	3,6	3,0	5,5	0,1	3,4	1,4	6,12	2,2	0,2	4,8	3,0	0,5	1,5	3,0	2,2	5,3	0,1	9,1
Unigene0002597	3551	3551	G	-	Deletion	.	6774.21	1|1	0|1	0|1	0|1	0|1	0|1	0|1	1|1	0|1	0|1	1|1	0|1	0|1	0|1	.|.	1|1	1|1	0|1	1|1	0,17	24,16	10,10	9,8	13,1	11,7	16,4	0,36	2,14	6,3	1,12	10,1	3,10	10,7	.,.	0,3	0,19	5,14	0,25
Unigene0002599	217	217	C	T	SNP	.	769.97	0|0	0|1	.|.	0|1	1|1	1|1	0|1	0|1	0|1	1|1	0|0	0|1	0|0	0|0	1|1	1|1	.|.	.|.	1|1	1,0	3,1	.,.	1,1	0,7	0,2	1,1	7,1	4,1	0,2	1,0	1,2	2,0	1,0	0,1	0,1	.,.	.,.	0,3
Unigene0002599	220	220	A	G	SNP	.	903.12	0|0	0|0	.|.	0|1	1|1	1|1	0|1	0|1	0|1	1|1	0|0	0|1	0|0	0|0	1|1	1|1	.|.	.|.	1|1	1,0	3,0	.,.	1,1	0,7	0,1	1,1	6,1	2,3	0,2	1,0	1,2	2,0	1,0	0,1	0,1	.,.	.,.	0,3
Unigene0002613	261	261	A	-	Deletion	.	2830.17	1|1	0|1	1|1	0|1	1|1	0|1	1|1	.|.	1|1	0|1	0|1	1|1	0|1	1|1	1|1	0|1	0|1	1|1	1|1	0,1	2,16	0,2	2,3	0,1	1,2	0,5	.,.	0,8	5,1	1,2	0,1	2,3	0,10	0,5	1,2	1,11	0,1	1,12
Unigene0002616	316	316	C	T	SNP	.	768.11	1|1	0|0	.|.	0|0	0|1	1|1	0|1	1|1	0|1	0|1	1|1	1|1	0|0	0|1	0|0	0|1	1|1	.|.	1|1	0,1	1,0	.,.	2,0	1,2	0,2	9,3	0,2	2,1	3,1	0,3	0,1	15,0	19,3	11,1	1,2	0,1	.,.	0,3
Unigene0002621	569	569	A	G	SNP	.	2725.53	0|1	0|1	1|1	0|1	1|1	1|1	1|1	0|1	1|1	0|1	.|.	0|1	1|1	0|1	1|1	1|1	0|1	0|1	0|1	4,4	1,3	0,5	1,9	0,1	0,7	0,2	1,1	0,5	1,4	.,.	1,2	0,3	1,9	0,5	0,4	2,3	1,1	3,5
Unigene0002623	1474	1474	A	G	SNP	.	1880.03	1|1	1|1	1|1	0|1	0|1	1|1	1|1	1|1	0|1	1|1	0|1	0|1	0|1	0|1	0|0	0|0	0|1	.|.	1|1	0,5	0,9	0,1	2,2	2,3	0,4	0,4	0,7	9,2	0,3	1,1	5,1	3,1	5,4	3,0	1,0	1,5	.,.	0,1
Unigene0002623	1544	1544	G	C	SNP	.	4006.45	1|1	1|1	1|1	0|1	0|1	1|1	1|1	1|1	0|1	1|1	0|1	0|1	0|1	0|1	0|0	0|1	0|1	.|.	.|.	0,18	0,18	0,5	3,8	2,4	0,4	0,4	0,10	13,3	0,6	2,6	3,2	4,2	4,9	3,0	3,1	2,9	.,.	.,.
Unigene0002623	1643	1643	G	C	SNP	.	3020.95	1|1	1|1	1|1	0|1	0|1	0|1	0|1	1|1	0|1	1|1	0|1	0|1	0|0	1|1	0|1	0|1	0|1	.|.	.|.	0,9	0,3	0,7	2,8	1,1	2,1	1,8	0,12	1,5	0,4	2,5	2,3	3,0	0,5	1,1	2,2	4,6	.,.	.,.
Unigene0002625	494	494	A	T	SNP	.	2914.56	1|1	0|1	0|0	0|0	0|1	1|1	0|1	1|1	1|1	0|0	0|1	0|1	1|1	0|1	0|1	0|0	1|1	0|0	1|1	0,1	5,17	7,0	5,0	8,5	0,1	13,2	0,1	1,14	8,0	10,12	9,4	0,17	2,9	2,2	18,0	0,2	1,0	0,1
Unigene0002625	748	748	A	T	SNP	.	2295.62	1|1	0|1	0|1	0|1	0|1	1|1	0|1	1|1	0|1	1|1	1|1	0|1	.|.	1|1	.|.	0|1	1|1	0|0	1|1	0,2	7,6	10,2	4,2	1,7	0,1	10,7	0,4	8,4	0,7	0,8	3,4	.,.	0,3	.,.	8,5	0,2	2,0	0,1
Unigene0002625	1829	1829	C	A	SNP	.	2836.11	0|1	0|1	1|1	1|1	0|1	0|0	1|1	1|1	0|1	1|1	0|1	0|1	0|1	0|1	0|1	1|1	0|0	1|1	0|0	1,2	3,12	0,2	0,1	2,3	2,0	0,10	0,2	6,7	0,8	1,5	2,2	2,2	1,3	1,4	0,10	3,0	1,4	1,0
Unigene0002625	2862	2862	T	A	SNP	.	827.25	.|.	0|1	1|1	.|.	.|.	0|0	1|1	1|1	0|1	1|1	0|0	1|1	0|0	1|1	0|1	1|1	1|1	1|1	.|.	.,.	1,4	0,1	.,.	.,.	3,0	0,1	0,1	6,2	0,6	11,0	0,1	9,0	0,1	6,3	0,1	0,1	0,1	.,.
Unigene0002625	2865	2865	C	-	Deletion	.	818.2	.|.	0|1	1|1	.|.	.|.	0|0	1|1	1|1	0|1	1|1	0|0	1|1	0|0	1|1	0|1	1|1	1|1	1|1	.|.	.,.	1,3	0,1	.,.	.,.	3,0	0,1	0,1	6,2	0,4	11,0	.	9,0	.	6,3	0,1	.	0,1	.,.
Unigene0002635	181	181	A	C	SNP	.	2360.44	0|0	0|1	0|1	1|1	1|1	0|1	0|0	0|1	1|1	1|1	0|1	1|1	0|0	0|1	0|1	0|1	0|1	1|1	0|1	1,0	16,14	1,2	0,3	0,2	1,4	14,1	7,7	0,5	0,2	3,7	0,3	1,0	18,7	1,3	7,4	1,3	0,3	1,2
Unigene0002636	198	198	A	G	SNP	.	3135.99	.|.	0|1	0|0	0|0	0|0	.|.	0|1	0|1	1|1	1|1	1|1	0|0	1|1	1|1	1|1	0|1	0|0	1|1	0|0	.,.	16,4	2,0	6,0	3,0	.,.	14,7	4,2	0,10	0,12	0,8	6,0	0,8	0,18	0,5	10,10	4,0	0,2	10,0
Unigene0002639	1434	1434	T	C	SNP	.	1307.67	0|1	1|1	1|1	0|1	0|1	0|1	1|1	1|1	0|1	1|1	0|1	0|0	0|0	0|1	0|0	0|1	0|1	1|1	.|.	2,6	0,11	0,3	8,1	2,2	3,4	0,1	0,5	10,1	0,1	2,1	1,0	7,0	10,1	1,0	2,1	6,5	0,1	.,.
Unigene0002657	174	174	A	-	Deletion	.	3883.82	1|1	0|1	0|1	0|1	0|1	0|1	0|1	0|1	1|1	1|1	0|1	1|1	1|1	1|1	0|1	1|1	1|1	1|1	0|1	0,3	3,19	1,2	6,13	2,11	2,2	1,7	4,1	0,7	1,14	3,7	0,1	0,5	0,11	7,10	0,8	0,3	0,1	3,7
Unigene0002677	1172	1172	A	G	SNP	.	1473.55	1|1	0|1	.|.	1|1	0|0	1|1	0|1	1|1	0|0	1|1	1|1	0|0	.|.	0|0	0|1	0|0	.|.	0|1	1|1	0,2	1,10	.,.	0,1	1,0	0,2	7,7	0,1	1,0	1,15	1,4	1,0	.,.	2,0	2,1	3,0	.,.	4,2	0,1
Unigene0002679	423	423	A	C	SNP	.	3955.54	1|1	0|1	0|1	0|1	0|1	1|1	0|1	1|1	1|1	0|0	1|1	0|1	1|1	0|1	0|1	1|1	1|1	0|1	1|1	0,5	2,15	5,1	1,12	1,2	0,2	2,4	0,3	0,8	3,0	0,6	4,3	0,6	4,2	9,6	0,1	0,8	1,2	0,5
Unigene0002679	494	494	C	T	SNP	.	4123.78	1|1	0|1	0|1	1|1	0|1	1|1	0|1	1|1	1|1	0|1	1|1	0|1	1|1	0|1	0|1	1|1	0|1	0|1	1|1	0,8	2,15	4,1	1,21	1,4	0,3	1,7	0,1	0,6	7,2	0,5	1,3	0,7	4,7	5,8	0,2	1,7	1,3	0,8
Unigene0002696	2173	2173	C	T	SNP	.	3412.49	1|1	0|1	0|1	1|1	0|1	1|1	0|1	1|1	0|1	.|.	1|1	0|1	0|1	1|1	0|1	0|0	0|1	1|1	0|1	0,27	2,4	6,3	0,3	2,9	0,5	1,1	0,11	4,4	.,.	0,4	4,2	3,2	0,10	4,1	2,0	5,4	0,2	3,2
Unigene0002698	882	882	A	C	SNP	.	7159.37	1|1	0|1	0|1	0|1	1|1	1|1	0|1	1|1	0|1	1|1	1|1	1|1	1|1	0|0	0|1	0|1	0|1	1|1	0|1	0,46	20,16	1,6	31,9	0,5	0,6	5,6	0,12	8,23	0,9	0,7	0,2	0,8	53,4	17,18	14,4	27,8	0,6	10,9
Unigene0002698	912	912	T	G	SNP	.	6182.67	1|1	0|1	0|1	0|1	1|1	1|1	0|1	1|1	0|1	1|1	1|1	1|1	1|1	0|0	0|1	0|1	0|1	1|1	0|1	0,41	22,5	1,2	36,4	0,4	0,5	5,6	0,13	6,20	0,3	0,5	0,2	0,9	53,2	21,12	14,6	37,11	0,4	11,8
Unigene0002698	937	937	T	C	SNP	.	6692.25	1|1	0|1	0|1	0|1	1|1	1|1	0|1	1|1	0|1	1|1	1|1	1|1	1|1	0|0	0|1	0|1	0|1	1|1	0|1	0,39	16,7	1,2	32,4	0,4	0,5	4,8	0,20	5,27	0,2	0,6	0,4	0,13	60,1	18,9	15,4	39,8	0,5	16,6
Unigene0002698	1099	1099	A	T	SNP	.	1989.34	0|1	0|1	.|.	0|0	1|1	1|1	0|1	0|1	0|1	1|1	1|1	1|1	.|.	0|0	0|1	0|0	0|1	1|1	0|1	5,8	10,8	.,.	22,0	0,1	0,4	2,2	1,5	6,13	0,2	0,1	0,1	.,.	60,2	8,5	13,1	26,4	0,2	11,2
Unigene0002698	1115	1115	T	C	SNP	.	811.13	1|1	0|1	.|.	0|0	.|.	1|1	0|1	1|1	0|1	1|1	1|1	.|.	.|.	0|0	0|1	0|0	0|0	1|1	0|1	0,4	9,2	.,.	25,0	.,.	0,1	3,1	0,1	8,6	0,2	0,1	.,.	.,.	61,2	12,2	14,0	29,1	0,1	10,1
Unigene0002698	1529	1529	C	T	SNP	.	709.4	1|1	0|1	1|1	0|0	.|.	.|.	0|0	1|1	0|1	1|1	1|1	.|.	1|1	0|0	0|0	0|0	0|0	.|.	0|1	0,10	13,2	0,1	46,0	.,.	.,.	2,0	0,1	10,2	0,1	0,1	.,.	0,1	67,0	7,0	10,0	31,1	.,.	13,3
Unigene0002698	1592	1592	G	T	SNP	.	871.93	0|1	0|0	0|0	0|0	1|1	1|1	0|0	1|1	0|1	.|.	1|1	.|.	1|1	0|0	0|0	0|0	0|1	1|1	0|1	2,2	14,1	1,0	40,0	0,1	0,5	9,0	0,1	10,3	.,.	0,1	.,.	0,1	75,0	7,0	12,0	32,11	0,1	17,5
Unigene0002698	1795	1795	C	T	SNP	.	1801.95	1|1	0|1	1|1	0|0	.|.	1|1	0|0	1|1	0|1	1|1	.|.	.|.	1|1	0|0	0|1	.|.	0|1	1|1	0|1	0,9	4,2	0,1	17,0	.,.	0,3	3,0	0,4	1,5	0,3	.,.	.,.	0,1	29,0	4,3	.,.	10,6	0,1	3,9
Unigene0002703	1470	1470	T	C	SNP	.	10937.1	1|1	0|1	0|1	0|1	0|1	0|1	1|1	1|1	0|1	0|1	0|1	0|1	0|1	0|1	0|1	1|1	1|1	0|1	1|1	0,25	21,15	5,12	6,24	11,10	3,7	0,24	0,13	9,18	11,22	3,17	3,7	10,11	7,18	3,12	0,10	0,29	2,10	0,31
Unigene0002713	1885	1885	A	C	SNP	.	8429.22	0|1	0|1	0|1	0|1	0|1	0|1	0|1	0|1	0|1	1|1	1|1	0|1	1|1	1|1	1|1	0|1	0|1	1|1	1|1	3,15	2,23	5,6	5,18	1,6	2,7	4,19	3,17	5,10	0,7	1,4	1,6	0,8	0,17	0,8	1,6	8,14	0,5	0,14
Unigene0002723	1765	1765	G	A	SNP	.	554.01	1|1	0|1	1|1	0|1	0|0	.|.	.|.	.|.	1|1	.|.	.|.	0|1	1|1	1|1	0|1	1|1	0|1	.|.	0|0	0,3	2,1	0,2	3,2	1,0	.,.	.,.	.,.	0,1	.,.	.,.	2,2	0,1	0,1	6,1	0,1	7,2	.,.	4,0
Unigene0002726	277	277	A	C	SNP	.	31740.7	0|1	0|1	0|1	0|1	0|1	0|1	0|1	0|1	1|1	1|1	0|1	0|1	1|1	0|1	0|1	0|1	1|1	1|1	1|1	71,35	79,33	18,28	5,50	38,8	3,26	57,65	26,39	2,62	0,51	26,53	31,10	0,55	18,58	30,76	17,53	4,64	0,20	1,53
Unigene0002729	236	236	A	G	SNP	.	752.3	1|1	.|.	1|1	0|1	1|1	0|0	1|1	1|1	0|0	0|1	0|1	1|1	1|1	1|1	0|1	1|1	0|0	0|0	0|0	0,1	.,.	0,1	1,2	0,2	2,0	0,3	0,1	4,0	1,3	1,1	0,2	0,1	0,2	5,1	0,5	4,0	2,0	1,0
Unigene0002734	944	944	A	T	SNP	.	15315.4	1|1	1|1	1|1	0|1	0|1	0|1	0|1	0|1	0|1	0|1	1|1	0|1	0|1	0|1	0|1	1|1	0|1	1|1	0|1	2,33	0,26	0,17	4,46	3,14	6,10	3,28	8,17	12,15	4,11	0,21	3,14	3,16	8,49	7,19	2,21	6,36	0,5	4,15
Unigene0002734	1089	1089	A	G	SNP	.	34242.2	1|1	1|1	1|1	1|1	0|1	0|1	0|1	0|1	0|1	0|1	1|1	0|1	0|1	0|1	0|1	0|1	0|1	1|1	0|1	4,96	0,104	0,38	3,65	8,37	10,28	9,53	19,40	35,75	10,54	0,42	6,28	6,35	6,73	9,51	7,33	31,91	0,22	12,42
Unigene0002734	1101	1101	A	G	SNP	.	40493.5	1|1	1|1	1|1	1|1	0|1	0|1	0|1	1|1	1|1	0|1	1|1	0|1	0|1	1|1	1|1	1|1	0|1	1|1	0|1	0,87	0,93	0,36	0,60	7,31	6,26	9,41	0,54	1100	9,48	0,36	5,24	6,32	0,67	0,54	2,34	32,79	0,19	12,37
Unigene0002735	140	140	T	C	SNP	.	2054.99	0|1	0|0	1|1	0|1	1|1	0|1	0|0	0|1	1|1	0|1	1|1	1|1	1|1	1|1	0|1	0|0	0|1	0|1	1|1	1,3	2,0	0,2	2,3	0,2	1,1	3,0	2,3	0,2	2,4	0,3	0,4	0,1	0,9	5,4	2,0	5,7	1,2	0,1
Unigene0002735	146	146	A	C	SNP	.	1618.02	0|0	0|1	1|1	0|1	1|1	0|1	0|0	0|0	1|1	0|1	1|1	1|1	1|1	0|1	0|1	0|0	0|1	0|1	1|1	4,0	2,1	0,2	1,3	0,2	1,1	3,0	5,0	0,2	2,4	0,4	0,4	0,1	1,8	6,4	3,0	4,7	2,2	0,1
Unigene0002735	1634	1634	A	G	SNP	.	2014.25	1|1	0|1	0|1	1|1	.|.	0|1	1|1	1|1	0|1	0|1	.|.	0|1	0|1	1|1	0|1	1|1	0|0	0|1	0|1	0,2	13,4	3,1	0,4	.,.	3,3	0,7	0,4	5,3	2,7	.,.	3,3	3,1	0,8	4,4	0,2	6,0	1,1	5,4
Unigene0002735	1651	1651	C	G	SNP	.	1915.69	1|1	0|1	0|0	1|1	1|1	0|1	1|1	1|1	0|1	0|1	1|1	0|1	0|1	1|1	0|1	1|1	0|0	0|1	0|1	0,2	13,3	3,0	0,6	0,1	3,4	0,4	0,4	7,3	4,4	0,1	2,3	3,1	0,11	4,3	0,1	7,0	1,1	7,3
Unigene0002735	1712	1712	A	G	SNP	.	3844.61	0|0	1|1	1|1	0|1	0|0	0|1	1|1	0|1	1|1	0|0	0|1	0|1	1|1	0|1	1|1	1|1	1|1	1|1	1|1	6,0	0,15	0,4	14,3	1,0	7,3	0,4	3,3	0,12	3,0	3,1	1,2	0,8	8,1	0,13	0,1	0,8	0,2	0,14
Unigene0002753	208	208	G	T	SNP	.	39911.9	1|1	1|1	1|1	1|1	0|1	1|1	1|1	1|1	0|1	1|1	1|1	0|1	1|1	0|1	1|1	1|1	0|1	1|1	0|1	0,43	0,72	0,32	0,79	14,29	0,66	0,127	1,44	11,66	0,10	0,34	14,43	0,40	30,72	0,81	0,84	12,38	0,68	7,26
Unigene0002767	2049	2049	C	T	SNP	.	1326.84	0|1	1|1	0|1	1|1	1|1	.|.	0|0	0|1	0|0	1|1	0|0	.|.	.|.	0|1	1|1	1|1	0|0	0|1	0|0	5,3	0,3	1,2	0,2	0,1	.,.	4,0	2,2	1,0	0,10	1,0	.,.	.,.	2,2	0,6	0,4	1,0	1,1	6,0
Unigene0002770	952	952	T	A	SNP	.	28019.1	0|1	0|1	0|1	1|1	1|1	0|1	0|1	1|1	0|1	0|1	0|1	1|1	1|1	0|1	0|1	0|1	0|1	0|1	1|1	19,81	40,63	10,33	0,60	4,32	6,27	12,27	4,52	14,67	11,39	30,32	1,17	0,32	23,61	13,37	13,15	9,74	8,13	6,85
Unigene0002774	442	442	C	T	SNP	.	835.75	1|1	.|.	0|1	1|1	0|0	1|1	0|1	1|1	1|1	0|1	1|1	.|.	1|1	0|0	.|.	0|0	1|1	.|.	0|1	0,2	.,.	3,2	0,2	4,0	0,1	1,3	0,5	0,1	1,2	0,2	.,.	0,2	3,0	.,.	2,0	.	.,.	2,0
Unigene0002774	488	488	C	T	SNP	.	547.14	0|1	1|1	0|1	1|1	0|0	1|1	0|1	0|0	1|1	0|0	1|1	1|1	0|1	0|0	.|.	0|0	1|1	.|.	0|0	2,1	0,2	4,2	0,2	3,0	0,2	2,2	7,0	0,1	1,0	0,2	0,1	2,1	2,0	.,.	3,0	0,1	.,.	2,0
Unigene0002793	366	366	C	G	SNP	.	3033.86	0|0	0|1	1|1	0|0	1|1	1|1	0|1	0|0	0|1	1|1	1|1	0|1	0|1	0|1	0|1	0|1	1|1	0|1	1|1	2,0	2,16	0,3	4,0	0,1	0,3	3,1	1,0	3,13	0,2	0,2	2,1	1,7	1,4	3,9	1,5	0,4	1,2	0,2
Unigene0002793	368	368	A	T	SNP	.	3033.86	0|0	0|1	1|1	0|0	1|1	1|1	0|1	0|0	0|1	1|1	1|1	0|1	0|1	0|1	0|1	0|1	1|1	0|1	1|1	2,0	2,16	0,3	4,0	0,1	0,3	3,0	1,0	3,13	0,2	0,2	2,1	1,6	1,4	3,9	1,5	0,4	1,2	0,2
Unigene0002797	448	448	C	T	SNP	.	172402	1|1	0|1	1|1	0|1	0|1	0|1	0|1	1|1	1|1	1|1	1|1	0|1	1|1	1|1	1|1	1|1	1|1	1|1	1|1	0,287	99315	1193	35283	37122	63160	27254	0,175	1189	11264	0,290	44184	19228	0,317	0,322	0,188	1250	0,178	0,336
Unigene0002802	300	300	G	A	SNP	.	1801.79	0|0	0|1	1|1	1|1	.|.	0|0	0|1	0|1	0|0	0|0	0|0	.|.	1|1	1|1	0|1	1|1	1|1	0|0	1|1	7,0	4,3	0,6	0,5	.,.	3,0	8,4	10,2	1,0	3,0	9,0	.,.	0,7	0,9	1,12	0,2	0,2	1,0	0,1
Unigene0002802	315	315	A	G	SNP	.	3195.92	0|0	1|1	0|0	1|1	1|1	1|1	0|1	0|1	1|1	0|1	0|1	1|1	1|1	0|1	0|1	0|1	1|1	0|1	1|1	10,0	0,9	7,0	0,10	0,3	0,5	12,2	15,2	0,4	4,1	9,2	0,1	0,7	10,5	5,13	1,2	0,7	1,1	0,2
Unigene0002802	327	327	A	G	SNP	.	4118.81	0|0	1|1	0|1	1|1	1|1	1|1	0|1	0|1	1|1	0|1	0|1	1|1	1|1	0|1	0|1	0|1	1|1	0|1	1|1	11,0	0,12	5,2	0,12	0,5	0,9	9,3	15,4	0,7	5,2	7,2	0,6	0,4	7,12	4,11	2,4	0,6	1,1	0,2
Unigene0002803	342	342	A	T	SNP	.	1514.59	1|1	0|1	1|1	0|1	0|0	0|0	1|1	0|1	0|1	1|1	1|1	0|1	0|1	0|1	.|.	0|1	1|1	1|1	1|1	0,1	10,2	0,3	5,2	3,0	3,0	0,8	2,2	1,6	0,3	1,3	3,1	2,1	4,5	.,.	1,3	0,4	0,1	0,1
Unigene0002803	360	360	G	T	SNP	.	1901.03	1|1	0|1	1|1	0|1	0|0	0|1	1|1	0|1	0|1	1|1	0|1	0|0	0|1	0|1	.|.	0|1	1|1	1|1	1|1	0,2	9,3	0,4	5,3	3,0	1,2	0,9	2,4	1,6	0,3	1,3	3,0	3,2	3,3	.,.	1,4	0,3	0,1	0,2
Unigene0002803	1814	1814	T	A	SNP	.	1883.59	1|1	0|1	1|1	0|0	0|1	0|1	0|1	1|1	0|1	0|1	0|0	0|1	1|1	0|1	0|1	1|1	1|1	1|1	.|.	0,2	6,12	0,1	3,0	7,1	1,1	4,2	0,2	2,3	3,3	2,0	3,1	0,3	7,4	1,3	0,3	0,2	0,6	.,.
Unigene0002805	635	635	A	G	SNP	.	3806.24	1|1	0|1	0|1	0|1	0|1	0|1	1|1	1|1	1|1	0|1	0|1	0|1	0|1	0|1	0|1	1|1	1|1	0|0	0|1	0,4	2,3	2,5	1,2	6,2	1,3	0,5	0,7	0,7	3,18	5,9	1,3	1,1	1,9	1,3	0,2	0,6	1,0	2,7
Unigene0002805	1495	1495	C	T	SNP	.	4130.2	0|1	0|1	1|1	1|1	0|1	0|1	1|1	0|0	1|1	1|1	0|1	0|1	0|1	0|1	0|1	1|1	0|1	0|0	0|1	4,12	5,9	0,6	0,3	4,10	2,3	0,9	7,0	0,19	0,4	1,8	1,3	1,4	5,13	5,2	0,1	1,9	2,0	3,5
Unigene0002812	207	207	A	G	SNP	.	5552.66	1|1	0|1	0|1	0|1	1|1	0|1	1|1	1|1	0|1	0|1	0|1	1|1	0|1	1|1	0|1	0|1	0|1	.|.	0|0	0,24	3,5	3,4	2,18	0,8	2,5	0,7	0,6	1,6	3,10	1,3	0,5	2,4	0,20	3,19	3,1	4,2	.,.	1,0
Unigene0002816	528	528	A	G	SNP	.	1007.45	1|1	1|1	0|1	0|0	1|1	1|1	0|1	.|.	0|1	0|0	1|1	0|1	0|1	0|1	.|.	0|1	1|1	.|.	0|1	0,1	0,4	1,3	2,0	0,3	0,2	5,2	.,.	9,1	4,0	0,2	1,1	2,1	2,2	.,.	3,1	0,1	.,.	2,4
Unigene0002820	2012	2012	T	C	SNP	.	2018.8	0|1	0|1	1|1	0|1	1|1	0|1	0|1	0|1	0|1	1|1	1|1	1|1	0|1	1|1	.|.	0|1	0|1	0|0	0|1	4,3	2,2	0,4	3,4	0,1	4,7	7,4	4,3	6,5	0,5	0,2	0,3	3,1	0,7	.,.	3,2	8,2	3,0	13,4
Unigene0002820	2153	2153	A	G	SNP	.	707.45	0|0	0|1	1|1	0|1	.|.	1|1	0|1	0|0	0|1	1|1	1|1	.|.	0|0	1|1	1|1	0|0	0|1	0|1	0|1	3,0	1,1	0,1	2,1	.,.	0,1	4,2	3,0	3,2	0,1	0,2	.,.	3,0	0,5	0,1	1,0	3,2	4,1	2,3
Unigene0002820	2167	2167	A	T	SNP	.	1127.94	0|0	0|1	1|1	0|1	1|1	1|1	0|1	0|0	0|1	1|1	1|1	1|1	0|1	1|1	1|1	0|0	0|0	0|1	0|1	3,0	2,5	0,2	2,3	0,1	0,1	5,2	3,0	7,1	0,1	0,2	0,3	3,2	0,9	0,1	2,0	6,0	4,1	6,2
Unigene0002825	269	269	C	T	SNP	.	4969.49	0|0	1|1	1|1	0|1	0|0	0|1	1|1	0|1	1|1	0|0	1|1	1|1	0|1	0|1	.|.	0|1	0|1	0|1	0|1	10,0	0,23	0,3	3,9	1,0	1,9	2,15	1,5	1,18	3,0	0,15	0,1	3,9	7,17	.,.	6,8	6,4	8,3	6,3
Unigene0002825	1414	1414	C	A	SNP	.	6277.1	0|1	0|1	1|1	0|1	1|1	1|1	0|1	0|1	1|1	1|1	1|1	0|1	0|1	0|1	1|1	1|1	0|1	0|1	1|1	6,1	2,2	0,16	1,4	0,6	0,7	1,2	4,10	0,15	0,3	0,2	1,9	1,12	2,8	0,12	0,1	3,24	1,3	0,16
Unigene0002825	1580	1580	T	C	SNP	.	996.88	0|1	1|1	1|1	1|1	0|0	0|0	1|1	0|1	0|1	.|.	1|1	0|1	1|1	0|1	0|0	.|.	.|.	1|1	1|1	3,2	0,2	0,1	0,2	3,0	1,0	0,2	10,3	2,1	.,.	0,1	1,2	0,1	3,6	3,0	.,.	.,.	0,2	0,1
Unigene0002825	1582	1582	G	A	SNP	.	996.88	0|1	1|1	1|1	1|1	0|0	0|0	1|1	0|1	0|1	.|.	1|1	0|1	1|1	0|1	0|0	.|.	.|.	1|1	1|1	3,2	0,1	0,1	0,2	3,0	1,0	0,2	9,3	2,1	.,.	0,1	1,2	0,1	3,6	3,0	.,.	.,.	0,2	0,1
Unigene0002825	1688	1688	T	A	SNP	.	1922.99	1|1	1|1	.|.	1|1	0|1	0|0	1|1	0|1	0|1	.|.	.|.	0|0	1|1	0|1	0|0	1|1	1|1	1|1	1|1	0,3	0,3	.,.	0,2	2,3	3,0	0,2	11,8	1,3	.,.	.,.	1,0	0,4	2,7	1,0	0,2	0,3	0,5	0,2
Unigene0002825	1707	1707	C	A	SNP	.	2423.02	1|1	1|1	.|.	1|1	0|1	0|0	1|1	0|1	0|1	.|.	.|.	0|0	1|1	0|1	0|0	1|1	1|1	1|1	1|1	0,4	0,3	.,.	0,3	2,2	3,0	0,3	8,12	1,5	.,.	.,.	1,0	0,5	2,8	1,0	0,3	0,5	0,4	0,2
Unigene0002828	134	134	A	G	SNP	.	1253.72	0|0	0|0	0|1	0|1	0|1	1|1	0|1	.|.	1|1	0|0	0|0	0|1	1|1	1|1	0|0	1|1	0|1	.|.	1|1	.	6,0	0,1	1,5	3,2	0,5	1,3	.,.	0,2	3,0	1,0	1,1	0,2	0,7	.	0,1	0,3	.,.	0,1
Unigene0002830	1198	1198	C	T	SNP	.	1439.32	1|1	0|1	0|0	1|1	0|1	0|0	0|1	1|1	0|1	0|1	0|1	1|1	1|1	0|1	0|1	1|1	0|1	.|.	1|1	0,3	4,2	9,0	0,6	2,1	5,0	4,2	0,1	4,2	3,3	3,1	0,1	0,5	5,2	2,3	0,1	5,3	.,.	0,3
Unigene0002830	1202	1202	T	G	SNP	.	1153.49	1|1	0|1	0|0	1|1	0|1	0|0	0|1	1|1	0|0	0|1	0|1	1|1	1|1	0|1	0|1	1|1	0|1	.|.	1|1	0,2	3,2	8,0	0,5	2,1	5,0	4,2	.	4,0	2,1	2,1	0,1	0,4	5,1	2,2	0,1	5,2	.,.	0,2
Unigene0002832	769	769	A	T	SNP	.	12941.4	0|1	1|1	1|1	1|1	1|1	0|1	1|1	1|1	0|1	0|1	1|1	1|1	0|1	1|1	0|1	0|1	0|1	0|1	0|1	3,11	3,49	0,9	0,35	0,8	5,6	0,29	0,12	10,18	1,11	0,27	0,10	4,10	0,52	2,18	2,7	3,15	2,5	5,15
Unigene0002833	716	716	T	C	SNP	.	8257.31	1|1	1|1	0|1	0|1	0|1	1|1	0|1	1|1	0|1	1|1	1|1	0|1	0|1	0|1	1|1	1|1	1|1	1|1	1|1	0,3	0,17	5,19	4,3	4,13	0,3	4,16	0,1	1,13	0,7	0,19	3,5	2,16	5,15	0,5	0,20	0,41	0,3	0,10
Unigene0002835	435	435	G	A	SNP	.	1967.17	1|1	1|1	0|0	0|1	0|1	0|1	0|1	0|1	1|1	0|0	1|1	1|1	0|0	1|1	0|1	1|1	1|1	0|1	1|1	0,3	0,5	1,0	2,8	1,4	1,3	1,3	4,3	0,4	1,0	0,2	0,2	2,0	0,4	1,4	0,3	0,3	2,1	0,2
Unigene0002837	1207	1207	G	C	SNP	.	15239.9	0|1	1|1	1|1	0|1	1|1	0|1	1|1	0|1	1|1	0|1	0|1	1|1	1|1	0|1	0|1	0|1	1|1	1|1	1|1	33,16	0,37	0,19	7,27	0,20	2,13	0,24	19,4	0,22	10,30	4,17	0,23	0,16	12,31	7,35	1,13	0,29	0,6	0,28
Unigene0002838	3806	3806	G	T	SNP	.	18965	0|1	0|1	0|1	0|1	0|1	1|1	1|1	1|1	0|1	0|1	0|1	1|1	1|1	0|1	1|1	1|1	1|1	0|1	1|1	5,10	17,39	3,30	3,36	5,22	0,24	1,42	0,30	5,43	7,5	4,19	0,10	0,40	7,41	0,1	0,18	0,48	3,20	0,37
Unigene0002839	212	212	C	T	SNP	.	71927.6	0|1	0|1	0|1	0|1	1|1	1|1	0|1	0|1	1|1	0|1	0|1	1|1	0|1	1|1	1|1	1|1	1|1	0|1	1|1	27,86	32231	33,62	47,98	0,48	0,89	72113	16,50	2,81	51,67	46,71	0,50	12,66	0,114	0,125	0,88	0,100	10,43	0,95
Unigene0002839	222	222	A	G	SNP	.	68955.6	0|1	0|1	0|1	0|1	1|1	1|1	0|1	0|1	1|1	0|1	0|1	1|1	0|1	1|1	1|1	1|1	1|1	0|1	1|1	25,79	29224	36,67	47,98	0,47	0,94	68112	14,50	2,73	48,63	45,73	0,46	13,60	0,114	0,124	0,72	0,98	10,37	0,96
Unigene0002841	1969	1969	C	T	SNP	.	6025.15	1|1	0|1	1|1	0|1	1|1	1|1	1|1	1|1	0|1	0|1	0|1	1|1	0|1	1|1	0|0	0|1	1|1	0|1	1|1	0,5	6,25	0,5	6,8	0,3	0,16	0,11	0,9	6,4	3,3	2,6	0,8	2,2	0,29	1,0	1,4	0,16	7,7	0,17
Unigene0002844	1732	1732	A	G	SNP	.	1826.17	1|1	0|1	0|1	1|1	0|1	.|.	0|1	1|1	1|1	1|1	1|1	.|.	1|1	1|1	.|.	0|1	0|1	1|1	0|1	0,1	1,5	4,4	0,1	2,1	.,.	6,8	0,7	0,5	0,2	0,3	.,.	0,3	0,7	.,.	2,1	4,1	0,1	5,4
Unigene0002845	528	528	A	G	SNP	.	42071.1	1|1	0|1	0|1	1|1	0|1	0|1	0|1	1|1	0|1	1|1	1|1	0|1	0|1	0|1	1|1	1|1	0|1	0|1	0|1	0,87	37,83	12,49	0,117	14,29	24,49	36,58	0,42	27,91	0,104	0,59	12,34	31,29	38,74	0,68	0,36	44,79	2,11	44117
Unigene0002863	201	201	A	G	SNP	.	14245.9	1|1	0|1	0|1	0|1	0|1	1|1	1|1	1|1	0|1	0|1	0|1	0|1	1|1	0|1	0|1	1|1	1|1	1|1	1|1	0,31	5,26	3,28	4,23	1,15	0,14	0,22	0,17	10,26	10,13	9,11	1,9	0,10	8,31	7,25	0,15	0,39	0,7	0,23
Unigene0002865	971	971	A	C	SNP	.	2779.9	1|1	1|1	1|1	0|1	1|1	1|1	1|1	1|1	0|1	0|0	1|1	1|1	1|1	0|1	1|1	0|1	0|1	.|.	0|1	0,7	0,10	0,2	2,8	0,5	0,5	0,3	0,8	4,5	1,0	0,2	0,1	0,4	1,5	0,2	2,1	3,5	.,.	1,4
Unigene0002867	1440	1440	G	T	SNP	.	2258.93	0|1	1|1	1|1	0|1	.|.	1|1	0|1	0|1	0|1	1|1	0|1	0|1	.|.	0|1	1|1	1|1	0|1	0|0	0|1	3,1	0,8	0,3	3,7	.,.	0,3	4,6	4,7	2,4	0,2	1,6	4,2	.,.	4,3	0,1	0,8	5,2	1,0	6,2
Unigene0002871	117	117	A	G	SNP	.	72026.1	1|1	0|1	1|1	0|1	0|1	1|1	0|1	0|1	0|1	1|1	0|1	0|1	0|1	1|1	0|1	0|1	1|1	0|1	1|1	1158	112234	5126	33100	114,99	0,58	148103	32127	49271	0,245	48,82	26,21	17,95	0,114	25,28	40,45	0,144	33,59	0,148
Unigene0002871	1282	1282	G	A	SNP	.	20366.8	1|1	1|1	0|1	0|1	1|1	0|1	0|1	1|1	1|1	1|1	0|1	1|1	0|1	0|1	0|1	1|1	0|1	1|1	0|1	0,31	0,53	9,30	14,30	0,22	4,17	24,22	0,5	2,42	0,57	30,26	0,14	27,17	23,54	18,25	0,21	8,38	0,9	17,42
Unigene0002873	204	204	A	G	SNP	.	6463.64	0|0	0|1	0|1	0|1	0|1	1|1	0|1	0|1	1|1	1|1	0|1	0|1	1|1	1|1	0|1	0|1	0|1	1|1	0|1	14,0	8,10	3,12	11,15	1,4	0,11	7,4	9,9	0,12	0,7	5,14	7,6	0,11	0,22	1,5	6,6	3,9	0,9	2,16
Unigene0002873	1669	1669	A	G	SNP	.	1003.25	1|1	1|1	.|.	1|1	1|1	.|.	1|1	0|0	0|1	1|1	1|1	0|1	1|1	0|0	1|1	1|1	1|1	.|.	0|1	0,1	0,1	.,.	0,2	0,3	.,.	0,3	1,0	1,1	.	0,3	1,5	0,2	1,0	0,1	0,2	0,3	.,.	1,1
Unigene0002875	414	414	A	G	SNP	.	1887.85	1|1	1|1	.|.	0|1	1|1	0|1	0|1	1|1	0|1	1|1	0|1	1|1	1|1	0|1	0|1	.|.	1|1	.|.	1|1	0,5	0,4	.,.	3,8	0,2	2,1	3,3	0,5	2,3	0,1	1,2	0,1	0,5	2,2	4,6	.,.	0,3	.,.	0,2
Unigene0002876	134	134	C	T	SNP	.	1274.35	1|1	1|1	.|.	1|1	.|.	0|1	1|1	1|1	1|1	.|.	1|1	0|0	.|.	0|1	.|.	1|1	1|1	1|1	0|1	0,5	0,5	.,.	0,1	.,.	3,0	0,4	0,1	0,1	.,.	0,2	1,0	.,.	2,4	.,.	0,2	0,3	0,1	1,2
Unigene0002879	606	606	C	T	SNP	.	3192.71	1|1	0|1	0|1	1|1	0|0	1|1	0|1	1|1	1|1	1|1	1|1	.|.	0|1	0|0	1|1	0|0	1|1	1|1	1|1	0,6	5,7	2,2	0,7	1,0	0,4	1,2	0,12	0,7	0,3	0,3	.,.	2,4	1,0	0,4	1,0	0,10	0,4	0,8
Unigene0002881	202	202	C	T	SNP	.	4132.99	1|1	1|1	0|1	0|1	1|1	0|0	0|1	1|1	0|1	0|1	0|1	1|1	1|1	0|1	1|1	0|1	0|1	1|1	0|1	0,18	0,4	3,1	3,18	0,4	2,0	2,2	0,6	1,3	2,4	5,10	0,6	0,4	9,8	0,7	2,2	4,3	0,1	2,1
Unigene0002881	5703	5703	C	T	SNP	.	1604.94	1|1	1|1	0|1	0|0	.|.	1|1	0|1	1|1	0|1	1|1	.|.	0|1	.|.	0|0	.|.	0|0	0|1	1|1	0|1	0,12	0,1	4,1	8,0	.,.	0,1	9,1	0,14	0,0	0,2	.,.	0,0	.,.	6,0	.,.	1,0	8,8	0,1	7,5
Unigene0002882	1549	1549	A	G	SNP	.	10071.2	0|1	0|1	1|1	1|1	0|1	0|1	0|1	1|1	0|1	0|1	1|1	0|1	0|1	0|1	1|1	0|1	1|1	0|0	1|1	22,19	26,10	0,11	0,19	15,5	16,18	9,14	0,17	4,21	3,9	0,10	11,7	11,5	34,29	0,23	7,21	0,12	8,1	0,15
Unigene0002893	49	49	A	G	SNP	.	35434.5	1|1	1|1	0|1	0|0	0|1	0|1	1|1	1|1	0|1	0|1	1|1	0|1	0|1	0|0	0|1	0|1	1|1	0|1	1|1	0,122	1,56	28,16	48,0	26,17	17,12	1,47	0,128	22,14	123,28	0,26	30,22	70,88	116,6	30,60	38,73	1,44	60,25	0,48
Unigene0002893	438	438	C	T	SNP	.	2961.69	1|1	.|.	.|.	1|1	1|1	0|0	1|1	1|1	1|1	0|0	0|0	1|1	0|0	1|1	0|0	0|0	.|.	.|.	.|.	0,1	.,.	.,.	0,11	0,7	4,0	0,10	0,3	0,13	39,0	15,0	0,9	15,0	0,14	21,0	8,0	.,.	.,.	.,.
Unigene0002893	439	439	G	C	SNP	.	2858.16	1|1	.|.	.|.	1|1	1|1	0|0	1|1	0|1	1|1	0|0	0|0	1|1	0|0	1|1	0|0	0|0	.|.	.|.	.|.	0,1	.,.	.,.	0,11	0,7	4,0	0,10	2,1	0,13	39,0	15,0	0,9	15,0	0,14	21,0	8,0	.,.	.,.	.,.
Unigene0002897	214	214	G	A	SNP	.	1251.93	1|1	0|1	0|0	0|1	0|1	0|1	0|1	1|1	0|0	1|1	0|0	.|.	1|1	0|1	0|1	0|1	0|1	1|1	1|1	0,2	5,6	4,0	16,7	1,1	5,1	1,1	0,1	2,0	0,1	4,0	.,.	0,1	6,8	5,1	3,1	2,5	0,1	0,2
Unigene0002898	206	206	C	T	SNP	.	2023.33	1|1	0|1	1|1	1|1	0|1	1|1	0|0	.|.	0|1	1|1	0|1	1|1	0|1	0|1	1|1	1|1	1|1	1|1	.|.	0,3	4,8	0,3	0,7	2,3	0,1	2,0	.,.	2,2	0,4	4,2	0,5	2,5	1,3	0,1	0,3	0,5	0,1	.,.
Unigene0002909	816	816	A	G	SNP	.	70588.7	1|1	0|1	1|1	0|1	0|1	1|1	1|1	1|1	0|1	0|1	1|1	0|1	0|1	0|1	0|1	0|1	1|1	1|1	1|1	0,111	27189	0,61	16143	10,75	0,87	0,163	0,73	10123	23107	5,65	9,87	44,48	20146	30,91	30,67	0,140	0,45	1149
Unigene0002912	1326	1326	A	G	SNP	.	1025.87	1|1	0|1	1|1	0|1	0|1	0|0	0|0	1|1	0|1	1|1	0|1	1|1	1|1	0|1	0|1	0|1	0|1	.|.	.|.	0,8	4,2	0,2	5,5	1,1	1,0	2,0	0,1	4,1	0,1	3,1	0,2	0,2	5,2	2,1	2,3	4,1	.,.	.,.
Unigene0002912	1986	1986	C	T	SNP	.	1201.23	1|1	0|1	0|0	0|1	1|1	0|1	0|1	1|1	1|1	.|.	0|1	.|.	0|0	0|1	1|1	1|1	0|1	.|.	1|1	0,3	2,5	1,0	4,5	0,1	2,4	1,4	0,5	0,1	.,.	1,1	.,.	1,0	4,2	0,2	0,1	1,1	.,.	0,1
Unigene0002914	58	58	T	-	Deletion	.	993.91	.|.	1|1	0|0	1|1	0|0	1|1	0|0	.|.	0|1	1|1	.|.	0|1	0|0	1|1	1|1	1|1	0|1	.|.	0|1	.,.	0,7	8,0	0,3	3,0	0,3	1,0	.,.	5,5	0,3	.,.	1,1	2,0	0,3	0,5	0,3	9,3	.,.	4,1
Unigene0002914	750	750	T	C	SNP	.	8067.53	1|1	0|1	0|1	1|1	0|1	0|1	0|1	0|1	0|1	0|1	1|1	0|1	0|0	1|1	1|1	1|1	0|1	0|0	0|1	0,3	6,1	8,16	0,11	14,19	5,8	10,16	4,5	18,24	18,2	0,5	14,11	10,0	0,31	0,12	0,11	11,18	1,0	5,18
Unigene0002914	921	921	T	C	SNP	.	5832.2	1|1	1|1	1|1	0|1	1|1	1|1	0|1	1|1	0|1	1|1	1|1	1|1	1|1	0|1	0|1	0|1	0|1	1|1	0|0	0,12	0,5	0,18	5,8	0,18	0,6	13,11	0,3	20,13	0,11	0,9	0,8	0,2	14,16	9,3	9,4	22,6	0,2	10,0
Unigene0002915	711	711	A	G	SNP	.	2206.28	1|1	1|1	0|1	0|1	1|1	0|1	1|1	0|0	0|0	0|1	1|1	.|.	0|1	1|1	1|1	1|1	0|1	1|1	1|1	0,5	0,1	1,2	1,11	0,1	2,9	0,5	1,0	2,0	1,1	0,5	.,.	1,3	0,5	0,4	0,3	1,2	0,1	0,2
Unigene0002915	875	875	A	T	SNP	.	396.31	.|.	1|1	0|0	0|1	.|.	0|1	0|1	.|.	0|0	.|.	1|1	.|.	1|1	1|1	0|0	1|1	0|0	1|1	0|0	.,.	0,1	2,0	3,1	.,.	2,3	1,1	.,.	3,0	.,.	0,2	.,.	0,1	0,1	4,0	0,1	1,0	0,1	1,0
Unigene0002915	903	903	C	T	SNP	.	1560.41	.|.	1|1	0|0	0|1	.|.	0|1	1|1	.|.	0|1	.|.	1|1	1|1	1|1	1|1	0|0	1|1	0|0	1|1	1|1	.,.	0,2	1,0	1,3	.,.	1,10	0,4	.,.	2,1	.,.	0,3	0,2	0,2	0,11	4,0	0,1	1,0	0,3	0,1
Unigene0002918	1429	1429	C	T	SNP	.	23504.2	1|1	1|1	1|1	0|1	1|1	0|1	1|1	1|1	0|1	1|1	1|1	0|1	1|1	1|1	1|1	1|1	0|1	1|1	0|1	0,45	0,54	0,22	6,31	1,27	12,33	1,44	0,59	7,40	0,28	0,42	3,21	1,34	1,40	0,3	0,25	14,28	0,25	9,30
Unigene0002919	5525	5525	A	G	SNP	.	8647.61	1|1	0|1	1|1	0|1	0|1	0|1	1|1	1|1	0|1	0|1	1|1	0|1	1|1	0|1	1|1	1|1	0|1	0|1	0|1	0,22	4,5	0,14	12,13	2,4	6,7	0,9	0,17	3,14	2,5	0,17	4,7	0,11	7,20	0,21	0,10	4,19	1,3	2,12
Unigene0002924	726	726	T	G	SNP	.	2293.31	0|0	0|1	0|1	1|1	0|1	1|1	.|.	0|0	0|1	0|0	0|1	0|1	0|1	0|1	1|1	1|1	1|1	0|1	1|1	5,0	2,8	1,4	0,5	4,1	0,2	.,.	3,0	1,7	3,0	4,2	1,1	2,7	2,4	0,6	0,2	0,8	1,3	0,6
Unigene0002930	170	170	A	G	SNP	.	693	1|1	1|1	0|1	1|1	0|0	1|1	0|0	.|.	.|.	1|1	.|.	0|0	1|1	0|1	0|1	.|.	0|1	.|.	0|0	0,2	0,1	2,1	0,3	3,0	0,2	4,0	.,.	.,.	0,3	.,.	2,0	0,1	4,1	3,1	.,.	1,5	.,.	3,0
Unigene0002930	190	190	A	G	SNP	.	692.92	1|1	.|.	0|1	1|1	0|0	1|1	0|0	1|1	.|.	1|1	1|1	0|0	1|1	0|1	0|0	.|.	0|1	.|.	0|0	0,2	.,.	1,1	0,3	3,0	0,1	2,0	0,2	.,.	0,3	0,1	2,0	0,1	5,1	4,0	.,.	1,6	.,.	3,0
Unigene0002932	212	212	A	T	SNP	.	1527.94	1|1	1|1	0|1	1|1	0|1	.|.	0|1	1|1	1|1	.|.	0|1	0|0	1|1	0|0	1|1	1|1	1|1	.|.	0|1	0,3	0,1	1,3	0,3	2,1	.,.	1,1	0,1	0,5	.,.	1,2	3,0	0,4	3,0	0,2	0,3	0,7	.,.	2,6
Unigene0002939	166	166	A	G	SNP	.	5298.07	1|1	1|1	0|1	0|1	0|1	1|1	0|1	1|1	1|1	0|1	0|1	0|1	1|1	0|1	1|1	0|1	0|1	0|0	1|1	0,8	0,18	2,2	18,13	2,1	0,5	13,7	0,28	0,3	14,12	9,9	1,2	0,6	12,5	0,6	3,2	1,3	7,0	0,5
Unigene0002939	371	371	A	G	SNP	.	3997.89	0|1	1|1	1|1	0|1	0|0	1|1	0|1	1|1	1|1	1|1	1|1	0|0	1|1	0|1	1|1	0|1	0|1	1|1	0|1	10,1	0,9	0,4	8,10	1,0	0,15	3,2	0,5	0,4	0,8	0,12	1,0	0,4	3,13	0,11	1,5	6,2	0,2	5,4
Unigene0002940	147	147	C	T	SNP	.	1028.59	.|.	1|1	0|1	0|0	1|1	1|1	.|.	.|.	1|1	.|.	1|1	.|.	0|1	0|1	1|1	1|1	1|1	.|.	0|0	.,.	0,1	1,6	1,0	.	0,3	.,.	.,.	.	.,.	0,1	.,.	1,1	1,5	0,1	0,3	0,2	.,.	1,0
Unigene0002940	152	152	G	T	SNP	.	844.2	.|.	1|1	0|1	0|0	1|1	1|1	.|.	.|.	1|1	.|.	1|1	.|.	0|0	0|1	0|1	1|1	1|1	.|.	0|0	.,.	0,2	1,2	1,0	0,1	0,1	.,.	.,.	0,1	.,.	0,1	.,.	1,0	1,3	1,1	0,2	0,0	.,.	1,0
Unigene0002940	164	164	G	T	SNP	.	1197.85	.|.	0|1	0|1	0|1	1|1	0|1	1|1	0|0	1|1	1|1	.|.	0|1	0|0	0|1	0|0	1|1	1|1	1|1	0|1	.,.	0,4	1,5	3,2	0,2	0,2	0,4	1,0	0,3	0,1	.,.	1,2	2,0	1,2	1,0	0,2	0,1	0,1	2,4
Unigene0002949	1843	1843	C	G	SNP	.	6367.3	0|1	1|1	1|1	0|1	1|1	1|1	0|1	1|1	0|1	0|1	0|1	1|1	0|1	0|1	1|1	1|1	0|1	0|0	0|1	2,3	1,23	0,12	5,14	0,13	0,9	3,7	0,13	14,6	4,11	1,10	0,13	2,6	11,10	0,1	0,6	2,11	2,0	1,10
Unigene0002961	1428	1428	A	G	SNP	.	7400.19	0|0	0|1	0|1	1|1	0|1	0|1	0|1	0|0	0|1	1|1	1|1	0|1	0|1	0|1	1|1	0|1	1|1	0|1	1|1	23,0	36,25	3,9	1,46	6,11	23,5	32,25	23,1	6,6	0,1	0,15	2,9	12,4	78,20	0,2	19,8	0,12	6,6	0,9
Unigene0002961	1440	1440	A	C	SNP	.	13425	0|0	1|1	0|1	1|1	1|1	0|1	1|1	0|0	0|1	.|.	1|1	1|1	1|1	1|1	1|1	1|1	1|1	1|1	1|1	19,1	0,51	2,5	0,37	0,12	8,11	0,53	21,0	1,4	.,.	0,12	0,10	0,13	0,82	.	0,24	0,5	0,9	0,3
Unigene0002965	174	174	A	G	SNP	.	4007.68	1|1	0|1	1|1	0|1	1|1	0|1	1|1	1|1	0|1	1|1	1|1	1|1	1|1	0|1	1|1	1|1	0|1	0|0	0|1	0,23	9,4	0,1	6,3	0,2	7,2	0,13	0,6	8,3	0,6	0,3	0,3	0,12	9,12	0,1	0,4	5,1	2,0	4,2
Unigene0002965	199	199	C	G	SNP	.	4025.98	1|1	0|1	.|.	0|1	1|1	0|1	1|1	1|1	0|1	1|1	1|1	1|1	1|1	0|1	1|1	1|1	0|1	0|0	0|0	0,22	8,3	.,.	9,1	0,1	7,4	0,14	0,12	7,2	0,4	0,2	0,3	0,9	7,12	0,1	0,4	5,2	2,0	3,0
Unigene0002967	621	621	A	T	SNP	.	618.05	.|.	0|0	1|1	1|1	1|1	1|1	1|1	1|1	1|1	.|.	0|0	1|1	1|1	1|1	.|.	0|0	.|.	.|.	1|1	.,.	9,0	0,2	0,1	0,1	0,4	0,1	0,1	0,1	.,.	1,0	0,1	0,1	0,3	.,.	1,0	.,.	.,.	0,2
Unigene0002968	15	15	A	G	SNP	.	468.91	0|0	0|0	.|.	1|1	.|.	0|1	.|.	1|1	0|1	1|1	.|.	.|.	1|1	1|1	.|.	1|1	.|.	.|.	.|.	1,0	1,0	.,.	0,2	.,.	2,1	.,.	0,5	1,1	0,1	.,.	.,.	0,1	0,1	.,.	0,1	.,.	.,.	.,.
Unigene0002968	28	28	T	G	SNP	.	1724.37	0|1	0|1	0|1	0|1	0|1	0|1	1|1	0|1	0|1	1|1	.|.	1|1	1|1	1|1	.|.	0|1	0|1	1|1	1|1	1,7	1,2	2,2	2,5	1,4	2,2	0,2	6,2	2,3	0,3	.,.	0,2	0,1	0,6	.,.	3,2	1,1	0,1	0,3
Unigene0002973	183	183	C	G	SNP	.	5918.67	1|1	0|0	1|1	0|1	0|1	1|1	1|1	1|1	0|1	0|1	1|1	0|1	0|1	0|1	0|1	0|1	1|1	0|0	1|1	0,10	6,0	0,11	6,30	1,9	0,2	0,19	0,7	4,5	6,4	0,8	2,10	7,1	10,36	9,6	2,8	0,2	2,0	0,1
Unigene0002974	124	124	C	G	SNP	.	1449.14	1|1	0|1	0|1	0|1	0|0	.|.	0|1	.|.	1|1	1|1	0|1	0|0	1|1	0|1	1|1	0|0	1|1	.|.	1|1	0,2	4,7	4,4	5,1	4,0	.,.	6,1	.,.	0,1	0,3	1,1	3,0	0,2	18,3	0,2	2,0	0,4	.,.	0,1
Unigene0002974	141	141	T	A	SNP	.	1635.24	1|1	0|1	0|1	0|1	0|0	.|.	0|1	1|1	1|1	1|1	0|1	0|0	1|1	0|1	1|1	0|0	1|1	.|.	1|1	0,1	4,6	3,5	3,2	4,0	.,.	6,2	0,1	0,2	0,2	1,6	3,0	0,2	21,4	0,2	2,0	0,6	.,.	0,3
Unigene0002974	1160	1160	G	T	SNP	.	1173.22	0|1	0|1	.|.	1|1	0|1	1|1	1|1	.|.	0|0	.|.	0|1	0|1	0|1	0|1	.|.	1|1	1|1	1|1	0|0	1,1	2,5	.,.	0,5	1,5	0,3	1,6	.,.	2,0	.,.	2,1	1,4	1,2	1,4	.,.	0,1	0,1	0,1	1,0
Unigene0002976	26	26	A	T	SNP	.	4726.91	0|0	0|1	1|1	1|1	0|1	0|1	1|1	0|0	0|1	0|0	1|1	1|1	0|1	1|1	0|1	1|1	0|1	0|1	0|1	8,0	7,8	0,6	0,7	4,4	4,7	0,22	17,1	2,8	16,1	0,11	0,5	11,2	0,16	2,2	0,11	1,7	7,1	4,4
Unigene0002976	116	116	T	G	SNP	.	1874.77	0|0	0|1	1|1	1|1	0|1	0|1	0|1	0|0	0|1	0|0	1|1	1|1	0|0	0|1	0|1	1|1	1|1	0|0	0|1	25,0	4,6	0,4	0,5	2,3	2,5	38,4	56,0	2,5	11,0	0,9	0,3	9,1	24,3	1,3	0,8	0,4	4,0	3,1
Unigene0002976	542	542	T	C	SNP	.	12985.3	1|1	1|1	0|1	0|1	0|1	0|1	0|1	0|1	1|1	0|1	1|1	0|0	0|1	1|1	0|1	0|1	1|1	0|1	1|1	0,29	0,52	12,5	17,13	10,7	4,12	19,13	16,25	0,16	39,26	0,20	6,0	30,16	1,45	5,25	18,15	0,13	10,10	0,21
Unigene0002976	1056	1056	A	G	SNP	.	3525.61	1|1	0|1	1|1	0|1	0|1	0|1	0|1	1|1	0|1	1|1	0|1	1|1	0|0	0|1	0|1	0|1	0|1	1|1	0|1	0,7	25,8	0,8	11,8	1,5	1,4	2,5	0,7	7,6	0,5	3,10	0,6	3,0	5,8	11,2	3,3	6,4	0,1	3,4
Unigene0002976	1086	1086	A	G	SNP	.	1083.08	.|.	0|0	1|1	0|1	1|1	0|1	1|1	.|.	0|1	.|.	1|1	1|1	0|0	0|1	0|0	0|0	0|1	.|.	1|1	.,.	18,0	0,5	7,5	0,3	1,1	0,3	.,.	8,2	.,.	0,4	0,2	2,0	3,3	13,0	1,0	5,2	.,.	0,3
Unigene0002976	1094	1094	G	T	SNP	.	2166.29	.|.	1|1	0|0	0|1	0|0	1|1	0|0	.|.	0|1	.|.	0|0	.|.	1|1	0|1	1|1	1|1	1|1	.|.	0|0	.,.	0,24	4,0	4,9	3,0	0,1	1,0	.,.	1,8	.,.	3,0	.,.	0,1	2,4	0,16	0,1	0,5	.,.	1,0
Unigene0002976	1120	1120	C	T	SNP	.	2022.01	.|.	1|1	0|0	1|1	0|0	1|1	.|.	.|.	0|1	.|.	0|1	.|.	1|1	1|1	1|1	1|1	1|1	.|.	.|.	.,.	0,23	1,0	0,7	1,0	0,2	.,.	.,.	1,7	.,.	1,1	.,.	0,1	0,5	0,10	0,1	0,3	.,.	.,.
Unigene0002977	817	817	A	G	SNP	.	65688.7	1|1	0|1	1|1	1|1	0|1	1|1	0|1	1|1	1|1	1|1	0|1	0|1	0|1	0|1	0|1	0|1	0|1	0|1	1|1	0,77	73123	7,84	0,167	36,43	0,55	60141	0,93	2,65	0,115	29,70	27,51	26,64	45133	37127	17122	9,69	6,37	2,78
Unigene0002982	321	321	C	T	SNP	.	1017.97	0|1	0|0	1|1	1|1	1|1	.|.	0|1	1|1	0|0	0|0	1|1	1|1	.|.	0|1	0|1	.|.	0|1	0|0	0|1	3,5	1,0	0,4	0,1	0,2	.,.	2,2	0,1	5,0	4,0	0,1	0,2	.,.	12,9	2,1	.,.	6,2	2,0	9,2
Unigene0002982	405	405	G	C	SNP	.	1148.41	1|1	1|1	1|1	1|1	1|1	0|0	0|1	1|1	0|0	0|1	.|.	1|1	.|.	0|1	1|1	1|1	0|1	0|0	0|0	0,3	0,1	0,3	0,6	0,1	2,0	1,2	0,2	5,1	2,4	.,.	0,2	.,.	13,6	0,3	0,1	10,2	1,0	15,1
Unigene0002983	712	712	A	G	SNP	.	1972.45	0|0	0|1	0|1	0|1	0|1	0|1	0|1	0|1	1|1	.|.	0|1	1|1	1|1	1|1	.|.	0|1	1|1	1|1	1|1	5,0	3,3	1,4	2,4	3,1	1,2	2,1	4,2	0,7	.,.	1,2	0,2	0,5	0,12	.,.	1,1	0,4	0,3	0,2
Unigene0002993	170	170	G	T	SNP	.	12045	1|1	0|1	0|1	0|1	0|1	0|1	1|1	1|1	1|1	0|1	0|1	0|1	0|1	0|1	0|1	0|1	1|1	0|1	1|1	0,13	13,8	4,19	7,23	8,16	7,8	0,25	0,1	0,9	4,26	12,26	8,28	6,10	29,20	8,28	6,18	0,29	1,5	0,10
Unigene0002993	195	195	G	T	SNP	.	19598.9	1|1	0|1	1|1	1|1	0|1	1|1	1|1	1|1	1|1	0|1	0|1	0|1	0|1	0|1	1|1	1|1	1|1	1|1	1|1	0,19	7,24	0,26	0,33	4,24	1,24	0,30	0,2	0,18	6,26	17,30	5,27	3,17	16,40	0,48	0,29	0,35	0,5	0,16
Unigene0002994	430	430	A	G	SNP	.	2615.02	0|0	0|1	0|1	0|1	1|1	1|1	0|1	1|1	0|1	0|1	0|1	1|1	1|1	0|1	1|1	0|0	1|1	.|.	1|1	8,0	4,9	1,5	1,1	0,3	0,1	2,3	0,1	3,2	1,11	4,2	0,7	0,5	4,7	0,5	1,0	0,7	.,.	0,6
Unigene0002996	715	715	C	T	SNP	.	1375.75	.|.	1|1	0|1	0|0	.|.	.|.	0|0	1|1	0|1	1|1	0|0	0|1	1|1	0|1	0|1	0|1	0|1	1|1	1|1	.,.	0,1	2,1	3,0	.,.	.,.	2,0	0,5	2,5	0,6	1,0	3,1	0,1	2,2	2,1	1,1	1,4	0,1	0,11
Unigene0002997	226	226	A	G	SNP	.	2724.82	0|1	1|1	0|1	0|1	1|1	1|1	.|.	0|0	1|1	.|.	0|1	1|1	1|1	0|1	1|1	1|1	0|1	1|1	1|1	7,1	0,1	2,5	4,11	0,3	0,2	.,.	6,0	0,4	.,.	1,6	0,2	0,5	4,1	0,17	0,1	2,8	0,1	0,4
Unigene0003008	174	174	A	G	SNP	.	2677.21	1|1	0|1	1|1	0|1	0|1	1|1	0|1	1|1	1|1	.|.	1|1	1|1	1|1	0|1	0|1	1|1	1|1	1|1	1|1	0,13	6,8	0,3	8,9	1,2	0,1	4,2	0,7	0,2	.,.	0,2	0,2	0,2	8,7	1,5	0,1	0,5	0,1	0,3
Unigene0003008	198	198	C	T	SNP	.	2345.33	1|1	0|1	1|1	0|1	0|1	1|1	0|1	0|1	0|1	1|1	1|1	0|0	0|1	0|1	0|1	0|0	1|1	0|0	1|1	0,13	6,5	0,2	10,9	2,1	0,1	2,4	3,5	1,1	0,1	0,2	2,0	1,1	9,7	3,6	1,0	0,3	1,0	0,4
Unigene0003010	1244	1244	A	G	SNP	.	698.76	1|1	1|1	1|1	0|0	.|.	1|1	0|1	1|1	.|.	1|1	0|0	1|1	.|.	0|0	.|.	0|0	1|1	.|.	1|1	0,1	0,2	0,2	8,0	.,.	0,3	12,1	0,7	.,.	0,2	4,1	0,1	.,.	3,0	.,.	9,0	0,1	.,.	0,1
Unigene0003012	367	367	A	G	SNP	.	10258.9	0|1	1|1	0|1	1|1	1|1	1|1	0|1	0|1	0|1	1|1	1|1	1|1	0|1	0|1	0|1	0|1	1|1	1|1	1|1	11,25	0,10	2,12	0,35	0,15	0,6	20,19	3,10	3,10	0,38	0,21	0,16	5,9	5,8	8,2	13,10	1,3	0,9	0,8
Unigene0003012	531	531	C	T	SNP	.	13620.3	0|1	1|1	1|1	0|1	0|1	1|1	0|1	0|1	1|1	1|1	0|1	0|1	0|1	1|1	1|1	0|1	1|1	1|1	1|1	21,19	0,36	0,7	7,11	6,10	0,8	8,21	4,19	0,10	0,48	5,49	4,8	2,11	0,19	0,12	4,19	0,19	0,15	0,17
Unigene0003015	617	617	C	G	SNP	.	9682.61	1|1	1|1	0|1	0|1	0|1	0|1	0|1	1|1	1|1	1|1	0|1	0|1	1|1	0|1	1|1	1|1	1|1	1|1	1|1	0,7	1,34	4,10	8,11	7,11	1,5	3,32	0,20	0,8	1,25	3,19	3,17	0,7	6,9	0,3	0,10	0,7	1,15	0,11
Unigene0003015	720	720	C	T	SNP	.	2137.24	.|.	1|1	0|1	0|1	1|1	1|1	1|1	0|0	0|1	0|0	1|1	1|1	0|1	1|1	1|1	1|1	0|1	0|0	0|0	.,.	0,8	1,7	2,8	0,5	0,2	0,4	1,0	1,2	1,0	0,4	0,3	1,1	0,5	0,1	0,7	1,1	1,0	1,0
Unigene0003032	91	91	C	G	SNP	.	4453.78	1|1	1|1	0|1	0|1	1|1	1|1	0|1	1|1	1|1	.|.	1|1	1|1	1|1	1|1	1|1	0|1	0|1	1|1	0|1	0,13	0,13	1,4	2,19	0,2	0,3	1,13	0,5	0,11	.,.	0,4	0,3	0,5	0,7	0,11	1,6	3,8	0,2	6,8
Unigene0003038	142	142	T	A	SNP	.	1088.1	0|0	0|0	.|.	1|1	1|1	.|.	1|1	0|0	0|0	0|0	.|.	1|1	0|0	0|0	0|1	0|0	1|1	0|0	1|1	6,0	21,2	.,.	0,11	0,1	.,.	0,11	3,0	2,0	13,0	.,.	0,2	23,0	9,0	9,2	3,0	0,4	5,0	0,2
Unigene0003038	670	670	A	G	SNP	.	47580.1	1|1	1|1	0|1	0|1	0|1	0|1	1|1	0|1	0|1	0|1	0|1	0|1	1|1	0|1	1|1	1|1	0|1	1|1	0|1	0,76	0,117	27,19	104,52	33,59	47,68	0,119	21,81	38,84	108,90	30,65	17,19	0,23	42,52	0,101	0,46	31,64	0,74	45,87
Unigene0003038	768	768	T	C	SNP	.	25554.3	1|1	1|1	0|1	0|1	0|1	0|1	1|1	0|1	0|1	0|1	0|1	0|1	1|1	0|1	1|1	1|1	0|1	1|1	0|1	0,18	0,16	24,2	108,43	41,49	42,17	0,70	23,43	50,53	87,57	41,24	28,14	0,22	38,12	0,54	0,5	47,61	0,57	49,64
Unigene0003038	786	786	T	C	SNP	.	20718.2	1|1	1|1	0|0	0|1	0|1	0|1	1|1	0|1	0|1	0|1	0|1	0|1	1|1	0|1	1|1	1|1	0|1	1|1	0|1	0,14	0,7	21,1	88,35	35,40	37,8	0,56	20,34	40,39	75,37	35,22	21,12	0,17	36,8	0,43	0,7	34,51	0,40	36,52
Unigene0003040	173	173	T	A	SNP	.	294.23	.|.	1|1	.|.	0|1	0|0	1|1	0|0	.|.	0|1	1|1	0|0	0|0	1|1	0|0	1|1	.|.	1|1	.|.	.|.	.,.	0,1	.,.	3,1	1,0	0,2	1,0	.,.	3,1	0,1	3,0	1,0	0,1	5,0	0,1	.,.	0,1	.,.	.,.
Unigene0003041	990	990	A	G	SNP	.	3463.45	1|1	1|1	0|1	0|1	0|1	1|1	0|1	1|1	0|1	1|1	1|1	0|1	0|1	0|1	0|1	1|1	1|1	1|1	1|1	0,9	0,12	1,1	5,5	1,1	0,9	3,4	0,5	1,6	0,2	0,7	4,3	2,5	3,8	2,4	0,4	0,8	0,1	0,2
Unigene0003047	1051	1051	C	T	SNP	.	11562.5	1|1	0|1	0|1	0|1	0|1	0|1	1|1	0|1	0|1	0|1	0|1	0|1	1|1	1|1	0|1	1|1	0|1	1|1	0|1	0,25	10,10	2,17	5,33	7,7	6,16	0,24	2,19	4,11	5,22	8,17	11,10	0,15	0,36	3,11	1,17	8,10	0,6	4,20
Unigene0003056	483	483	A	G	SNP	.	1426.92	1|1	1|1	0|1	0|0	1|1	0|1	0|1	1|1	0|1	0|1	1|1	1|1	1|1	1|1	.|.	0|0	0|1	1|1	0|1	0,4	0,3	8,3	2,0	0,2	1,5	1,2	0,3	1,5	3,1	0,3	0,1	0,4	0,4	.,.	1,0	4,2	0,2	2,3
Unigene0003060	751	751	C	A	SNP	.	1445.45	0|0	0|1	.|.	0|0	.|.	0|0	0|1	0|0	0|1	.|.	1|1	.|.	1|1	0|0	1|1	0|1	1|1	1|1	1|1	19,0	1,8	.,.	7,0	.,.	.	10,2	30,1	6,2	.,.	0,3	.,.	0,1	6,0	0,9	7,2	0,1	0,1	0,4
Unigene0003061	672	672	G	T	SNP	.	3021.22	1|1	0|1	0|1	0|1	0|1	1|1	1|1	1|1	0|1	0|1	.|.	0|1	.|.	1|1	0|1	1|1	1|1	1|1	1|1	0,1	7,15	5,9	4,1	8,4	0,1	0,5	0,13	3,2	9,8	.,.	10,8	.,.	0,1	3,5	0,4	0,2	0,2	0,1
Unigene0003071	758	758	G	C	SNP	.	5586.88	1|1	1|1	1|1	0|1	0|1	0|1	1|1	0|1	0|0	0|0	0|1	0|1	0|1	1|1	0|1	1|1	1|1	1|1	1|1	0,6	0,22	0,5	13,6	4,5	2,1	0,14	13,25	18,1	38,0	11,15	10,5	17,2	0,8	10,1	0,2	0,2	0,4	0,12
Unigene0003071	1508	1508	C	T	SNP	.	1264.78	1|1	1|1	1|1	0|0	0|1	0|0	1|1	0|1	0|1	0|0	0|1	0|0	0|1	1|1	0|1	.|.	0|1	1|1	0|1	0,5	0,1	0,1	6,0	2,1	2,0	0,1	3,7	13,2	25,1	10,4	3,0	4,1	0,2	1,1	.,.	2,0	0,2	1,5
Unigene0003071	1533	1533	G	A	SNP	.	1677.01	1|1	1|1	1|1	0|1	0|1	0|1	1|1	0|1	0|1	0|0	0|1	0|1	0|1	1|1	.|.	.|.	0|1	1|1	0|1	0,4	0,3	0,1	7,1	1,1	1,1	0,4	8,12	16,2	24,0	11,2	2,1	5,2	0,1	.,.	.,.	2,2	0,3	4,5
Unigene0003071	1718	1718	A	G	SNP	.	4161.25	1|1	0|1	.|.	0|1	0|1	0|0	1|1	1|1	0|1	0|0	0|1	0|1	0|1	1|1	1|1	1|1	0|0	0|1	0|1	0,2	2,8	.,.	6,1	7,4	4,0	0,3	0,67	17,7	34,0	4,1	1,4	13,4	0,1	0,3	0,6	1,0	4,1	12,1
Unigene0003085	487	487	T	A	SNP	.	30210.1	1|1	0|1	0|1	0|1	0|1	1|1	0|1	1|1	0|1	1|1	0|1	0|1	0|1	0|1	0|1	0|1	1|1	0|1	1|1	0,28	60144	32,33	24,20	137,14	0,13	73,55	0,35	151,68	0,122	35,53	78,7	53,26	14,29	7,3	31,13	0,15	19,28	0,132
Unigene0003085	610	610	A	C	SNP	.	64794.2	1|1	0|1	1|1	0|1	0|1	0|1	1|1	1|1	0|1	1|1	1|1	0|1	0|1	1|1	1|1	0|1	0|1	0|1	0|1	0,5	8,72	2103	2,24	15139	15,18	10124	1,53	23,59	8137	3233	12,96	78178	1,48	0,2	10,67	7,21	21,61	70,99
Unigene0003085	645	645	C	T	SNP	.	54457.2	1|1	0|1	0|1	0|1	1|1	0|1	0|1	1|1	0|1	0|1	0|1	1|1	0|1	1|1	0|1	1|1	0|1	0|1	0|1	0,36	22130	60,90	54,11	0,203	31,30	33127	1,3	95,60	67143	151158	1130	217,91	5,84	1,5	3,87	13,20	85,9	121118
Unigene0003086	281	281	T	A	SNP	.	3922.26	1|1	1|1	0|1	1|1	1|1	0|0	1|1	.|.	0|1	0|0	1|1	1|1	1|1	0|1	.|.	.|.	0|1	.|.	0|1	0,24	0,25	1,1	0,8	0,2	7,0	0,4	.,.	10,1	3,0	0,5	0,3	0,3	3,7	.,.	.,.	6,2	.,.	6,5
Unigene0003090	1180	1180	A	G	SNP	.	17893.1	1|1	0|1	0|1	0|1	1|1	0|1	1|1	0|1	0|1	0|1	0|1	1|1	0|1	0|1	0|1	1|1	0|1	1|1	0|1	0,35	50,37	9,39	5,21	0,17	32,8	0,26	12,17	24,33	15,27	10,30	0,20	10,40	26,42	6,23	0,22	11,35	0,26	20,41
Unigene0003090	1183	1183	C	T	SNP	.	20327.1	0|1	0|1	0|1	0|1	1|1	0|1	1|1	0|1	0|1	0|1	0|1	1|1	1|1	0|1	0|1	1|1	0|1	1|1	0|1	11,23	24,57	9,37	4,20	0,15	8,30	0,25	6,22	10,42	9,33	5,33	0,19	0,46	26,41	10,18	0,20	8,34	0,24	15,44
Unigene0003091	375	375	A	T	SNP	.	4482.9	1|1	0|1	1|1	0|1	1|1	1|1	0|1	1|1	0|0	0|1	1|1	1|1	0|0	0|1	0|1	0|1	0|1	1|1	0|1	0,2	11,2	0,2	13,57	0,1	1,17	10,19	0,2	6,0	1,2	0,3	0,6	2,0	2,1	7,6	6,1	4,4	0,4	5,1
Unigene0003091	1461	1461	C	G	SNP	.	1523.46	0|0	0|1	1|1	0|1	.|.	0|0	0|1	.|.	1|1	.|.	.|.	0|1	0|0	1|1	1|1	.|.	1|1	.|.	1|1	1,0	1,5	0,3	17,7	.,.	5,0	1,9	.,.	0,2	.,.	.,.	2,1	1,0	0,2	0,12	.,.	0,5	.,.	0,3
Unigene0003091	1479	1479	C	T	SNP	.	1590.3	.|.	0|1	1|1	0|1	.|.	0|0	1|1	.|.	1|1	.|.	.|.	1|1	1|1	.|.	1|1	.|.	1|1	.|.	1|1	.,.	1,6	0,3	18,10	.,.	3,0	0,9	.,.	0,2	.,.	.,.	0,1	0,2	.,.	0,12	.,.	0,4	.,.	0,2
Unigene0003100	195	195	C	A	SNP	.	2381.33	0|0	0|1	1|1	0|1	0|1	0|0	0|1	0|1	0|1	0|1	0|1	1|1	1|1	1|1	1|1	0|1	.|.	1|1	0|0	3,0	6,5	0,3	1,1	3,1	2,0	8,8	3,3	1,3	17,26	3,10	0,1	0,3	0,1	0,4	4,4	.,.	0,1	3,0
Unigene0003100	540	540	A	G	SNP	.	10974.1	1|1	0|1	0|1	1|1	0|1	1|1	0|1	1|1	0|1	0|1	1|1	0|1	1|1	0|1	0|1	0|1	1|1	0|1	1|1	0,3	26,25	1,1	0,7	4,5	0,1	12,58	0,18	4,13	25,73	0,8	3,6	0,7	5,6	2,5	7,32	0,5	3,8	0,4
Unigene0003111	468	468	A	C	SNP	.	28546.9	0|1	0|1	1|1	0|1	1|1	0|1	1|1	1|1	1|1	1|1	1|1	1|1	0|1	1|1	0|1	1|1	1|1	0|1	1|1	26,42	8,30	0,34	18,36	0,29	6,19	4,54	0,98	0,98	0,13	0,10	1,55	15,31	4,55	18,38	2,27	0,24	2,22	0,35
Unigene0003111	605	605	A	G	SNP	.	2035.99	0|0	0|1	1|1	1|1	0|1	1|1	1|1	1|1	0|0	0|0	.|.	0|1	1|1	1|1	1|1	0|0	.|.	0|0	0|0	3,0	1,6	0,2	0,9	1,1	0,4	0,1	0,2	1,0	1,0	.,.	2,1	0,14	0,1	1,14	1,0	.,.	1,0	1,0
Unigene0003111	655	655	A	G	SNP	.	583.37	0|0	0|0	1|1	1|1	1|1	1|1	1|1	1|1	1|1	0|0	.|.	0|1	1|1	1|1	0|1	0|0	.|.	0|0	0|0	3,0	1,0	0,2	0,1	0,2	0,1	0,1	0,2	0,1	1,0	.,.	1,2	0,2	0,1	1,1	1,0	.,.	1,0	1,0
Unigene0003125	232	232	A	C	SNP	.	15748.9	1|1	1|1	1|1	1|1	0|1	1|1	0|1	1|1	0|1	1|1	1|1	0|1	0|1	1|1	0|1	0|1	0|1	1|1	0|1	0,53	0,25	0,11	2,32	2,7	1,13	4,19	0,12	3,21	0,18	0,34	4,8	3,14	1,42	14,47	2,5	3,27	0,3	4,30
Unigene0003125	878	878	G	T	SNP	.	855.4	.|.	0|1	.|.	1|1	0|1	.|.	1|1	1|1	1|1	.|.	.|.	1|1	1|1	0|1	0|0	0|1	.|.	1|1	0|0	.,.	5,1	.,.	0,6	1,2	.,.	0,2	0,1	0,1	.,.	.,.	0,3	0,1	2,3	1,0	2,2	.,.	0,1	2,0
Unigene0003125	1201	1201	A	G	SNP	.	1288.58	1|1	1|1	1|1	.|.	0|1	.|.	1|1	1|1	1|1	1|1	0|0	0|1	.|.	1|1	.|.	0|1	0|1	.|.	0|1	0,3	0,5	0,1	.,.	11,1	.,.	0,6	0,4	0,3	0,3	4,0	5,1	.,.	0,1	.,.	4,3	5,1	.,.	7,3
Unigene0003129	235	235	C	T	SNP	.	3451.89	1|1	0|1	1|1	0|1	0|1	0|1	0|1	1|1	0|0	0|1	0|1	0|1	1|1	0|1	0|0	0|1	1|1	.|.	1|1	0,10	3,10	0,3	4,14	3,2	2,1	4,9	0,2	6,0	3,6	2,5	4,2	0,1	3,9	13,0	1,1	0,10	.,.	0,3
Unigene0003130	1152	1152	A	G	SNP	.	989.54	1|1	0|0	0|1	1|1	1|1	0|1	1|1	1|1	0|1	1|1	0|0	0|0	1|1	0|1	.|.	1|1	0|1	.|.	0|1	0,3	3,0	1,1	0,6	0,1	1,1	0,2	0,1	4,1	0,1	2,0	1,0	0,1	3,6	.,.	0,3	4,1	.,.	1,2
Unigene0003132	208	208	A	G	SNP	.	143564	1|1	0|1	0|1	0|1	1|1	1|1	0|1	1|1	0|1	0|1	1|1	1|1	0|1	1|1	0|1	0|1	0|1	0|1	0|1	0,343	95260	39194	38290	0,115	0,244	32190	4165	96168	14146	0,158	0,183	29147	1359	40271	28120	87221	19,43	103191
Unigene0003149	382	382	A	T	SNP	.	3229.06	0|1	1|1	0|1	0|1	0|1	0|1	0|1	0|0	1|1	0|1	1|1	0|1	.|.	1|1	1|1	0|1	1|1	1|1	0|1	3,3	0,11	3,1	7,7	2,3	1,4	2,3	1,0	0,10	2,6	0,1	2,1	.,.	0,7	0,12	2,5	0,3	0,5	1,5
Unigene0003149	400	400	G	T	SNP	.	1350.72	.|.	0|1	0|1	1|1	1|1	1|1	0|1	.|.	0|0	1|1	1|1	1|1	.|.	1|1	0|1	0|1	0|1	0|0	0|1	.,.	7,3	1,1	0,9	0,2	0,1	0,2	.,.	6,0	0,3	0,1	0,2	.,.	0,7	7,3	2,3	2,1	3,0	9,1
Unigene0003149	436	436	A	G	SNP	.	3348.26	.|.	0|1	1|1	0|1	1|1	1|1	0|1	1|1	0|1	0|1	1|1	1|1	1|1	0|1	0|1	0|1	0|1	0|1	0|1	.,.	10,8	0,1	9,5	0,9	0,8	2,8	0,1	7,3	5,12	0,3	0,3	0,2	8,10	8,6	4,3	6,8	4,1	13,4
Unigene0003158	1119	1119	C	G	SNP	.	6195.04	1|1	0|1	0|1	1|1	1|1	0|1	1|1	1|1	0|1	0|1	1|1	0|1	0|1	0|1	0|1	0|1	1|1	0|1	1|1	0,20	16,8	4,6	0,20	0,5	9,2	0,6	0,4	7,8	2,8	0,9	4,4	2,12	9,9	1,6	3,3	0,24	4,3	0,11
Unigene0003159	120	120	G	C	SNP	.	2906.75	1|1	0|1	0|1	0|1	0|1	1|1	0|1	0|1	0|1	1|1	0|1	0|0	1|1	0|1	1|1	1|1	0|1	0|1	0|0	0,11	6,6	4,2	7,9	7,1	0,9	7,5	2,16	8,7	0,2	3,2	6,0	0,9	11,3	0,2	0,2	14,3	3,5	1,0
Unigene0003178	1712	1712	C	G	SNP	.	2475.61	0|0	0|1	1|1	0|1	0|1	1|1	0|1	0|1	0|1	0|1	1|1	0|1	0|1	0|1	0|1	1|1	0|1	1|1	1|1	9,0	5,4	0,5	2,2	1,5	0,4	2,7	6,2	3,2	3,6	0,7	2,4	5,2	8,6	3,5	0,1	1,4	1,4	0,3
Unigene0003181	1308	1308	A	G	SNP	.	24998.1	0|1	0|1	0|1	0|1	0|1	1|1	0|1	0|1	1|1	1|1	1|1	0|1	0|1	1|1	0|1	1|1	0|1	1|1	0|1	30,46	41,80	5,10	35,35	12,16	0,48	24,32	38,6	1,54	0,69	0,30	3,15	8,29	0,72	5,29	0,33	14,34	0,22	17,36
Unigene0003188	244	244	G	A	SNP	.	586.98	0|1	.|.	.|.	1|1	1|1	1|1	1|1	1|1	1|1	0|1	.|.	0|1	.|.	1|1	0|0	.|.	.|.	.|.	.|.	1,1	.,.	.,.	0,1	0,2	0,1	0,1	0,1	0,1	1,1	.,.	1,3	.,.	0,5	1,0	.,.	.,.	.,.	.,.
Unigene0003188	728	728	A	T	SNP	.	2415.12	0|1	1|1	0|1	0|1	0|1	0|1	0|1	0|1	0|1	1|1	1|1	0|1	1|1	0|1	1|1	.|.	1|1	1|1	1|1	4,1	0,7	1,1	3,4	1,1	1,4	1,2	2,1	1,3	0,7	0,3	1,5	0,5	5,6	0,1	.,.	0,8	0,4	0,5
Unigene0003192	475	475	C	T	SNP	.	21449.7	0|1	0|1	0|1	1|1	1|1	0|1	1|1	0|1	1|1	1|1	1|1	0|1	1|1	1|1	0|1	1|1	0|1	0|1	1|1	15,33	6,23	4,9	0,17	1,17	1,13	0,15	11,35	4,58	1,53	0,20	6,31	0,43	0,34	2,8	0,5	2,14	5,22	4,71
Unigene0003194	1384	1384	G	T	SNP	.	1256.86	0|0	0|0	1|1	0|0	0|0	1|1	1|1	.|.	0|0	1|1	0|0	1|1	0|1	1|1	.|.	0|1	0|0	.|.	0|1	2,0	10,0	0,7	6,0	2,0	0,1	0,6	.,.	1,0	0,4	1,0	0,3	1,5	0,2	.,.	4,5	4,0	.,.	4,1
Unigene0003195	976	976	T	C	SNP	.	7811.99	0|1	1|1	1|1	1|1	1|1	1|1	1|1	0|0	0|1	0|1	1|1	1|1	0|1	1|1	0|1	0|1	0|1	1|1	0|1	12,4	0,15	0,23	0,10	0,12	0,12	0,12	21,0	8,16	2,10	0,7	0,10	6,14	0,20	4,7	3,6	9,13	0,7	1,1
Unigene0003195	2495	2495	C	G	SNP	.	6384.01	0|1	0|1	0|1	0|1	0|1	0|1	0|1	0|1	0|1	1|1	1|1	1|1	1|1	1|1	1|1	0|1	1|1	.|.	1|1	6,7	3,17	3,13	6,3	3,13	1,6	2,8	8,8	3,12	0,2	0,4	0,13	0,10	0,11	0,1	3,3	0,13	.,.	0,9
Unigene0003195	2497	2497	A	T	SNP	.	6384.01	0|1	0|1	0|1	0|1	0|1	0|1	0|1	0|1	0|1	1|1	1|1	1|1	1|1	1|1	1|1	0|1	1|1	.|.	1|1	6,7	3,17	3,13	7,3	3,12	1,6	2,8	8,8	4,13	0,2	0,4	0,12	0,10	0,11	0,1	3,3	0,11	.,.	0,9
Unigene0003195	2833	2833	T	-	Deletion	.	1241.14	1|1	0|1	0|1	0|0	0|1	0|1	0|1	0|1	0|1	1|1	1|1	0|1	1|1	1|1	.|.	0|1	1|1	.|.	1|1	0,5	7,6	5,1	3,0	5,2	1,2	3,1	6,2	7,6	0,1	0,1	3,2	0,4	0,5	.,.	2,1	0,4	.,.	0,1
Unigene0003195	5164	5164	A	G	SNP	.	3211.12	0|1	0|1	1|1	0|1	1|1	1|1	1|1	0|1	0|1	1|1	.|.	1|1	0|1	0|1	1|1	1|1	0|1	0|1	0|1	5,3	8,14	1,3	2,10	0,8	0,1	0,4	2,4	5,7	0,4	.,.	0,4	1,5	3,9	0,1	0,6	2,5	1,2	4,5
Unigene0003195	6204	6204	A	T	SNP	.	2107.07	0|1	0|1	0|0	1|1	0|1	.|.	0|1	1|1	0|1	0|0	1|1	0|1	0|1	0|1	.|.	1|1	1|1	1|1	0|1	1,4	11,9	3,0	0,3	2,6	.,.	2,3	0,5	3,6	1,0	0,1	2,3	2,5	3,9	.,.	0,1	0,3	0,3	1,1
Unigene0003195	6271	6271	A	T	SNP	.	1738.43	1|1	0|1	0|1	1|1	0|1	0|1	1|1	1|1	0|1	.|.	1|1	0|0	0|1	0|1	.|.	1|1	0|0	1|1	0|1	0,4	12,6	1,1	0,1	5,4	1,2	0,5	0,4	5,4	.,.	0,1	4,0	2,3	4,8	.,.	0,1	1,0	0,4	2,1
Unigene0003195	6907	6907	A	G	SNP	.	2783.75	1|1	1|1	1|1	0|1	0|1	0|0	1|1	1|1	0|1	.|.	1|1	0|1	0|1	0|1	.|.	1|1	0|1	0|0	0|1	0,2	0,17	0,5	2,4	1,3	1,0	0,3	0,7	1,13	.,.	0,1	2,2	3,9	3,7	.,.	0,3	1,1	1,0	1,5
Unigene0003195	7821	7821	G	A	SNP	.	1078.82	0|0	1|1	0|1	1|1	.|.	0|1	0|1	0|0	0|0	.|.	1|1	1|1	1|1	1|1	.|.	1|1	0|0	1|1	0|1	8,0	0,3	2,2	0,4	.,.	1,4	1,4	15,0	2,0	.,.	0,1	0,1	0,4	0,4	.,.	0,1	2,0	0,1	2,1
Unigene0003198	224	224	A	G	SNP	.	3050.67	0|1	0|1	1|1	0|1	1|1	0|1	0|1	0|1	0|1	1|1	1|1	1|1	0|1	1|1	0|0	0|0	1|1	1|1	0|1	7,12	3,7	0,9	3,3	0,5	1,5	1,5	10,8	8,9	0,2	0,2	0,5	1,3	0,4	1,0	1,0	0,3	0,1	2,9
Unigene0003198	236	236	G	A	SNP	.	3628.34	1|1	0|1	0|1	0|1	0|1	0|1	0|1	1|1	1|1	1|1	1|1	0|1	1|1	0|1	0|1	1|1	0|1	1|1	0|1	0,18	7,6	5,3	2,3	3,3	3,2	3,4	0,18	0,15	0,3	0,1	3,2	0,4	2,2	1,1	0,3	1,2	0,2	3,7
Unigene0003204	195	195	A	T	SNP	.	18151.4	1|1	1|1	1|1	1|1	1|1	1|1	0|1	1|1	0|1	1|1	1|1	1|1	0|1	1|1	0|1	0|1	0|1	1|1	0|1	0,42	0,56	0,13	0,25	0,43	0,5	12,24	0,29	13,39	0,24	0,22	0,29	6,42	0,48	4,7	5,4	5,13	0,16	11,20
Unigene0003205	51	51	G	C	SNP	.	4547.09	1|1	1|1	0|1	0|1	0|1	0|0	.|.	1|1	0|1	.|.	.|.	0|0	1|1	0|1	0|1	1|1	1|1	1|1	1|1	0,19	0,8	6,3	5,3	1,2	10,0	.,.	0,9	3,17	.,.	.,.	3,0	0,5	11,25	2,4	0,1	0,12	0,2	0,17
Unigene0003205	368	368	C	T	SNP	.	13572.2	1|1	0|1	0|1	1|1	0|1	0|1	1|1	1|1	0|1	1|1	0|1	0|1	0|1	1|1	1|1	1|1	0|1	0|1	0|1	1,39	76,8	18,6	0,20	7,5	14,11	0,9	0,15	33,39	0,2	11,13	11,6	12,22	0,99	0,3	0,4	45,42	4,4	20,26
Unigene0003209	207	207	A	G	SNP	.	461.94	.|.	.|.	0|0	.|.	.|.	0|0	1|1	.|.	1|1	1|1	.|.	.|.	1|1	0|1	.|.	.|.	1|1	1|1	.|.	.,.	.,.	1,0	.,.	.,.	3,0	0,1	.,.	0,2	0,2	.,.	.,.	0,1	8,3	.,.	.,.	0,1	0,3	.,.
Unigene0003209	414	414	A	C	SNP	.	400.51	.|.	.|.	1|1	1|1	.|.	1|1	0|0	0|0	.|.	1|1	.|.	.|.	0|0	0|0	0|1	.|.	1|1	0|0	1|1	.,.	.,.	0,3	0,2	.,.	0,1	1,0	2,0	.,.	0,1	.,.	.,.	2,0	6,0	1,1	.,.	0,3	1,0	0,1
Unigene0003216	658	658	T	G	SNP	.	8213.17	.|.	0|1	0|1	1|1	0|1	1|1	1|1	1|1	0|1	0|1	0|1	0|1	0|1	1|1	0|1	1|1	0|1	0|1	0|1	.,.	5,23	8,24	0,3	11,16	0,3	0,15	0,15	8,16	2,14	1,3	5,23	1,9	0,2	1,1	0,6	4,12	1,10	2,10
Unigene0003222	3418	3418	C	T	SNP	.	2483.44	1|1	1|1	0|1	0|1	.|.	1|1	0|1	1|1	1|1	1|1	0|1	1|1	0|0	0|1	0|1	0|1	0|1	0|1	1|1	0,11	0,1	1,4	3,4	.,.	0,1	5,2	0,4	0,6	0,10	3,9	0,1	1,0	1,5	5,3	4,1	2,1	1,2	0,4
Unigene0003225	204	204	C	G	SNP	.	30902.6	0|1	1|1	0|1	0|1	1|1	1|1	0|1	0|1	0|1	1|1	0|1	1|1	1|1	0|1	1|1	0|1	0|1	1|1	0|1	22,46	0,86	23,37	24,77	0,43	0,41	41,56	47,12	10,71	0,29	12,18	0,29	0,30	30,73	0,32	20,32	12,16	0,29	15,20
Unigene0003229	173	173	G	T	SNP	.	2135.08	.|.	1|1	.|.	0|1	1|1	0|1	1|1	.|.	1|1	0|1	1|1	0|1	1|1	0|1	1|1	1|1	1|1	.|.	.|.	.,.	0,3	.,.	4,6	0,1	1,1	0,2	.,.	0,2	1,4	0,1	2,7	0,1	1,12	0,16	0,6	0,1	.,.	.,.
Unigene0003231	78	78	A	G	SNP	.	227.66	0|0	1|1	.|.	.|.	.|.	.|.	.|.	0|0	0|0	.|.	1|1	.|.	1|1	1|1	1|1	1|1	0|0	.|.	0|0	13,0	0,2	.,.	.,.	.,.	.,.	.,.	4,0	3,0	.,.	0,1	.,.	0,1	0,2	0,1	0,1	3,0	.,.	3,0
Unigene0003231	207	207	T	C	SNP	.	3552.69	0|1	1|1	1|1	0|1	0|1	1|1	0|1	0|1	0|1	0|1	1|1	0|1	0|1	1|1	1|1	1|1	0|1	0|1	0|1	25,2	0,5	0,7	2,6	1,4	0,3	2,3	6,1	2,10	2,7	0,12	2,2	1,7	1,15	0,11	0,3	11,3	1,3	4,3
Unigene0003231	220	220	T	A	SNP	.	4757.8	0|1	1|1	0|1	0|1	0|1	1|1	0|1	0|1	0|1	0|1	1|1	0|1	0|1	1|1	1|1	1|1	0|1	1|1	0|1	23,2	0,6	2,9	6,9	1,4	0,8	2,6	7,1	2,12	2,9	0,14	3,2	3,5	1,17	0,17	0,4	10,3	0,3	3,4
Unigene0003231	1836	1836	C	T	SNP	.	3102.04	0|0	0|1	.|.	1|1	0|1	0|1	1|1	0|1	0|1	0|1	1|1	1|1	1|1	1|1	0|1	1|1	0|1	0|1	0|1	21,0	0,9	.,.	0,6	0,9	0,2	0,6	17,2	7,5	0,3	0,3	0,3	0,4	0,14	0,1	0,1	12,7	4,1	6,3
Unigene0003232	420	420	A	G	SNP	.	7823.57	1|1	0|1	1|1	0|1	0|1	1|1	1|1	0|0	0|1	0|1	0|1	0|1	1|1	0|1	0|1	0|1	0|1	1|1	0|1	0,1	11,38	0,23	1,11	3,6	0,6	0,20	5,0	8,16	5,13	18,3	1,4	0,4	4,16	2,5	1,3	6,13	0,5	7,11
Unigene0003232	790	790	T	C	SNP	.	11818	1|1	0|1	1|1	1|1	0|1	0|1	1|1	1|1	1|1	1|1	0|1	0|1	1|1	0|1	1|1	1|1	1|1	1|1	1|1	0,11	15,32	0,12	0,20	4,10	10,11	0,19	0,6	0,23	0,25	7,12	7,6	0,8	17,34	0,12	0,10	0,15	0,11	0,5
Unigene0003232	815	815	A	G	SNP	.	4812.92	1|1	0|1	1|1	1|1	0|1	0|1	1|1	1|1	1|1	1|1	0|1	0|1	1|1	0|1	1|1	1|1	1|1	1|1	1|1	0,4	17,12	0,3	0,9	5,3	10,6	0,6	0,1	0,1	0,15	8,6	4,3	0,8	15,13	0,3	0,1	0,4	0,6	0,3
Unigene0003233	4079	4079	A	C	SNP	.	12520.7	1|1	0|1	0|1	0|1	0|1	1|1	0|1	1|1	1|1	0|1	0|1	0|1	0|1	1|1	1|1	1|1	0|1	0|1	0|1	2,36	21,17	3,13	12,39	2,23	0,13	12,5	0,15	1,26	5,2	9,17	8,18	9,18	1,49	0,6	0,16	7,10	2,6	7,8
Unigene0003237	575	575	A	G	SNP	.	2459.71	1|1	0|1	.|.	0|1	0|1	0|0	1|1	0|0	0|1	1|1	1|1	0|1	0|1	1|1	1|1	1|1	1|1	0|1	1|1	0,7	1,7	.,.	3,4	8,3	32,0	0,3	2,0	2,3	0,2	0,6	13,2	2,2	0,14	0,1	0,1	1,3	1,6	0,3
Unigene0003237	1062	1062	T	G	SNP	.	443.08	.|.	1|1	1|1	1|1	0|0	0|0	.|.	1|1	1|1	1|1	.|.	0|0	.|.	.|.	.|.	.|.	1|1	.|.	.|.	.,.	0,1	0,1	0,2	11,0	33,1	.,.	0,1	0,3	0,1	.,.	8,0	.,.	.,.	.,.	.,.	0,3	.,.	.,.
Unigene0003237	1075	1075	T	C	SNP	.	453.72	.|.	1|1	1|1	1|1	0|0	0|0	.|.	1|1	1|1	1|1	.|.	0|1	.|.	.|.	.|.	.|.	1|1	.|.	.|.	.,.	0,1	0,1	0,2	13,0	35,0	.,.	0,1	0,4	0,1	.,.	10,1	.,.	.,.	.,.	.,.	0,2	.,.	.,.
Unigene0003237	1451	1451	A	G	SNP	.	751.1	0|0	1|1	1|1	0|1	0|1	0|1	1|1	0|0	0|0	1|1	1|1	0|1	.|.	0|1	1|1	.|.	0|1	0|0	0|1	11,0	0,4	0,1	5,1	4,4	24,2	0,1	1,0	1,0	0,1	0,1	7,1	.,.	1,5	0,1	.,.	2,2	1,0	2,1
Unigene0003245	921	921	C	T	SNP	.	3329.27	1|1	0|1	.|.	0|1	0|1	0|1	0|1	1|1	0|1	1|1	1|1	1|1	1|1	1|1	1|1	0|1	1|1	0|1	1|1	0,6	1,7	.,.	5,12	3,3	6,10	4,3	0,3	4,5	0,2	0,4	0,3	0,5	0,12	0,1	1,2	0,2	1,2	0,9
Unigene0003245	1181	1181	A	G	SNP	.	12193.3	0|1	0|1	1|1	0|1	0|1	0|1	1|1	0|1	1|1	0|0	1|1	0|1	1|1	1|1	1|1	1|1	1|1	1|1	1|1	21,6	17,8	0,3	14,26	1,7	10,31	0,19	7,7	0,17	1,0	0,26	6,12	0,28	0,42	0,15	0,7	0,11	0,6	0,65
Unigene0003255	561	561	C	A	SNP	.	2284.55	1|1	0|0	0|0	0|1	0|1	0|1	1|1	1|1	0|0	0|1	0|0	1|1	0|1	0|1	0|1	0|1	1|1	1|1	0|1	0,6	7,0	3,0	6,7	1,2	10,1	1,15	0,1	3,0	2,4	6,0	0,1	3,1	6,8	4,3	2,2	0,4	0,1	2,6
Unigene0003257	177	177	C	G	SNP	.	1668.29	1|1	0|1	.|.	0|1	1|1	1|1	0|1	1|1	1|1	1|1	.|.	.|.	1|1	0|1	1|1	0|0	0|1	1|1	0|1	0,5	1,3	.,.	2,3	0,1	0,4	3,3	0,6	0,3	0,1	.,.	.,.	0,1	5,7	0,2	2,0	3,1	0,3	2,4
Unigene0003260	183	183	C	G	SNP	.	3034.8	1|1	1|1	0|1	0|1	0|1	1|1	0|1	1|1	0|1	0|1	1|1	1|1	.|.	0|1	0|0	1|1	0|1	0|0	1|1	0,1	0,6	1,3	3,8	2,3	0,1	3,6	0,24	2,1	1,4	0,2	0,7	.,.	1,7	2,0	0,4	1,2	1,0	0,3
Unigene0003265	1218	1218	A	T	SNP	.	508.63	0|0	1|1	0|0	1|1	1|1	.|.	0|0	0|0	0|0	0|1	.|.	1|1	0|0	1|1	0|1	1|1	1|1	.|.	.|.	44,0	0,2	15,0	0,1	0,4	.,.	4,0	19,0	10,0	4,1	.,.	0,1	4,0	0,3	3,1	0,1	0,2	.,.	.,.
Unigene0003265	1293	1293	T	G	SNP	.	8373.52	0|1	1|1	0|1	1|1	1|1	1|1	0|1	0|1	0|1	0|1	1|1	1|1	0|1	1|1	0|1	1|1	1|1	1|1	1|1	47,13	0,21	15,5	0,27	0,13	0,7	4,8	16,8	14,14	5,10	0,9	0,13	8,3	0,19	2,7	0,7	0,16	0,13	0,12
Unigene0003268	642	642	A	G	SNP	.	4353.18	1|1	1|1	1|1	1|1	0|1	1|1	1|1	1|1	0|1	0|1	0|1	0|1	0|1	0|1	1|1	1|1	0|1	1|1	1|1	0,10	1,10	0,3	0,11	4,3	0,5	0,8	0,6	2,4	1,7	4,2	4,3	2,5	11,13	1,7	0,5	4,13	0,5	0,4
Unigene0003269	175	175	C	T	SNP	.	7887.83	1|1	0|1	1|1	0|1	0|0	0|1	1|1	1|1	1|1	1|1	0|1	0|1	1|1	1|1	0|1	1|1	1|1	1|1	1|1	0,12	22,19	0,2	14,28	1,0	2,10	0,15	0,2	0,3	0,3	4,14	2,11	0,4	0,27	4,17	0,11	0,14	0,3	0,19
Unigene0003278	170	170	C	T	SNP	.	4199.8	1|1	1|1	0|1	0|1	0|1	1|1	0|1	1|1	0|1	1|1	1|1	0|1	1|1	0|1	1|1	0|1	1|1	1|1	1|1	0,10	0,18	4,9	10,1	5,2	0,7	14,4	0,4	14,12	0,2	0,9	2,2	0,7	16,2	0,4	3,4	0,10	0,1	0,9
Unigene0003278	203	203	A	G	SNP	.	8441.49	1|1	1|1	0|1	0|1	1|1	1|1	0|1	1|1	0|1	1|1	1|1	1|1	1|1	0|1	1|1	0|1	1|1	1|1	1|1	0,15	0,25	9,16	15,12	0,12	0,7	19,7	0,6	3,35	0,4	0,9	0,8	0,11	9,25	0,3	6,5	0,12	0,5	0,14
Unigene0003295	1545	1545	C	G	SNP	.	1693.78	1|1	0|1	0|1	0|1	1|1	0|1	0|1	1|1	1|1	.|.	0|1	0|0	1|1	1|1	0|0	.|.	0|1	.|.	1|1	0,6	3,1	1,2	4,3	0,3	2,2	2,1	0,2	0,10	.,.	1,2	1,0	0,5	0,6	1,0	.,.	2,3	.,.	0,2
Unigene0003300	162	162	A	T	SNP	.	1861.29	.|.	1|1	0|1	0|1	0|1	1|1	0|1	1|1	0|1	1|1	0|0	1|1	0|1	0|1	0|1	1|1	0|1	0|1	0|1	.,.	0,4	14,4	19,3	0,1	0,1	10,2	0,2	3,3	0,1	5,0	0,4	17,8	12,7	0,6	0,1	12,5	13,3	9,5
Unigene0003300	298	298	C	T	SNP	.	29786.6	1|1	1|1	0|1	0|1	1|1	1|1	0|1	1|1	1|1	1|1	0|1	1|1	0|1	0|1	1|1	0|1	0|1	0|1	0|1	0,67	0,85	9,39	23,55	0,33	0,28	13,26	0,66	3,55	0,33	11,29	0,21	18,15	17,53	4,54	3,19	14,26	26,10	7,43
Unigene0003320	1232	1232	C	T	SNP	.	1812.39	1|1	.|.	0|1	.|.	1|1	1|1	0|1	1|1	1|1	1|1	0|1	0|1	1|1	0|1	1|1	0|1	0|1	.|.	.|.	0,7	.,.	4,1	.,.	0,4	0,2	1,7	0,4	0,3	0,2	4,2	1,5	0,2	5,2	0,9	1,1	7,3	.,.	.,.
Unigene0003321	308	308	A	G	SNP	.	2486.88	0|1	0|1	1|1	0|1	1|1	0|1	1|1	0|1	1|1	0|1	1|1	1|1	1|1	0|1	1|1	.|.	0|1	0|1	0|1	4,3	3,1	0,3	2,7	0,3	1,7	0,6	3,1	0,6	2,4	0,4	0,2	0,2	3,3	0,3	.,.	11,6	2,1	4,4
Unigene0003322	151	151	A	G	SNP	.	4095.82	0|1	0|1	.|.	1|1	1|1	.|.	1|1	1|1	0|1	0|1	0|1	0|1	0|0	1|1	0|1	0|1	0|1	0|1	1|1	11,1	14,12	.,.	0,8	0,3	.,.	0,33	0,9	1,1	32,8	6,3	7,3	2,0	0,8	4,7	1,7	1,1	1,6	0,3
Unigene0003322	239	239	A	G	SNP	.	4141.89	0|0	0|1	1|1	0|1	1|1	1|1	0|1	1|1	1|1	0|1	0|1	0|0	1|1	1|1	1|1	.|.	0|1	0|1	1|1	3,0	9,13	0,4	5,1	0,3	0,2	6,16	0,11	0,1	10,33	4,6	1,0	0,2	0,2	0,9	.,.	1,1	3,7	0,2
Unigene0003322	262	262	G	A	SNP	.	4435.76	.|.	0|1	1|1	0|1	0|1	0|1	1|1	0|1	0|0	0|1	1|1	1|1	0|1	0|1	1|1	1|1	1|1	0|1	0|1	.,.	3,16	0,6	1,2	1,4	3,1	2,26	13,4	2,0	18,26	0,10	0,1	2,1	1,2	0,16	0,2	0,3	7,3	1,1
Unigene0003322	672	672	C	T	SNP	.	17242.7	0|1	0|1	0|1	0|1	0|1	0|1	0|1	1|1	1|1	0|1	0|1	0|1	1|1	0|1	1|1	1|1	1|1	1|1	1|1	6,5	63,32	3,6	13,13	3,6	4,4	31,87	0,17	0,10	83105	17,23	5,11	0,6	6,19	0,72	0,31	0,8	0,24	0,10
Unigene0003322	698	698	A	G	SNP	.	19467.6	0|1	0|1	0|1	0|1	0|1	0|1	0|1	1|1	1|1	0|1	0|1	0|1	1|1	0|1	1|1	1|1	1|1	1|1	1|1	14,4	90,38	4,8	18,16	5,11	6,9	38,91	0,28	0,10	139119	19,21	10,10	0,12	10,20	0,79	0,31	0,8	0,33	0,12
Unigene0003324	1261	1261	A	G	SNP	.	1969.87	.|.	0|1	0|1	1|1	1|1	0|1	1|1	.|.	0|1	0|1	0|0	1|1	1|1	1|1	0|1	1|1	0|1	1|1	0|0	.,.	8,7	5,3	0,4	0,2	9,3	0,9	.,.	3,8	2,1	1,0	0,4	0,1	0,6	4,4	0,3	6,4	0,1	19,1
Unigene0003343	773	773	A	G	SNP	.	5638.47	1|1	0|1	0|1	0|1	1|1	0|1	0|1	1|1	1|1	0|1	0|1	0|1	1|1	0|1	0|1	1|1	0|1	1|1	0|1	0,15	11,8	2,12	4,6	0,7	4,10	8,9	1,19	0,4	8,10	3,5	1,3	0,13	3,12	7,9	0,7	3,4	0,2	4,1
Unigene0003343	2199	2199	T	A	SNP	.	1516.74	1|1	0|1	0|1	0|1	0|1	1|1	1|1	1|1	0|1	1|1	0|1	0|1	0|1	0|1	0|0	1|1	0|1	0|0	1|1	0,1	7,6	2,1	1,3	1,5	0,3	0,5	0,2	2,2	0,3	4,4	2,4	3,2	4,1	1,0	0,1	2,4	1,0	0,3
Unigene0003352	354	354	G	T	SNP	.	4206.93	1|1	0|1	.|.	0|1	0|1	1|1	1|1	0|1	0|1	1|1	.|.	0|1	.|.	1|1	0|1	1|1	1|1	1|1	.|.	0,1	1,8	.,.	1,5	4,28	0,3	0,12	14,17	7,7	0,2	.,.	2,26	.,.	0,2	2,1	0,5	0,2	0,5	.,.
Unigene0003352	370	370	A	G	SNP	.	5402.41	1|1	0|1	1|1	0|1	0|1	1|1	1|1	0|1	0|1	1|1	1|1	0|1	.|.	1|1	0|0	0|1	1|1	1|1	1|1	0,1	2,9	0,2	2,11	4,29	0,1	0,9	3,27	9,6	0,2	0,1	3,23	.,.	0,3	2,0	1,3	0,1	0,5	0,2
Unigene0003352	433	433	C	T	SNP	.	1980.62	1|1	0|1	1|1	0|1	0|1	.|.	1|1	0|1	0|1	.|.	1|1	0|1	.|.	1|1	0|0	0|1	.|.	1|1	1|1	0,1	1,3	0,2	2,8	2,9	.,.	0,3	2,10	7,3	.,.	0,1	3,7	.,.	0,2	1,0	1,2	.,.	0,1	0,2
Unigene0003381	45	45	C	T	SNP	.	1430.85	1|1	.|.	0|1	0|1	0|1	0|0	0|1	1|1	.|.	1|1	0|0	1|1	0|0	1|1	0|1	0|0	0|0	1|1	0|0	0,1	.,.	1,2	3,2	0,2	2,0	3,2	0,1	.,.	0,3	1,0	.	1,0	0,1	2,1	3,0	4,0	0,2	2,0
Unigene0003381	803	803	T	C	SNP	.	5686.51	0|1	1|1	1|1	0|1	0|1	0|1	1|1	0|1	1|1	0|1	1|1	1|1	0|1	0|1	0|1	0|1	1|1	1|1	1|1	12,8	0,15	0,5	7,4	4,10	1,2	0,2	5,3	0,16	5,6	0,4	0,6	9,9	9,3	9,1	7,2	0,19	0,4	0,6
Unigene0003381	826	826	C	T	SNP	.	6788.93	0|1	1|1	1|1	0|1	0|1	1|1	1|1	0|0	1|1	0|1	1|1	1|1	0|1	0|1	0|1	0|1	0|1	0|1	0|1	8,12	0,29	0,12	6,5	4,15	0,3	0,6	7,0	0,26	5,7	0,9	0,7	8,14	8,6	5,1	5,2	7,18	1,6	6,6
Unigene0003393	1958	1958	G	T	SNP	.	1190.93	1|1	0|1	1|1	1|1	.|.	0|1	1|1	1|1	1|1	0|0	.|.	.|.	1|1	0|0	.|.	1|1	0|1	.|.	0|1	0,2	4,3	0,3	0,2	.,.	1,1	0,3	0,1	0,1	2,0	.,.	.,.	0,6	3,0	.,.	0,1	1,2	.,.	1,6
Unigene0003396	538	538	A	G	SNP	.	2383.98	1|1	0|0	0|1	0|1	0|1	0|1	0|1	1|1	0|1	.|.	1|1	1|1	1|1	0|1	0|1	0|0	0|1	1|1	0|1	0,8	4,0	14,10	5,4	2,2	1,5	2,2	0,1	7,4	.,.	0,6	0,1	0,6	7,8	3,3	2,0	18,5	0,1	3,3
Unigene0003397	1023	1023	T	C	SNP	.	3565	1|1	0|0	0|1	0|1	0|1	0|1	0|1	1|1	1|1	0|1	0|1	0|1	0|1	1|1	1|1	1|1	1|1	0|1	1|1	0,4	39,0	18,7	28,6	29,6	12,1	23,10	0,11	0,13	48,7	2,6	11,3	13,6	0,10	0,2	0,5	0,9	4,2	0,8
Unigene0003399	2110	2110	G	A	SNP	.	2146.31	0|0	1|1	1|1	0|1	1|1	0|1	0|0	0|0	0|0	1|1	1|1	.|.	0|0	0|0	1|1	0|1	0|1	0|1	0|1	3,0	0,35	0,4	10,2	0,1	1,3	3,0	16,0	1,0	0,4	0,1	.,.	1,0	6,0	0,1	1,1	1,4	6,4	1,7
Unigene0003406	741	741	T	C	SNP	.	581.79	0|0	1|1	1|1	0|0	0|0	1|1	1|1	0|1	0|1	1|1	0|1	0|0	0|0	1|1	1|1	.|.	.|.	1|1	.|.	3,0	0,1	0,2	2,0	5,0	0,1	0,1	2,3	5,1	0,1	3,1	4,0	2,0	0,1	0,6	.,.	.,.	0,1	.,.
Unigene0003408	2022	2022	C	A	SNP	.	874.21	0|1	0|1	0|0	.|.	1|1	0|1	.|.	1|1	1|1	0|1	1|1	.|.	.|.	0|1	1|1	.|.	1|1	0|0	0|1	5,3	1,6	1,0	.,.	0,2	2,1	.,.	0,2	0,1	2,1	0,1	.,.	.,.	3,3	0,1	.,.	0,1	3,0	3,1
Unigene0003408	2025	2025	G	T	SNP	.	937.53	0|1	0|1	0|0	1|1	1|1	0|1	.|.	1|1	1|1	0|1	1|1	.|.	.|.	0|1	1|1	.|.	1|1	0|0	0|1	4,3	1,6	1,0	0,1	0,2	2,1	.,.	0,2	0,1	2,1	0,1	.,.	.,.	3,4	0,1	.,.	0,1	4,0	3,0
Unigene0003421	181	181	A	G	SNP	.	7166.49	.|.	0|1	1|1	0|1	0|1	0|1	1|1	.|.	0|1	1|1	1|1	0|1	1|1	0|1	0|0	.|.	0|1	1|1	0|1	.,.	9,16	1,30	3,33	4,17	2,4	0,4	.,.	3,1	0,2	0,2	15,29	0,14	21,13	2,0	.,.	3,29	0,3	2,10
Unigene0003421	293	293	G	A	SNP	.	8222.07	1|1	0|1	1|1	1|1	0|1	1|1	1|1	0|1	0|1	1|1	1|1	0|1	1|1	0|1	.|.	.|.	1|1	1|1	0|1	0,2	11,14	0,29	2,26	3,14	0,3	0,7	5,7	3,7	0,3	0,2	10,36	0,10	32,13	.,.	.,.	3,41	0,3	2,11
Unigene0003423	151	151	A	C	SNP	.	738.4	0|0	0|1	0|1	0|0	.|.	1|1	1|1	.|.	.|.	1|1	.|.	0|0	1|1	0|0	1|1	1|1	0|1	1|1	0|1	1,0	1,1	2,2	1,0	.,.	0,1	0,1	.,.	.,.	0,3	.,.	1,0	0,2	1,0	0,5	0,4	2,4	0,1	1,3
Unigene0003432	504	504	C	T	SNP	.	983.6	1|1	.|.	.|.	1|1	1|1	.|.	0|1	0|1	1|1	0|1	.|.	1|1	.|.	.|.	.|.	1|1	1|1	.|.	0|1	0,3	.,.	.,.	0,1	0,3	.,.	1,1	1,3	0,2	1,3	.,.	0,2	.,.	.,.	.,.	0,1	0,2	.,.	3,5
Unigene0003433	1676	1676	A	G	SNP	.	1408.01	1|1	0|1	0|1	0|1	0|1	1|1	1|1	1|1	1|1	0|1	0|0	0|1	0|1	0|1	0|1	.|.	.|.	0|0	1|1	0,2	5,9	1,1	1,1	2,1	0,2	0,6	0,4	0,4	1,2	1,0	2,1	2,3	1,1	2,1	.,.	.,.	1,0	0,2
Unigene0003439	475	475	C	T	SNP	.	1541.46	1|1	0|1	1|1	0|1	1|1	0|1	1|1	1|1	1|1	0|1	.|.	1|1	.|.	0|0	1|1	0|1	0|1	1|1	0|1	0,3	4,3	0,4	1,8	0,1	2,2	0,2	0,2	0,8	1,2	.,.	0,2	.,.	4,0	0,1	1,1	3,2	0,1	1,3
Unigene0003439	589	589	A	G	SNP	.	2183.57	0|1	0|1	1|1	0|1	0|1	1|1	0|1	1|1	0|1	0|1	1|1	1|1	1|1	1|1	0|1	1|1	0|1	.|.	1|1	5,10	2,3	0,3	6,8	1,1	0,3	2,3	0,1	3,1	1,3	0,3	0,2	0,1	0,8	1,1	0,2	3,6	.,.	0,5
Unigene0003442	434	434	C	T	SNP	.	21099.9	1|1	0|1	0|1	0|1	0|1	0|1	1|1	1|1	1|1	1|1	1|1	1|1	0|1	1|1	0|1	1|1	1|1	0|1	1|1	0,42	25,45	3,9	43,57	6,4	15,28	0,31	0,11	1,20	0,18	2,26	0,4	13,17	0,57	18,44	0,15	0,36	13,15	0,39
Unigene0003444	118	118	C	T	SNP	.	2829.26	.|.	1|1	0|1	1|1	1|1	0|1	.|.	1|1	0|1	1|1	1|1	1|1	0|1	1|1	0|1	0|0	1|1	1|1	.|.	.,.	0,9	1,3	0,9	0,2	1,1	.,.	0,1	2,8	0,4	0,14	0,1	1,3	0,5	5,3	5,0	0,2	0,4	.,.
Unigene0003444	532	532	C	T	SNP	.	5272.29	1|1	1|1	0|1	0|1	0|1	0|1	0|1	1|1	0|1	0|1	0|1	0|1	1|1	0|1	0|1	0|1	1|1	1|1	1|1	0,8	0,9	3,7	17,5	4,12	3,5	4,2	0,12	5,7	5,6	1,9	2,5	0,11	12,8	2,10	5,8	0,10	0,5	0,1
Unigene0003444	694	694	T	C	SNP	.	3957.01	1|1	1|1	0|1	0|1	0|1	1|1	0|1	1|1	0|1	0|1	0|1	0|1	1|1	0|1	1|1	0|1	0|1	1|1	1|1	0,3	0,6	1,1	7,4	4,10	0,6	3,2	0,7	3,5	4,6	1,5	1,6	0,10	4,8	0,4	1,5	1,8	0,2	0,2
Unigene0003444	1022	1022	T	C	SNP	.	663.3	1|1	0|1	.|.	1|1	1|1	0|1	1|1	0|1	0|0	.|.	0|1	0|1	0|1	0|1	1|1	1|1	0|1	0|0	.|.	0,1	9,4	.,.	0,2	0,2	6,1	0,4	4,2	3,0	.,.	3,2	1,2	3,1	2,1	0,1	0,2	1,2	1,0	.,.
Unigene0003445	591	591	G	A	SNP	.	1990.66	1|1	0|1	0|1	0|1	1|1	0|0	0|1	0|1	0|1	1|1	0|0	0|1	1|1	0|1	1|1	0|0	0|1	1|1	0|1	0,3	3,9	4,2	2,7	0,4	6,0	2,2	1,5	6,2	0,1	4,0	3,3	0,4	6,11	0,1	1,0	1,3	0,2	2,2
Unigene0003445	4829	4829	A	G	SNP	.	923.46	1|1	.|.	1|1	0|1	1|1	0|0	0|1	0|1	0|1	0|0	1|1	1|1	1|1	1|1	1|1	1|1	0|0	.|.	.|.	0,2	.,.	0,2	3,4	0,2	1,0	1,3	1,1	1,1	4,0	0,1	0,1	0,2	0,1	0,2	0,1	1,0	.,.	.,.
Unigene0003445	4832	4832	A	G	SNP	.	923.46	1|1	.|.	1|1	0|1	1|1	0|0	0|1	0|1	0|1	0|0	1|1	1|1	1|1	1|1	1|1	1|1	0|0	.|.	.|.	0,2	.,.	0,2	3,4	0,2	1,0	1,3	1,1	1,1	4,0	0,1	0,1	0,2	0,1	0,2	0,1	1,0	.,.	.,.
Unigene0003446	124	124	C	T	SNP	.	1979.99	0|0	0|1	0|0	0|1	1|1	0|1	.|.	0|0	1|1	1|1	1|1	0|1	1|1	0|1	0|1	1|1	0|1	1|1	0|0	9,0	2,1	1,0	10,2	0,2	1,4	.,.	2,0	0,3	0,9	0,3	1,2	0,5	4,3	2,9	0,4	1,9	0,3	3,0
Unigene0003446	227	227	A	G	SNP	.	1748.86	1|1	1|1	1|1	1|1	0|1	0|1	.|.	1|1	0|1	1|1	.|.	1|1	0|1	1|1	0|1	0|1	0|1	.|.	0|1	0,8	0,3	0,1	0,8	1,2	2,1	.,.	0,1	2,1	0,2	.,.	0,1	3,4	0,6	4,4	1,1	4,3	.,.	2,3
Unigene0003448	205	205	A	G	SNP	.	2434.08	0|0	0|1	1|1	0|1	0|0	1|1	1|1	0|0	0|1	0|0	1|1	0|1	0|0	0|1	0|1	1|1	1|1	.|.	1|1	4,0	2,7	0,3	1,4	1,0	0,2	0,9	1,0	1,6	3,0	0,1	1,6	1,0	4,5	2,5	0,10	0,5	.,.	0,7
Unigene0003448	1150	1150	A	G	SNP	.	2024.15	1|1	0|1	0|1	0|0	0|1	0|1	0|1	1|1	1|1	1|1	0|1	0|0	1|1	0|1	0|0	0|0	0|1	1|1	0|1	0,9	4,3	5,2	10,0	1,2	4,5	3,4	0,9	0,3	0,6	1,1	1,0	0,2	6,1	2,0	3,0	5,5	0,3	3,4
Unigene0003451	596	596	A	G	SNP	.	66221.5	0|1	1|1	1|1	1|1	1|1	1|1	1|1	0|1	0|1	0|1	0|1	0|1	0|1	0|1	1|1	1|1	1|1	1|1	1|1	67,10	0,336	0,85	9193	2,38	0,84	0,278	73,8	25,75	24,74	3,24	6,26	7,56	12110	0,49	0,88	1102	0,56	0,121
Unigene0003452	54	54	G	T	SNP	.	4119.48	0|0	0|1	0|1	1|1	0|1	1|1	0|1	0|1	0|1	0|1	0|1	0|1	1|1	0|1	0|1	1|1	1|1	0|1	1|1	15,0	16,4	4,7	0,13	2,10	0,5	10,13	7,5	13,4	2,6	1,1	3,5	0,3	3,4	1,1	0,6	0,11	1,2	0,17
Unigene0003452	267	267	G	A	SNP	.	3910.41	1|1	1|1	0|1	1|1	1|1	0|1	1|1	1|1	0|1	0|1	0|0	1|1	.|.	0|1	0|1	.|.	1|1	0|1	0|1	0,10	0,11	1,1	0,15	0,3	4,3	0,6	0,13	7,6	1,3	1,0	0,2	.,.	5,11	2,6	.,.	0,3	2,3	3,16
Unigene0003452	1640	1640	A	G	SNP	.	7510.26	0|1	0|1	0|1	0|1	1|1	0|1	0|1	0|1	1|1	0|1	0|1	1|1	1|1	1|1	1|1	0|1	0|1	1|1	0|1	8,12	5,13	2,8	6,13	0,16	2,4	2,6	5,8	0,7	4,11	8,20	0,6	0,9	1,30	0,12	2,6	2,16	0,6	5,9
Unigene0003455	1627	1627	T	C	SNP	.	9555.78	1|1	0|1	1|1	0|1	0|1	0|1	0|1	1|1	1|1	1|1	0|1	0|1	1|1	1|1	1|1	1|1	1|1	1|1	1|1	0,8	20,21	0,12	16,6	4,25	10,3	12,24	0,32	0,8	0,18	10,21	9,21	0,7	0,12	0,8	0,13	1,8	1,3	0,6
Unigene0003457	164	164	A	T	SNP	.	4771.06	1|1	0|1	0|1	0|1	0|1	0|1	1|1	0|1	1|1	0|1	.|.	0|1	1|1	0|1	0|0	1|1	1|1	1|1	1|1	0,4	7,6	3,2	23,17	14,5	20,3	0,16	16,18	0,15	2,1	.,.	34,17	0,8	12,3	2,0	0,12	0,1	0,1	0,3
Unigene0003457	230	230	A	T	SNP	.	6167.15	.|.	1|1	1|1	1|1	1|1	1|1	1|1	0|0	0|1	1|1	1|1	1|1	0|1	1|1	1|1	1|1	.|.	0|0	0|1	.,.	0,6	0,4	0,34	0,29	0,13	0,4	34,0	6,2	0,2	0,1	0,35	1,2	0,10	0,3	0,7	.,.	1,0	1,1
Unigene0003457	394	394	A	G	SNP	.	2203.31	1|1	0|0	0|0	0|1	0|0	0|0	1|1	0|1	1|1	0|1	1|1	0|0	.|.	0|1	0|1	1|1	.|.	.|.	1|1	0,2	4,0	3,0	14,9	18,1	15,1	0,10	10,16	0,3	2,2	0,1	22,1	.,.	4,8	1,1	0,8	.,.	.,.	0,1
Unigene0003457	1078	1078	A	T	SNP	.	1196.41	.|.	0|0	0|0	0|1	0|0	0|0	1|1	0|1	1|1	0|1	1|1	0|1	1|1	0|1	0|1	1|1	1|1	.|.	1|1	.,.	9,0	2,0	27,7	20,1	20,1	0,7	17,3	0,2	1,2	0,1	24,6	0,1	6,1	1,2	0,5	0,1	.,.	0,1
Unigene0003458	890	890	C	A	SNP	.	6661.98	0|1	0|1	1|1	1|1	0|0	1|1	1|1	0|1	0|1	0|1	1|1	0|1	0|1	1|1	0|1	0|1	1|1	1|1	1|1	7,5	16,10	0,8	0,24	3,0	0,3	0,11	14,8	1,7	5,4	0,7	1,3	5,7	0,14	7,3	5,6	0,14	0,3	0,14
Unigene0003458	905	905	G	A	SNP	.	7471.03	0|0	0|1	1|1	1|1	0|1	1|1	1|1	0|1	0|1	0|1	1|1	0|1	0|1	1|1	0|1	0|1	0|1	1|1	0|1	11,0	15,15	0,9	0,31	5,5	0,1	0,13	14,10	1,10	8,4	0,7	1,3	4,12	0,23	7,5	5,7	4,21	0,3	3,17
Unigene0003460	1930	1930	A	G	SNP	.	9770.45	1|1	1|1	1|1	0|1	1|1	1|1	0|1	0|1	0|1	1|1	1|1	1|1	0|1	0|1	1|1	1|1	1|1	1|1	1|1	0,2	0,12	0,18	3,27	0,7	0,6	3,7	2,6	3,13	0,20	0,9	0,9	2,13	8,27	1,21	0,15	0,16	0,14	0,20
Unigene0003463	316	316	T	C	SNP	.	9891.57	1|1	0|1	1|1	1|1	1|1	0|1	1|1	0|1	1|1	1|1	0|1	1|1	0|1	1|1	0|1	0|1	0|1	0|1	0|1	3,40	20,13	0,8	0,20	0,11	2,9	0,14	10,2	1,19	0,12	2,13	0,5	6,10	0,27	14,10	4,10	3,14	1,11	3,17
Unigene0003463	1277	1277	T	G	SNP	.	5678.83	0|1	0|1	1|1	1|1	0|1	1|1	1|1	0|0	0|1	0|1	1|1	0|1	0|1	0|1	1|1	1|1	0|1	0|1	0|1	17,9	8,25	0,3	0,8	1,9	0,4	0,32	24,1	4,3	8,2	0,19	1,3	6,2	7,8	0,2	0,12	3,1	3,1	1,4
Unigene0003464	725	725	T	C	SNP	.	2189.05	1|1	0|1	1|1	0|1	0|0	1|1	0|1	1|1	0|1	1|1	.|.	0|0	0|1	0|1	0|0	0|0	0|1	1|1	0|1	0,9	1,6	0,3	2,4	1,0	0,6	5,4	0,2	8,3	0,8	.,.	1,0	3,2	1,5	1,0	2,0	11,2	0,5	8,3
Unigene0003464	770	770	T	-	Deletion	.	1753.2	0|1	0|1	1|1	0|1	0|1	0|1	0|1	0|1	1|1	0|1	.|.	0|1	1|1	0|1	1|1	0|0	1|1	1|1	0|1	2,6	4,4	0,1	2,3	1,1	1,5	4,1	1,2	0,8	1,3	.,.	2,1	0,2	1,6	0,2	1,0	1,10	0,3	2,5
Unigene0003465	1654	1654	A	G	SNP	.	1721.49	1|1	0|0	.|.	1|1	0|1	1|1	0|1	1|1	0|1	1|1	1|1	0|1	0|0	0|1	1|1	0|1	0|1	0|0	0|1	0,10	3,0	.,.	0,5	1,1	0,1	4,6	0,4	2,1	0,3	0,3	5,1	5,0	3,3	0,2	2,2	4,2	2,0	3,2
Unigene0003467	156	156	T	C	SNP	.	1464.35	0|0	1|1	.|.	0|0	1|1	1|1	0|0	0|0	0|1	1|1	0|1	.|.	1|1	0|1	1|1	1|1	1|1	0|1	1|1	14,0	0,6	.,.	2,0	0,4	0,1	3,0	5,1	1,5	0,2	3,1	.,.	0,1	3,2	0,3	0,1	0,3	2,4	0,8
Unigene0003467	402	402	G	C	SNP	.	1479.86	0|0	1|1	.|.	0|0	.|.	1|1	1|1	0|0	0|1	.|.	1|1	1|1	.|.	0|0	1|1	1|1	1|1	0|1	1|1	55,0	0,4	.,.	17,0	.,.	0,1	0,16	22,0	22,3	.,.	0,7	0,1	.,.	20,0	0,1	0,1	0,1	8,1	0,4
Unigene0003467	667	667	C	T	SNP	.	3003.74	1|1	0|1	0|1	1|1	1|1	1|1	0|1	1|1	0|1	1|1	0|1	0|0	0|1	0|1	0|1	0|0	0|1	0|1	0|1	0,6	23,9	3,9	0,3	0,2	0,1	12,3	0,10	5,6	0,7	4,3	6,0	7,10	14,10	2,1	7,1	18,4	11,3	48,8
Unigene0003473	300	300	A	G	SNP	.	661.68	.|.	0|0	.|.	.|.	.|.	0|0	.|.	1|1	1|1	0|0	1|1	.|.	1|1	0|0	1|1	1|1	0|1	1|1	0|1	.,.	4,0	.,.	.,.	.,.	1,0	.,.	0,2	0,1	1,0	0,5	.,.	0,1	2,0	0,1	0,1	3,5	0,1	2,3
Unigene0003473	361	361	A	G	SNP	.	1180.71	.|.	0|0	0|1	1|1	1|1	.|.	1|1	1|1	0|0	0|1	1|1	1|1	.|.	0|0	1|1	1|1	0|1	1|1	0|1	.,.	2,0	3,2	0,1	0,2	.,.	0,3	0,4	3,0	1,3	0,2	0,1	.,.	2,0	0,2	0,1	5,3	0,2	3,6
Unigene0003473	436	436	A	T	SNP	.	1236.7	1|1	0|0	0|1	1|1	1|1	.|.	.|.	1|1	0|0	0|0	1|1	1|1	.|.	0|0	.|.	.|.	0|0	.|.	.|.	0,9	1,0	5,1	0,5	0,5	.,.	.,.	0,6	1,0	4,0	0,3	0,1	.,.	1,0	.,.	.,.	2,0	.,.	.,.
Unigene0003477	651	651	A	C	SNP	.	910.2	0|0	0|0	1|1	1|1	1|1	0|1	1|1	.|.	0|1	1|1	0|1	1|1	.|.	1|1	0|1	1|1	0|1	0|0	0|1	5,0	12,0	0,5	0,3	0,1	1,1	0,5	.,.	4,1	0,1	1,1	0,2	.,.	0,1	2,1	0,2	7,1	4,0	12,2
Unigene0003477	652	652	T	A	SNP	.	1391.89	1|1	0|1	1|1	1|1	1|1	1|1	1|1	.|.	1|1	1|1	0|1	1|1	.|.	1|1	0|1	1|1	0|1	0|0	0|1	0,5	10,2	0,5	0,2	0,1	0,2	0,3	.,.	0,4	.	1,1	0,1	.,.	0,1	2,1	0,2	7,1	4,0	12,1
Unigene0003477	867	867	C	T	SNP	.	10375.6	1|1	0|1	1|1	1|1	1|1	0|1	1|1	1|1	0|1	1|1	1|1	1|1	0|1	1|1	0|1	0|1	0|1	0|1	0|1	0,1	14,15	0,21	0,19	0,19	3,7	0,29	0,22	4,16	0,23	0,11	0,15	3,10	0,27	4,13	1,5	16,9	9,9	8,13
Unigene0003477	1635	1635	G	A	SNP	.	7307.96	1|1	1|1	1|1	0|1	0|1	1|1	0|1	1|1	1|1	0|1	1|1	0|1	0|1	1|1	1|1	0|1	0|1	1|1	0|1	0,8	0,22	0,17	3,10	4,8	0,7	18,9	0,14	1,14	43,15	0,1	7,12	10,2	0,11	0,12	2,8	9,13	0,6	5,11
Unigene0003478	316	316	A	C	SNP	.	3670.53	1|1	1|1	1|1	0|1	1|1	0|1	1|1	0|1	0|1	0|1	0|1	.|.	0|1	0|1	1|1	1|1	1|1	0|1	1|1	0,8	0,17	0,1	5,12	0,4	2,5	0,8	19,6	2,8	1,2	4,7	.,.	3,2	4,4	0,1	0,3	0,11	1,2	0,3
Unigene0003478	1476	1476	A	G	SNP	.	2788.98	1|1	0|1	1|1	0|1	0|1	1|1	1|1	1|1	0|1	0|1	0|1	0|1	0|0	0|1	0|0	1|1	0|1	0|0	0|1	0,2	14,3	0,3	7,8	2,2	.	0,4	0,12	4,4	3,5	2,7	2,4	8,0	1,6	2,0	0,5	6,3	3,0	1,4
Unigene0003480	186	186	A	G	SNP	.	19336.1	0|1	1|1	0|1	1|1	0|1	1|1	0|1	1|1	0|1	1|1	1|1	0|1	0|1	0|1	0|1	0|1	0|1	0|1	0|1	3,23	0,44	6,20	0,72	18,22	0,22	26,38	3,68	13,17	0,21	0,9	12,23	8,21	24,45	5,12	33,12	14,17	3,17	36,22
Unigene0003480	526	526	A	G	SNP	.	682.72	.|.	1|1	0|1	.|.	0|1	1|1	0|1	1|1	0|0	1|1	1|1	0|0	.|.	0|0	1|1	0|0	0|0	0|0	0|0	.,.	0,6	7,3	.,.	22,3	0,2	11,1	0,1	15,1	0,6	0,3	11,0	.,.	20,2	0,2	6,0	12,0	1,0	28,0
Unigene0003494	212	212	T	C	SNP	.	4897.71	1|1	.|.	1|1	0|1	1|1	1|1	0|1	1|1	1|1	1|1	1|1	.|.	1|1	0|1	1|1	0|1	0|1	1|1	0|1	0,21	.,.	0,1	9,14	0,3	0,7	11,10	0,24	0,16	0,5	0,1	.,.	0,4	11,5	0,1	8,7	13,5	0,1	6,4
Unigene0003494	1561	1561	A	G	SNP	.	27259.1	1|1	0|1	1|1	0|1	0|1	1|1	0|1	1|1	1|1	0|1	0|1	0|1	1|1	0|1	0|1	0|1	0|1	1|1	0|1	0,66	6,45	0,23	25,43	9,26	0,29	9,32	0,68	0,61	13,34	35,22	8,27	0,24	45,48	24,42	13,26	20,36	0,23	23,24
Unigene0003504	135	135	A	C	SNP	.	78592.5	1|1	1|1	0|1	1|1	1|1	0|1	0|1	1|1	0|1	1|1	0|1	1|1	0|1	1|1	0|1	0|1	1|1	0|1	1|1	1223	6217	33131	1,90	2,82	34154	27,69	3119	139,72	3220	7120	2,71	15156	4124	88130	63,24	6136	9,71	5,68
Unigene0003507	2853	2853	C	T	SNP	.	5737.16	0|0	1|1	0|1	0|1	1|1	0|1	0|1	0|1	1|1	0|1	0|1	1|1	1|1	1|1	1|1	1|1	1|1	1|1	0|1	25,0	0,16	6,8	6,5	0,20	2,1	3,10	25,4	0,3	2,8	5,5	0,6	0,4	1,15	0,2	0,7	0,12	0,6	1,7
Unigene0003507	2869	2869	C	T	SNP	.	6770.09	0|0	1|1	0|1	0|1	1|1	0|1	0|1	0|0	1|1	0|1	0|1	1|1	1|1	1|1	1|1	1|1	1|1	1|1	0|1	27,0	0,20	8,14	8,5	0,22	3,1	3,12	33,2	0,8	2,11	4,7	0,6	0,5	1,18	0,6	0,6	0,10	0,5	1,9
Unigene0003507	3132	3132	A	T	SNP	.	4591.71	0|0	1|1	0|1	0|1	1|1	0|1	0|1	0|1	1|1	0|1	1|1	1|1	1|1	1|1	1|1	1|1	1|1	1|1	1|1	17,0	0,13	2,1	10,6	0,10	1,3	3,7	15,2	0,10	3,6	0,3	0,4	0,14	1,13	0,5	0,6	0,10	0,2	0,8
Unigene0003507	3193	3193	A	G	SNP	.	2310.13	1|1	0|1	1|1	0|1	0|1	0|1	1|1	1|1	1|1	0|1	1|1	0|1	0|0	0|1	1|1	1|1	0|1	0|0	0|1	0,2	2,6	0,7	4,9	2,3	4,1	0,5	0,3	0,4	11,1	0,3	2,2	11,1	1,7	0,3	0,3	1,2	2,0	1,2
Unigene0003508	47	47	C	T	SNP	.	1171.07	.|.	1|1	1|1	1|1	1|1	.|.	1|1	0|0	0|0	0|0	.|.	1|1	0|0	0|1	0|1	0|1	0|0	.|.	0|0	.,.	0,3	0,2	0,11	0,3	.,.	0,2	6,0	3,0	1,0	.,.	0,5	1,0	2,3	2,4	1,1	5,0	.,.	15,0
Unigene0003508	951	951	T	G	SNP	.	8083.97	0|0	0|1	0|1	0|0	0|1	1|1	0|1	0|1	1|1	0|1	0|1	0|1	1|1	0|1	1|1	0|1	1|1	.|.	1|1	8,0	2,5	6,9	50,3	11,5	0,11	16,7	39,4	0,19	5,17	1,3	9,10	0,2	3,4	0,9	6,9	1,22	.,.	3,69
Unigene0003513	1835	1835	C	T	SNP	.	597.41	1|1	1|1	.|.	0|1	.|.	.|.	1|1	0|0	.|.	0|0	0|1	1|1	1|1	0|1	1|1	0|0	1|1	.|.	.|.	0,1	0,1	.,.	1,3	.,.	.,.	0,2	2,0	.,.	1,0	2,1	0,1	0,3	1,4	0,2	1,0	0,1	.,.	.,.
Unigene0003513	1989	1989	A	G	SNP	.	1639.34	1|1	0|1	.|.	1|1	1|1	.|.	1|1	.|.	0|0	0|0	0|1	1|1	0|0	1|1	1|1	0|1	0|1	.|.	0|1	0,3	1,4	.,.	0,7	0,4	.,.	0,4	.,.	1,0	11,1	1,3	0,4	2,0	0,5	0,5	1,1	1,4	.,.	2,2
Unigene0003514	76	76	C	T	SNP	.	3750.12	1|1	0|1	1|1	0|1	0|1	0|1	1|1	0|0	0|1	0|1	0|1	1|1	0|1	1|1	0|1	0|1	0|1	0|1	1|1	0,3	2,5	0,3	1,7	1,2	1,8	1,9	1,0	2,7	7,4	3,5	0,7	6,2	1,14	2,5	1,2	3,7	1,3	0,2
Unigene0003517	649	649	G	T	SNP	.	17672.1	1|1	0|1	0|1	0|1	0|1	0|1	0|1	1|1	0|1	1|1	0|1	0|1	0|1	0|1	0|1	0|1	1|1	1|1	1|1	1,26	104,21	17,7	80,33	31,21	14,13	69,29	0,23	24,21	0,55	11,23	13,12	13,33	76,23	74,20	65,14	0,45	0,29	0,61
Unigene0003517	745	745	C	T	SNP	.	849.26	.|.	1|1	.|.	0|1	1|1	.|.	0|1	1|1	.|.	0|1	1|1	1|1	0|0	0|1	1|1	0|1	.|.	1|1	.|.	.,.	0,1	.,.	8,4	0,1	.,.	1,5	0,1	.,.	1,0	0,4	0,1	2,0	1,2	0,1	1,3	.,.	0,1	.,.
Unigene0003517	785	785	A	T	SNP	.	1234.22	.|.	0|0	.|.	1|1	1|1	.|.	1|1	0|1	0|0	1|1	1|1	1|1	1|1	1|1	0|0	0|1	1|1	0|1	1|1	.,.	2,0	.,.	0,6	0,3	.,.	2,5	1,1	1,0	0,1	0,4	0,1	0,6	0,5	3,0	1,3	0,1	2,1	0,2
Unigene0003519	1308	1308	T	C	SNP	.	6698.69	0|1	0|1	1|1	1|1	0|1	0|1	1|1	0|1	0|1	0|1	0|1	0|1	1|1	1|1	0|1	0|1	0|1	1|1	0|1	2,11	14,11	0,2	0,14	1,11	3,5	0,29	6,10	4,28	7,4	3,8	4,7	0,4	0,18	3,1	3,11	4,5	0,6	2,8
Unigene0003520	169	169	A	G	SNP	.	45018.3	1|1	0|1	1|1	1|1	1|1	1|1	1|1	1|1	1|1	0|1	0|1	1|1	0|1	1|1	0|1	0|1	1|1	0|1	1|1	0,62	31,80	0,69	1122	0,49	0,75	1,54	0,54	3,52	36,55	14,70	0,67	12,52	6,86	27,96	11,42	0,41	7,22	0,65
Unigene0003521	398	398	G	T	SNP	.	2477.1	0|1	0|1	0|1	0|1	0|1	1|1	0|1	0|1	1|1	0|1	1|1	0|0	1|1	0|1	.|.	1|1	0|1	1|1	1|1	7,4	9,3	4,1	3,6	1,5	0,6	2,6	8,2	0,2	1,1	0,2	1,0	0,3	2,9	.,.	0,8	2,4	0,1	0,4
Unigene0003521	2305	2305	C	G	SNP	.	2686.22	0|1	0|1	0|1	0|1	.|.	0|1	1|1	0|1	1|1	1|1	0|1	1|1	1|1	0|1	1|1	1|1	0|1	.|.	0|1	15,2	1,1	3,2	6,7	.,.	7,4	0,3	3,2	0,10	0,5	1,1	0,1	0,3	4,10	0,6	0,5	6,6	.,.	1,6
Unigene0003522	657	657	T	C	SNP	.	16732.1	1|1	1|1	0|1	0|1	0|1	1|1	0|1	1|1	0|1	1|1	1|1	0|1	0|1	0|1	0|1	0|1	0|1	1|1	0|1	0,10	0,53	6,8	21,25	22,28	0,16	47,41	0,17	22,6	0,17	0,67	17,22	22,13	14,42	13,22	18,22	13,4	0,9	6,4
Unigene0003522	778	778	C	T	SNP	.	10236.7	1|1	1|1	0|1	0|1	0|1	1|1	0|1	1|1	0|0	0|1	0|1	0|1	0|1	0|1	0|1	0|1	1|1	.|.	1|1	0,2	0,19	1,8	32,21	9,30	0,16	31,35	0,13	16,1	3,10	14,24	4,21	13,3	25,32	12,13	19,11	0,15	.,.	0,9
Unigene0003522	846	846	C	G	SNP	.	5122.33	.|.	1|1	0|1	0|1	1|1	1|1	0|1	.|.	1|1	.|.	1|1	1|1	1|1	0|1	1|1	1|1	0|0	.|.	0|0	.,.	0,6	6,2	3,25	0,8	0,3	10,22	.,.	0,1	.,.	0,18	0,6	0,6	3,25	0,1	0,6	6,0	.,.	1,0
Unigene0003526	53	53	C	T	SNP	.	507.16	1|1	0|1	.|.	1|1	.|.	1|1	.|.	0|1	1|1	.|.	.|.	.|.	0|0	0|0	0|0	.|.	1|1	0|0	1|1	0,1	1,4	.,.	0,1	.,.	0,1	.,.	3,2	0,1	.,.	.,.	.,.	3,0	5,0	.	.,.	0,1	3,0	0,3
Unigene0003529	77	77	A	C	SNP	.	2595.59	.|.	0|1	0|1	0|1	0|0	1|1	0|1	0|0	1|1	1|1	1|1	0|0	1|1	1|1	1|1	1|1	1|1	1|1	1|1	.,.	1,1	2,1	2,3	1,0	0,1	2,5	1,0	0,12	0,1	0,2	1,0	.	0,6	0,7	0,7	0,13	0,1	0,5
Unigene0003529	194	194	C	G	SNP	.	50590.9	1|1	1|1	1|1	1|1	1|1	1|1	0|1	1|1	0|1	1|1	1|1	1|1	1|1	1|1	0|1	0|1	0|1	1|1	0|1	0,66	0,76	0,109	0,94	0,60	0,36	26,77	4,73	27,83	0,58	0,71	0,128	0,55	0,97	28,28	19,80	19,67	0,15	20,50
Unigene0003529	1182	1182	G	A	SNP	.	7761.39	0|0	0|1	1|1	0|1	0|1	1|1	1|1	.|.	1|1	0|0	1|1	0|1	0|0	1|1	1|1	1|1	0|1	0|0	1|1	2,0	1,8	0,17	3,27	1,6	0,5	0,11	.,.	0,18	1,0	0,16	3,13	1,0	0,14	0,40	0,18	1,6	2,0	0,9
Unigene0003533	335	335	G	C	SNP	.	2012.77	1|1	0|1	1|1	1|1	0|1	0|1	0|1	0|1	1|1	0|1	0|1	0|0	1|1	0|1	1|1	0|1	0|1	0|1	0|1	0,1	7,5	0,1	0,2	1,1	1,2	3,4	2,3	0,5	7,6	7,1	1,0	0,5	7,7	0,6	2,2	1,4	1,1	2,1
Unigene0003535	216	216	C	A	SNP	.	896.21	.|.	0|0	0|1	1|1	.|.	1|1	0|1	1|1	0|0	1|1	1|1	.|.	0|0	1|1	0|1	0|0	0|1	0|0	1|1	.,.	1,0	1,4	0,1	.,.	0,4	2,1	0,2	3,0	0,1	0,2	.,.	4,0	0,5	2,1	3,0	2,1	2,0	0,1
Unigene0003539	2618	2618	A	C	SNP	.	2881.56	1|1	0|1	0|1	0|1	1|1	1|1	0|1	1|1	0|1	1|1	0|1	1|1	0|1	0|1	.|.	0|0	0|1	.|.	1|1	0,2	3,11	4,1	9,2	1,6	0,3	5,6	0,5	4,8	0,10	4,1	0,1	2,2	4,11	.,.	1,0	2,3	.,.	1,9
Unigene0003539	2750	2750	A	T	SNP	.	1991.9	1|1	0|1	0|1	0|1	0|1	0|1	0|1	.|.	0|1	1|1	1|1	0|0	1|1	0|1	.|.	1|1	1|1	.|.	0|0	0,1	7,11	3,1	2,7	1,3	3,2	4,5	.,.	5,4	0,2	0,4	1,0	0,10	5,8	.,.	0,1	0,2	.,.	3,0
Unigene0003539	2777	2777	A	C	SNP	.	2248.7	.|.	0|1	0|1	1|1	1|1	1|1	0|1	1|1	1|1	1|1	1|1	0|1	1|1	0|1	.|.	1|1	.|.	.|.	1|1	.,.	3,6	3,1	0,7	0,3	0,3	3,3	0,2	0,10	0,1	0,4	1,1	0,4	4,8	.,.	0,2	.,.	.,.	0,1
Unigene0003539	3094	3094	A	-	Deletion	.	3153.33	1|1	0|1	0|1	0|1	0|1	0|1	0|1	1|1	0|0	1|1	1|1	0|1	1|1	0|1	.|.	1|1	0|1	1|1	0|1	0,5	3,13	2,1	4,5	2,4	2,7	4,8	0,17	11,0	0,2	0,4	1,3	0,4	3,5	.,.	0,3	4,7	0,3	6,8
Unigene0003541	381	381	A	G	SNP	.	538.48	.|.	0|0	0|1	0|1	0|1	.|.	0|0	1|1	0|1	1|1	0|1	0|0	1|1	1|1	1|1	.|.	1|1	.|.	0|0	.,.	7,0	6,2	1,1	12,2	.,.	7,0	0,3	3,1	0,1	1,1	7,0	0,2	0,1	0,1	.,.	0,2	.,.	2,0
Unigene0003541	543	543	T	C	SNP	.	868.76	1|1	0|1	0|1	1|1	0|1	1|1	0|1	1|1	0|1	1|1	0|0	0|1	1|1	0|0	0|0	0|1	0|1	1|1	1|1	0,2	12,1	7,4	0,1	19,4	0,1	10,2	0,3	6,1	0,3	1,0	7,3	0,1	2,0	1,0	1,2	1,1	0,1	0,1
Unigene0003541	781	781	G	T	SNP	.	773.63	.|.	0|0	1|1	.|.	0|1	.|.	.|.	.|.	1|1	1|1	.|.	0|1	.|.	1|1	.|.	.|.	1|1	1|1	.|.	.,.	2,0	0,4	.,.	2,5	.,.	.,.	.,.	0,4	0,2	.,.	4,3	.,.	0,2	.,.	.,.	0,2	0,1	.,.
Unigene0003546	1424	1424	A	C	SNP	.	21119.1	1|1	0|1	0|1	0|1	1|1	1|1	1|1	1|1	0|1	1|1	1|1	1|1	0|1	0|1	0|1	0|1	0|1	0|1	0|1	0,29	25,41	3,34	9,47	0,35	0,30	2,38	0,35	16,36	0,31	2,28	0,30	5,28	6,43	4,14	7,19	13,34	1,11	11,27
Unigene0003549	706	706	C	G	SNP	.	770.17	1|1	0|0	.|.	0|1	.|.	0|1	1|1	.|.	1|1	.|.	.|.	1|1	.|.	0|0	1|1	1|1	0|0	.|.	1|1	0,1	1,0	.,.	4,3	.,.	1,1	0,5	.,.	0,4	.,.	.,.	0,2	.,.	2,0	0,1	0,3	3,0	.,.	0,1
Unigene0003551	843	843	C	T	SNP	.	488.97	0|0	.|.	1|1	1|1	1|1	1|1	.|.	0|0	0|0	0|1	0|0	1|1	1|1	0|1	.|.	1|1	0|1	.|.	0|0	15,0	.,.	0,2	0,3	0,1	0,2	.,.	7,0	10,0	2,1	6,0	0,2	0,1	5,1	.,.	0,2	5,1	.,.	24,0
Unigene0003551	849	849	T	G	SNP	.	388.83	0|0	.|.	1|1	1|1	1|1	1|1	.|.	0|0	0|0	0|0	0|0	1|1	1|1	0|1	.|.	1|1	0|1	.|.	0|0	15,0	.,.	0,1	0,2	0,1	0,1	.,.	7,0	10,0	2,0	6,0	0,1	0,1	3,1	.,.	0,1	4,1	.,.	24,0
Unigene0003552	1549	1549	G	A	SNP	.	11913.8	1|1	0|1	1|1	1|1	1|1	1|1	1|1	1|1	0|1	0|1	0|0	1|1	1|1	1|1	0|1	1|1	0|1	0|1	0|1	0,6	33,45	0,24	0,37	0,25	0,21	0,24	0,4	22,46	13,12	29,0	0,17	0,12	0,26	2,2	0,13	37,3	16,2	18,3
Unigene0003552	3002	3002	C	T	SNP	.	12735	0|1	0|1	1|1	0|1	1|1	0|1	1|1	0|1	0|1	0|1	1|1	1|1	1|1	0|1	1|1	1|1	0|1	0|1	1|1	7,1	6,9	2,36	4,29	1,38	1,12	2,34	1,0	7,20	3,4	0,14	0,43	0,2	3,22	2,56	1,18	4,33	2,17	0,22
Unigene0003558	1046	1046	A	G	SNP	.	709.48	.|.	0|1	0|1	0|0	0|1	.|.	0|0	1|1	0|1	1|1	1|1	1|1	1|1	0|1	0|1	.|.	1|1	0|1	0|1	.,.	1,1	11,2	2,0	6,2	.,.	3,0	0,2	3,2	0,3	0,1	0,3	0,1	4,1	3,3	.,.	0,1	2,1	5,1
Unigene0003558	1243	1243	A	G	SNP	.	2205.41	0|0	1|1	1|1	1|1	0|1	1|1	0|1	0|1	0|1	1|1	0|1	0|1	0|0	0|1	1|1	0|1	0|1	.|.	0|1	1,0	0,1	0,8	0,9	2,7	0,1	5,5	6,2	1,2	0,4	1,4	1,3	2,0	2,3	0,1	2,1	2,3	.,.	1,4
Unigene0003563	212	212	G	A	SNP	.	1078.28	.|.	1|1	.|.	0|0	1|1	1|1	0|1	1|1	0|1	0|1	1|1	1|1	0|0	1|1	0|1	.|.	1|1	0|1	.|.	.,.	0,5	.,.	1,0	0,1	0,2	2,2	0,1	1,1	2,2	0,7	0,3	4,0	0,4	2,1	.,.	0,2	1,1	.,.
Unigene0003563	296	296	T	A	SNP	.	1121.39	.|.	1|1	.|.	1|1	1|1	0|1	1|1	.|.	0|1	1|1	.|.	1|1	1|1	1|1	1|1	.|.	0|1	.|.	0|1	.,.	0,3	.,.	0,3	0,2	1,1	0,1	.,.	1,3	0,2	.,.	0,2	0,2	0,4	0,4	.,.	4,2	.,.	4,1
Unigene0003563	434	434	C	T	SNP	.	1815.74	.|.	1|1	0|1	0|0	1|1	0|0	1|1	.|.	1|1	1|1	1|1	1|1	1|1	.|.	1|1	1|1	1|1	.|.	1|1	.,.	0,1	12,6	29,0	0,4	21,0	0,3	.,.	0,1	0,8	0,6	0,6	0,1	.,.	0,3	0,5	0,1	.,.	0,5
Unigene0003582	714	714	G	T	SNP	.	489.96	.|.	1|1	1|1	0|1	0|1	.|.	0|1	1|1	.|.	.|.	0|1	0|1	1|1	1|1	.|.	0|0	0|0	.|.	1|1	.,.	0,2	0,1	4,2	4,1	.,.	5,2	0,1	.,.	.,.	1,1	3,1	0,2	0,1	.,.	1,0	1,0	.,.	0,1
Unigene0003582	878	878	A	G	SNP	.	840.64	.|.	0|0	1|1	0|1	.|.	0|1	1|1	1|1	1|1	1|1	1|1	0|0	1|1	0|1	1|1	1|1	0|1	1|1	.|.	.,.	3,1	0,2	1,2	.,.	5,1	0,1	0,1	0,4	0,1	0,1	1,0	0,1	1,2	0,1	0,1	4,2	0,2	.,.
Unigene0003584	373	373	A	G	SNP	.	567.51	.|.	0|0	0|0	1|1	0|0	1|1	1|1	1|1	.|.	1|1	1|1	0|0	1|1	0|1	0|0	1|1	0|0	.|.	0|0	.,.	6,0	1,0	0,5	5,0	0,3	0,1	0,1	.,.	0,1	0,1	4,0	0,1	3,2	2,0	0,1	1,0	.,.	1,0
Unigene0003584	418	418	A	G	SNP	.	603.8	1|1	1|1	0|1	0|1	1|1	1|1	1|1	.|.	1|1	0|1	0|0	.|.	1|1	0|0	0|0	.|.	1|1	.|.	1|1	0,1	0,2	1,3	2,2	0,1	0,1	0,1	.,.	0,2	1,1	1,0	.,.	0,1	2,0	1,0	.,.	0,2	.,.	0,2
Unigene0003585	882	882	C	T	SNP	.	4448.01	1|1	1|1	1|1	0|1	0|1	1|1	0|1	0|1	1|1	1|1	0|1	0|1	1|1	1|1	1|1	1|1	0|1	1|1	1|1	0,4	0,13	0,6	1,5	5,2	0,3	6,5	1,3	1,6	0,17	4,6	1,2	0,10	0,4	0,3	0,11	1,4	0,3	0,12
Unigene0003585	1572	1572	A	G	SNP	.	402.57	0|0	1|1	0|1	0|0	0|0	1|1	0|0	.|.	1|1	0|0	0|0	0|0	1|1	0|0	0|0	.|.	1|1	.|.	1|1	4,0	0,3	1,1	2,0	3,0	0,2	4,0	.,.	0,1	4,0	9,0	5,0	0,0	9,0	4,0	.,.	0,1	.,.	0,2
Unigene0003603	758	758	C	T	SNP	.	3375.64	0|1	0|1	1|1	0|1	0|1	1|1	0|1	0|1	1|1	1|1	1|1	1|1	1|1	0|1	0|0	0|1	0|1	1|1	0|0	1,11	8,11	0,4	2,9	1,4	0,6	2,9	2,4	0,4	0,1	0,3	0,3	0,2	4,10	4,0	3,7	2,10	0,1	6,0
Unigene0003603	776	776	A	G	SNP	.	4155.23	0|1	1|1	1|1	0|1	0|1	1|1	0|1	0|1	1|1	1|1	1|1	1|1	1|1	0|1	0|1	1|1	0|1	1|1	0|0	1,12	0,17	0,3	2,7	1,4	0,6	2,5	2,5	0,3	0,1	0,2	0,3	0,2	4,10	3,1	0,10	2,8	0,1	6,0
Unigene0003603	954	954	T	C	SNP	.	3427.94	1|1	0|1	0|1	1|1	1|1	0|1	1|1	1|1	1|1	0|1	1|1	1|1	1|1	1|1	0|0	0|0	0|1	1|1	1|1	0,10	2,10	3,3	0,7	0,4	1,5	0,5	0,10	0,5	1,4	0,5	0,5	0,3	0,6	1,0	1,0	1,9	0,1	0,1
Unigene0003603	2013	2013	T	A	SNP	.	2804.1	1|1	0|1	0|1	0|1	0|1	1|1	0|1	1|1	1|1	1|1	0|1	0|1	0|1	0|1	0|1	0|1	0|1	1|1	1|1	0,17	9,8	3,4	6,1	1,1	0,2	4,2	0,5	0,8	0,4	8,2	4,1	4,5	3,5	5,5	10,1	4,6	0,2	0,2
Unigene0003609	152	152	A	C	SNP	.	12214.6	1|1	0|1	1|1	1|1	0|1	1|1	1|1	1|1	0|1	1|1	1|1	0|1	0|1	0|1	0|1	0|1	1|1	1|1	1|1	0,23	10,30	0,6	0,21	7,7	0,3	0,13	0,32	2,22	0,22	0,12	19,20	8,9	14,23	12,32	4,12	0,13	0,3	0,17
Unigene0003609	805	805	A	C	SNP	.	989.42	1|1	0|0	1|1	1|1	0|0	1|1	0|0	1|1	0|1	1|1	1|1	0|1	0|0	0|1	0|1	0|1	0|0	1|1	0|0	0,3	15,1	0,2	0,2	.	0,2	14,1	0,6	7,1	0,1	0,2	0,1	13,1	0,7	9,1	14,3	9,0	0,2	7,0
Unigene0003609	806	806	G	T	SNP	.	1013.88	1|1	0|0	1|1	1|1	0|0	1|1	0|0	1|1	0|1	1|1	1|1	0|1	0|0	1|1	0|1	0|1	0|0	1|1	0|0	0,3	12,1	.	.	.	0,2	14,1	0,5	6,1	0,1	0,1	.	11,1	0,6	4,1	13,2	6,0	0,1	6,0
Unigene0003613	316	316	A	C	SNP	.	1472.33	0|1	0|0	1|1	0|1	.|.	1|1	1|1	.|.	1|1	.|.	1|1	.|.	1|1	0|1	1|1	1|1	1|1	.|.	1|1	2,2	1,0	0,3	4,4	.,.	0,1	0,2	.,.	0,4	.,.	0,3	.,.	0,4	9,1	0,5	0,1	0,4	.,.	0,7
Unigene0003613	330	330	A	G	SNP	.	977.19	0|1	0|0	1|1	0|1	.|.	1|1	1|1	.|.	0|1	.|.	0|1	1|1	0|1	0|1	0|1	1|1	1|1	1|1	1|1	2,2	1,0	0,3	9,1	.,.	0,2	0,2	.,.	1,3	.,.	1,2	0,1	1,2	9,1	2,2	0,1	0,3	0,1	0,5
Unigene0003621	469	469	C	T	SNP	.	13442.2	.|.	1|1	1|1	1|1	1|1	1|1	0|1	1|1	1|1	1|1	1|1	1|1	0|1	1|1	0|1	0|1	0|1	0|1	1|1	.,.	0,25	0,23	1,26	0,36	0,13	1,7	0,3	0,25	1,30	1,20	0,14	4,25	0,35	2,5	3,3	4,10	1,11	0,4
Unigene0003621	497	497	C	T	SNP	.	12947.5	.|.	1|1	1|1	0|1	1|1	1|1	0|1	1|1	1|1	0|1	0|1	1|1	0|1	1|1	0|1	0|1	0|1	0|1	1|1	.,.	0,22	1,22	4,24	0,28	0,16	1,8	0,3	0,26	6,32	2,22	0,12	4,16	0,32	3,7	4,5	4,10	1,11	0,2
Unigene0003622	554	554	G	A	SNP	.	2894.89	0|0	0|1	0|1	0|1	1|1	0|0	0|1	1|1	1|1	1|1	0|1	1|1	1|1	0|1	0|1	.|.	1|1	.|.	0|1	24,0	8,2	8,4	10,7	0,2	4,0	0,4	0,2	0,3	0,5	11,2	0,4	0,1	18,14	3,10	.,.	0,12	.,.	1,8
Unigene0003622	843	843	A	G	SNP	.	1078.19	0|1	1|1	.|.	1|1	0|1	1|1	0|1	1|1	.|.	0|1	0|1	1|1	.|.	.|.	0|0	1|1	.|.	.|.	0|1	2,1	1,6	.,.	0,8	1,1	0,6	1,2	0,1	.,.	3,2	1,1	0,1	.,.	.,.	3,0	0,1	.,.	.,.	1,1
Unigene0003625	1666	1666	G	A	SNP	.	3358.71	1|1	0|1	0|1	1|1	0|1	0|1	0|1	1|1	0|1	0|1	0|1	0|1	1|1	0|1	0|1	1|1	1|1	1|1	1|1	0,5	2,12	2,5	0,5	1,4	1,5	1,4	1,7	1,2	2,5	3,5	1,7	0,5	4,5	1,5	0,6	0,4	0,2	0,1
Unigene0003625	1700	1700	G	C	SNP	.	3385.3	1|1	0|1	0|1	1|1	0|1	0|1	0|1	0|1	1|1	0|1	0|1	1|1	1|1	0|1	1|1	1|1	1|1	1|1	1|1	0,6	1,11	2,5	0,7	1,2	1,6	1,6	1,4	0,5	2,3	2,4	0,3	0,5	3,5	0,7	0,5	0,5	0,1	0,1
Unigene0003639	392	392	A	C	SNP	.	2027.38	0|0	0|1	.|.	0|1	.|.	0|0	0|1	0|0	0|1	1|1	1|1	0|0	0|1	0|1	0|0	1|1	1|1	1|1	1|1	3,0	2,3	.,.	1,6	.,.	1,0	1,7	1,0	3,5	0,2	0,2	1,0	1,3	5,10	8,0	0,2	0,2	0,4	0,9
Unigene0003649	123	123	A	G	SNP	.	4154.15	0|1	0|1	1|1	0|1	0|1	0|1	1|1	0|1	0|1	0|1	0|1	0|1	1|1	0|1	1|1	1|1	1|1	0|1	1|1	5,5	2,9	0,3	2,7	2,10	5,13	0,10	6,6	2,5	1,1	1,4	1,4	0,2	5,18	0,4	0,3	0,3	2,1	0,6
Unigene0003649	226	226	A	G	SNP	.	1284.43	1|1	1|1	.|.	0|1	1|1	.|.	0|1	1|1	1|1	.|.	1|1	1|1	.|.	0|1	0|1	.|.	0|1	1|1	1|1	0,2	0,4	.,.	2,4	0,2	.,.	1,3	0,3	0,2	.,.	0,2	0,3	.,.	1,7	2,1	.,.	5,2	0,1	0,1
Unigene0003664	25	25	G	A	SNP	.	1094.36	.|.	0|1	1|1	.|.	1|1	.|.	1|1	.|.	0|1	1|1	1|1	.|.	0|1	0|1	0|1	.|.	0|1	1|1	0|1	.,.	5,1	0,1	.,.	0,1	.,.	0,4	.,.	3,1	0,5	0,3	.,.	3,2	1,2	3,3	.,.	4,1	0,2	2,3
Unigene0003664	140	140	A	G	SNP	.	5462.82	1|1	0|1	1|1	1|1	1|1	1|1	1|1	1|1	0|1	1|1	1|1	1|1	0|1	1|1	0|1	1|1	0|1	1|1	0|1	0,2	5,8	0,5	0,7	0,7	0,4	0,22	0,2	3,9	0,15	0,8	0,5	2,5	0,9	5,7	0,3	2,10	0,2	1,2
Unigene0003664	213	213	A	G	SNP	.	534.36	.|.	0|0	1|1	0|1	1|1	1|1	0|0	.|.	.|.	.|.	0|1	0|1	1|1	0|1	1|1	1|1	0|0	1|1	.|.	.,.	1,0	0,2	2,2	0,1	0,1	4,0	.,.	.,.	.,.	2,3	1,1	0,1	1,1	0,1	0,2	3,0	0,1	.,.
Unigene0003664	427	427	T	G	SNP	.	926.88	0|1	1|1	1|1	0|0	.|.	1|1	0|1	0|0	0|1	0|1	0|1	0|1	1|1	0|0	1|1	0|0	0|0	1|1	.|.	2,1	0,1	0,2	3,0	.,.	0,1	3,1	3,0	1,2	2,3	2,4	1,2	0,3	3,0	0,3	4,0	4,0	0,3	.,.
Unigene0003671	1955	1955	C	T	SNP	.	1288.8	0|1	1|1	0|1	0|0	0|0	0|0	0|0	0|1	1|1	1|1	1|1	0|0	0|1	0|0	.|.	0|0	1|1	1|1	1|1	13,2	0,9	5,1	11,1	4,0	2,0	11,0	8,4	0,2	0,1	0,3	2,0	2,4	14,0	.,.	2,0	0,8	0,3	0,2
Unigene0003671	1970	1970	C	T	SNP	.	1617.9	0|1	1|1	0|0	0|0	0|0	0|0	0|1	0|1	1|1	1|1	1|1	0|0	0|1	0|1	.|.	0|0	1|1	0|1	1|1	10,1	0,9	5,0	11,0	3,0	2,0	4,3	8,3	0,1	.	0,4	2,0	2,3	6,8	.,.	2,0	0,5	2,2	0,2
Unigene0003672	719	719	G	A	SNP	.	1102.51	0|0	0|1	1|1	1|1	0|1	1|1	0|0	1|1	0|1	0|0	.|.	1|1	0|1	1|1	.|.	0|0	1|1	0|1	1|1	1,0	3,2	0,4	0,3	1,2	0,4	1,0	0,1	3,4	2,0	.,.	0,2	2,1	0,2	.,.	1,0	0,3	1,1	0,1
Unigene0003676	163	163	T	-	Deletion	.	3298.19	1|1	0|1	0|1	0|1	1|1	0|1	0|1	1|1	0|1	1|1	0|1	1|1	0|1	0|1	0|1	0|1	0|1	0|1	1|1	0,10	3,9	2,1	1,7	0,4	1,1	1,5	0,1	6,12	0,4	3,8	0,9	2,4	3,5	2,10	1,7	2,4	1,1	0,1
Unigene0003676	1244	1244	A	G	SNP	.	2814.25	1|1	0|1	1|1	0|1	1|1	0|1	1|1	.|.	0|1	1|1	1|1	1|1	0|1	0|1	1|1	1|1	1|1	1|1	1|1	0,6	1,5	0,2	3,11	0,3	2,1	0,3	.,.	1,11	0,3	0,4	0,8	1,3	1,11	0,2	0,4	0,1	0,1	0,2
Unigene0003676	1293	1293	C	T	SNP	.	437.21	.|.	0|1	.|.	0|1	1|1	0|1	1|1	.|.	0|1	.|.	1|1	1|1	0|0	0|1	0|0	1|1	0|0	.|.	1|1	.,.	2,1	.,.	2,1	0,1	3,1	0,1	.,.	1,2	.,.	0,1	0,1	1,0	1,2	1,0	0,1	1,0	.,.	0,1
Unigene0003679	569	569	G	T	SNP	.	29074.8	0|1	0|1	0|1	1|1	0|1	0|1	1|1	1|1	0|1	0|1	0|1	1|1	1|1	0|1	0|1	1|1	1|1	0|1	1|1	13,45	9,57	3,25	5,70	3,25	10,31	1,46	2,53	6,33	5,42	3,35	1,28	2,31	8,63	2,26	1,39	1,49	4,18	1,47
Unigene0003679	840	840	A	T	SNP	.	12006.4	1|1	0|1	0|1	0|1	1|1	0|1	0|1	1|1	1|1	1|1	1|1	0|1	0|1	0|1	0|1	0|1	0|1	0|1	0|1	0,19	3,23	6,7	6,31	0,7	2,15	2,18	2,17	0,8	1,25	1,14	3,18	3,12	5,27	4,8	5,10	2,9	1,5	3,18
Unigene0003691	1690	1690	A	G	SNP	.	4990.29	0|1	0|1	1|1	0|1	1|1	0|1	0|1	1|1	1|1	0|1	1|1	0|1	0|0	1|1	1|1	1|1	0|1	1|1	0|1	14,6	2,17	0,5	14,2	0,3	2,4	5,1	0,20	0,6	16,9	0,11	4,6	1,0	0,4	0,9	0,1	9,7	0,5	2,9
Unigene0003691	1789	1789	A	G	SNP	.	1108.5	1|1	1|1	0|0	0|1	0|0	1|1	.|.	.|.	.|.	1|1	1|1	0|1	.|.	.|.	0|1	0|1	1|1	0|0	1|1	0,3	0,1	2,0	1,4	1,0	0,2	.,.	.,.	.,.	0,5	0,2	1,3	.,.	.,.	1,4	1,2	0,2	1,0	0,2
Unigene0003691	1825	1825	C	G	SNP	.	1280.11	.|.	0|0	0|1	0|1	1|1	.|.	0|1	.|.	1|1	0|0	0|0	0|1	1|1	1|1	0|1	0|1	1|1	1|1	0|0	.,.	2,0	1,6	1,2	0,4	.,.	4,3	.,.	0,1	2,0	5,0	2,6	0,3	0,3	5,2	3,1	0,3	0,2	1,0
Unigene0003694	407	407	T	C	SNP	.	1426.68	1|1	0|0	0|1	0|1	0|1	0|1	1|1	1|1	1|1	0|1	1|1	0|0	0|1	1|1	0|1	1|1	1|1	0|1	1|1	0,2	10,0	4,4	3,1	3,1	1,2	0,5	0,1	0,1	1,1	0,6	5,1	5,3	0,3	2,1	0,2	0,6	4,1	0,1
Unigene0003694	844	844	G	A	SNP	.	1842.17	0|1	0|1	0|1	0|1	0|1	0|1	.|.	0|1	1|1	0|1	0|1	0|1	0|1	1|1	1|1	1|1	1|1	0|1	1|1	1,2	6,1	2,1	5,3	4,1	2,4	.,.	2,3	0,6	3,1	5,3	5,3	5,2	0,7	0,3	0,2	0,7	3,2	0,1
Unigene0003708	532	534	CGG	-	Deletion	.	1001.39	.|.	0|1	1|1	1|1	1|1	.|.	1|1	0|0	0|1	0|0	1|1	1|1	1|1	1|1	1|1	.|.	1|1	.|.	1|1	.,.	13,2	0,4	0,1	0,1	.,.	0,4	3,0	1,5	14,0	0,1	0,1	0,3	0,1	0,1	.,.	0,2	.,.	0,1
Unigene0003708	916	916	C	T	SNP	.	3212.51	1|1	1|1	0|1	0|1	0|1	0|1	0|0	1|1	0|1	1|1	1|1	0|0	0|1	0|1	0|1	0|1	1|1	1|1	0|1	0,4	0,11	8,7	8,1	1,6	4,1	26,2	0,3	23,16	0,6	0,12	2,0	39,6	5,5	12,1	6,3	0,2	0,5	3,5
Unigene0003709	2610	2610	G	A	SNP	.	5527.37	0|0	0|1	0|1	1|1	0|1	0|1	0|1	0|1	1|1	1|1	0|1	0|1	0|1	1|1	1|1	0|1	0|1	1|1	1|1	14,1	4,21	2,3	0,5	3,14	2,8	2,14	5,14	0,19	0,4	6,3	1,1	6,24	0,6	0,1	1,5	1,8	0,3	0,5
Unigene0003711	220	220	A	G	SNP	.	487.09	1|1	0|0	0|0	0|1	.|.	0|1	1|1	1|1	1|1	0|0	0|0	1|1	1|1	0|0	.|.	0|1	.|.	0|0	0|0	0,2	5,0	3,0	2,2	.,.	1,1	0,2	0,1	0,1	1,0	7,0	0,1	0,1	1,0	.,.	4,3	.,.	1,0	1,0
Unigene0003722	3234	3234	C	T	SNP	.	2834.49	0|1	0|1	0|1	0|1	0|1	0|1	0|1	0|1	1|1	1|1	1|1	0|1	0|0	0|1	1|1	0|0	1|1	1|1	1|1	3,5	4,6	1,6	2,4	2,1	2,1	2,4	8,3	0,2	0,2	0,4	1,4	2,0	3,16	0,3	2,0	0,9	0,1	0,7
Unigene0003726	311	311	G	T	SNP	.	5366.57	1|1	0|1	1|1	1|1	1|1	0|1	1|1	1|1	0|1	1|1	1|1	1|1	0|1	0|0	1|1	1|1	1|1	0|0	0|1	0,5	1,11	0,2	0,26	0,2	2,2	0,5	0,1	2,4	0,20	0,5	0,5	1,8	1,0	0,10	0,3	0,9	3,0	2,3
Unigene0003726	2890	2890	C	T	SNP	.	694.92	0|1	0|1	0|1	0|0	.|.	0|1	0|0	0|0	0|0	1|1	0|0	.|.	1|1	1|1	1|1	.|.	0|0	1|1	1|1	2,1	5,1	6,3	6,0	.,.	3,1	1,0	1,0	1,0	0,3	2,0	.,.	0,5	0,4	0,2	.,.	1,0	0,1	0,1
Unigene0003726	2975	2975	C	T	SNP	.	621.11	0|1	.|.	1|1	0|1	0|0	1|1	0|0	0|0	0|1	1|1	1|1	0|1	.|.	0|0	.|.	0|0	1|1	1|1	.|.	5,2	.,.	0,1	3,5	3,0	0,1	1,0	4,0	2,2	0,2	0,1	1,2	.,.	2,0	.,.	1,0	0,2	0,1	.,.
Unigene0003726	3021	3021	A	T	SNP	.	2871.54	0|1	1|1	0|1	0|1	0|1	1|1	0|1	1|1	0|1	0|1	1|1	1|1	0|1	0|1	.|.	0|1	0|1	0|0	1|1	1,8	0,3	1,1	1,9	1,6	0,3	1,2	0,7	1,8	1,2	0,2	0,4	1,3	2,4	.,.	2,1	1,4	1,0	0,4
Unigene0003730	2798	2798	T	-	Deletion	.	469.22	.|.	0|0	0|1	0|1	0|0	0|0	1|1	.|.	.|.	1|1	0|1	0|0	0|0	1|1	1|1	.|.	1|1	.|.	1|1	.,.	5,0	6,1	5,1	1,0	2,0	0,1	.,.	.,.	0,5	3,2	7,0	4,0	0,2	0,2	.,.	0,1	.,.	0,2
Unigene0003733	1823	1823	T	G	SNP	.	23557.6	1|1	1|1	0|1	0|1	0|1	0|1	1|1	1|1	0|1	1|1	0|1	0|1	0|1	0|1	0|1	1|1	0|1	1|1	0|1	3,38	4,59	7,37	14,45	14,34	13,42	1,31	0,22	18,61	1,39	10,18	8,16	7,31	9,46	2,10	0,16	10,39	0,21	9,49
Unigene0003742	28	28	C	A	SNP	.	647.26	0|0	0|1	1|1	0|1	.|.	1|1	1|1	.|.	1|1	0|0	.|.	1|1	1|1	1|1	.|.	0|0	0|1	.|.	0|0	1,0	10,1	0,1	2,1	.,.	0,1	0,5	.,.	0,3	1,0	.,.	0,1	0,1	0,3	.,.	1,0	3,1	.,.	6,0
Unigene0003743	406	406	T	C	SNP	.	4818.23	1|1	0|1	1|1	0|1	0|1	0|0	1|1	1|1	1|1	0|1	0|1	1|1	0|1	1|1	0|1	1|1	0|0	1|1	0|0	0,15	3,7	0,3	2,19	2,3	1,0	0,8	0,9	0,13	1,9	2,17	0,1	2,8	0,10	1,4	0,2	6,0	0,3	1,0
Unigene0003743	424	424	A	T	SNP	.	4765.63	1|1	0|1	0|0	0|1	0|1	0|0	1|1	1|1	0|1	0|1	1|1	0|1	0|1	0|1	0|1	1|1	0|1	0|1	1|1	0,18	7,5	2,0	3,17	3,7	3,0	0,10	0,4	1,13	9,5	2,17	2,1	1,8	2,13	2,7	0,1	6,7	1,1	0,1
Unigene0003746	1537	1537	A	-	Deletion	.	12854	1|1	0|1	0|1	0|1	1|1	0|1	0|1	1|1	0|1	0|1	0|1	1|1	0|1	0|1	1|1	1|1	0|1	0|1	0|1	0,22	37,24	30,12	104,47	1,17	31,28	12,25	0,9	5,24	9,4	24,28	0,23	11,20	72,44	0,25	0,14	36,13	3,4	24,8
Unigene0003748	1536	1536	A	G	SNP	.	599.66	1|1	0|1	0|1	0|0	0|1	.|.	0|0	1|1	1|1	1|1	0|0	0|0	1|1	0|1	0|1	.|.	0|1	1|1	0|0	0,2	2,2	3,1	1,0	3,2	.,.	6,0	0,1	0,3	0,1	1,0	1,0	0,2	1,1	1,1	.,.	8,1	0,3	1,0
Unigene0003770	71	71	A	G	SNP	.	787	0|0	0|1	0|1	0|1	1|1	1|1	1|1	1|1	0|1	1|1	0|1	0|1	0|1	0|1	1|1	0|0	0|1	.|.	0|0	4,0	1,2	1,2	3,1	0,1	0,1	0,2	0,1	1,2	0,2	1,1	1,1	1,1	5,5	0,2	1,0	1,1	.,.	1,0
Unigene0003770	491	491	T	C	SNP	.	6474.02	1|1	0|1	0|1	0|1	0|1	0|1	0|1	1|1	1|1	0|1	0|1	0|1	0|1	0|1	0|1	1|1	1|1	0|1	1|1	0,16	7,16	3,6	3,12	1,4	5,8	1,7	0,15	0,10	1,10	6,1	1,6	6,6	7,12	3,7	0,4	0,11	1,3	0,17
Unigene0003770	546	546	A	G	SNP	.	6436.24	0|1	0|1	0|1	1|1	1|1	0|1	1|1	0|1	0|1	0|1	0|1	1|1	0|1	0|1	1|1	1|1	0|1	1|1	0|1	9,6	3,14	1,7	0,26	0,6	9,5	0,10	10,10	2,5	9,6	1,12	0,3	5,11	6,15	0,13	1,6	3,5	0,2	6,6
Unigene0003774	114	114	A	G	SNP	.	463.3	0|0	.|.	0|0	1|1	.|.	0|0	1|1	0|0	1|1	0|0	1|1	.|.	1|1	0|1	1|1	1|1	0|0	0|1	0|0	10,0	.,.	7,0	0,1	.,.	14,0	0,2	21,0	.	20,0	.	.,.	.	18,1	.	.	25,0	9,0	12,0
Unigene0003774	133	133	C	A	SNP	.	1549.91	0|1	1|1	0|0	1|1	.|.	0|1	1|1	0|0	1|1	0|1	1|1	1|1	1|1	0|1	1|1	1|1	0|0	0|1	0|0	11,1	0,4	8,0	0,5	.,.	18,4	0,5	21,0	0,2	28,3	0,3	0,3	0,1	24,8	0,6	0,1	27,0	11,3	14,1
Unigene0003775	1058	1058	T	G	SNP	.	1690.31	1|1	0|0	1|1	1|1	1|1	.|.	1|1	1|1	0|0	1|1	1|1	1|1	.|.	.|.	0|1	1|1	0|1	.|.	0|1	0,4	10,0	0,2	0,3	0,1	.,.	0,2	0,7	4,0	0,1	0,1	0,2	.,.	.,.	4,3	0,1	2,4	.,.	11,13
Unigene0003785	94	94	A	G	SNP	.	1699.1	1|1	.|.	0|1	0|1	1|1	0|0	0|1	0|1	0|1	0|0	0|0	1|1	0|1	0|1	1|1	1|1	1|1	.|.	0|1	0,1	.,.	3,2	13,1	0,4	9,0	1,7	1,2	6,6	4,0	5,0	0,1	4,7	7,3	0,10	0,2	0,3	.,.	1,4
Unigene0003785	299	299	G	A	SNP	.	2468.55	1|1	1|1	0|0	0|1	1|1	0|0	1|1	0|1	0|1	0|0	0|0	0|1	0|1	0|1	1|1	1|1	1|1	0|0	1|1	0,5	0,4	6,0	7,7	0,1	33,0	0,10	1,7	6,3	17,1	14,0	1,1	11,1	10,8	0,5	0,2	0,4	4,0	0,4
Unigene0003785	302	302	G	A	SNP	.	2351.4	1|1	1|1	0|0	0|1	1|1	0|0	1|1	0|1	0|1	0|0	0|0	0|1	0|0	0|1	1|1	1|1	1|1	0|0	1|1	0,4	0,4	6,0	7,7	0,1	34,0	0,10	1,7	6,3	17,1	14,0	1,1	11,0	9,6	0,4	0,2	0,4	4,0	0,4
Unigene0003785	365	365	A	G	SNP	.	3056.54	.|.	1|1	0|1	0|1	0|1	0|0	1|1	.|.	0|0	0|0	0|1	0|0	0|0	0|1	1|1	1|1	1|1	0|1	1|1	.,.	0,9	5,2	19,13	2,2	18,1	0,11	.,.	9,0	16,0	12,2	4,0	7,0	8,14	0,3	0,1	0,3	4,3	0,10
Unigene0003785	380	380	C	A	SNP	.	3546.83	.|.	1|1	0|1	0|1	0|1	0|0	1|1	.|.	0|0	0|0	0|1	0|1	0|0	0|1	1|1	1|1	1|1	0|1	1|1	.,.	0,13	4,2	18,17	2,2	19,1	0,12	.,.	9,0	14,0	12,2	5,1	9,0	9,16	0,5	0,1	0,3	4,3	0,12
Unigene0003785	1912	1912	C	G	SNP	.	12251.7	1|1	1|1	1|1	0|1	1|1	1|1	0|1	1|1	1|1	1|1	1|1	1|1	1|1	0|1	1|1	1|1	0|1	0|1	0|1	0,1	0,15	0,13	8,23	0,29	0,12	9,61	0,3	0,16	0,12	0,14	0,4	0,5	7,25	0,6	0,17	2,11	4,7	1,19
Unigene0003785	1983	1983	A	G	SNP	.	3742.72	.|.	1|1	1|1	0|1	1|1	.|.	0|1	.|.	.|.	1|1	.|.	1|1	.|.	0|1	.|.	1|1	0|0	0|1	0|1	.,.	0,13	0,12	24,14	0,7	.,.	25,30	.,.	.,.	0,4	.,.	0,2	.,.	20,17	.,.	0,6	7,0	10,1	10,4
Unigene0003790	684	684	T	A	SNP	.	21715	1|1	1|1	1|1	0|1	1|1	1|1	1|1	0|1	0|1	0|1	1|1	1|1	0|1	1|1	0|1	0|1	0|1	0|1	0|1	0,9	0,69	0,53	6,9	1,56	0,8	6,70	19,45	52,28	12,67	0,26	0,22	6,4	0,14	5,16	6,16	5,17	1,9	14,50
Unigene0003790	1404	1404	A	G	SNP	.	5559.52	1|1	0|1	0|1	0|1	0|1	0|1	0|1	1|1	1|1	1|1	0|1	0|1	0|1	0|1	1|1	0|1	0|1	1|1	0|1	0,6	22,17	6,5	4,4	11,2	1,5	10,6	0,22	1,38	0,9	15,2	10,2	4,3	2,4	0,4	5,5	7,2	0,7	6,7
Unigene0003796	370	370	A	G	SNP	.	939.8	1|1	1|1	0|1	0|1	0|0	0|1	0|1	.|.	0|1	1|1	.|.	0|0	1|1	0|1	1|1	0|1	1|1	.|.	1|1	0,4	0,3	3,1	8,1	5,0	2,2	1,2	.,.	2,4	0,1	.,.	4,0	0,2	2,2	0,1	1,1	0,1	.,.	0,3
Unigene0003804	461	461	G	T	SNP	.	2331.37	1|1	0|1	0|1	0|1	0|1	0|1	0|1	1|1	0|1	1|1	1|1	0|1	1|1	1|1	1|1	1|1	0|1	1|1	0|1	0,7	6,7	1,1	1,1	1,2	2,3	5,8	0,2	4,5	0,4	0,1	1,1	0,1	0,12	0,3	0,1	4,3	0,1	3,4
Unigene0003804	585	585	G	T	SNP	.	682.38	.|.	0|0	0|1	1|1	0|1	.|.	0|1	1|1	0|1	.|.	.|.	.|.	1|1	1|1	1|1	1|1	0|1	1|1	0|1	.,.	3,0	2,3	0,2	1,2	.,.	1,1	0,1	2,3	.,.	.,.	.,.	0,1	0,1	0,1	0,2	3,1	0,1	2,1
Unigene0003811	406	406	A	G	SNP	.	864.04	.|.	.|.	0|0	1|1	0|0	0|1	.|.	1|1	1|1	0|0	1|1	0|0	.|.	0|0	1|1	1|1	0|1	.|.	0|1	.,.	.,.	1,0	0,12	1,0	2,2	.,.	0,1	0,1	1,0	0,1	1,0	.,.	6,0	0,4	0,2	4,1	.,.	3,1
Unigene0003816	237	237	G	T	SNP	.	5033.86	0|1	0|1	0|1	1|1	1|1	0|1	0|1	0|1	0|1	0|1	1|1	1|1	0|1	0|1	1|1	1|1	0|1	0|1	0|1	7,10	9,7	1,9	0,11	0,19	5,8	3,12	14,9	4,4	4,8	0,7	1,13	6,5	8,15	0,2	0,6	4,9	1,2	8,7
Unigene0003823	1510	1510	C	T	SNP	.	3399.05	0|0	1|1	1|1	0|1	0|1	1|1	0|1	0|0	0|1	1|1	0|1	1|1	0|1	0|1	0|1	0|1	0|1	.|.	1|1	4,0	0,7	0,6	5,10	1,2	0,7	4,2	3,0	4,5	0,5	1,12	0,5	7,6	4,13	3,1	1,3	2,7	.,.	0,10
Unigene0003827	537	537	C	G	SNP	.	8276.11	0|1	1|1	1|1	0|1	1|1	1|1	0|1	0|1	0|1	0|1	1|1	1|1	0|1	1|1	1|1	0|1	0|1	1|1	0|1	17,3	0,25	0,9	5,23	0,32	0,3	1,6	6,5	6,12	7,11	0,11	0,27	4,11	0,16	0,9	3,4	3,3	0,14	5,9
Unigene0003827	815	815	A	G	SNP	.	1163	1|1	0|0	0|0	0|1	0|0	1|1	0|1	1|1	0|1	1|1	0|1	0|0	0|0	0|1	.|.	.|.	1|1	0|0	1|1	0,6	9,0	9,0	1,3	3,0	0,2	8,1	0,2	31,6	0,1	5,2	2,0	2,0	4,3	.,.	.,.	0,5	2,0	0,4
Unigene0003835	2588	2588	A	C	SNP	.	4083.45	0|1	0|1	1|1	0|1	1|1	1|1	0|1	0|1	0|1	1|1	1|1	1|1	0|1	0|1	0|1	0|0	0|1	0|0	0|1	5,2	4,14	0,8	9,2	0,6	0,15	4,2	12,1	5,5	0,11	0,9	0,9	2,5	5,12	2,6	4,0	3,2	1,0	3,5
Unigene0003848	40	40	C	A	SNP	.	1897.44	1|1	0|1	1|1	1|1	.|.	1|1	0|1	1|1	0|1	1|1	1|1	1|1	0|1	0|1	0|1	0|1	0|0	.|.	0|1	0,5	2,2	0,4	0,1	.,.	0,1	1,4	0,3	1,3	0,6	.	0,1	1,4	4,1	3,2	1,1	2,0	.,.	1,3
Unigene0003850	154	154	A	G	SNP	.	4070.17	0|1	1|1	1|1	0|1	0|1	0|1	1|1	0|1	0|1	0|1	1|1	0|1	0|0	1|1	1|1	0|1	0|1	0|0	0|1	1,4	1,18	1,6	1,3	3,3	2,2	1,21	8,5	2,7	4,3	0,17	1,2	7,0	1,14	0,6	1,1	4,3	2,0	11,4
Unigene0003850	368	368	A	T	SNP	.	1523.28	1|1	1|1	0|1	0|1	1|1	1|1	0|1	1|1	1|1	1|1	1|1	1|1	1|1	0|1	0|1	0|0	0|0	0|0	0|1	0,3	0,4	2,2	2,1	0,1	0,5	5,2	0,4	0,1	0,3	0,4	0,1	0,2	4,6	1,1	1,0	1,0	1,0	2,4
Unigene0003850	1037	1037	G	T	SNP	.	1709.93	1|1	0|1	0|1	1|1	.|.	0|1	0|1	1|1	.|.	0|1	1|1	1|1	0|0	1|1	0|1	0|1	0|1	0|1	0|0	0,3	2,8	1,2	0,4	.,.	1,1	4,1	0,1	.,.	3,2	0,5	0,2	1,0	0,4	1,9	1,3	1,4	5,1	3,0
Unigene0003854	955	955	G	T	SNP	.	4588.09	0|0	0|0	.|.	1|1	.|.	0|1	1|1	.|.	0|1	1|1	1|1	.|.	0|1	0|0	0|0	0|0	1|1	0|1	1|1	.	2,0	.,.	0,9	.,.	2,5	0,7	.,.	2,23	0,3	0,7	.,.	2,9	3,0	1,0	1,0	0,13	0,8	0,41
Unigene0003858	184	184	C	T	SNP	.	1793.4	1|1	0|1	1|1	0|1	0|0	0|1	0|1	1|1	0|1	0|1	.|.	1|1	0|1	1|1	1|1	1|1	0|1	.|.	0|1	0,2	2,7	0,2	1,5	1,0	1,6	1,5	0,3	1,4	1,1	.,.	0,3	2,1	0,3	0,2	0,1	4,1	.,.	3,2
Unigene0003858	2000	2000	G	T	SNP	.	405.81	1|1	0|0	1|1	0|0	.|.	1|1	0|1	1|1	0|0	.|.	0|1	1|1	0|1	.|.	0|0	.|.	0|0	1|1	0|1	0,2	2,0	0,1	1,0	.,.	0,1	1,2	0,1	2,0	.,.	1,1	0,1	1,1	.,.	4,0	.,.	1,0	0,2	1,1
Unigene0003859	139	139	G	T	SNP	.	4657.38	1|1	0|1	1|1	1|1	1|1	0|1	1|1	.|.	.|.	.|.	1|1	1|1	1|1	1|1	0|1	.|.	0|1	.|.	0|1	0,5	1,5	0,5	0,25	0,1	1,9	0,2	.,.	.,.	.,.	0,4	0,8	0,3	1,21	1,11	.,.	1,10	.,.	2,15
Unigene0003859	1476	1476	G	A	SNP	.	12014.4	1|1	0|1	0|1	0|1	0|0	0|1	1|1	1|1	1|1	.|.	0|1	0|1	1|1	1|1	1|1	1|1	0|1	.|.	0|1	0,35	4,27	4,10	40,33	2,0	9,11	1,8	0,2	0,16	.,.	1,1	4,5	0,16	2,57	0,18	0,4	8,25	.,.	26,50
Unigene0003859	1564	1564	C	G	SNP	.	7872.98	1|1	0|1	1|1	1|1	1|1	0|1	1|1	1|1	0|1	.|.	1|1	1|1	0|1	0|1	0|1	0|0	1|1	.|.	1|1	0,6	12,11	0,4	0,19	0,4	3,10	0,8	0,2	17,14	.,.	0,3	0,3	9,6	8,18	2,10	2,0	0,36	.,.	0,55
Unigene0003859	1602	1602	C	T	SNP	.	4721.71	1|1	0|1	1|1	1|1	1|1	0|1	1|1	1|1	0|1	.|.	1|1	1|1	0|1	0|1	0|1	0|0	1|1	1|1	1|1	0,8	10,7	0,3	0,1	0,3	2,5	0,8	0,1	13,11	.,.	0,2	0,2	5,5	7,12	2,8	1,0	0,23	0,1	0,35
Unigene0003859	1683	1683	C	T	SNP	.	5826.83	1|1	1|1	0|1	1|1	0|1	0|1	1|1	1|1	0|1	.|.	0|1	0|0	1|1	1|1	1|1	1|1	0|1	1|1	0|1	0,15	0,14	3,1	0,15	2,2	5,4	0,10	0,5	10,6	.,.	3,5	3,0	0,5	0,17	0,18	0,4	8,13	0,1	25,20
Unigene0003864	201	201	C	T	SNP	.	5855.26	0|1	1|1	0|1	1|1	0|1	1|1	0|1	0|1	0|1	1|1	1|1	0|1	0|1	0|1	0|1	0|1	0|1	1|1	0|1	4,1	0,10	3,11	0,13	12,11	0,8	5,8	4,8	14,17	0,10	0,17	7,4	2,9	12,8	1,2	6,2	4,3	0,5	12,7
Unigene0003864	2170	2170	T	C	SNP	.	11188.7	1|1	0|1	1|1	0|1	0|1	0|1	1|1	0|1	1|1	0|1	0|1	0|1	1|1	1|1	.|.	1|1	1|1	1|1	1|1	1,14	16,13	0,15	5,21	5,15	5,3	0,34	18,7	0,44	4,9	7,10	3,8	0,10	0,22	.,.	0,15	0,14	0,12	0,49
Unigene0003864	2371	2371	A	C	SNP	.	3535.19	1|1	0|1	1|1	0|1	0|1	1|1	1|1	1|1	1|1	0|1	1|1	0|1	1|1	0|1	1|1	1|1	0|1	0|0	0|1	0,5	3,3	0,4	4,9	2,4	0,7	0,4	0,9	0,9	10,1	0,3	2,1	0,8	3,4	0,1	0,3	3,4	1,0	4,15
Unigene0003866	1208	1208	T	C	SNP	.	923.59	1|1	0|1	0|1	0|0	1|1	0|0	0|0	1|1	0|0	0|1	0|1	1|1	1|1	1|1	0|0	0|0	0|1	0|0	0|0	0,7	1,4	2,2	6,0	0,1	7,0	.	0,3	1,0	1,2	4,1	0,2	0,2	0,2	15,0	2,0	1,1	1,0	1,0
Unigene0003866	1274	1274	G	T	SNP	.	1613.04	1|1	0|1	0|1	0|1	.|.	0|0	1|1	1|1	0|1	0|1	0|1	1|1	.|.	1|1	0|1	1|1	0|1	0|0	0|1	0,3	1,3	1,3	4,3	.,.	7,0	0,5	0,3	1,3	2,8	5,1	0,1	.,.	0,6	8,2	0,2	4,1	2,0	1,2
Unigene0003868	383	383	A	G	SNP	.	3061.16	0|1	0|1	1|1	0|1	1|1	1|1	0|1	0|1	0|0	.|.	1|1	0|0	0|1	1|1	1|1	.|.	0|1	0|1	1|1	9,3	3,3	0,3	11,7	0,2	0,9	6,6	6,3	5,0	.,.	0,11	3,0	1,7	1,16	0,11	.,.	1,3	1,2	0,3
Unigene0003869	99	99	T	C	SNP	.	2442.72	1|1	0|1	1|1	0|1	1|1	0|1	1|1	1|1	1|1	1|1	0|1	1|1	0|1	0|1	0|1	1|1	1|1	0|1	1|1	0,4	16,6	0,4	3,4	0,5	4,2	0,5	0,4	0,1	0,2	2,3	0,3	1,2	3,4	2,1	0,3	0,7	2,1	0,6
Unigene0003869	210	210	C	T	SNP	.	9847.24	1|1	0|1	1|1	0|1	1|1	1|1	1|1	1|1	1|1	0|1	1|1	1|1	1|1	0|1	1|1	1|1	0|1	1|1	0|1	0,18	10,33	0,11	4,13	0,19	0,11	0,26	0,11	0,17	5,17	0,11	0,5	0,10	3,20	0,16	0,9	4,14	0,3	2,13
Unigene0003870	546	546	A	G	SNP	.	4367.48	0|0	1|1	0|1	1|1	0|1	0|1	1|1	1|1	0|1	0|1	1|1	0|1	0|1	0|1	1|1	1|1	0|1	0|1	0|1	9,0	0,18	4,8	0,4	4,7	1,4	0,9	1,8	1,4	3,5	0,12	2,4	1,10	4,8	0,5	0,4	6,9	1,3	1,1
Unigene0003873	391	391	T	C	SNP	.	23893.1	0|1	0|1	0|1	0|1	1|1	1|1	0|1	0|1	0|1	1|1	0|1	1|1	0|1	1|1	0|1	1|1	0|1	0|1	0|1	38,57	12,56	7,34	21,42	0,37	1,29	15,33	14,65	23,20	0,61	16,21	0,32	10,29	0,50	11,25	0,37	9,19	3,21	14,27
Unigene0003874	695	695	C	-	Deletion	.	1217.89	0|1	0|1	1|1	1|1	0|0	1|1	0|1	0|0	1|1	0|1	0|1	0|1	0|0	1|1	0|1	0|0	1|1	0|0	1|1	4,1	1,9	0,2	0,2	3,0	0,1	3,9	9,0	0,2	22,4	1,2	6,1	2,0	0,3	2,1	12,1	0,1	1,0	0,1
Unigene0003877	1102	1102	C	T	SNP	.	858.76	0|1	0|1	.|.	0|1	0|1	0|1	0|1	1|1	0|0	0|1	0|0	0|1	1|1	0|1	1|1	0|1	1|1	1|1	1|1	2,1	6,2	.,.	5,3	10,2	4,1	5,2	0,1	11,0	7,1	3,0	3,2	0,3	8,5	0,1	1,1	0,1	0,1	0,5
Unigene0003878	289	289	A	C	SNP	.	4369.53	0|1	1|1	1|1	0|1	1|1	1|1	1|1	0|1	0|0	0|1	0|1	1|1	1|1	0|1	0|1	1|1	0|1	0|1	0|1	13,13	0,6	0,3	7,18	0,3	0,1	1,16	4,10	1,0	2,6	5,3	0,3	0,5	4,8	8,6	0,2	8,7	1,2	2,5
Unigene0003878	587	587	A	G	SNP	.	746.74	1|1	.|.	.|.	0|1	1|1	0|0	1|1	1|1	0|0	0|0	1|1	.|.	.|.	1|1	1|1	1|1	0|0	1|1	0|0	0,2	.,.	.,.	4,4	0,1	4,0	0,3	0,1	3,0	9,0	0,2	.,.	.,.	0,2	0,1	0,2	2,0	0,1	2,0
Unigene0003878	620	620	A	G	SNP	.	772.84	0|0	.|.	.|.	0|1	.|.	1|1	0|0	1|1	1|1	1|1	.|.	.|.	.|.	0|0	.|.	0|0	1|1	0|0	1|1	2,0	.,.	.,.	2,4	.,.	0,3	4,0	0,1	0,2	0,8	.,.	.,.	.,.	1,0	.,.	1,0	0,3	1,0	0,2
Unigene0003885	1279	1279	-	G	Insertion	.	3285.71	1|1	0|1	0|1	1|1	0|1	1|1	0|1	0|1	0|1	1|1	1|1	0|1	0|1	0|1	1|1	0|1	1|1	0|0	1|1	0,4	7,17	2,7	0,4	2,4	0,3	5,12	3,2	3,4	0,3	0,10	2,4	4,2	1,10	0,2	2,4	0,3	3,0	0,4
Unigene0003888	2414	2415	CC	-	Deletion	.	6395.28	1|1	0|1	1|1	1|1	0|1	1|1	1|1	1|1	1|1	1|1	0|1	0|1	1|1	1|1	1|1	1|1	0|1	0|1	0|1	0,9	9,10	0,6	0,12	5,7	0,6	0,11	0,16	0,12	0,2	8,7	3,7	0,3	0,12	0,2	0,2	3,9	6,4	9,16
Unigene0003889	482	482	G	A	SNP	.	11206.1	1|1	0|1	1|1	0|1	0|1	0|1	0|1	1|1	0|1	0|1	1|1	1|1	0|0	0|1	0|1	0|0	0|1	1|1	0|1	0,45	3,23	0,8	7,15	0,6	1,2	1,8	0,20	2,21	3,0	0,12	0,14	3,0	4,4	0,7	2,0	4,22	0,2	8,56
Unigene0003889	485	485	A	G	SNP	.	11307	1|1	0|1	1|1	0|1	0|1	0|1	0|1	1|1	0|1	0|1	1|1	1|1	0|0	0|1	0|1	0|0	0|1	1|1	0|1	1,47	4,21	0,8	7,15	1,6	1,2	2,8	0,20	3,20	3,1	0,13	0,14	4,0	4,7	1,7	3,0	4,21	0,3	11,55
Unigene0003891	302	302	T	C	SNP	.	4145	1|1	0|1	1|1	1|1	0|1	1|1	0|1	1|1	0|1	1|1	1|1	0|1	0|1	0|1	0|1	0|1	0|1	1|1	0|1	0,10	3,9	0,11	0,12	3,4	0,3	2,5	0,7	5,1	0,4	0,7	1,4	2,10	4,5	5,4	2,3	2,4	0,1	4,5
Unigene0003893	220	220	T	G	SNP	.	856.21	1|1	0|0	0|1	0|1	.|.	1|1	0|0	1|1	0|0	.|.	1|1	0|1	0|1	1|1	0|1	1|1	0|1	0|0	0|1	0,4	7,0	1,1	8,3	.,.	0,1	2,0	0,1	3,0	.,.	0,2	2,1	3,1	0,2	3,1	0,2	3,5	1,0	2,2
Unigene0003893	497	497	C	T	SNP	.	2544.39	1|1	0|1	0|1	1|1	1|1	0|1	1|1	1|1	1|1	0|1	1|1	1|1	1|1	0|1	0|1	1|1	0|1	1|1	0|1	0,4	9,10	1,3	0,8	0,1	2,1	0,3	0,4	0,5	1,1	0,3	0,2	0,7	10,3	2,6	0,1	2,3	0,2	3,5
Unigene0003909	448	448	A	C	SNP	.	34981.5	0|1	1|1	0|1	0|1	1|1	0|1	0|1	0|0	1|1	1|1	0|1	1|1	1|1	0|1	0|1	0|1	0|1	1|1	0|1	33,30	0,164	2,22	47,41	0,22	14,50	15,19	29,0	0,58	0,164	28,67	0,11	0,37	6,56	31,32	33,39	30,12	0,46	64,48
Unigene0003914	321	321	G	A	SNP	.	4293.5	1|1	1|1	0|1	0|1	0|0	0|1	1|1	.|.	.|.	.|.	1|1	0|1	.|.	0|1	1|1	1|1	0|0	.|.	0|0	0,9	.	1,1	52,60	2,0	48,8	0,3	.,.	.,.	.,.	0,1	1,0	.,.	15,12	0,6	0,4	9,0	.,.	20,0
Unigene0003917	85	85	C	T	SNP	.	2701.91	0|0	0|1	1|1	0|1	0|1	1|1	1|1	1|1	0|0	0|1	0|1	0|1	0|1	1|1	1|1	0|0	0|1	0|1	0|1	9,0	2,3	0,2	5,10	3,2	0,3	0,3	0,2	2,0	1,9	2,2	4,4	2,3	0,15	0,3	2,0	6,6	1,1	6,4
Unigene0003917	919	919	C	T	SNP	.	6775.23	1|1	1|1	0|1	1|1	0|1	1|1	0|1	1|1	0|1	1|1	0|1	0|1	1|1	0|1	1|1	0|1	0|1	1|1	0|1	0,8	2,32	2,4	1,18	5,6	0,7	7,6	0,19	8,16	0,9	1,6	6,8	0,4	8,12	0,5	1,9	2,10	0,2	8,9
Unigene0003922	1560	1560	T	C	SNP	.	1999.9	0|0	0|0	0|1	1|1	0|1	0|0	1|1	0|0	0|0	0|0	0|1	0|1	1|1	0|1	1|1	1|1	1|1	.|.	.|.	22,0	4,0	9,1	0,3	7,13	1,0	0,8	39,0	8,0	5,0	12,3	9,10	0,2	6,7	0,2	0,5	0,6	.,.	.,.
Unigene0003922	1611	1611	C	T	SNP	.	5592.53	0|1	0|1	0|1	1|1	0|1	0|1	1|1	0|1	0|1	0|1	0|1	0|1	1|1	0|1	1|1	1|1	1|1	1|1	1|1	10,9	3,5	9,7	0,14	7,13	1,2	0,14	24,16	5,8	3,2	12,5	8,9	0,8	7,12	0,1	0,4	0,15	0,6	0,8
Unigene0003926	393	393	C	T	SNP	.	522.33	1|1	1|1	.|.	.|.	.|.	0|0	0|1	.|.	1|1	.|.	.|.	.|.	1|1	0|0	1|1	0|0	1|1	1|1	0|0	0,1	0,4	.,.	.,.	.,.	1,0	1,1	.,.	0,2	.,.	.,.	.,.	0,2	2,0	0,1	1,0	0,1	0,3	2,0
Unigene0003953	491	491	G	A	SNP	.	1360.41	0|1	0|0	0|0	0|0	0|1	1|1	0|0	0|1	0|0	1|1	.|.	0|1	1|1	0|1	1|1	0|1	1|1	1|1	1|1	1,4	1,0	1,0	8,0	1,2	0,4	6,0	8,4	4,0	0,2	.,.	2,4	0,6	17,7	0,1	2,1	0,4	0,3	0,1
Unigene0003956	51	51	T	C	SNP	.	334.19	0|0	0|0	.|.	.|.	.|.	.|.	0|0	0|0	.|.	1|1	.|.	1|1	1|1	.|.	.|.	1|1	1|1	.|.	1|1	1,0	1,0	.,.	.,.	.,.	.,.	1,0	3,0	.,.	0,1	.,.	0,3	0,1	.,.	.,.	0,1	0,3	.,.	0,1
Unigene0003976	713	713	C	T	SNP	.	461.05	0|0	0|1	0|0	1|1	0|0	.|.	1|1	.|.	0|0	1|1	.|.	0|1	1|1	1|1	.|.	.|.	0|1	.|.	1|1	1,0	1,3	2,0	0,3	1,0	.,.	0,1	.,.	2,0	0,1	.,.	2,1	0,1	0,1	.,.	.,.	1,1	.,.	0,2
Unigene0003984	321	321	A	G	SNP	.	3756.11	0|1	1|1	1|1	0|1	0|1	1|1	1|1	1|1	1|1	.|.	1|1	0|1	.|.	1|1	.|.	.|.	0|0	0|0	0|0	10,8	0,13	0,4	17,4	1,6	0,3	0,1	0,2	0,18	.,.	0,3	8,10	.,.	0,30	.,.	.,.	48,0	4,0	21,0
Unigene0003984	774	774	G	A	SNP	.	5556.06	0|1	0|0	0|0	0|1	1|1	0|0	0|0	0|1	0|1	1|1	0|0	1|1	.|.	1|1	.|.	.|.	1|1	.|.	1|1	15,19	24,0	21,0	19,21	0,8	26,0	1,0	4,6	28,4	0,1	6,0	0,3	.,.	0,3	.,.	.,.	0,62	.,.	0,10
Unigene0003984	987	987	A	G	SNP	.	6535.96	1|1	0|1	0|1	0|1	1|1	0|0	1|1	1|1	0|1	.|.	0|1	1|1	0|0	1|1	1|1	1|1	1|1	.|.	1|1	0,30	36,7	23,3	13,28	0,6	27,2	0,1	0,13	51,13	.,.	12,2	0,6	1,0	0,10	0,6	0,1	0,47	.,.	0,7
Unigene0003984	1177	1177	A	G	SNP	.	3222.94	1|1	1|1	1|1	0|1	0|1	1|1	1|1	0|0	1|1	1|1	.|.	0|1	.|.	1|1	1|1	1|1	0|0	0|0	0|1	0,24	0,7	0,14	43,12	7,2	0,6	0,4	7,0	0,1	.	.,.	4,1	.,.	0,1	0,2	0,2	78,0	2,0	15,2
Unigene0003984	1403	1403	A	G	SNP	.	2545.2	0|1	1|1	1|1	0|0	0|1	1|1	1|1	1|1	0|1	0|0	0|0	0|1	1|1	0|1	1|1	.|.	0|1	.|.	0|0	18,2	0,1	0,15	23,1	8,2	0,2	0,8	1,6	9,4	1,0	1,0	11,2	0,3	4,24	0,6	.,.	33,6	.,.	15,1
Unigene0003984	1438	1438	A	G	SNP	.	987.89	1|1	1|1	.|.	0|0	.|.	1|1	.|.	.|.	1|1	.|.	1|1	0|0	.|.	1|1	.|.	.|.	0|0	.|.	.|.	0,1	0,6	.,.	1,0	.,.	0,2	.,.	.,.	0,8	.,.	0,7	1,0	.,.	0,2	.,.	.,.	3,0	.,.	.,.
Unigene0003995	598	598	A	G	SNP	.	21783.6	1|1	0|1	1|1	1|1	0|1	0|1	0|1	1|1	0|1	1|1	0|1	0|1	1|1	1|1	0|1	0|1	1|1	0|1	1|1	0,23	13,60	0,19	0,42	13,23	5,33	15,24	0,28	15,43	0,35	3,28	3,17	0,30	0,51	5,24	9,17	0,39	7,11	0,43
Unigene0004006	2437	2437	T	C	SNP	.	991.64	0|1	1|1	0|1	0|0	0|1	0|1	0|1	0|1	1|1	0|0	0|1	1|1	1|1	0|1	0|0	0|1	1|1	0|1	1|1	1,2	0,4	4,2	1,0	2,1	2,1	3,3	4,1	0,3	2,0	5,2	0,1	0,4	1,1	2,0	2,1	0,3	1,1	0,1
Unigene0004008	714	714	C	G	SNP	.	1899.86	0|1	0|1	1|1	0|1	0|1	0|1	1|1	1|1	0|1	.|.	1|1	0|0	1|1	0|1	1|1	1|1	1|1	1|1	1|1	7,2	5,3	0,1	2,6	2,3	2,2	0,6	0,1	4,4	.,.	0,7	1,0	0,1	7,2	0,2	0,1	0,6	0,3	0,3
Unigene0004008	804	804	A	G	SNP	.	698	0|0	0|1	.|.	0|1	0|1	0|1	1|1	0|0	0|1	.|.	.|.	.|.	1|1	0|0	1|1	1|1	1|1	1|1	1|1	9,0	6,3	.,.	1,1	2,1	4,1	0,2	2,0	1,2	.,.	.,.	.,.	0,1	7,0	0,2	0,1	0,2	0,1	0,4
Unigene0004028	1057	1057	A	G	SNP	.	454.8	1|1	0|0	0|0	1|1	1|1	0|0	1|1	.|.	0|0	.|.	0|1	0|1	0|0	.|.	.|.	.|.	1|1	.|.	1|1	0,2	3,0	1,0	0,3	0,1	6,0	0,1	.,.	1,0	.,.	1,1	1,0	1,0	.,.	.,.	.,.	0,1	.,.	0,2
Unigene0004028	1063	1063	T	C	SNP	.	451.28	1|1	0|0	0|0	1|1	1|1	0|0	.|.	.|.	0|0	.|.	0|1	0|1	0|0	1|1	.|.	.|.	1|1	.|.	1|1	0,2	4,0	1,0	0,3	0,1	6,0	.,.	.,.	1,0	.,.	1,1	1,1	1,0	0,1	.,.	.,.	0,1	.,.	0,1
Unigene0004032	1347	1347	T	A	SNP	.	2319.95	.|.	1|1	0|0	.|.	.|.	0|1	.|.	.|.	0|0	1|1	.|.	.|.	1|1	0|0	1|1	1|1	1|1	1|1	1|1	.,.	0,15	1,0	.,.	.,.	2,5	.,.	.,.	17,0	0,4	.,.	.,.	0,14	4,0	0,2	0,8	0,2	0,2	0,3
Unigene0004032	1360	1360	C	A	SNP	.	2262.68	.|.	1|1	0|0	.|.	.|.	0|1	.|.	.|.	0|0	1|1	.|.	.|.	1|1	0|0	1|1	1|1	1|1	1|1	1|1	.,.	0,15	1,0	.,.	.,.	2,6	.,.	.,.	20,0	0,4	.,.	.,.	0,12	4,0	0,1	0,7	0,2	0,3	0,1
Unigene0004032	1833	1833	C	T	SNP	.	2642.7	.|.	1|1	0|0	.|.	.|.	0|1	.|.	.|.	0|1	1|1	.|.	.|.	1|1	0|0	1|1	1|1	1|1	1|1	1|1	.,.	0,15	2,0	.,.	.,.	7,2	.,.	.,.	13,2	0,11	.,.	.,.	0,21	10,0	0,1	0,2	0,4	0,4	0,4
Unigene0004032	3551	3551	T	C	SNP	.	1521.49	.|.	1|1	0|0	.|.	.|.	0|1	.|.	.|.	0|0	1|1	.|.	.|.	1|1	0|0	.|.	1|1	1|1	1|1	1|1	.,.	0,9	4,0	.,.	.,.	1,3	.,.	.,.	18,1	0,3	.,.	.,.	0,18	8,0	.,.	0,4	0,1	0,1	0,5
Unigene0004032	4938	4938	-	C	Insertion	.	1739.31	.|.	1|1	0|0	.|.	.|.	0|1	.|.	.|.	0|1	1|1	.|.	.|.	1|1	0|0	1|1	1|1	1|1	1|1	1|1	.,.	0,14	6,0	.,.	.,.	8,6	.,.	.,.	19,2	0,2	.,.	.,.	0,17	9,0	0,6	0,1	0,7	0,1	0,3
Unigene0004037	462	462	A	G	SNP	.	2076.43	0|0	0|1	0|0	0|1	0|1	1|1	0|1	0|0	1|1	.|.	1|1	1|1	1|1	0|1	1|1	1|1	1|1	1|1	1|1	2,0	2,5	2,0	2,2	1,2	0,5	1,2	1,0	0,3	.,.	0,2	0,2	0,3	3,4	0,1	0,2	1,7	0,3	0,13
Unigene0004041	925	925	C	T	SNP	.	37128.1	1|1	0|1	1|1	0|1	0|1	0|1	0|1	1|1	1|1	1|1	1|1	0|1	0|1	0|1	0|1	0|1	1|1	1|1	1|1	0,79	27104	0,34	33,84	12,32	12,42	23,35	0,79	5,54	0,60	0,45	9,21	9,47	12,94	9,26	18,30	0,49	0,34	0,54
Unigene0004041	1537	1537	T	C	SNP	.	8816.75	1|1	0|1	0|1	0|1	0|1	0|1	0|1	1|1	1|1	1|1	0|1	0|1	0|1	0|1	1|1	0|1	1|1	0|1	0|1	0,17	37,14	7,7	11,41	9,9	9,1	22,16	0,8	1,18	0,31	18,9	8,4	9,8	36,11	0,4	2,4	2,20	3,14	5,16
Unigene0004046	298	298	C	-	Deletion	.	1078.31	1|1	1|1	0|0	1|1	1|1	0|1	1|1	1|1	.|.	.|.	1|1	.|.	1|1	0|1	1|1	.|.	0|0	.|.	0|0	0,4	0,3	3,0	0,2	0,4	5,2	0,3	0,6	.,.	.,.	0,6	.,.	0,1	4,1	0,1	.,.	2,0	.,.	5,0
Unigene0004067	184	184	A	T	SNP	.	2213.82	0|0	0|1	1|1	1|1	0|1	1|1	0|1	0|1	0|1	.|.	1|1	0|1	1|1	0|1	0|1	1|1	0|1	.|.	0|1	14,0	1,10	0,3	0,3	1,2	0,8	8,3	1,3	1,3	.,.	0,4	1,1	0,3	8,8	3,2	0,2	7,4	.,.	5,7
Unigene0004072	411	411	A	T	SNP	.	1046.33	.|.	.|.	1|1	1|1	.|.	1|1	.|.	0|0	1|1	.|.	0|1	1|1	0|1	1|1	.|.	.|.	0|1	1|1	1|1	.,.	.,.	0,2	0,5	.,.	0,1	.,.	1,0	0,3	.,.	1,1	0,3	2,2	0,2	.,.	.,.	1,1	0,3	0,5
Unigene0004080	323	323	A	C	SNP	.	1978.48	1|1	1|1	0|0	0|1	0|0	1|1	0|0	1|1	0|1	1|1	0|1	0|0	0|1	0|0	0|0	0|0	0|1	1|1	0|1	0,15	0,4	7,0	32,11	14,1	0,2	25,0	0,2	2,2	0,2	8,4	18,2	14,2	23,0	16,0	13,1	2,4	0,1	3,8
Unigene0004080	453	453	A	G	SNP	.	9958.88	1|1	0|1	1|1	0|1	1|1	0|1	1|1	1|1	1|1	1|1	0|1	1|1	1|1	0|1	0|1	0|1	0|1	1|1	0|1	0,7	4,29	0,12	6,15	1,13	2,13	0,4	0,5	1,13	0,6	2,4	0,17	0,15	2,21	2,15	1,4	2,16	0,4	4,31
Unigene0004096	196	196	A	T	SNP	.	10488.5	1|1	1|1	1|1	0|1	1|1	1|1	0|1	1|1	0|1	1|1	0|1	1|1	0|1	0|1	1|1	0|1	1|1	1|1	1|1	0,7	0,44	0,12	3,6	0,11	0,14	12,26	0,11	4,14	0,28	4,11	0,12	2,7	2,14	0,30	4,8	0,15	0,4	0,25
Unigene0004096	411	411	C	G	SNP	.	867.38	0|0	0|1	1|1	1|1	1|1	0|0	0|1	0|0	0|0	0|0	0|0	1|1	0|0	0|0	1|1	1|1	0|0	0|0	0|0	3,0	11,4	1,3	0,3	0,2	2,0	3,4	3,0	4,0	5,0	1,0	0,3	1,0	1,0	0,5	0,2	7,0	4,0	11,0
Unigene0004099	64	64	A	G	SNP	.	1649.94	0|1	0|0	1|1	0|1	.|.	0|1	.|.	0|0	0|1	1|1	1|1	0|1	.|.	1|1	0|1	1|1	0|1	0|0	1|1	1,2	4,0	0,1	7,1	.,.	3,1	.,.	5,0	5,1	0,8	0,9	2,3	.,.	0,5	1,2	0,1	3,8	2,0	0,4
Unigene0004099	125	125	C	T	SNP	.	2635.2	1|1	0|1	0|1	0|1	1|1	0|1	.|.	1|1	0|1	0|1	0|0	0|1	.|.	0|0	1|1	1|1	0|1	1|1	0|1	0,10	1,9	2,2	1,8	0,1	1,5	.,.	0,8	3,9	10,1	11,0	2,3	.,.	5,0	0,3	0,1	5,10	0,4	4,3
Unigene0004102	733	733	G	A	SNP	.	1769.38	1|1	0|1	0|1	1|1	1|1	0|1	0|1	0|1	0|0	1|1	0|1	1|1	0|0	0|1	0|0	1|1	0|1	.|.	0|0	0,7	8,3	4,2	0,11	0,1	4,1	4,1	4,3	9,0	0,3	2,9	0,4	1,0	4,5	6,0	0,2	6,3	.,.	5,0
Unigene0004103	1678	1678	A	G	SNP	.	5537.42	1|1	0|1	1|1	0|1	0|1	0|1	1|1	1|1	0|1	0|1	1|1	0|1	1|1	0|1	0|1	1|1	0|1	0|1	0|1	0,20	2,9	0,9	4,12	3,2	1,9	0,11	0,10	1,4	4,6	0,7	1,4	0,5	1,13	2,3	0,7	2,8	1,6	6,10
Unigene0004109	155	155	A	G	SNP	.	2737.01	.|.	0|1	0|1	0|1	1|1	1|1	0|1	1|1	1|1	1|1	1|1	0|1	0|0	1|1	0|1	0|0	0|1	0|1	0|1	.,.	6,14	2,4	3,1	0,6	0,3	2,6	0,3	0,6	0,8	0,2	1,2	5,0	0,8	3,4	2,0	1,3	3,3	14,4
Unigene0004113	312	312	A	G	SNP	.	2293.83	0|1	0|1	0|1	1|1	1|1	0|0	0|1	.|.	0|1	0|1	.|.	0|1	1|1	0|1	1|1	1|1	0|1	1|1	1|1	2,2	2,4	1,3	0,4	0,5	2,0	1,1	.,.	1,1	5,3	.,.	1,4	0,3	1,10	0,9	0,1	1,8	0,1	0,3
Unigene0004115	519	519	C	G	SNP	.	958.41	.|.	.|.	1|1	0|1	0|0	1|1	1|1	0|1	0|1	0|0	1|1	1|1	0|1	0|0	.|.	1|1	0|1	0|0	0|0	.,.	.,.	0,5	2,1	1,0	0,2	0,6	1,0	1,2	2,0	0,3	0,1	5,1	3,0	.,.	0,2	4,4	1,0	2,0
Unigene0004119	975	975	G	A	SNP	.	4768.29	0|1	1|1	0|1	0|0	.|.	0|0	1|1	0|1	1|1	1|1	0|0	.|.	0|1	.|.	1|1	1|1	1|1	0|1	1|1	4,35	0,12	8,7	12,0	.,.	8,0	0,3	14,19	0,15	0,7	4,0	.,.	11,4	.,.	0,2	0,1	0,1	5,7	0,1
Unigene0004119	981	981	T	C	SNP	.	4694.22	0|1	1|1	0|1	0|0	.|.	0|0	1|1	0|1	1|1	1|1	0|0	.|.	0|1	.|.	1|1	1|1	1|1	0|1	1|1	4,36	0,11	9,7	13,0	.,.	9,0	0,3	14,19	0,15	0,7	4,0	.,.	10,4	.,.	0,2	0,1	0,1	5,7	0,1
Unigene0004134	783	783	A	G	SNP	.	10105.4	1|1	0|1	0|1	0|1	0|1	0|1	0|1	1|1	1|1	1|1	0|1	0|1	1|1	0|1	1|1	1|1	1|1	1|1	1|1	0,24	6,22	5,12	6,19	5,18	4,5	2,14	0,7	0,18	0,13	5,18	4,5	0,12	5,24	0,23	0,20	0,14	0,5	0,18
Unigene0004139	473	473	T	C	SNP	.	1773.09	0|1	1|1	0|0	0|1	0|1	0|0	0|1	1|1	1|1	1|1	0|1	0|0	1|1	1|1	1|1	1|1	0|1	1|1	0|1	1,2	0,3	4,0	4,1	3,2	4,0	6,2	0,6	0,7	0,3	9,2	1,0	0,4	0,11	0,1	0,1	8,3	0,2	2,1
Unigene0004144	2728	2728	T	C	SNP	.	9535.78	0|0	0|1	1|1	1|1	0|1	1|1	1|1	1|1	0|1	1|1	1|1	1|1	0|1	0|1	0|1	1|1	0|1	0|1	0|1	5,0	16,15	0,13	0,22	5,6	0,10	0,15	0,3	1,8	0,18	0,18	0,12	6,8	10,32	8,14	0,10	10,14	1,4	6,12
Unigene0004144	2825	2825	A	G	SNP	.	6350.13	1|1	1|1	1|1	1|1	1|1	1|1	1|1	1|1	0|1	1|1	1|1	1|1	0|1	1|1	0|1	1|1	0|1	0|0	0|1	0,12	0,12	0,4	0,18	0,4	0,11	0,5	0,8	1,5	0,8	0,4	0,13	7,7	0,25	5,7	0,5	11,10	2,0	6,11
Unigene0004144	2857	2857	A	G	SNP	.	2418.12	1|1	0|0	1|1	0|1	1|1	0|1	0|0	1|1	0|1	0|1	0|1	0|1	0|1	0|0	0|1	0|0	0|1	1|1	1|1	0,9	3,0	0,2	5,6	0,2	5,4	3,0	0,6	3,2	3,2	3,2	4,3	3,6	18,0	1,3	2,0	4,10	0,2	0,9
Unigene0004147	2706	2706	C	T	SNP	.	8939.81	1|1	1|1	1|1	0|1	0|1	1|1	0|1	0|1	0|1	1|1	1|1	0|1	1|1	0|1	1|1	0|1	1|1	1|1	1|1	1,8	0,26	0,9	3,27	3,9	0,5	13,12	4,7	4,27	0,7	0,9	8,7	0,9	8,6	0,1	7,6	0,25	0,9	0,8
Unigene0004157	1659	1659	G	A	SNP	.	534.6	0|1	0|1	1|1	0|1	1|1	1|1	1|1	0|0	0|0	.|.	0|1	1|1	0|0	0|0	1|1	.|.	0|0	.|.	0|0	4,3	6,2	0,1	2,1	0,2	0,1	0,2	2,0	1,0	.,.	1,1	0,1	5,0	2,0	0,2	.,.	1,0	.,.	1,0
Unigene0004172	188	188	A	G	SNP	.	2064.56	0|0	0|1	1|1	1|1	1|1	1|1	.|.	.|.	1|1	1|1	1|1	1|1	1|1	0|1	0|1	1|1	0|0	.|.	0|1	3,0	2,7	0,6	0,12	0,5	0,3	.,.	.,.	0,2	0,2	0,2	0,6	0,2	5,1	2,6	0,3	1,0	.,.	2,1
Unigene0004172	205	205	A	G	SNP	.	1372.38	1|1	0|1	0|1	0|1	0|0	0|1	.|.	.|.	1|1	1|1	0|0	0|1	1|1	1|1	0|1	0|1	1|1	1|1	1|1	0,4	3,2	1,2	6,3	3,0	1,1	.,.	.,.	0,4	0,2	2,0	1,4	0,4	0,2	2,4	1,2	0,1	0,1	0,2
Unigene0004172	1020	1020	C	G	SNP	.	4986.14	0|1	1|1	0|1	0|1	.|.	1|1	1|1	0|1	1|1	1|1	1|1	1|1	0|0	1|1	0|1	0|1	0|1	1|1	1|1	4,6	0,8	2,4	3,15	.,.	0,7	0,8	2,26	0,4	0,7	0,1	0,3	8,0	0,17	3,3	3,2	5,16	0,3	0,12
Unigene0004175	103	103	A	G	SNP	.	4998.75	1|1	1|1	0|1	0|1	0|1	0|1	0|1	1|1	0|1	1|1	0|1	0|1	0|1	0|1	1|1	0|1	0|1	0|1	1|1	0,14	1,7	7,7	12,12	2,5	3,8	14,9	0,17	4,2	0,5	5,6	5,6	5,4	15,12	0,5	4,3	4,2	4,1	1,6
Unigene0004176	114	115	GA	-	Deletion	.	7794.88	0|0	1|1	0|1	1|1	1|1	0|0	1|1	0|0	0|1	.|.	.|.	1|1	0|1	1|1	0|0	0|1	0|1	0|1	0|1	9,0	0,19	3,12	0,26	0,17	2,0	0,13	14,1	7,17	.,.	.,.	0,15	10,11	0,40	2,0	2,10	9,10	6,6	37,23
Unigene0004176	1108	1108	C	G	SNP	.	34915.1	1|1	0|1	1|1	1|1	0|1	0|1	1|1	1|1	0|1	0|1	1|1	0|1	0|1	0|1	0|1	1|1	0|1	0|1	0|1	0,51	31,42	0,62	0,66	12,30	6,43	0,52	0,68	41,32	16,62	0,72	16,45	13,27	23,60	23,40	0,59	6,54	4,8	14,47
Unigene0004184	199	199	A	C	SNP	.	8515.11	0|1	1|1	0|1	1|1	0|1	0|1	1|1	0|1	0|1	0|1	0|1	1|1	1|1	0|1	1|1	1|1	1|1	0|1	1|1	10,4	0,20	4,18	0,31	2,6	1,10	0,14	4,11	1,11	6,3	1,12	0,5	2,21	3,19	0,17	0,3	0,20	4,2	0,1
Unigene0004184	565	565	A	T	SNP	.	3902.28	0|1	0|1	0|1	1|1	1|1	1|1	1|1	0|1	1|1	0|1	0|1	0|1	0|1	0|1	0|1	0|1	1|1	0|0	.|.	10,3	15,4	6,11	0,5	0,1	0,4	0,4	6,5	0,11	2,5	7,11	1,2	8,10	7,8	1,5	1,4	0,14	3,0	.,.
Unigene0004187	189	189	C	T	SNP	.	1064.92	1|1	0|1	.|.	0|1	1|1	1|1	0|1	1|1	0|1	0|1	0|1	1|1	0|1	0|1	.|.	1|1	0|1	.|.	1|1	0,2	1,3	.,.	2,2	0,1	0,3	4,1	0,3	2,3	1,1	4,1	0,2	1,1	5,3	.,.	0,1	1,4	.,.	0,1
Unigene0004190	334	334	A	T	SNP	.	2231.09	1|1	0|1	0|1	1|1	0|1	1|1	0|1	1|1	0|1	1|1	0|1	0|1	1|1	0|0	0|1	0|1	0|1	0|0	0|1	0,3	19,4	3,3	0,6	6,3	0,5	7,4	0,4	3,2	0,5	6,7	3,1	0,3	6,0	2,5	2,2	2,5	1,0	1,4
Unigene0004193	597	597	A	G	SNP	.	1014.97	0|0	1|1	0|0	1|1	0|1	0|0	0|1	0|0	1|1	1|1	0|1	0|0	1|1	1|1	.|.	1|1	0|1	1|1	0|1	12,0	0,4	5,0	0,1	4,1	4,0	1,2	2,0	0,4	0,3	4,2	3,0	0,1	0,4	.,.	0,3	1,2	0,1	2,1
Unigene0004196	186	186	A	C	SNP	.	1859.6	0|0	0|1	0|1	1|1	0|1	.|.	1|1	1|1	0|1	0|1	.|.	0|0	0|1	1|1	0|1	1|1	1|1	0|0	1|1	1,0	1,3	4,1	0,7	1,2	.,.	0,2	0,1	1,4	1,4	.,.	1,0	1,1	0,11	3,6	0,1	0,6	1,0	0,4
Unigene0004199	202	202	G	A	SNP	.	1124.34	1|1	0|1	1|1	0|1	.|.	.|.	.|.	1|1	0|1	.|.	1|1	1|1	0|1	.|.	.|.	.|.	0|0	1|1	.|.	0,6	2,7	0,3	2,5	.,.	.,.	.,.	0,2	2,1	.,.	0,3	0,2	1,1	.,.	.,.	.,.	1,0	0,3	.,.
Unigene0004199	320	320	T	A	SNP	.	1591.39	1|1	0|1	0|0	0|1	1|1	0|1	0|0	1|1	0|1	0|1	1|1	1|1	0|1	0|1	1|1	0|1	0|0	1|1	0|0	0,1	5,11	7,0	11,2	0,7	8,1	3,0	0,4	2,2	7,3	0,1	0,5	2,4	2,1	0,2	1,1	5,0	0,2	4,0
Unigene0004200	802	802	G	T	SNP	.	5484.94	0|0	1|1	1|1	0|1	0|0	1|1	0|1	0|1	0|1	0|1	0|1	0|1	1|1	0|1	1|1	0|1	1|1	1|1	1|1	31,0	0,13	0,4	3,26	3,0	0,2	9,13	11,3	3,15	1,6	1,9	5,3	0,14	8,18	0,14	9,8	0,10	0,1	0,3
Unigene0004212	1070	1070	T	C	SNP	.	4253.45	1|1	0|1	0|1	0|1	0|1	0|1	1|1	1|1	1|1	0|1	0|1	0|1	1|1	0|1	0|1	0|0	1|1	1|1	1|1	0,14	10,13	8,1	6,8	6,4	5,1	0,5	0,14	0,19	1,5	1,3	1,2	0,8	3,2	6,2	2,0	0,1	0,7	0,7
Unigene0004212	1169	1169	T	C	SNP	.	1549.61	1|1	0|1	0|1	0|0	0|1	0|0	1|1	1|1	1|1	1|1	0|0	0|0	1|1	0|1	0|1	0|0	1|1	.|.	1|1	0,8	10,5	2,3	2,0	5,2	1,0	0,2	0,4	0,11	0,3	3,0	1,0	0,1	3,1	8,1	3,0	0,2	.,.	0,1
Unigene0004212	2155	2155	A	G	SNP	.	1501.34	1|1	0|1	0|1	1|1	0|1	1|1	0|1	1|1	0|0	1|1	0|1	0|1	1|1	0|1	.|.	1|1	0|1	1|1	0|1	0,8	13,4	4,1	0,1	16,4	0,4	7,5	0,6	26,1	0,2	7,3	12,1	0,3	8,1	.,.	0,3	6,2	0,2	5,1
Unigene0004212	2470	2470	C	T	SNP	.	1409	0|0	0|1	0|1	0|1	.|.	0|1	0|1	0|0	1|1	1|1	1|1	1|1	1|1	0|1	0|1	0|1	0|1	1|1	0|1	7,0	2,4	4,1	4,4	.,.	2,4	3,1	3,0	0,2	0,2	0,5	0,2	0,2	6,3	5,4	1,1	1,2	0,1	1,4
Unigene0004212	3009	3009	T	-	Deletion	.	661.76	0|1	1|1	1|1	0|0	0|1	0|1	1|1	0|1	1|1	1|1	.|.	0|1	1|1	.|.	1|1	.|.	0|1	.|.	0|0	3,1	0,6	0,1	20,1	21,2	4,1	0,1	3,1	0,3	0,1	.,.	18,2	0,1	.,.	0,3	.,.	29,3	.,.	18,0
Unigene0004218	434	434	T	C	SNP	.	2815.24	0|1	1|1	0|1	0|1	1|1	0|1	0|1	0|1	0|1	1|1	0|1	0|1	1|1	0|1	0|1	1|1	1|1	1|1	1|1	5,12	0,8	4,2	14,5	0,2	2,3	3,8	5,3	3,3	0,1	1,1	2,7	0,5	12,1	1,2	0,5	0,6	0,1	0,3
Unigene0004225	430	430	C	G	SNP	.	1739.69	0|1	0|1	0|1	0|1	0|0	0|1	0|1	1|1	1|1	0|1	1|1	1|1	0|1	0|1	1|1	.|.	1|1	.|.	0|1	5,7	5,1	5,6	2,3	3,0	2,1	1,2	0,10	0,6	2,1	0,2	0,1	2,1	5,2	0,3	.,.	0,5	.,.	2,2
Unigene0004225	1498	1498	T	C	SNP	.	1495.77	1|1	0|1	1|1	0|1	0|1	0|0	1|1	1|1	0|1	.|.	0|1	.|.	1|1	0|1	.|.	1|1	0|1	1|1	1|1	0,4	5,4	0,2	7,3	8,6	6,0	0,1	0,6	3,1	.,.	1,3	.,.	0,3	9,7	.,.	0,1	4,4	0,1	0,1
Unigene0004225	1730	1730	T	C	SNP	.	1634.99	1|1	0|1	0|1	0|1	0|1	0|1	1|1	1|1	1|1	0|0	0|1	.|.	1|1	0|1	.|.	1|1	1|1	0|0	.|.	0,6	5,4	1,1	1,6	5,4	3,1	0,1	0,8	0,4	1,0	1,2	.,.	0,1	2,8	.,.	0,1	0,2	1,0	.,.
Unigene0004225	2280	2280	A	G	SNP	.	1753.05	1|1	0|1	1|1	0|1	0|1	0|0	0|1	1|1	1|1	.|.	0|0	0|1	0|1	1|1	.|.	0|0	1|1	0|0	0|1	0,4	4,6	0,2	1,3	2,4	2,0	1,1	0,10	0,5	.,.	3,0	1,3	2,5	0,5	.,.	2,0	0,2	1,0	1,1
Unigene0004243	275	275	A	T	SNP	.	3297.29	1|1	0|1	1|1	0|1	0|1	0|1	0|1	1|1	1|1	1|1	0|1	0|1	0|1	1|1	0|1	0|1	0|1	0|1	1|1	0,4	10,6	0,1	3,14	1,2	2,4	4,7	0,3	0,7	0,3	2,10	3,1	2,1	0,10	2,11	1,2	2,2	2,1	0,2
Unigene0004249	33	33	G	T	SNP	.	496.61	0|0	.|.	.|.	1|1	1|1	.|.	1|1	.|.	.|.	.|.	1|1	1|1	.|.	0|1	1|1	1|1	1|1	.|.	.|.	2,0	.,.	.,.	0,1	0,2	.,.	0,3	.,.	.,.	.,.	0,1	0,3	.,.	1,1	0,1	0,2	0,1	.,.	.,.
Unigene0004251	418	418	G	C	SNP	.	1635.55	0|0	1|1	.|.	1|1	0|1	1|1	.|.	0|1	0|1	.|.	.|.	1|1	0|1	1|1	1|1	.|.	0|1	1|1	0|1	9,0	0,3	.,.	0,1	3,6	0,1	.,.	29,5	4,10	.,.	.,.	0,1	5,4	0,3	0,1	.,.	2,1	0,1	8,14
Unigene0004252	45	45	A	C	SNP	.	776.71	0|0	0|0	1|1	0|1	1|1	0|0	1|1	1|1	0|1	.|.	1|1	1|1	0|1	1|1	.|.	1|1	0|1	1|1	.|.	1,0	2,0	0,1	1,2	0,3	2,0	0,2	0,1	4,1	.,.	0,1	0,1	1,1	0,6	.,.	0,1	1,1	0,1	.,.
Unigene0004263	178	178	G	T	SNP	.	4018.01	1|1	1|1	0|1	1|1	1|1	1|1	1|1	1|1	0|1	0|1	0|1	0|1	1|1	1|1	0|1	0|1	0|1	1|1	0|1	0,6	0,8	4,10	0,7	0,1	1,3	0,3	0,4	7,8	3,4	3,3	2,3	0,3	0,21	19,10	2,2	8,15	0,1	9,4
Unigene0004264	160	160	C	T	SNP	.	32008.9	0|0	1|1	0|1	1|1	0|1	0|1	1|1	0|1	1|1	0|1	0|1	1|1	1|1	1|1	0|1	0|1	0|1	0|1	0|1	2,0	7115	2,18	1,49	3,37	2,34	0,65	31,7	4,77	26,62	5,19	2,33	2,65	0,79	28,50	17,31	28,30	3,29	34,17
Unigene0004264	238	238	C	T	SNP	.	33382.2	1|1	1|1	1|1	1|1	1|1	1|1	0|1	0|1	1|1	0|1	1|1	1|1	1|1	0|1	0|1	0|1	0|1	0|1	0|1	0,24	0,81	0,43	0,80	0,41	0,49	44,34	34,35	0,83	82,34	0,49	0,32	0,82	46,81	46,23	53,22	21,37	21,46	36,36
Unigene0004270	259	259	A	C	SNP	.	1202.25	.|.	0|1	0|1	0|0	1|1	1|1	0|1	1|1	0|0	1|1	1|1	1|1	0|0	0|1	0|1	0|1	0|1	.|.	0|1	.,.	6,2	1,1	11,0	0,2	0,5	2,4	0,1	7,0	0,2	0,2	0,3	3,0	6,4	4,3	3,1	3,2	.,.	3,3
Unigene0004270	508	508	C	T	SNP	.	5097.57	1|1	0|1	0|1	0|1	0|1	0|1	0|1	1|1	1|1	1|1	0|1	0|1	1|1	0|1	1|1	1|1	1|1	1|1	1|1	0,8	3,17	1,2	2,21	1,6	2,9	5,7	0,5	0,10	0,2	2,4	2,1	0,3	1,10	0,11	0,1	0,9	0,1	0,11
Unigene0004274	2551	2551	C	T	SNP	.	1307.49	1|1	0|1	0|0	0|1	0|0	0|0	1|1	1|1	0|1	0|0	0|1	0|0	.|.	1|1	1|1	1|1	0|1	1|1	0|1	0,6	9,3	4,0	3,1	2,0	3,0	0,2	0,5	7,2	4,0	4,3	3,0	.,.	0,7	0,3	0,4	6,1	0,2	7,1
Unigene0004274	2563	2563	A	G	SNP	.	1257.67	1|1	0|1	0|0	0|1	0|0	0|0	1|1	1|1	0|1	0|0	0|1	0|0	0|0	0|1	1|1	1|1	0|0	1|1	0|0	0,5	8,4	5,0	4,2	1,0	4,0	0,2	0,5	8,2	4,0	4,2	3,0	2,0	4,5	0,3	0,4	10,0	0,2	8,0
Unigene0004282	2016	2017	AA	-	Deletion	.	5278.22	1|1	0|1	1|1	0|1	1|1	0|1	1|1	1|1	0|1	0|1	0|1	0|1	1|1	0|1	1|1	1|1	0|1	0|1	0|1	0,13	8,20	0,3	2,13	0,3	7,6	1,16	0,21	12,7	1,5	2,4	2,3	0,5	1,4	0,1	0,6	3,4	4,2	2,6
Unigene0004300	692	692	A	G	SNP	.	6291.12	0|1	0|1	0|1	1|1	1|1	1|1	1|1	1|1	0|1	0|1	1|1	1|1	0|1	0|1	0|1	1|1	0|1	0|1	0|1	2,16	3,16	7,5	0,21	0,9	1,3	0,16	0,6	11,5	3,4	0,16	0,11	2,11	5,15	2,12	0,5	1,11	4,1	2,2
Unigene0004301	191	191	C	T	SNP	.	10540.7	0|1	1|1	0|1	0|1	1|1	0|1	0|1	0|1	0|1	1|1	1|1	0|1	0|1	0|1	0|1	0|1	0|1	1|1	1|1	12,14	2,32	1,10	9,14	0,12	3,19	8,6	4,12	6,20	0,20	0,25	6,11	8,5	4,32	7,14	5,4	4,17	0,7	0,19
Unigene0004305	482	482	C	G	SNP	.	3432.53	0|0	1|1	1|1	0|0	0|1	1|1	0|0	0|0	1|1	1|1	0|1	1|1	0|0	0|1	1|1	0|1	0|1	1|1	0|1	4,0	1,16	0,2	6,0	1,3	0,3	2,0	4,0	0,15	0,1	1,3	0,10	1,0	10,13	0,2	1,2	5,20	0,4	1,5
Unigene0004305	1069	1069	G	A	SNP	.	2448.72	1|1	0|1	1|1	1|1	1|1	0|0	1|1	1|1	1|1	.|.	.|.	1|1	0|1	1|1	0|1	0|1	0|1	1|1	0|1	0,6	4,3	0,5	0,2	0,1	5,0	0,3	0,7	0,8	.,.	.,.	0,2	4,2	0,5	5,1	2,1	17,12	0,2	10,9
Unigene0004307	111	111	A	G	SNP	.	3865.08	0|1	0|1	0|1	0|1	1|1	1|1	0|1	0|1	.|.	1|1	1|1	0|1	1|1	0|1	1|1	0|1	0|1	1|1	0|1	10,9	5,5	1,2	13,17	0,1	0,3	4,5	4,4	.,.	0,6	0,12	7,3	0,7	8,8	0,12	4,2	3,3	0,5	5,6
Unigene0004309	346	346	C	T	SNP	.	3512.4	.|.	0|1	0|1	0|1	0|1	1|1	0|0	1|1	0|1	0|1	1|1	0|1	0|1	0|1	0|1	1|1	1|1	0|1	1|1	.,.	4,3	6,5	11,5	4,8	0,11	6,0	0,5	1,12	2,5	1,6	1,7	4,4	1,8	2,8	0,1	0,8	1,5	0,5
Unigene0004325	163	163	A	G	SNP	.	978.01	.|.	.|.	1|1	0|1	.|.	0|0	1|1	.|.	.|.	1|1	1|1	1|1	1|1	0|0	0|0	0|0	1|1	1|1	1|1	.,.	.,.	0,3	1,1	.,.	1,0	0,2	.,.	.,.	0,5	0,2	0,1	0,5	1,0	1,0	1,0	0,3	0,1	0,3
Unigene0004325	166	166	A	T	SNP	.	372.08	.|.	.|.	0|1	1|1	.|.	1|1	1|1	.|.	.|.	0|0	0|0	0|0	0|0	1|1	1|1	1|1	0|0	0|0	0|0	.,.	.,.	1,2	0,2	.,.	0,1	0,2	.,.	.,.	5,0	2,0	1,0	5,0	0,1	0,1	0,2	3,0	1,0	3,0
Unigene0004325	195	195	A	T	SNP	.	1047.59	1|1	1|1	1|1	1|1	.|.	.|.	1|1	1|1	.|.	0|1	0|0	1|1	0|1	1|1	1|1	1|1	0|1	0|0	0|1	0,4	0,2	0,2	0,1	.,.	.,.	0,1	0,1	.,.	5,4	2,0	0,1	4,2	0,5	0,2	0,1	5,1	1,0	3,2
Unigene0004325	279	279	A	-	Deletion	.	2504.88	1|1	1|1	0|1	0|1	0|0	0|1	1|1	1|1	1|1	1|1	1|1	0|1	1|1	0|1	0|1	0|0	1|1	.|.	1|1	0,6	0,13	2,5	10,5	1,0	2,4	0,4	0,1	0,2	0,5	0,6	5,1	0,10	8,6	4,10	1,0	0,6	.,.	0,3
Unigene0004325	309	309	A	T	SNP	.	3727.67	1|1	1|1	0|1	0|1	1|1	0|1	1|1	.|.	1|1	1|1	1|1	0|1	1|1	0|1	0|1	0|0	1|1	.|.	1|1	0,2	0,20	1,8	10,7	0,1	3,8	0,3	.,.	0,2	0,6	0,8	4,3	0,11	7,6	5,11	1,0	0,7	.,.	0,3
Unigene0004329	334	334	C	T	SNP	.	3965.91	0|1	1|1	1|1	0|1	0|1	1|1	0|1	1|1	0|1	1|1	0|1	0|1	0|1	0|1	0|0	1|1	0|1	0|0	0|1	2,1	1,14	0,7	6,18	5,1	0,1	2,7	0,3	15,3	0,3	2,3	2,4	3,4	5,21	1,0	0,2	6,3	1,0	5,8
Unigene0004329	1860	1860	A	G	SNP	.	4429.43	0|1	0|1	1|1	1|1	1|1	1|1	0|1	0|0	1|1	1|1	1|1	1|1	1|1	0|1	1|1	1|1	1|1	1|1	1|1	6,6	2,16	0,6	0,15	0,4	0,2	1,9	2,0	0,1	0,2	0,3	0,1	0,5	2,10	0,13	0,3	0,3	0,1	0,3
Unigene0004329	1865	1865	A	G	SNP	.	4294.86	0|1	0|1	1|1	1|1	1|1	1|1	0|1	0|0	1|1	1|1	1|1	.|.	1|1	0|1	1|1	1|1	1|1	1|1	1|1	6,6	2,16	0,7	0,14	0,4	0,2	1,9	2,0	0,1	0,3	0,2	.,.	0,5	2,10	0,12	0,3	0,3	0,1	0,3
Unigene0004330	198	198	A	G	SNP	.	740.58	0|1	0|1	.|.	0|1	0|1	0|1	1|1	0|1	1|1	1|1	1|1	0|0	.|.	0|1	.|.	1|1	.|.	1|1	0|1	2,2	3,2	.,.	3,2	1,1	1,1	0,4	1,2	0,2	0,1	0,1	1,0	.,.	4,2	.,.	0,1	.,.	0,1	2,1
Unigene0004345	128	128	C	T	SNP	.	1203.45	.|.	1|1	0|0	1|1	1|1	0|1	0|1	0|1	1|1	0|1	0|0	1|1	0|0	0|1	0|1	0|1	1|1	1|1	0|1	.,.	0,7	15,0	0,3	0,1	4,3	2,1	7,2	0,1	16,2	13,0	0,4	8,0	1,3	5,2	1,2	0,2	0,1	1,1
Unigene0004345	188	188	G	A	SNP	.	2574.98	.|.	1|1	0|1	1|1	1|1	0|1	0|1	0|1	1|1	0|1	0|0	1|1	0|1	0|1	0|1	0|1	1|1	1|1	0|1	.,.	0,15	21,3	0,8	0,2	8,7	9,2	10,3	0,2	28,6	25,1	0,10	11,2	12,5	16,3	7,4	0,2	0,4	1,2
Unigene0004345	253	253	A	T	SNP	.	4921.95	0|1	1|1	0|1	1|1	1|1	0|1	0|1	0|1	0|1	0|1	0|0	1|1	0|0	0|1	0|1	0|1	1|1	1|1	1|1	2,5	0,30	23,7	0,17	0,6	9,7	21,8	16,11	1,6	40,9	37,1	0,15	9,0	20,7	20,3	19,3	0,4	0,7	0,2
Unigene0004345	357	357	T	C	SNP	.	1332.83	1|1	1|1	0|0	1|1	1|1	0|1	0|0	0|1	0|1	0|0	0|0	1|1	0|1	0|0	0|0	0|0	.|.	1|1	.|.	0,1	0,18	24,0	0,8	0,1	8,1	27,0	17,4	3,1	55,1	41,0	0,3	20,2	18,0	25,1	19,0	.,.	0,3	.,.
Unigene0004345	433	433	A	G	SNP	.	8109.21	1|1	1|1	0|1	1|1	1|1	0|1	0|1	0|1	0|1	0|1	0|1	1|1	0|1	0|1	0|1	0|1	1|1	1|1	1|1	0,17	0,43	26,7	0,9	0,12	6,17	25,6	16,11	3,4	43,22	27,21	0,12	16,7	22,11	19,5	21,4	0,9	0,10	0,1
Unigene0004345	663	663	C	G	SNP	.	3175.24	1|1	0|0	0|1	1|1	1|1	0|1	0|1	0|1	0|1	0|1	0|1	1|1	0|0	0|1	0|0	0|1	1|1	1|1	.|.	0,8	3,0	13,12	0,3	0,9	2,1	4,9	9,7	1,5	12,9	7,3	0,2	7,0	5,6	1,0	5,7	0,3	0,7	.,.
Unigene0004345	725	725	C	T	SNP	.	1559.86	0|0	.|.	0|1	0|0	0|0	1|1	0|1	0|1	1|1	0|1	0|1	0|0	1|1	1|1	1|1	0|1	1|1	0|0	.|.	2,0	.,.	6,4	2,0	5,0	0,2	2,6	4,8	0,6	5,6	1,4	1,0	0,3	0,1	0,1	4,3	0,1	2,0	.,.
Unigene0004345	1060	1060	C	A	SNP	.	1519.82	0|0	.|.	0|1	0|0	0|0	1|1	0|1	0|1	0|0	1|1	1|1	0|0	1|1	0|1	1|1	0|0	0|0	1|1	0|0	3,0	.,.	4,10	5,0	6,0	0,3	4,5	12,10	2,0	0,4	0,5	1,0	0,2	10,2	0,1	3,0	5,0	0,2	2,0
Unigene0004345	1649	1649	C	T	SNP	.	6613.5	0|1	0|1	0|0	0|1	0|1	1|1	0|1	1|1	1|1	0|1	.|.	0|1	1|1	0|1	1|1	0|1	0|1	1|1	1|1	13,6	7,25	1,0	4,17	2,2	0,1	7,3	0,15	0,4	2,8	.,.	1,3	0,28	4,20	0,11	3,4	1,8	0,14	0,6
Unigene0004348	378	378	A	G	SNP	.	14644.8	1|1	1|1	1|1	0|1	1|1	1|1	0|1	1|1	0|1	1|1	0|1	1|1	1|1	0|1	0|1	0|1	0|1	0|1	0|1	0,32	0,30	0,22	16,54	0,5	0,19	10,17	0,10	3,23	0,14	7,13	0,13	0,19	10,39	15,14	8,14	7,17	3,9	8,31
Unigene0004361	517	517	A	G	SNP	.	5734.95	.|.	0|1	1|1	0|1	1|1	0|0	0|1	1|1	0|1	0|1	1|1	1|1	0|1	1|1	0|1	1|1	.|.	0|1	0|1	.,.	4,10	0,1	1,3	0,4	1,0	12,29	0,1	1,12	21,27	2,15	0,2	2,3	0,3	4,7	0,21	.,.	14,19	1,1
Unigene0004363	1028	1028	C	T	SNP	.	2724.82	0|1	1|1	1|1	0|1	0|1	1|1	0|0	1|1	1|1	0|1	1|1	1|1	1|1	0|1	1|1	1|1	1|1	1|1	.|.	4,6	0,7	0,1	4,8	1,3	0,5	4,0	0,3	0,8	1,6	0,3	0,3	0,7	5,2	0,3	0,5	0,5	0,3	.,.
Unigene0004365	1239	1239	C	T	SNP	.	544.14	1|1	0|0	0|0	0|1	1|1	.|.	0|1	.|.	0|0	.|.	.|.	1|1	.|.	0|1	1|1	1|1	0|0	1|1	.|.	0,1	1,0	1,0	1,4	0,1	.,.	1,2	.,.	12,0	.,.	.,.	0,1	.,.	1,1	0,1	0,1	6,0	0,3	.,.
Unigene0004365	2155	2155	A	G	SNP	.	3403.65	0|1	0|1	.|.	1|1	.|.	0|0	0|1	1|1	1|1	0|0	1|1	1|1	.|.	0|1	.|.	0|1	1|1	.|.	1|1	2,13	5,0	.,.	0,10	.,.	2,0	1,12	0,11	0,1	5,0	0,1	0,3	.,.	3,17	.,.	1,7	0,9	.,.	0,5
Unigene0004381	1387	1387	G	T	SNP	.	3394.36	1|1	0|1	1|1	0|1	0|1	1|1	1|1	1|1	1|1	1|1	1|1	0|1	0|1	0|1	0|1	0|1	0|1	0|0	0|1	0,9	4,4	0,7	3,4	2,8	0,2	0,7	0,3	0,4	0,5	0,5	1,11	3,8	1,5	2,1	1,1	2,7	1,0	1,5
Unigene0004385	4854	4854	A	G	SNP	.	4172.28	1|1	0|1	0|1	0|1	0|1	0|1	0|1	1|1	0|1	0|1	1|1	0|1	1|1	0|1	1|1	1|1	1|1	0|1	1|1	0,8	4,18	4,3	4,7	1,3	1,4	1,4	0,12	4,3	1,6	0,6	2,3	0,6	2,16	0,1	0,3	0,4	1,4	0,5
Unigene0004393	1256	1256	A	G	SNP	.	1089.39	0|1	0|0	1|1	0|1	1|1	0|1	1|1	1|1	0|1	0|1	1|1	0|1	0|0	0|1	0|0	.|.	1|1	1|1	.|.	1,1	2,0	0,4	1,2	0,1	1,3	0,1	0,4	11,2	2,2	0,4	1,2	3,0	2,3	2,0	.,.	0,1	0,2	.,.
Unigene0004399	338	338	T	C	SNP	.	1750.84	1|1	.|.	0|1	0|0	.|.	.|.	0|0	1|1	1|1	.|.	1|1	0|0	1|1	.|.	.|.	0|1	0|1	.|.	1|1	0,1	.,.	45,37	1,0	.,.	.,.	2,0	0,4	0,1	.,.	0,1	21,0	0,1	.,.	.,.	1,1	1,2	.,.	0,1
Unigene0004400	575	575	G	A	SNP	.	1869.43	0|1	1|1	.|.	1|1	.|.	.|.	1|1	1|1	0|0	.|.	.|.	.|.	.|.	.|.	.|.	.|.	1|1	.|.	1|1	7,1	0,17	.,.	0,8	.,.	.,.	0,8	0,1	1,0	.,.	.,.	.,.	.,.	.,.	.,.	.,.	0,5	.,.	0,9
Unigene0004400	1285	1285	G	A	SNP	.	642.42	.|.	0|1	.|.	0|0	.|.	1|1	0|0	1|1	1|1	1|1	1|1	.|.	0|1	1|1	.|.	.|.	0|1	1|1	0|1	.,.	15,2	.,.	4,0	.,.	0,2	12,0	0,1	0,2	0,1	0,1	.,.	1,1	0,3	.,.	.,.	4,3	0,3	12,1
Unigene0004400	1297	1297	A	G	SNP	.	453.43	.|.	0|1	.|.	0|0	.|.	1|1	0|0	1|1	1|1	1|1	1|1	.|.	0|0	1|1	.|.	.|.	0|1	1|1	0|0	.,.	16,2	.,.	3,0	.,.	0,2	8,0	0,1	0,2	0,1	0,1	.,.	1,0	0,2	.,.	.,.	6,1	0,2	13,1
Unigene0004400	1738	1738	T	C	SNP	.	846.1	.|.	0|0	1|1	0|0	.|.	.|.	0|0	1|1	1|1	.|.	.|.	.|.	.|.	1|1	1|1	1|1	0|1	1|1	0|1	.,.	12,0	0,5	8,0	.,.	.,.	2,0	0,1	0,1	.,.	.,.	.,.	.,.	0,4	0,6	0,2	9,3	0,3	10,1
Unigene0004411	463	463	A	G	SNP	.	2202.42	1|1	1|1	1|1	1|1	1|1	1|1	0|1	1|1	0|1	0|1	.|.	1|1	0|0	1|1	1|1	1|1	0|1	0|0	0|1	0,7	0,1	0,3	1,9	0,2	0,1	2,4	0,3	1,6	2,4	.,.	0,1	2,0	0,5	0,4	0,1	4,7	1,0	1,6
Unigene0004413	172	172	G	C	SNP	.	13664	.|.	0|1	0|0	1|1	0|0	1|1	0|0	.|.	0|0	1|1	1|1	0|0	0|0	0|0	0|1	0|1	1|1	1|1	1|1	.,.	117164	15,1	0,7	31,1	0,42	94,4	.,.	26,1	0,10	0,3	26,0	63,1	67,4	119,13	30,4	0,39	0,41	0,71
Unigene0004417	326	326	C	T	SNP	.	1652.39	1|1	0|1	1|1	0|1	1|1	1|1	0|1	1|1	0|1	1|1	1|1	1|1	0|1	0|1	0|0	0|0	0|1	.|.	0|1	0,5	3,3	0,1	4,4	0,1	0,1	4,1	0,8	6,4	0,4	0,3	0,2	1,1	8,2	4,0	2,0	1,5	.,.	1,1
Unigene0004423	523	523	A	C	SNP	.	2858.17	0|1	0|1	0|1	1|1	1|1	0|0	1|1	0|1	1|1	1|1	0|1	1|1	0|1	1|1	1|1	1|1	0|1	0|1	0|1	7,5	4,4	2,2	0,8	0,1	1,0	0,2	5,3	0,8	0,14	2,5	0,3	3,3	0,3	0,2	0,2	2,5	1,6	1,3
Unigene0004423	1083	1083	T	C	SNP	.	1570.41	0|1	0|0	0|1	1|1	1|1	1|1	0|0	0|1	0|1	1|1	1|1	.|.	0|1	1|1	1|1	.|.	0|1	0|1	0|1	13,7	1,0	3,1	0,7	0,1	0,1	7,1	13,3	2,6	0,8	0,1	.,.	10,1	0,3	0,1	.,.	3,4	6,1	1,1
Unigene0004423	1109	1109	A	T	SNP	.	2057.55	0|1	0|1	0|0	1|1	1|1	1|1	0|1	0|1	0|1	1|1	1|1	.|.	0|0	1|1	1|1	.|.	0|1	0|0	0|1	14,9	1,1	2,0	0,9	0,1	0,1	8,4	13,4	2,4	0,8	0,2	.,.	9,0	0,2	0,2	.,.	4,1	5,0	1,4
Unigene0004423	1266	1266	C	G	SNP	.	8350.88	0|1	0|1	0|1	1|1	1|1	1|1	0|1	0|1	0|1	1|1	1|1	1|1	0|1	1|1	1|1	1|1	0|1	0|1	0|1	6,11	2,11	4,10	0,18	0,13	0,9	5,16	6,11	2,7	0,11	0,18	0,11	4,10	0,21	0,6	0,4	3,27	4,5	1,9
Unigene0004424	1501	1501	T	C	SNP	.	13732.2	0|1	0|1	1|1	1|1	0|1	0|1	1|1	0|1	0|1	1|1	1|1	0|1	0|1	1|1	0|1	0|1	1|1	0|1	1|1	4,16	40,12	0,9	0,33	6,24	3,15	3,38	5,29	17,25	0,31	0,23	3,9	12,4	0,26	1,1	16,11	0,17	6,16	0,34
Unigene0004430	644	644	A	G	SNP	.	10164.2	1|1	0|1	1|1	0|1	1|1	1|1	0|1	1|1	0|1	1|1	0|1	0|1	0|0	1|1	1|1	0|1	1|1	0|1	1|1	0,12	4,23	0,6	4,21	1,20	0,17	16,11	0,27	2,13	2,16	5,12	2,8	4,0	0,28	0,1	3,6	0,13	2,4	0,16
Unigene0004431	219	219	A	C	SNP	.	12423.9	0|1	0|1	1|1	1|1	0|1	0|1	1|1	1|1	1|1	1|1	0|1	0|1	1|1	1|1	1|1	0|1	0|1	1|1	0|1	18,9	6,51	0,15	0,11	4,16	6,7	1,20	0,25	0,28	0,22	7,32	3,14	1,26	0,23	0,4	1,10	9,5	0,14	18,25
Unigene0004442	198	198	A	C	SNP	.	874.53	1|1	1|1	0|1	0|1	0|1	1|1	1|1	1|1	1|1	1|1	1|1	0|0	1|1	0|0	0|0	0|0	1|1	1|1	0|1	0,1	0,3	1,1	2,1	1,1	0,1	0,1	0,1	0,4	0,2	0,2	2,0	0,1	2,0	3,0	3,0	0,3	0,1	6,3
Unigene0004442	462	462	A	G	SNP	.	763.57	.|.	1|1	0|1	0|1	0|1	0|1	0|0	1|1	1|1	1|1	1|1	0|0	1|1	0|0	0|0	0|1	0|1	.|.	0|1	.,.	0,1	2,1	4,1	1,1	2,1	2,0	0,3	0,2	0,2	0,2	6,0	0,1	2,0	1,0	1,3	1,1	.,.	3,4
Unigene0004442	491	491	A	C	SNP	.	820.33	1|1	1|1	1|1	0|1	0|0	0|1	0|0	1|1	1|1	1|1	1|1	0|0	1|1	0|0	0|0	0|1	0|1	.|.	0|1	0,1	0,1	0,2	3,2	1,0	1,1	3,0	0,3	0,2	0,2	0,2	6,0	0,1	3,0	1,0	2,2	1,2	.,.	2,4
Unigene0004447	1085	1085	C	T	SNP	.	727.74	0|1	1|1	.|.	0|1	0|1	1|1	0|1	1|1	1|1	1|1	0|1	0|1	.|.	1|1	0|0	0|0	0|1	.|.	.|.	2,2	0,1	.,.	4,1	1,1	0,1	3,1	0,1	0,1	0,3	3,1	1,3	.,.	0,4	2,0	1,0	1,2	.,.	.,.
Unigene0004478	460	460	G	C	SNP	.	12475.1	1|1	1|1	1|1	1|1	1|1	0|0	1|1	1|1	0|1	0|1	1|1	1|1	.|.	0|1	1|1	1|1	.|.	0|1	1|1	0,10	0,76	0,8	0,13	0,13	2,0	0,42	2,33	15,17	48,56	0,7	0,8	.,.	5,3	0,3	0,27	.,.	16,3	0,2
Unigene0004478	1045	1045	A	G	SNP	.	7217.74	.|.	0|1	1|1	0|1	0|1	0|1	1|1	1|1	1|1	0|1	1|1	0|1	1|1	1|1	1|1	1|1	.|.	1|1	1|1	.,.	18,38	0,4	10,3	3,6	4,1	0,27	0,1	0,12	15,36	0,4	5,5	0,1	0,7	0,3	0,5	.,.	0,6	0,11
Unigene0004483	338	338	C	T	SNP	.	13955.5	1|1	0|1	1|1	1|1	0|1	0|1	1|1	1|1	1|1	1|1	1|1	1|1	0|1	0|1	1|1	1|1	1|1	0|1	1|1	0,14	10,20	0,10	0,13	5,26	6,5	0,13	0,24	2,23	0,9	0,14	1,22	4,23	4,26	0,14	0,8	0,27	3,13	0,27
Unigene0004484	454	454	A	G	SNP	.	1761.59	.|.	1|1	0|0	0|1	.|.	.|.	0|1	1|1	1|1	0|1	0|1	0|0	1|1	0|0	1|1	0|1	.|.	0|1	1|1	.,.	0,6	1,0	1,2	.,.	.,.	8,11	0,7	0,2	18,6	1,2	1,0	0,1	1,0	0,2	3,4	.,.	2,3	0,1
Unigene0004485	879	879	A	G	SNP	.	16023.7	1|1	0|1	1|1	0|1	1|1	1|1	0|1	1|1	0|1	1|1	1|1	0|1	0|1	0|1	1|1	0|1	1|1	1|1	1|1	0,21	32,42	0,13	15,17	0,20	0,24	12,31	0,33	4,33	0,29	0,44	2,10	11,13	6,45	0,1	10,17	0,17	0,10	0,22
Unigene0004485	3108	3108	A	G	SNP	.	1734.18	.|.	0|1	1|1	0|0	0|1	.|.	1|1	1|1	0|1	1|1	1|1	0|0	0|1	0|1	0|1	0|1	1|1	1|1	1|1	.,.	31,6	0,2	28,1	8,2	.,.	0,2	0,14	1,2	0,1	0,3	12,0	26,4	26,5	40,5	15,2	0,3	0,1	0,2
Unigene0004485	3109	3109	A	C	SNP	.	1734.18	.|.	0|1	1|1	0|0	0|1	.|.	1|1	1|1	0|1	1|1	1|1	0|0	0|1	0|1	0|1	0|1	1|1	1|1	1|1	.,.	31,6	0,2	28,0	8,2	.,.	0,1	0,12	1,1	.	0,1	11,0	26,3	26,5	39,3	14,2	0,3	0,1	0,1
Unigene0004487	99	99	A	G	SNP	.	2902.3	1|1	1|1	1|1	0|0	0|0	0|0	.|.	.|.	1|1	.|.	.|.	0|1	1|1	0|0	.|.	.|.	1|1	.|.	1|1	0,8	0,1	0,10	44,1	9,0	16,1	.,.	.,.	0,21	.,.	.,.	32,7	0,1	62,4	.,.	.,.	0,15	.,.	0,8
Unigene0004487	717	717	T	G	SNP	.	1694.23	1|1	1|1	1|1	0|0	0|0	0|0	.|.	.|.	1|1	.|.	.|.	0|0	.|.	0|0	.|.	.|.	1|1	.|.	1|1	0,8	0,1	0,10	24,0	10,0	14,0	.,.	.,.	0,11	.,.	.,.	24,0	.,.	55,2	.,.	.,.	0,6	.,.	0,8
Unigene0004489	60	60	C	T	SNP	.	2229.39	0|0	1|1	0|1	1|1	1|1	0|1	0|1	1|1	0|1	0|1	1|1	1|1	1|1	0|1	0|1	0|1	0|1	.|.	0|1	12,0	0,8	3,1	0,8	0,1	2,1	4,2	0,4	2,4	7,1	0,1	0,2	0,3	9,5	10,6	1,2	6,5	.,.	5,6
Unigene0004496	93	93	C	T	SNP	.	6441.73	1|1	0|1	1|1	1|1	1|1	0|1	0|1	1|1	0|1	1|1	0|1	1|1	0|1	0|1	0|1	0|1	1|1	0|1	1|1	0,18	10,10	0,1	0,11	0,6	7,3	2,13	0,13	2,21	0,1	1,4	0,2	9,8	17,4	18,14	2,6	0,7	2,6	0,15
Unigene0004496	200	200	C	G	SNP	.	16051.6	1|1	0|1	0|1	1|1	1|1	0|1	0|1	1|1	0|1	1|1	0|1	1|1	0|1	0|1	0|1	0|1	1|1	0|1	1|1	0,28	18,38	15,21	0,39	0,30	20,10	18,19	0,7	11,19	0,39	29,14	1,18	20,11	55,11	25,25	10,12	1,26	3,5	0,37
Unigene0004496	1177	1177	A	C	SNP	.	58044.6	1|1	0|1	1|1	1|1	1|1	1|1	1|1	1|1	1|1	0|1	0|1	1|1	0|1	0|1	0|1	0|1	0|1	0|1	0|1	0,97	23145	0,91	0,136	0,121	0,59	0,132	1104	5123	13,69	38,59	0,52	44,41	15106	33,41	19,54	27,72	15,48	34102
Unigene0004496	1276	1276	T	-	Deletion	.	4047.56	0|1	1|1	1|1	0|1	0|1	1|1	0|1	1|1	0|1	1|1	1|1	0|1	0|0	0|1	0|1	0|0	0|1	1|1	0|1	2,5	1,22	0,4	3,11	2,11	0,6	4,9	0,1	1,13	1,15	0,8	0,5	7,0	4,5	5,5	1,0	6,4	1,10	5,13
Unigene0004503	1571	1571	G	C	SNP	.	586.45	0|0	0|0	0|0	0|0	1|1	0|1	0|1	0|0	0|0	0|1	1|1	.|.	1|1	0|1	0|0	1|1	1|1	0|1	1|1	7,0	13,1	5,0	8,0	0,1	3,4	4,2	7,0	7,0	8,1	0,1	.,.	0,2	4,1	4,0	0,1	0,4	1,1	0,1
Unigene0004505	306	306	G	T	SNP	.	1204.91	1|1	.|.	1|1	0|1	1|1	0|1	0|1	0|0	0|1	0|0	1|1	1|1	0|1	0|1	.|.	1|1	1|1	0|0	1|1	0,1	.,.	0,3	5,6	0,3	3,2	3,2	16,0	1,3	1,0	0,3	0,2	6,1	2,3	.,.	0,3	0,3	4,0	0,1
Unigene0004505	314	314	G	-	Deletion	.	1181.32	1|1	.|.	0|1	0|1	1|1	0|1	0|1	0|0	0|1	0|0	1|1	1|1	0|1	0|1	.|.	1|1	1|1	0|0	1|1	0,1	.,.	1,2	5,6	0,3	3,4	3,3	17,0	1,4	1,0	0,3	0,2	6,1	2,5	.,.	0,3	0,3	4,0	0,1
Unigene0004520	1085	1085	A	C	SNP	.	3360.5	0|1	0|1	1|1	0|1	0|1	0|1	0|1	1|1	0|1	0|1	0|1	0|1	0|1	0|1	0|1	1|1	1|1	1|1	1|1	7,8	18,7	0,5	12,8	4,1	5,5	7,5	0,8	11,9	12,1	5,2	3,1	6,1	12,1	4,3	0,4	0,8	0,2	0,11
Unigene0004520	1223	1223	A	G	SNP	.	1891.21	0|1	0|1	0|0	1|1	1|1	1|1	1|1	0|1	0|1	0|1	0|1	1|1	1|1	0|1	0|1	0|0	0|0	0|0	.|.	4,7	2,5	3,0	0,4	0,4	0,1	0,2	2,1	2,3	3,2	1,1	0,3	0,2	1,5	1,4	2,0	5,0	2,0	.,.
Unigene0004521	951	951	G	C	SNP	.	1802.51	0|1	0|0	0|0	1|1	0|1	.|.	.|.	.|.	1|1	1|1	0|0	1|1	1|1	1|1	0|1	.|.	0|1	.|.	0|1	11,7	1,0	4,0	0,2	2,1	.,.	.,.	.,.	0,2	0,2	2,0	0,1	0,5	0,13	2,4	.,.	5,3	.,.	5,1
Unigene0004522	577	577	A	G	SNP	.	637.43	1|1	0|1	0|1	0|0	1|1	1|1	1|1	0|1	0|1	.|.	0|0	.|.	0|1	1|1	1|1	1|1	0|1	0|0	0|1	0,1	1,1	2,2	3,0	0,1	0,1	0,2	2,2	3,3	.,.	1,0	.,.	1,1	0,1	0,1	0,1	5,1	1,0	3,1
Unigene0004535	1253	1253	A	G	SNP	.	9045.24	1|1	1|1	0|1	0|1	0|1	1|1	0|1	1|1	0|1	1|1	1|1	0|1	0|1	0|1	1|1	1|1	1|1	1|1	1|1	0,10	0,16	2,16	2,16	1,6	0,10	2,13	0,13	1,8	0,10	1,16	1,5	3,12	2,20	2,34	0,7	0,20	0,5	0,17
Unigene0004535	1286	1286	A	T	SNP	.	7366.23	1|1	0|1	0|1	1|1	0|1	0|1	0|1	1|1	0|1	0|1	0|1	1|1	0|1	1|1	0|1	0|1	0|1	0|1	1|1	0,12	5,8	4,15	0,21	2,3	2,9	1,12	0,11	5,7	5,8	2,14	0,6	10,3	0,21	11,18	4,2	2,18	2,4	1,17
Unigene0004545	187	187	C	T	SNP	.	4878.34	0|1	0|1	0|1	0|1	1|1	1|1	1|1	1|1	1|1	1|1	0|1	0|1	1|1	1|1	1|1	0|1	1|1	0|1	1|1	2,10	4,5	1,1	4,8	0,3	0,7	0,12	0,9	0,1	0,8	1,7	2,3	0,4	0,13	0,15	1,1	0,3	1,3	0,3
Unigene0004545	199	199	C	T	SNP	.	4829.49	0|1	0|1	0|1	0|1	1|1	1|1	1|1	1|1	1|1	1|1	0|1	0|1	1|1	1|1	1|1	1|1	1|1	0|1	1|1	1,8	3,5	1,2	3,8	0,3	0,6	0,12	0,9	0,1	0,7	1,7	2,4	0,7	0,13	0,13	0,1	0,2	1,4	0,1
Unigene0004549	528	528	G	T	SNP	.	2021.97	.|.	0|1	0|1	0|1	0|1	1|1	0|1	.|.	1|1	0|1	1|1	0|1	0|1	1|1	.|.	1|1	0|0	.|.	1|1	.,.	2,6	1,1	1,2	1,4	0,1	1,2	.,.	0,5	1,1	0,6	1,3	1,9	2,13	.,.	0,3	2,0	.,.	0,1
Unigene0004549	586	586	G	-	Deletion	.	2659.11	.|.	0|1	1|1	0|1	0|1	0|1	0|1	1|1	0|0	0|1	0|1	0|1	0|1	0|1	1|1	0|1	1|1	1|1	1|1	.,.	10,5	0,4	11,10	4,3	2,4	9,4	0,1	10,1	2,8	3,12	1,2	6,4	11,18	0,1	1,10	0,2	0,5	0,4
Unigene0004549	1071	1071	A	G	SNP	.	23230.2	1|1	1|1	0|1	0|1	0|1	0|1	0|1	1|1	0|1	0|1	1|1	0|1	1|1	0|1	1|1	1|1	0|1	0|1	0|1	0,38	0,55	5,21	9,26	14,19	3,22	10,26	0,60	17,35	18,34	0,21	2,10	0,34	8,45	0,74	0,33	23,8	3,26	27,22
Unigene0004560	390	390	A	G	SNP	.	10325.1	1|1	0|1	1|1	1|1	0|1	0|1	1|1	1|1	0|1	1|1	1|1	0|1	1|1	0|1	1|1	1|1	0|1	1|1	0|1	0,5	9,16	0,29	0,21	22,13	3,20	0,13	0,29	16,24	0,27	0,17	14,9	0,5	18,11	0,1	0,3	12,6	0,8	54,27
Unigene0004560	489	489	G	T	SNP	.	6072.26	1|1	1|1	0|1	1|1	1|1	0|1	.|.	1|1	1|1	0|1	0|1	1|1	1|1	0|1	1|1	1|1	0|1	1|1	0|1	0,4	0,17	7,6	0,2	0,8	3,6	.,.	0,14	0,18	13,3	4,4	0,7	0,15	4,6	0,4	0,1	1,7	0,8	9,20
Unigene0004577	317	317	A	G	SNP	.	19234.7	1|1	0|1	0|1	0|1	0|1	0|1	1|1	1|1	0|1	1|1	1|1	0|1	1|1	0|1	0|1	1|1	1|1	0|1	1|1	0,9	137,38	89,30	108,44	65,9	95,30	0,27	0,7	101,78	0,23	0,30	41,9	0,50	51,42	7,12	0,18	0,28	50,26	0,30
Unigene0004577	326	326	A	G	SNP	.	38530.8	.|.	1|1	0|1	1|1	1|1	0|1	0|1	0|0	0|1	0|0	0|0	1|1	0|1	1|1	0|1	0|1	1|1	0|1	1|1	.,.	0,154	20,90	0,132	0,69	22,96	0,16	.	28131	26,0	31,0	0,43	14,27	0,80	9,12	11,6	0,17	10,57	0,14
Unigene0004577	772	772	-	T	Insertion	.	601.62	0|1	1|1	0|0	1|1	0|1	.|.	1|1	0|0	1|1	1|1	0|1	0|1	0|1	0|1	.|.	.|.	1|1	0|1	1|1	25,8	0,2	0,0	0,3	3,2	.,.	0,2	2,0	0,5	0,2	11,9	6,4	1,2	1,1	.,.	.,.	0,2	1,1	0,2
Unigene0004584	388	388	A	G	SNP	.	2901.33	1|1	0|1	0|1	0|1	1|1	.|.	0|1	1|1	0|1	0|1	0|1	1|1	0|1	1|1	0|1	0|1	0|1	1|1	0|1	0,1	3,2	2,1	1,8	0,9	.,.	2,7	0,8	7,6	1,1	2,2	0,2	2,2	0,5	1,4	1,10	2,7	0,2	3,2
Unigene0004586	80	80	A	G	SNP	.	710.77	0|0	0|1	0|1	0|1	0|0	0|1	1|1	.|.	.|.	.|.	0|0	0|1	0|1	1|1	1|1	1|1	1|1	1|1	.|.	4,0	2,3	1,1	4,2	1,0	1,1	0,2	.,.	.,.	.,.	1,0	1,1	1,1	0,5	0,1	0,1	0,1	0,1	.,.
Unigene0004587	184	184	A	G	SNP	.	15138.8	0|1	1|1	0|1	0|1	0|1	1|1	1|1	1|1	1|1	0|1	1|1	0|1	1|1	0|1	0|1	1|1	0|1	0|1	0|1	2,14	3,80	3,13	3,26	6,2	0,3	2,37	0,40	0,8	1,12	0,41	6,18	0,14	2,17	2,19	0,32	3,12	7,5	7,19
Unigene0004587	1262	1262	G	C	SNP	.	10611.6	1|1	1|1	0|1	0|1	0|1	1|1	0|1	0|1	0|1	1|1	0|1	0|1	0|1	0|1	1|1	1|1	0|1	0|1	0|1	0,1	0,33	3,6	3,16	2,10	0,6	8,30	34,17	2,21	0,45	1,11	5,9	2,5	8,2	0,12	1,20	4,12	9,8	5,19
Unigene0004588	553	553	A	G	SNP	.	17022.5	1|1	0|1	1|1	1|1	1|1	1|1	0|1	1|1	1|1	0|1	1|1	1|1	0|1	0|1	0|1	1|1	0|1	0|1	0|1	0,4	43,22	0,13	0,14	0,9	0,39	37,14	0,20	4,36	36,52	0,19	0,13	17,14	27,11	41,27	0,13	12,26	10,7	40,70
Unigene0004592	2643	2643	T	G	SNP	.	5136.1	1|1	0|1	0|1	0|1	0|1	0|1	1|1	.|.	1|1	0|1	0|1	0|1	0|1	1|1	1|1	1|1	1|1	1|1	1|1	0,3	9,5	1,5	3,18	3,1	6,1	0,10	.,.	1,18	5,10	5,10	2,2	3,2	0,9	0,8	0,6	0,10	0,2	0,6
Unigene0004592	2703	2703	T	C	SNP	.	1464.3	.|.	0|1	.|.	.|.	0|0	0|1	1|1	.|.	1|1	0|1	0|1	.|.	0|1	1|1	1|1	1|1	1|1	1|1	1|1	.,.	4,7	.,.	.,.	1,0	2,6	0,2	.,.	0,4	2,1	2,2	.,.	1,2	0,1	0,11	0,1	0,5	0,1	0,1
Unigene0004592	2743	2743	C	T	SNP	.	1061.78	1|1	0|1	.|.	1|1	.|.	1|1	0|0	.|.	0|1	1|1	0|1	.|.	1|1	1|1	0|1	0|1	0|1	1|1	0|0	0,2	6,3	.,.	0,1	.,.	0,6	2,0	.,.	4,2	0,3	2,1	.,.	0,2	0,3	9,5	1,1	3,2	0,1	2,0
Unigene0004594	3483	3483	A	G	SNP	.	5008.64	1|1	0|1	1|1	0|1	0|1	1|1	0|1	1|1	0|1	1|1	1|1	1|1	0|1	0|1	1|1	0|1	1|1	1|1	1|1	0,9	4,9	0,9	5,12	2,8	0,9	2,8	0,3	2,9	0,12	0,12	0,2	1,11	4,6	0,4	2,2	0,4	0,4	0,8
Unigene0004598	749	749	A	G	SNP	.	11738.3	1|1	0|1	0|1	0|1	0|1	1|1	0|1	0|1	1|1	0|1	0|1	0|1	1|1	0|1	1|1	1|1	0|1	1|1	0|1	0,24	2,24	2,18	6,24	5,13	0,7	8,31	2,24	0,22	13,4	11,7	4,7	0,13	18,16	0,19	0,10	5,12	0,6	5,21
Unigene0004598	1029	1029	A	G	SNP	.	5147.06	0|1	0|1	1|1	0|1	0|1	1|1	0|1	0|1	1|1	0|1	0|1	0|1	0|1	0|1	1|1	0|1	1|1	1|1	1|1	4,5	1,9	0,3	3,10	3,9	0,3	1,3	7,3	0,8	1,10	2,9	4,5	2,5	2,21	0,14	3,7	0,7	0,5	0,14
Unigene0004598	1392	1392	C	T	SNP	.	1677.08	1|1	1|1	.|.	0|1	1|1	1|1	0|0	1|1	0|1	.|.	1|1	0|1	1|1	1|1	0|0	1|1	0|1	1|1	0|1	0,1	0,3	.,.	1,8	0,6	0,1	1,0	0,1	5,2	.,.	0,3	1,2	0,4	0,10	6,0	0,1	2,2	0,1	1,3
Unigene0004603	585	585	A	C	SNP	.	102074	0|1	0|1	0|1	0|1	0|1	0|1	0|1	0|1	0|1	1|1	0|1	0|1	1|1	0|1	1|1	1|1	1|1	1|1	1|1	76,72	90136	14107	126,25	43107	24130	57137	35183	73,97	0,78	48106	27,45	0,179	51169	0,144	0,162	0,175	0,180	0,239
Unigene0004607	464	464	A	G	SNP	.	804.73	1|1	0|1	1|1	0|1	0|0	0|1	0|0	1|1	1|1	0|1	0|1	0|0	.|.	0|1	1|1	.|.	1|1	0|0	0|1	0,5	3,1	0,1	3,1	1,0	2,2	1,0	0,4	0,2	4,1	2,2	1,0	.,.	7,1	0,2	.,.	0,1	2,0	2,1
Unigene0004618	683	683	C	G	SNP	.	1887.89	.|.	1|1	0|1	1|1	1|1	0|1	1|1	0|0	0|0	.|.	1|1	1|1	0|1	1|1	1|1	1|1	0|0	.|.	0|1	.,.	0,5	1,1	0,8	0,7	2,3	0,3	3,0	2,0	.,.	0,3	0,8	1,1	0,3	0,2	0,1	1,0	.,.	3,4
Unigene0004618	716	716	A	G	SNP	.	1310.92	0|0	0|1	0|1	1|1	1|1	0|0	1|1	0|0	0|0	1|1	1|1	1|1	0|0	1|1	0|0	1|1	0|1	.|.	0|1	1,0	3,3	1,1	0,9	0,6	4,0	0,1	3,0	3,0	0,1	0,1	0,7	2,0	0,4	2,0	0,1	2,1	.,.	5,1
Unigene0004620	1067	1067	G	T	SNP	.	21765.1	0|1	0|1	0|1	0|1	0|1	0|1	1|1	0|1	1|1	0|1	1|1	0|1	0|1	1|1	0|1	1|1	1|1	0|1	1|1	32,23	34,57	13,23	15,31	16,24	13,14	0,38	10,23	3,62	5,24	0,28	4,12	23,5	0,72	12,22	0,38	0,46	3,11	0,38
Unigene0004631	794	794	G	T	SNP	.	9388.45	0|1	1|1	0|1	1|1	0|1	0|1	1|1	1|1	1|1	0|1	0|1	0|1	0|1	0|1	1|1	1|1	0|1	0|1	0|1	8,18	1,18	1,8	0,19	2,4	3,3	0,13	0,6	1,15	1,12	2,12	5,13	5,6	10,16	0,41	0,6	3,13	2,6	1,8
Unigene0004632	187	187	T	C	SNP	.	1625.57	.|.	1|1	1|1	1|1	0|1	1|1	0|1	.|.	0|1	0|0	0|1	1|1	0|0	0|1	1|1	1|1	1|1	0|1	1|1	.,.	0,9	0,2	0,1	2,1	0,1	1,4	.,.	1,2	3,0	3,3	0,2	7,0	3,3	0,8	0,1	0,4	3,2	0,1
Unigene0004632	379	379	T	C	SNP	.	7154.2	1|1	0|1	0|1	0|1	1|1	0|1	0|1	1|1	0|1	1|1	0|1	1|1	1|1	0|1	0|1	0|1	0|1	0|1	0|1	0,7	46,42	7,8	17,4	0,8	10,16	18,17	0,13	37,13	0,7	9,13	0,8	0,10	16,7	20,6	11,10	7,13	12,4	5,6
Unigene0004636	172	172	A	T	SNP	.	3542.94	1|1	1|1	1|1	1|1	0|0	0|1	0|1	0|1	0|1	1|1	0|1	0|1	0|1	1|1	0|1	.|.	1|1	.|.	0|0	0,7	0,3	0,3	0,6	2,0	0,10	2,4	3,25	1,3	0,13	1,2	1,2	1,9	0,4	4,8	.,.	0,1	.,.	13,1
Unigene0004636	875	875	A	G	SNP	.	6314.49	1|1	0|1	1|1	1|1	0|1	1|1	1|1	0|1	0|1	0|1	1|1	1|1	0|1	0|1	0|1	0|1	1|1	1|1	1|1	0,23	24,14	0,4	0,7	2,2	0,10	0,10	36,14	4,15	3,4	0,13	0,2	2,4	4,6	18,9	1,3	0,9	0,1	0,24
Unigene0004639	171	171	C	T	SNP	.	2556.38	1|1	1|1	0|1	0|1	.|.	1|1	0|1	1|1	0|1	1|1	1|1	0|0	1|1	0|1	0|1	1|1	1|1	1|1	0|1	0,8	0,4	1,3	7,1	.,.	0,2	3,6	0,1	3,6	0,2	0,4	3,0	0,4	9,5	2,9	0,5	0,2	0,2	5,1
Unigene0004639	190	190	A	G	SNP	.	1928.07	1|1	1|1	0|1	0|1	.|.	0|1	0|1	1|1	0|1	1|1	0|1	0|0	1|1	0|1	0|1	1|1	1|1	.|.	0|1	0,9	0,4	2,3	9,1	.,.	1,1	4,5	0,1	5,6	0,1	4,1	4,0	0,3	9,2	3,8	0,4	0,4	.,.	5,3
Unigene0004645	234	234	C	T	SNP	.	2243.24	0|0	.|.	1|1	1|1	0|1	.|.	0|1	0|1	1|1	0|0	1|1	0|1	1|1	0|1	0|1	0|1	1|1	1|1	1|1	18,0	.,.	0,4	0,9	4,1	.,.	4,5	3,2	1,5	14,1	0,1	4,2	0,3	13,4	8,5	6,2	0,6	0,2	0,4
Unigene0004645	254	254	G	A	SNP	.	4179.92	0|0	1|1	1|1	1|1	0|1	1|1	0|1	0|1	0|1	0|1	1|1	0|1	1|1	0|1	0|1	0|1	0|1	1|1	0|1	17,1	0,1	0,4	0,13	5,3	0,2	5,10	4,3	3,10	12,4	0,5	4,4	0,5	14,10	8,10	6,5	1,10	0,5	1,9
Unigene0004645	1639	1639	C	A	SNP	.	5527.72	0|1	0|1	0|1	0|1	0|1	0|1	1|1	1|1	1|1	1|1	0|1	0|1	1|1	0|1	0|1	0|1	0|1	1|1	0|1	0,1	5,5	3,4	2,19	2,1	4,4	0,9	0,1	0,6	0,11	1,11	2,5	0,11	2,18	2,8	2,3	1,13	0,3	2,14
Unigene0004645	1821	1821	A	G	SNP	.	11436.6	1|1	0|1	0|1	0|1	0|1	0|1	1|1	1|1	1|1	0|1	1|1	0|1	1|1	0|1	0|1	1|1	1|1	0|1	1|1	0,31	11,10	5,6	5,34	2,10	5,5	1,16	0,21	0,11	6,21	0,16	2,7	0,11	3,23	4,20	0,5	0,36	1,5	2,28
Unigene0004648	271	271	C	T	SNP	.	8521.23	0|1	1|1	0|1	0|1	0|1	1|1	0|1	0|1	1|1	0|1	1|1	0|1	1|1	0|1	0|1	1|1	0|1	1|1	0|1	1,4	0,22	8,15	6,18	5,6	0,13	3,7	2,7	0,12	1,11	0,12	4,13	0,7	2,15	7,18	0,14	9,5	0,7	3,8
Unigene0004662	167	167	G	C	SNP	.	674.17	1|1	0|1	.|.	0|1	0|0	0|1	0|1	1|1	.|.	1|1	1|1	0|0	1|1	0|0	1|1	0|0	.|.	0|1	1|1	0,2	4,4	.,.	4,3	2,0	24,3	3,2	0,1	.,.	0,1	0,1	5,0	0,2	10,0	0,1	4,0	.,.	2,2	0,2
Unigene0004664	41	41	A	C	SNP	.	643.67	.|.	0|1	.|.	1|1	.|.	1|1	.|.	0|0	1|1	.|.	.|.	1|1	1|1	1|1	1|1	.|.	.|.	.|.	1|1	.,.	1,2	.,.	0,3	.,.	0,1	.,.	1,0	0,2	.,.	.,.	0,1	0,4	0,1	0,1	.,.	.,.	.,.	0,2
Unigene0004683	2001	2001	A	G	SNP	.	6270.85	1|1	1|1	0|1	0|1	0|1	1|1	0|0	0|1	1|1	0|1	0|1	0|1	1|1	0|1	1|1	0|1	0|1	1|1	0|1	0,14	0,36	3,9	1,13	4,12	0,12	10,0	1,4	0,6	4,9	2,6	4,8	0,11	3,19	0,3	1,6	1,2	0,8	1,6
Unigene0004689	63	63	A	T	SNP	.	11681.4	1|1	0|1	1|1	0|1	0|1	1|1	0|1	1|1	1|1	1|1	0|1	0|1	1|1	1|1	1|1	0|1	1|1	1|1	1|1	0,10	13,51	0,8	6,19	5,7	0,17	20,11	0,16	0,20	0,16	3,15	3,6	0,13	0,16	0,20	9,8	0,13	0,14	0,21
Unigene0004689	168	168	A	T	SNP	.	2209.31	0|0	0|1	0|1	0|1	1|1	1|1	1|1	0|0	0|1	0|1	0|1	1|1	0|1	1|1	0|1	0|1	0|1	1|1	0|0	8,0	26,18	3,1	13,2	0,4	0,3	0,12	4,0	14,5	3,1	11,3	0,1	1,3	2,5	11,1	2,8	9,2	0,3	10,0
Unigene0004689	185	185	C	T	SNP	.	4435.83	1|1	0|1	0|1	0|1	0|0	1|1	0|0	1|1	1|1	1|1	0|1	0|1	1|1	1|1	1|1	0|1	1|1	1|1	1|1	0,6	9,28	1,2	2,9	3,0	0,5	6,0	0,6	0,15	0,4	2,7	1,1	0,2	0,1	0,10	3,2	0,8	0,2	0,8
Unigene0004689	435	435	G	A	SNP	.	3748.54	0|0	0|1	1|1	1|1	1|1	0|1	1|1	1|1	1|1	0|1	1|1	0|1	0|1	0|1	1|1	1|1	0|1	0|0	0|1	7,0	5,11	0,3	0,11	0,2	3,5	0,13	0,4	0,4	6,1	0,6	2,2	5,1	12,7	0,12	0,5	4,6	8,0	1,4
Unigene0004692	482	482	A	G	SNP	.	2196.07	0|1	1|1	1|1	1|1	1|1	.|.	1|1	0|1	0|1	0|1	1|1	1|1	1|1	1|1	.|.	1|1	0|1	.|.	.|.	5,1	0,5	0,4	0,12	0,5	.,.	0,4	6,3	2,3	1,3	0,5	0,3	0,3	0,3	.,.	0,1	1,4	.,.	.,.
Unigene0004697	1270	1270	C	G	SNP	.	5648.32	1|1	0|1	1|1	0|1	0|1	0|1	0|1	1|1	0|1	0|1	1|1	0|1	1|1	1|1	0|1	0|1	1|1	0|1	0|1	0,4	10,23	0,19	9,4	3,10	1,4	7,21	0,4	2,10	1,5	0,2	1,5	0,4	0,14	11,1	4,15	0,5	3,2	2,7
Unigene0004697	1273	1273	A	G	SNP	.	8047.88	1|1	0|1	1|1	0|1	1|1	0|1	1|1	1|1	1|1	0|1	1|1	1|1	1|1	1|1	0|1	1|1	1|1	0|1	1|1	0,4	10,23	0,20	7,6	0,13	1,3	0,29	0,4	0,13	1,5	0,2	0,6	0,4	0,14	7,5	0,20	0,6	2,3	0,10
Unigene0004697	1380	1380	C	T	SNP	.	1951.73	1|1	0|0	0|1	0|1	0|0	1|1	0|1	1|1	1|1	1|1	0|1	0|0	1|1	0|1	1|1	1|1	1|1	0|0	1|1	0,2	8,0	3,1	5,2	2,0	0,2	2,1	0,5	0,9	0,4	1,1	2,0	0,1	2,3	0,1	0,3	0,8	1,0	0,8
Unigene0004705	87	87	A	G	SNP	.	8853.53	0|1	1|1	1|1	1|1	0|1	0|1	1|1	0|1	1|1	0|1	0|1	0|1	1|1	0|1	0|1	1|1	0|1	1|1	1|1	11,12	0,44	0,8	0,9	5,7	3,4	0,20	13,15	1,19	9,21	6,5	1,5	0,7	1,10	1,3	0,20	1,5	0,14	0,10
Unigene0004705	134	134	A	G	SNP	.	18098.6	0|1	0|1	1|1	1|1	0|1	0|1	0|1	0|1	1|1	0|1	0|1	0|1	1|1	0|1	1|1	0|1	1|1	1|1	1|1	14,30	8,78	0,24	2,43	9,17	4,13	17,15	34,11	0,37	8,48	8,5	2,11	0,30	7,12	0,10	8,20	0,24	0,30	0,40
Unigene0004705	819	819	G	A	SNP	.	11797.5	0|1	1|1	0|1	0|1	1|1	1|1	0|1	1|1	0|1	0|1	0|1	1|1	0|1	1|1	0|1	0|1	0|1	0|1	0|1	6,18	3,64	10,10	39,8	0,12	1,18	7,24	0,30	9,16	28,37	13,15	0,4	37,14	0,22	13,21	18,9	11,4	26,6	28,12
Unigene0004708	53	53	A	C	SNP	.	2908.82	0|1	1|1	1|1	0|1	0|1	0|1	1|1	0|1	1|1	0|1	0|1	0|1	0|1	0|1	.|.	1|1	0|1	1|1	1|1	5,3	0,10	0,2	5,4	1,3	2,2	0,5	3,7	0,6	1,3	3,6	1,5	4,5	9,6	.,.	0,2	1,7	0,1	0,6
Unigene0004714	331	331	C	G	SNP	.	4101.27	1|1	0|1	0|1	0|1	0|1	0|1	0|0	1|1	1|1	1|1	1|1	0|1	1|1	0|1	1|1	0|0	0|1	.|.	1|1	0,21	2,10	4,9	2,11	1,3	1,3	3,0	0,4	0,9	0,2	0,3	1,4	0,4	6,7	0,2	1,0	4,3	.,.	0,7
Unigene0004714	343	343	C	T	SNP	.	3663.62	1|1	0|1	0|1	0|1	0|1	0|1	0|0	1|1	1|1	1|1	1|1	0|1	1|1	0|1	1|1	0|0	0|1	.|.	1|1	0,18	3,9	4,8	2,12	1,2	1,2	3,0	0,3	0,9	0,3	0,1	1,3	0,3	7,5	0,2	1,0	4,2	.,.	0,6
Unigene0004714	427	427	G	A	SNP	.	4308.56	1|1	0|1	0|1	0|1	1|1	0|1	0|0	1|1	0|1	0|1	0|1	1|1	1|1	0|1	1|1	1|1	0|1	0|1	0|1	0,21	3,11	6,5	5,5	0,6	3,2	2,0	0,2	2,8	1,3	1,2	1,12	0,4	2,11	0,8	0,2	5,12	1,1	11,5
Unigene0004719	1076	1076	T	G	SNP	.	1797.28	1|1	1|1	1|1	0|1	0|1	0|1	0|1	0|0	0|1	1|1	0|1	1|1	1|1	0|1	1|1	0|1	0|1	.|.	0|1	0,3	0,15	0,3	1,3	1,1	1,1	3,2	1,0	1,5	0,2	3,2	0,1	0,1	8,6	0,5	2,1	3,3	.,.	2,4
Unigene0004721	178	178	G	T	SNP	.	3576.18	.|.	1|1	0|1	0|1	0|1	0|1	1|1	1|1	1|1	1|1	1|1	0|1	0|1	0|1	0|1	0|1	0|1	.|.	1|1	.,.	0,2	6,3	3,16	2,4	7,5	0,2	0,3	0,5	0,2	0,2	1,1	3,1	9,14	1,4	4,4	1,10	.,.	0,11
Unigene0004727	159	159	A	C	SNP	.	3758.57	1|1	0|1	1|1	1|1	1|1	1|1	1|1	1|1	0|0	1|1	0|1	1|1	0|1	1|1	1|1	1|1	1|1	0|1	1|1	0,14	18,4	0,3	0,9	0,6	0,2	0,2	0,1	27,2	0,9	12,4	0,1	4,2	0,4	0,5	0,3	0,4	8,3	0,9
Unigene0004728	1073	1073	A	T	SNP	.	8926.54	1|1	0|1	0|1	1|1	1|1	0|1	1|1	1|1	0|1	1|1	0|1	1|1	0|1	1|1	0|1	1|1	0|1	1|1	0|1	0,17	8,21	2,6	0,29	0,7	2,10	0,13	0,12	2,10	0,18	5,16	0,6	13,6	0,34	8,11	0,7	4,14	0,4	4,5
Unigene0004728	1096	1096	C	T	SNP	.	6510.67	1|1	0|1	0|1	1|1	1|1	0|1	1|1	1|1	0|1	1|1	0|1	1|1	0|1	1|1	0|1	1|1	0|1	1|1	0|1	0,16	6,11	2,5	0,22	0,3	2,11	0,11	0,7	1,8	0,17	3,7	0,2	6,7	0,23	7,1	0,5	4,12	0,4	3,4
Unigene0004729	1825	1825	T	-	Deletion	.	1692.3	0|1	0|1	0|1	0|1	1|1	0|1	1|1	0|1	1|1	.|.	0|1	1|1	1|1	0|1	1|1	.|.	1|1	1|1	1|1	3,2	4,6	1,2	7,2	0,1	2,1	0,4	1,5	0,2	.,.	1,3	0,3	0,3	1,6	0,2	.,.	0,6	0,2	0,3
Unigene0004745	1206	1206	A	C	SNP	.	2389	0|1	0|1	1|1	1|1	1|1	1|1	1|1	0|0	0|1	0|1	0|1	1|1	0|1	0|1	0|1	1|1	1|1	0|1	1|1	2,1	4,10	0,3	0,4	0,3	0,2	0,3	9,0	1,3	1,4	1,6	0,1	3,2	4,10	2,2	0,4	0,4	1,1	0,2
Unigene0004745	1380	1380	G	T	SNP	.	2900.17	0|1	0|1	.|.	1|1	0|1	1|1	1|1	0|1	1|1	1|1	0|0	0|1	1|1	0|1	1|1	1|1	0|1	1|1	0|1	2,13	1,5	.,.	0,1	2,2	0,1	1,4	2,20	0,5	0,1	2,0	1,2	0,3	3,4	0,3	0,1	1,7	0,4	1,4
Unigene0004752	831	831	T	C	SNP	.	2877.08	1|1	0|1	1|1	0|1	0|1	1|1	1|1	0|1	0|1	.|.	1|1	0|1	0|1	0|1	0|1	.|.	0|1	1|1	0|1	0,3	4,1	0,5	3,8	7,3	0,1	0,1	1,3	3,2	.,.	0,4	3,1	7,0	7,4	9,4	.,.	8,5	0,1	3,2
Unigene0004752	906	906	A	G	SNP	.	1757.48	1|1	1|1	0|0	0|1	0|1	.|.	0|1	1|1	1|1	.|.	1|1	0|1	1|1	0|1	0|1	1|1	0|1	.|.	0|1	0,6	0,6	1,0	2,2	4,3	.,.	1,3	0,3	0,4	.,.	0,3	3,1	0,2	7,4	6,6	0,1	1,3	.,.	1,2
Unigene0004756	956	956	C	T	SNP	.	5267.18	1|1	1|1	1|1	0|1	0|1	0|1	1|1	0|1	1|1	0|1	1|1	1|1	1|1	0|1	0|1	1|1	1|1	1|1	1|1	0,11	0,13	0,10	7,5	2,1	1,8	0,7	6,2	0,6	4,6	0,7	2,10	0,7	17,9	13,6	0,1	0,9	0,5	0,4
Unigene0004756	998	998	C	T	SNP	.	4674.51	1|1	0|1	0|0	1|1	0|1	0|1	1|1	0|1	0|1	0|1	0|1	0|1	0|1	1|1	1|1	1|1	1|1	0|0	1|1	0,13	11,7	7,0	0,17	2,3	8,5	0,2	5,3	12,4	4,4	9,5	7,4	8,2	0,23	0,19	0,1	0,5	7,0	0,10
Unigene0004757	20	20	C	G	SNP	.	832.85	1|1	0|1	0|1	1|1	1|1	1|1	0|0	1|1	0|1	0|0	0|0	.|.	1|1	1|1	0|0	0|0	1|1	0|1	0|1	0,1	5,1	3,1	0,4	0,1	0,1	2,0	0,2	1,2	1,0	1,0	.,.	0,3	0,2	2,0	1,0	0,2	1,1	1,2
Unigene0004757	122	122	A	G	SNP	.	3157.07	1|1	1|1	0|1	1|1	1|1	0|1	0|1	1|1	0|1	1|1	1|1	1|1	1|1	1|1	0|1	0|1	1|1	0|0	1|1	0,1	0,22	3,5	0,5	0,6	2,2	4,1	0,1	5,1	0,6	0,3	0,4	0,4	0,4	4,4	6,2	0,3	5,0	0,6
Unigene0004768	1259	1259	C	T	SNP	.	1435.66	1|1	1|1	0|1	0|1	0|1	1|1	0|1	1|1	0|1	0|0	1|1	0|1	.|.	0|1	1|1	.|.	0|1	0|0	0|1	0,1	0,4	2,1	4,2	2,1	0,4	2,2	0,1	3,3	1,0	0,1	2,2	.,.	8,8	0,2	.,.	10,4	.	3,3
Unigene0004768	1353	1353	C	G	SNP	.	2384.65	1|1	1|1	0|1	0|1	0|0	1|1	0|1	1|1	0|1	.|.	1|1	1|1	.|.	0|1	1|1	.|.	0|1	1|1	0|1	0,6	0,7	4,2	5,5	3,0	0,9	1,1	0,4	6,8	.,.	0,2	0,1	.,.	10,9	0,4	.,.	7,6	0,1	2,4
Unigene0004768	1592	1592	A	T	SNP	.	2050.49	.|.	1|1	0|0	0|1	0|0	1|1	1|1	.|.	0|1	.|.	1|1	.|.	1|1	0|1	1|1	1|1	0|1	1|1	0|1	.,.	0,8	7,0	4,4	5,0	0,2	0,5	.,.	10,6	.,.	0,7	.,.	0,2	12,9	0,4	0,1	12,8	0,1	2,3
Unigene0004768	1868	1868	C	T	SNP	.	906.02	1|1	0|0	0|1	1|1	1|1	0|1	1|1	0|0	1|1	1|1	0|0	1|1	1|1	0|1	.|.	0|0	1|1	1|1	1|1	0,1	1,0	1,2	0,2	0,1	1,1	0,2	1,0	0,3	0,1	3,0	0,1	0,2	4,6	.,.	1,0	0,4	0,1	0,2
Unigene0004768	1904	1904	C	T	SNP	.	926.59	0|0	0|1	0|1	0|1	1|1	0|0	0|1	0|0	0|1	1|1	0|1	1|1	0|1	0|1	1|1	0|0	1|1	1|1	1|1	2,0	1,1	7,2	3,1	0,2	6,0	3,1	1,0	1,2	0,1	6,1	0,1	1,2	11,3	0,3	2,0	0,6	0,1	0,2
Unigene0004769	876	876	A	T	SNP	.	6739.15	1|1	0|1	0|1	1|1	0|1	0|1	0|1	1|1	1|1	0|1	0|1	0|1	0|1	0|1	1|1	0|1	1|1	1|1	1|1	0,10	2,19	8,9	0,16	11,11	4,2	5,13	0,15	0,13	4,2	5,7	8,10	1,6	7,11	0,3	5,14	0,7	0,2	0,14
Unigene0004769	2190	2190	C	G	SNP	.	8488.32	0|1	0|1	0|1	0|1	1|1	0|1	1|1	0|1	0|1	0|1	1|1	1|1	1|1	1|1	0|1	0|1	0|1	0|1	0|1	5,15	2,8	4,5	6,19	0,18	1,8	0,5	4,4	2,9	2,8	0,12	0,22	0,9	0,17	7,14	2,6	8,8	1,5	3,14
Unigene0004769	2191	2191	C	G	SNP	.	8634.32	0|1	0|1	0|1	0|1	1|1	0|1	1|1	0|1	0|1	0|1	1|1	1|1	1|1	1|1	0|1	0|1	0|1	0|1	0|1	5,15	2,8	4,5	6,19	0,18	1,8	0,5	4,4	2,9	2,8	0,12	0,22	0,9	0,17	7,14	2,6	8,8	1,5	3,14
Unigene0004773	408	408	G	T	SNP	.	10233.4	1|1	1|1	0|1	1|1	0|0	0|1	0|0	0|1	0|1	0|1	0|1	0|0	0|1	1|1	1|1	1|1	0|1	0|1	0|0	0,4	2127	6,2	0,3	42,3	6,20	80,7	0,8	87,29	35,16	22,10	17,1	23,3	0,13	0,21	0,26	4,1	13,6	83,5
Unigene0004779	1163	1163	C	T	SNP	.	2529.8	0|0	0|1	0|0	0|1	0|0	0|1	1|1	0|1	0|1	1|1	0|1	0|1	1|1	0|1	0|1	1|1	1|1	0|0	1|1	13,1	3,8	6,0	4,7	2,0	4,6	0,3	2,1	11,1	0,3	2,3	1,3	0,9	3,15	8,10	0,1	0,5	1,0	0,1
Unigene0004793	296	296	C	G	SNP	.	5122.75	0|1	1|1	.|.	0|1	0|0	1|1	0|1	1|1	0|0	1|1	0|1	0|1	1|1	0|1	1|1	0|0	.|.	0|1	1|1	4,15	1,18	.,.	3,9	3,0	0,5	15,14	0,32	14,1	0,6	3,3	1,2	0,7	5,4	0,1	4,0	.,.	1,4	0,1
Unigene0004793	461	461	C	T	SNP	.	6633.93	0|1	0|0	1|1	1|1	0|1	1|1	0|1	1|1	0|1	1|1	0|1	1|1	1|1	0|1	.|.	0|1	1|1	1|1	1|1	13,13	3,0	0,2	0,7	5,3	0,6	4,10	0,8	9,7	0,5	1,4	0,2	0,13	2,3	.,.	1,8	0,13	0,4	0,46
Unigene0004793	753	753	A	G	SNP	.	11337.4	0|1	0|1	1|1	0|1	0|1	1|1	0|1	1|1	0|1	1|1	0|1	0|1	1|1	0|1	.|.	0|1	1|1	1|1	1|1	4,31	8,27	0,10	4,16	8,5	0,18	16,16	0,48	22,10	0,11	3,9	4,1	0,25	10,8	.,.	6,8	0,7	0,11	0,39
Unigene0004793	1713	1713	A	G	SNP	.	2376.38	0|1	0|1	.|.	0|1	0|1	1|1	0|1	1|1	0|0	1|1	0|0	0|1	1|1	0|0	0|1	0|1	1|1	1|1	1|1	7,3	21,5	.,.	9,6	12,2	0,5	15,3	0,13	39,2	0,7	4,0	7,1	0,3	18,1	17,2	12,2	0,4	0,1	0,12
Unigene0004793	1742	1742	A	G	SNP	.	4491.17	0|1	0|1	1|1	0|1	0|1	1|1	0|1	1|1	0|1	0|1	0|1	0|1	1|1	0|1	0|1	0|1	1|1	1|1	1|1	7,7	21,6	0,1	10,14	12,1	0,8	16,10	0,24	37,5	0,11	3,2	9,1	0,6	17,2	16,2	12,4	0,6	0,2	0,15
Unigene0004793	2007	2007	A	G	SNP	.	9188.85	1|1	1|1	0|0	1|1	0|1	0|1	1|1	1|1	1|1	1|1	1|1	0|1	1|1	1|1	1|1	1|1	0|1	1|1	0|1	0,8	0,11	4,0	0,10	3,1	11,4	0,22	0,37	0,17	0,20	0,6	3,0	0,15	0,3	0,5	0,7	1,8	0,11	22,26
Unigene0004793	2774	2774	C	G	SNP	.	3136.49	0|1	0|1	1|1	0|1	0|1	1|1	0|1	1|1	0|1	1|1	0|1	0|1	.|.	0|1	0|0	0|1	1|1	1|1	1|1	14,4	21,2	0,2	8,6	17,7	0,3	22,2	0,12	30,6	0,10	7,3	10,2	.,.	7,4	2,0	13,4	0,3	0,7	0,14
Unigene0004799	892	892	A	C	SNP	.	4207.97	1|1	0|1	1|1	0|1	0|1	0|1	0|1	1|1	1|1	1|1	0|1	0|1	0|1	0|1	0|1	0|1	1|1	0|1	1|1	0,6	4,9	0,5	5,9	2,3	1,3	4,5	0,9	0,6	0,11	5,6	3,5	2,5	2,16	1,8	1,5	0,4	2,2	0,5
Unigene0004799	909	909	A	T	SNP	.	3868.28	0|1	1|1	0|1	0|1	1|1	1|1	0|1	0|1	0|1	1|1	0|1	1|1	0|1	0|1	0|1	0|1	0|1	1|1	0|1	3,3	1,14	2,3	5,11	0,6	0,4	2,8	10,4	7,2	0,9	1,10	0,7	5,3	6,9	2,7	5,3	1,5	0,4	1,4
Unigene0004805	107	107	T	-	Deletion	.	2426.97	0|1	1|1	0|1	0|1	1|1	1|1	1|1	1|1	0|1	1|1	0|1	1|1	.|.	0|1	1|1	1|1	1|1	.|.	1|1	13,3	0,7	1,2	4,3	0,4	0,4	0,4	0,1	1,5	0,9	2,6	0,3	.,.	6,7	0,8	0,3	0,8	.,.	0,2
Unigene0004810	174	174	C	T	SNP	.	4492.74	1|1	0|1	1|1	0|1	0|0	1|1	0|1	1|1	1|1	1|1	0|1	0|1	0|1	0|1	1|1	0|1	0|1	0|1	1|1	0,14	5,6	0,7	3,13	1,0	0,3	2,6	0,8	0,6	0,3	4,4	2,3	1,9	2,8	0,15	1,5	2,9	3,2	0,6
Unigene0004812	483	483	A	T	SNP	.	2694.99	.|.	0|0	1|1	1|1	0|1	1|1	0|0	1|1	0|1	.|.	0|0	0|1	0|0	1|1	1|1	0|1	0|1	0|0	0|1	.,.	19,0	0,5	0,7	14,3	0,4	14,0	0,10	8,15	.,.	5,0	5,5	9,0	1,4	0,1	5,2	11,4	2,0	44,23
Unigene0004813	121	121	C	T	SNP	.	1833.49	.|.	1|1	1|1	0|1	.|.	1|1	1|1	1|1	0|0	.|.	1|1	1|1	1|1	0|1	0|1	0|1	1|1	1|1	1|1	.,.	0,6	0,1	16,6	.,.	0,1	0,4	0,2	1,0	.,.	0,4	0,3	0,2	7,7	3,5	1,1	0,3	0,2	0,1
Unigene0004813	188	188	G	T	SNP	.	3118.87	1|1	1|1	.|.	0|0	1|1	1|1	0|1	.|.	0|1	.|.	1|1	1|1	1|1	0|1	0|1	0|1	1|1	1|1	1|1	0,8	0,5	.,.	15,1	0,1	0,4	2,1	.,.	4,9	.,.	0,3	0,3	0,8	16,5	9,13	3,7	0,7	0,1	0,5
Unigene0004818	115	115	C	T	SNP	.	3742.58	.|.	1|1	1|1	0|1	1|1	0|0	1|1	1|1	0|1	.|.	1|1	0|1	1|1	0|1	.|.	.|.	0|1	1|1	0|0	.,.	0,16	0,15	14,17	0,5	5,0	0,3	0,13	12,2	.,.	0,4	10,12	0,4	15,11	.,.	.,.	10,5	0,1	2,0
Unigene0004818	813	813	T	C	SNP	.	8581.54	1|1	0|1	0|1	0|1	0|1	1|1	0|1	1|1	1|1	1|1	0|1	0|1	1|1	0|1	1|1	0|0	1|1	1|1	1|1	0,40	5,8	9,6	6,8	11,5	0,10	3,2	1,45	0,20	0,7	3,7	7,3	0,8	4,19	0,5	3,0	0,19	0,3	0,8
Unigene0004818	1099	1099	T	A	SNP	.	594.29	0|0	0|1	1|1	1|1	1|1	.|.	1|1	0|0	0|0	0|0	.|.	1|1	.|.	1|1	.|.	.|.	.|.	.|.	.|.	22,0	1,4	0,1	0,2	0,4	.,.	0,1	10,0	1,0	1,0	.,.	0,3	.,.	0,1	.,.	.,.	.,.	.,.	.,.
Unigene0004818	1520	1520	C	T	SNP	.	1111.42	0|0	0|0	.|.	1|1	1|1	1|1	.|.	0|1	1|1	.|.	.|.	1|1	0|1	1|1	0|0	0|0	1|1	0|1	1|1	6,0	8,0	.,.	0,4	0,3	0,2	.,.	37,5	0,2	.,.	.,.	0,4	4,1	0,3	10,0	1,0	0,5	3,1	0,2
Unigene0004818	1533	1533	C	G	SNP	.	702.33	0|0	0|0	.|.	1|1	1|1	.|.	.|.	0|0	1|1	0|0	.|.	1|1	0|0	1|1	0|0	0|0	1|1	0|0	1|1	4,0	9,0	.,.	0,3	0,3	.,.	.,.	25,1	0,1	1,0	.,.	0,3	4,0	0,1	10,0	1,0	0,3	2,0	0,1
Unigene0004854	2049	2049	A	G	SNP	.	3377.67	0|1	1|1	0|1	0|1	0|1	0|1	0|1	.|.	0|1	0|0	1|1	1|1	0|1	1|1	.|.	1|1	1|1	0|1	1|1	1,5	0,8	5,1	1,9	1,2	6,1	1,1	.,.	1,4	3,0	0,6	0,4	4,3	0,26	.,.	0,2	0,15	6,1	0,4
Unigene0004854	2251	2251	T	C	SNP	.	1510.72	1|1	1|1	0|1	1|1	1|1	0|1	.|.	.|.	1|1	0|0	1|1	1|1	0|0	1|1	.|.	.|.	1|1	0|0	.|.	0,2	0,3	8,1	0,6	0,1	4,2	.,.	.,.	0,3	2,0	0,1	0,2	6,0	0,9	.,.	.,.	0,7	1,0	.,.
Unigene0004854	2269	2269	C	T	SNP	.	1247.42	1|1	1|1	0|0	1|1	1|1	0|1	.|.	0|0	1|1	0|0	1|1	1|1	0|0	1|1	.|.	.|.	1|1	0|0	.|.	0,1	0,3	10,0	0,4	0,1	5,1	.,.	1,0	0,1	2,0	0,2	0,1	5,0	0,8	.,.	.,.	0,7	1,0	.,.
Unigene0004858	1300	1300	C	T	SNP	.	32270.3	1|1	0|1	0|1	1|1	1|1	0|1	0|1	0|1	0|1	1|1	0|1	1|1	0|1	0|1	0|1	0|1	0|1	1|1	0|1	0,73	24109	20,34	0,52	0,27	12,37	12,14	2,21	34144	1,21	21,16	0,8	31,43	44,51	5,11	12,14	54,55	0,20	115102
Unigene0004862	1326	1326	C	T	SNP	.	1362.87	1|1	0|1	1|1	0|1	0|0	0|1	0|1	1|1	1|1	1|1	0|1	0|0	1|1	0|1	0|1	.|.	0|1	.|.	0|1	0,4	2,5	0,2	1,1	3,0	2,1	3,1	0,2	0,3	0,2	2,3	1,0	0,3	1,4	2,5	.,.	4,2	.,.	1,3
Unigene0004864	117	117	A	G	SNP	.	2773.22	1|1	1|1	1|1	0|1	1|1	1|1	0|1	1|1	0|1	.|.	1|1	0|0	1|1	0|1	0|1	.|.	0|0	1|1	0|1	0,10	0,7	0,5	2,7	0,2	0,1	2,8	0,4	2,2	.,.	0,8	1,0	0,6	1,2	1,5	.,.	1,0	0,4	2,4
Unigene0004882	1370	1370	A	G	SNP	.	2573.35	0|1	0|1	0|1	1|1	0|1	1|1	0|0	1|1	0|0	1|1	1|1	0|1	1|1	0|1	0|1	0|1	0|1	1|1	1|1	7,5	7,3	3,5	0,10	2,2	0,4	5,0	0,7	13,0	0,1	0,1	4,2	0,5	7,8	3,4	1,2	3,4	0,2	0,2
Unigene0004882	1488	1488	A	T	SNP	.	4049.37	1|1	0|1	1|1	1|1	0|1	1|1	1|1	1|1	1|1	1|1	0|1	0|1	1|1	0|1	0|1	1|1	1|1	1|1	1|1	0,10	7,2	0,6	0,12	5,4	0,6	0,3	0,11	0,8	0,4	3,3	4,3	0,5	5,6	1,2	0,3	0,15	0,2	0,3
Unigene0004882	1504	1504	A	G	SNP	.	2072.8	1|1	0|0	1|1	1|1	0|1	1|1	1|1	0|1	1|1	1|1	0|1	0|1	1|1	0|1	0|0	1|1	1|1	1|1	1|1	0,5	6,0	0,3	0,6	4,1	0,3	0,2	3,4	0,6	0,1	1,3	2,3	0,5	4,4	1,0	0,3	0,7	0,1	0,1
Unigene0004883	1319	1319	G	T	SNP	.	1779.47	1|1	1|1	1|1	0|1	1|1	1|1	0|1	1|1	1|1	0|1	0|1	1|1	0|1	1|1	0|1	0|1	0|1	0|1	0|1	0,4	0,5	0,1	9,8	0,1	0,4	5,3	0,5	0,2	6,1	4,3	0,2	2,1	0,3	1,2	2,1	6,5	1,3	6,1
Unigene0004896	441	441	G	T	SNP	.	7865.78	1|1	0|1	0|1	1|1	0|1	1|1	0|1	.|.	0|1	1|1	0|1	0|1	0|1	0|1	1|1	1|1	0|0	0|1	0|0	0,7	7,8	6,16	0,11	10,32	0,9	2,5	.,.	3,21	0,28	2,16	5,30	3,14	3,4	0,8	0,3	7,0	1,9	1,0
Unigene0004896	1290	1290	A	G	SNP	.	18796.2	1|1	0|1	0|1	0|1	0|1	0|1	0|1	1|1	0|1	0|1	0|1	0|1	0|1	1|1	0|1	1|1	1|1	0|1	1|1	0,28	35,52	20,37	8,18	30,70	13,7	4,30	0,57	12,26	1,13	7,28	29,44	23,26	0,21	1,7	1,23	1,15	5,6	0,10
Unigene0004898	343	343	C	T	SNP	.	9906.15	1|1	0|1	1|1	0|1	0|1	0|1	0|1	0|1	1|1	0|1	0|1	0|1	1|1	0|1	1|1	0|1	1|1	1|1	1|1	0,9	8,18	0,14	24,15	9,5	5,13	4,16	1,5	0,25	3,9	7,9	8,13	0,6	12,35	0,24	5,16	0,24	0,3	0,10
Unigene0004898	1271	1271	G	T	SNP	.	5231.22	1|1	1|1	0|1	1|1	0|1	0|1	0|1	1|1	0|1	1|1	1|1	0|1	1|1	0|1	1|1	1|1	0|1	1|1	0|1	0,4	0,9	5,5	0,18	7,3	1,10	3,12	0,4	14,10	0,2	0,2	10,6	0,3	5,19	0,5	0,11	16,2	0,5	6,5
Unigene0004901	184	184	G	T	SNP	.	17112.3	1|1	1|1	0|1	0|1	1|1	1|1	0|1	0|1	0|1	1|1	1|1	1|1	1|1	1|1	0|1	0|1	1|1	1|1	1|1	0,21	0,40	6,7	2,12	0,34	0,18	11,42	27,22	29,19	0,36	0,22	0,14	0,21	0,35	2,7	7,34	0,13	0,16	0,42
Unigene0004901	1585	1585	C	T	SNP	.	6024.21	0|0	0|1	1|1	1|1	0|1	1|1	0|1	0|1	1|1	1|1	1|1	0|1	1|1	1|1	1|1	0|1	0|1	0|1	0|1	8,0	7,19	0,7	0,13	3,8	0,3	4,13	2,16	0,15	0,11	0,9	2,4	0,8	0,9	0,10	3,6	1,3	1,4	2,1
Unigene0004905	206	206	A	G	SNP	.	1798.89	1|1	0|1	0|1	0|1	0|0	1|1	0|1	1|1	0|1	1|1	1|1	0|0	1|1	0|1	1|1	.|.	0|1	1|1	0|1	0,11	1,1	1,2	2,1	2,0	0,2	4,2	0,4	1,3	0,4	0,2	1,0	0,8	5,1	0,4	.,.	1,2	0,2	1,2
Unigene0004905	404	404	A	G	SNP	.	2093.3	0|1	0|1	1|1	1|1	1|1	0|1	0|1	1|1	0|1	1|1	1|1	1|1	1|1	1|1	0|1	.|.	1|1	1|1	1|1	1,9	2,7	0,1	0,1	0,2	2,2	1,2	0,3	1,4	0,3	0,5	0,1	0,5	0,2	2,2	.,.	0,3	0,1	0,3
Unigene0004906	102	102	A	G	SNP	.	4564.64	1|1	1|1	1|1	0|1	1|1	0|1	1|1	1|1	0|1	0|1	0|1	1|1	0|1	0|1	0|1	0|1	0|1	0|1	0|1	0,1	0,27	0,8	10,7	0,3	3,3	0,13	0,8	4,5	3,5	1,2	0,2	1,4	1,11	4,8	4,5	5,4	3,2	4,3
Unigene0004907	527	527	G	A	SNP	.	20216.1	1|1	0|1	1|1	0|1	1|1	0|1	0|1	0|1	0|1	0|1	1|1	1|1	1|1	0|1	0|1	0|1	0|1	1|1	0|0	0,14	183,51	0,2	5,7	0,5	8,2	30125	10,95	36,16	95,46	2,37	0,6	0,15	1,1	17,26	37104	1,3	0,48	1,0
Unigene0004907	590	590	A	G	SNP	.	17613.5	1|1	0|1	.|.	0|0	.|.	0|0	0|1	1|1	0|1	0|1	0|1	.|.	0|1	0|0	1|1	0|1	1|1	1|1	1|1	0,4	16179	.,.	3,0	.,.	5,0	42,35	0,60	17,6	77,63	20,4	.,.	4,9	2,0	1,33	39,58	0,1	1,30	0,1
Unigene0004910	1388	1388	C	G	SNP	.	963.25	0|0	0|0	0|0	0|1	1|1	1|1	0|1	.|.	1|1	1|1	0|0	1|1	1|1	0|1	0|1	.|.	0|1	0|0	1|1	3,0	7,1	1,0	2,5	0,1	0,1	3,1	.,.	0,2	0,3	1,0	0,2	0,2	11,3	5,5	.,.	1,3	1,0	0,4
Unigene0004911	805	805	T	C	SNP	.	2518.59	1|1	0|1	0|1	0|1	.|.	1|1	0|0	1|1	0|1	1|1	1|1	1|1	1|1	0|1	.|.	0|1	0|1	1|1	1|1	0,10	2,4	3,2	3,5	.,.	0,9	1,0	0,8	3,3	0,6	0,2	0,2	0,2	11,8	.,.	2,2	2,4	0,1	0,2
Unigene0004911	1862	1862	A	G	SNP	.	2984.16	0|1	0|1	0|1	0|1	0|1	1|1	0|1	0|1	1|1	0|1	0|1	0|1	1|1	1|1	1|1	1|1	1|1	1|1	1|1	1,10	1,8	1,1	8,10	1,1	0,1	1,3	3,7	0,1	1,3	3,3	1,5	0,2	0,7	0,9	0,3	0,5	0,1	0,3
Unigene0004918	121	121	C	T	SNP	.	10229.4	1|1	0|1	1|1	1|1	1|1	0|1	1|1	1|1	0|1	1|1	0|1	0|1	0|1	0|1	1|1	1|1	0|1	0|1	0|1	0,20	26,39	0,5	5,72	0,4	10,19	1,18	0,10	8,9	0,5	4,12	1,9	3,7	17,28	0,23	0,8	4,23	3,5	10,31
Unigene0004918	904	904	T	A	SNP	.	11101.7	1|1	1|1	0|1	0|1	0|0	0|1	0|1	1|1	0|1	1|1	1|1	1|1	0|1	0|1	0|1	0|1	0|1	1|1	0|1	0,43	0,31	1,2	6,51	1,0	2,13	1,8	0,5	1,10	0,10	1,19	0,5	3,10	7,45	8,5	2,4	5,22	0,1	9,24
Unigene0004918	1168	1168	G	T	SNP	.	2767.43	1|1	1|1	0|1	0|1	0|1	0|1	1|1	1|1	0|0	1|1	0|1	1|1	0|1	0|1	0|1	0|0	0|1	0|1	0|1	0,2	0,12	1,1	7,16	2,1	2,9	0,3	0,5	7,0	0,3	5,1	0,2	4,5	6,9	4,4	2,0	9,1	1,1	9,2
Unigene0004918	1186	1186	C	T	SNP	.	5394.66	1|1	1|1	0|1	0|1	0|1	0|1	1|1	1|1	0|0	1|1	0|1	1|1	0|1	0|1	0|1	0|0	0|0	0|1	0|1	0,6	0,17	2,3	11,34	2,2	3,17	0,7	0,8	7,0	0,9	5,6	0,3	4,7	9,15	2,13	3,0	16,1	1,1	11,6
Unigene0004918	1303	1303	C	T	SNP	.	7927.72	1|1	1|1	0|0	0|1	1|1	0|1	1|1	1|1	0|1	1|1	0|1	1|1	0|1	1|1	0|1	0|1	0|1	0|1	0|1	0,23	0,28	1,0	9,38	0,2	4,20	0,3	0,9	2,4	0,10	7,15	0,5	4,5	0,25	3,8	1,1	5,11	2,6	7,13
Unigene0004919	126	126	G	T	SNP	.	1123.68	0|0	1|1	0|0	1|1	0|1	0|1	1|1	0|0	.|.	.|.	0|0	0|0	1|1	0|0	1|1	1|1	.|.	1|1	.|.	14,0	0,3	2,0	0,10	11,4	2,1	0,7	10,0	.,.	.,.	11,0	10,0	0,1	26,0	0,2	0,5	.,.	0,1	.,.
Unigene0004923	144	144	T	G	SNP	.	781.19	.|.	0|1	0|0	0|1	1|1	1|1	0|0	.|.	1|1	1|1	.|.	1|1	.|.	1|1	.|.	.|.	0|1	.|.	0|0	.,.	1,1	1,0	1,2	0,2	0,1	1,0	.,.	0,2	0,1	.,.	0,1	.,.	0,3	.,.	.,.	1,7	.,.	2,0
Unigene0004923	1249	1249	G	A	SNP	.	390.25	1|1	0|1	0|0	0|0	1|1	.|.	0|0	0|0	0|1	.|.	1|1	.|.	1|1	1|1	.|.	.|.	.|.	1|1	1|1	0,1	1,1	2,0	2,0	0,1	.,.	1,0	2,0	1,2	.,.	0,1	.,.	0,1	0,1	.,.	.,.	.,.	0,2	0,2
Unigene0004926	277	277	C	G	SNP	.	22596.5	0|1	0|1	0|1	0|1	1|1	1|1	1|1	.|.	0|1	1|1	1|1	.|.	0|1	0|1	0|1	0|1	0|1	1|1	0|1	3,12	11,17	3,13	71,92	0,10	1,31	0,5	.,.	7,9	0,3	0,27	.,.	6,12	83165	14,15	21,9	21,30	0,7	107147
Unigene0004928	79	79	A	G	SNP	.	6163.25	.|.	.|.	1|1	1|1	0|1	1|1	.|.	1|1	0|1	0|1	.|.	0|1	.|.	1|1	.|.	0|1	1|1	.|.	.|.	.,.	.,.	0,18	0,15	44,22	0,6	.,.	0,49	1,2	3,2	.,.	135,38	.,.	0,2	.,.	12,11	0,1	.,.	.,.
Unigene0004928	274	274	G	A	SNP	.	19255.8	1|1	1|1	0|1	1|1	0|1	1|1	1|1	1|1	0|1	1|1	.|.	0|1	.|.	0|0	.|.	0|1	1|1	.|.	.|.	0,3	0,3	4,32	0,42	76113	1,24	0,1	0,121	2,23	0,8	.,.	162142	.,.	3,0	.,.	6,27	0,2	.,.	.,.
Unigene0004931	1716	1716	A	C	SNP	.	1527.5	0|0	1|1	0|1	1|1	0|1	1|1	0|1	0|0	1|1	0|1	1|1	0|1	0|0	0|1	0|1	0|0	0|0	1|1	0|1	1,0	0,4	2,1	0,5	3,3	0,2	3,3	2,0	0,4	3,1	1,3	1,4	4,0	6,6	1,2	2,0	2,0	0,1	3,2
Unigene0004933	115	115	G	T	SNP	.	7003.37	1|1	0|1	0|1	0|1	0|1	0|1	1|1	1|1	1|1	1|1	0|1	0|1	0|1	0|1	0|1	0|1	1|1	1|1	1|1	0,20	14,16	10,2	22,27	3,3	13,9	0,29	0,23	0,10	0,8	7,7	7,7	3,2	23,8	2,1	3,11	0,11	0,4	0,11
Unigene0004933	1563	1563	G	C	SNP	.	8457.44	1|1	1|1	0|1	1|1	0|1	1|1	0|1	1|1	0|1	1|1	1|1	0|1	1|1	0|1	0|1	0|1	0|1	1|1	0|1	0,16	0,14	2,6	0,26	8,5	0,7	8,9	0,7	8,4	0,13	0,6	1,4	0,8	4,12	3,15	11,6	2,7	1,0	3,10
Unigene0004933	1582	1582	C	T	SNP	.	10392.7	1|1	1|1	0|1	1|1	0|1	1|1	0|1	1|1	0|1	1|1	1|1	0|1	1|1	0|1	0|1	0|1	0|1	1|1	0|1	0,26	0,24	2,6	0,29	8,6	0,10	8,15	0,13	9,6	0,20	0,9	1,7	0,9	4,18	3,20	14,7	2,13	1,3	3,14
Unigene0004941	1292	1292	A	T	SNP	.	8713.04	1|1	0|1	1|1	1|1	1|1	0|1	0|1	1|1	0|1	1|1	0|1	1|1	0|1	0|1	0|1	0|1	0|1	1|1	0|1	0,14	8,21	0,1	2,22	0,12	6,2	2,25	1,17	4,8	0,29	3,14	0,6	3,8	4,25	3,2	5,11	5,7	0,7	6,3
Unigene0004946	1213	1213	C	T	SNP	.	4678.88	0|1	1|1	1|1	1|1	0|1	0|1	0|1	0|1	0|1	0|1	0|1	0|1	1|1	1|1	0|1	0|1	1|1	1|1	1|1	18,9	0,8	0,2	0,2	11,1	2,2	14,5	2,6	12,23	12,6	26,6	7,2	0,5	0,6	3,8	1,3	0,12	.	0,19
Unigene0004946	1225	1225	G	A	SNP	.	5044.13	0|1	1|1	1|1	1|1	0|1	0|1	0|1	0|1	0|1	0|1	0|1	0|1	1|1	1|1	0|1	0|1	1|1	1|1	1|1	22,10	0,12	0,2	0,5	12,1	2,3	18,2	2,8	11,20	16,5	25,11	8,3	0,6	0,2	5,4	2,5	0,15	0,4	0,18
Unigene0004946	2089	2089	A	T	SNP	.	14509.5	1|1	0|1	0|1	1|1	0|1	0|1	1|1	1|1	1|1	0|1	0|1	0|1	1|1	1|1	1|1	1|1	0|1	0|1	0|1	0,2	23102	12,8	0,24	22,14	15,25	0,27	0,37	0,89	14,11	14,16	5,7	0,7	0,12	0,22	0,24	13,22	9,1	19,40
Unigene0004948	733	733	A	G	SNP	.	46734.6	1|1	1|1	0|1	1|1	1|1	0|1	1|1	1|1	1|1	0|1	0|1	1|1	0|1	1|1	0|1	0|1	0|1	0|1	0|1	0,35	0,143	3,13	0,82	0,82	10,19	0,103	0,43	1104	22,69	3,21	0,28	12,47	0,73	12,85	10,41	7,39	23,15	17,69
Unigene0004948	754	754	A	G	SNP	.	46927.6	1|1	1|1	0|1	1|1	1|1	0|1	1|1	1|1	1|1	0|1	0|1	1|1	0|1	1|1	0|1	0|1	0|1	0|1	0|1	0,36	0,149	3,14	0,81	0,82	12,19	0,103	0,53	1,98	28,61	3,19	0,33	15,44	0,72	10,81	9,43	7,36	24,18	15,73
Unigene0004951	1323	1323	T	C	SNP	.	1725.59	0|1	0|1	1|1	1|1	1|1	1|1	0|1	0|1	0|1	0|0	0|1	0|1	0|0	1|1	.|.	0|1	0|1	0|1	1|1	12,3	7,1	0,1	0,11	0,2	0,3	1,2	6,3	1,3	3,0	4,1	2,1	2,0	0,4	.,.	3,3	5,5	1,4	0,4
Unigene0004954	196	196	C	T	SNP	.	1073.97	0|1	0|1	1|1	0|1	0|0	0|0	1|1	1|1	0|1	0|1	0|1	1|1	0|1	0|1	.|.	1|1	0|1	.|.	1|1	3,5	2,4	0,3	1,1	1,0	1,0	0,2	0,2	1,1	1,1	2,1	0,1	2,1	3,2	.,.	0,1	1,4	.,.	0,2
Unigene0004963	258	258	C	T	SNP	.	519.09	0|0	0|0	1|1	0|0	1|1	0|0	0|0	0|0	1|1	1|1	.|.	1|1	0|0	0|1	0|0	0|0	.|.	.|.	1|1	7,0	4,0	0,1	23,2	0,4	2,0	5,0	82,0	0,4	0,1	.,.	0,1	1,0	7,1	1,0	12,0	.,.	.,.	0,3
Unigene0004972	358	358	A	G	SNP	.	2990.68	0|1	1|1	0|1	0|1	0|1	0|1	0|1	1|1	1|1	1|1	1|1	1|1	1|1	0|1	1|1	1|1	0|1	1|1	0|1	3,3	0,17	1,2	1,1	2,3	1,1	1,4	0,2	0,10	0,3	0,3	0,2	0,8	1,2	0,1	0,1	1,1	0,4	3,4
Unigene0004972	394	394	A	G	SNP	.	814.06	1|1	0|1	1|1	1|1	1|1	.|.	1|1	.|.	0|0	0|0	.|.	1|1	0|0	.|.	1|1	1|1	0|1	1|1	0|1	0,4	13,2	0,1	0,5	0,2	.,.	0,4	.,.	5,0	1,0	.,.	0,1	2,0	.,.	0,1	0,1	4,1	0,1	3,1
Unigene0004972	1185	1185	A	G	SNP	.	916.16	.|.	0|1	1|1	1|1	1|1	.|.	0|1	0|0	0|1	1|1	1|1	1|1	1|1	1|1	0|1	1|1	0|1	.|.	0|0	.,.	1,1	0,1	0,3	0,2	.,.	1,1	1,0	1,1	0,1	0,1	0,3	0,1	0,4	2,2	0,2	1,1	.,.	2,0
Unigene0004977	178	178	C	T	SNP	.	2280.42	1|1	1|1	0|0	0|1	0|0	1|1	0|0	1|1	1|1	.|.	0|1	0|1	.|.	0|1	0|1	0|0	0|1	1|1	0|1	0,4	0,13	7,0	4,4	2,0	0,8	7,0	0,1	0,7	.,.	3,5	4,1	.,.	7,2	4,5	1,0	1,6	0,1	1,2
Unigene0004977	196	196	C	T	SNP	.	3195.78	1|1	1|1	0|0	0|1	0|1	1|1	0|0	1|1	1|1	1|1	0|1	0|0	0|1	0|1	0|1	0|1	0|1	.|.	0|1	0,6	0,14	7,0	4,4	3,2	0,9	10,1	0,1	0,14	0,4	3,4	4,0	2,1	5,1	5,6	2,2	3,9	.,.	1,4
Unigene0004980	1291	1291	C	-	Deletion	.	1065.65	1|1	0|1	1|1	0|1	1|1	0|0	0|1	1|1	0|1	1|1	0|1	0|1	0|1	0|1	0|0	0|1	0|1	.|.	1|1	0,2	1,1	0,6	8,5	0,1	1,0	1,4	0,1	1,3	0,3	1,3	2,1	3,2	4,2	7,0	4,1	3,2	.,.	0,1
Unigene0004990	905	905	G	A	SNP	.	2985.91	1|1	0|1	1|1	1|1	0|1	0|1	1|1	1|1	0|1	1|1	0|1	0|1	1|1	1|1	0|1	0|1	0|0	1|1	0|1	0,1	8,1	0,4	0,9	1,2	2,2	0,5	0,6	3,7	0,2	1,3	6,4	0,3	0,6	4,3	2,4	4,0	0,5	13,7
Unigene0004997	1668	1668	A	G	SNP	.	17602.1	0|0	1|1	1|1	1|1	1|1	1|1	0|1	0|1	0|1	1|1	1|1	0|1	0|1	1|1	1|1	1|1	0|1	1|1	1|1	22,1	0,67	0,25	0,20	1,44	0,25	11,50	28,9	8,26	0,3	0,39	5,19	5,42	1,33	0,3	0,10	5,15	0,28	0,18
Unigene0004997	1810	1810	T	G	SNP	.	1333.42	1|1	0|0	.|.	0|0	1|1	.|.	0|1	1|1	1|1	.|.	0|0	1|1	1|1	0|1	.|.	.|.	1|1	.|.	1|1	0,8	11,0	.,.	1,0	0,1	.,.	1,4	0,4	0,1	.,.	1,0	0,3	0,4	1,5	.,.	.,.	0,3	.,.	0,1
Unigene0004997	1824	1824	G	A	SNP	.	568.39	1|1	0|0	.|.	0|0	1|1	.|.	1|1	1|1	1|1	.|.	.|.	1|1	1|1	0|1	.|.	.|.	1|1	.|.	.|.	0,3	7,0	.,.	1,0	0,1	.,.	0,1	0,2	0,1	.,.	.,.	0,1	0,1	1,2	.,.	.,.	0,1	.,.	.,.
Unigene0004998	130	130	A	T	SNP	.	2667.89	.|.	1|1	1|1	.|.	1|1	.|.	1|1	1|1	0|1	0|1	1|1	.|.	0|1	0|0	0|1	0|1	0|1	0|0	0|1	.,.	0,8	0,2	.,.	0,3	.,.	0,7	0,12	3,4	44,16	0,3	.,.	3,4	1,0	2,3	10,4	1,1	14,0	11,3
Unigene0004998	632	632	T	C	SNP	.	7110.05	1|1	0|1	1|1	0|1	0|1	.|.	1|1	0|1	1|1	1|1	0|1	0|1	1|1	1|1	0|1	1|1	1|1	1|1	1|1	0,2	42,18	0,7	10,2	8,4	.,.	1,18	21,33	0,13	0,50	27,3	2,3	0,6	0,1	4,1	0,10	0,1	0,5	0,15
Unigene0004998	650	650	T	C	SNP	.	4818.25	1|1	0|1	1|1	0|1	0|1	.|.	1|1	1|1	1|1	1|1	0|0	0|0	1|1	.|.	0|0	1|1	.|.	.|.	1|1	0,1	44,9	0,3	10,1	9,3	.,.	0,14	0,41	0,10	0,30	21,1	1,0	0,1	.,.	4,0	0,6	.,.	.,.	0,11
Unigene0004998	788	788	T	C	SNP	.	2316.63	.|.	0|0	.|.	0|0	0|1	.|.	1|1	1|1	1|1	1|1	0|0	0|0	.|.	.|.	0|0	1|1	.|.	1|1	.|.	.,.	23,1	.,.	6,0	5,2	.,.	0,5	0,27	0,1	0,21	19,0	4,0	.,.	.,.	2,0	0,1	.,.	0,4	.,.
Unigene0005009	749	749	C	A	SNP	.	7061.18	1|1	1|1	0|1	0|1	0|1	1|1	0|1	1|1	0|1	1|1	1|1	0|1	0|1	0|1	0|1	0|0	1|1	0|1	1|1	0,29	0,29	3,6	3,6	1,7	0,10	13,2	0,15	5,9	0,5	0,9	4,3	8,11	13,21	5,8	3,0	0,16	2,4	0,8
Unigene0005015	371	371	C	G	SNP	.	14224.3	1|1	0|1	1|1	1|1	1|1	1|1	1|1	1|1	0|1	1|1	1|1	1|1	0|1	1|1	0|1	0|1	0|0	0|1	0|0	0,6	216,34	0,14	0,35	0,5	0,27	0,32	0,13	44,19	0,46	0,28	0,5	65,27	0,40	111,29	80,13	74,6	39,16	155,7
Unigene0005019	100	100	C	G	SNP	.	947.27	0|0	1|1	0|1	.|.	0|0	.|.	1|1	.|.	0|1	0|0	1|1	0|1	1|1	1|1	0|1	1|1	0|1	.|.	0|1	3,0	0,2	1,2	.,.	1,0	.,.	0,1	.,.	5,2	1,0	0,1	1,1	0,4	0,6	2,2	0,1	1,4	.,.	2,1
Unigene0005021	111	111	G	A	SNP	.	4276.44	1|1	1|1	0|1	1|1	1|1	1|1	1|1	1|1	1|1	1|1	0|1	1|1	0|1	1|1	1|1	1|1	0|1	0|1	0|1	0,7	0,4	1,5	0,17	0,2	0,2	0,1	0,2	1,4	0,3	2,2	0,4	3,7	0,14	0,25	0,7	6,4	1,2	6,6
Unigene0005021	600	600	C	T	SNP	.	22842.1	1|1	0|1	0|1	0|1	0|1	1|1	0|1	1|1	1|1	0|1	0|1	0|1	0|1	0|1	0|1	0|1	1|1	0|1	1|1	0,56	34,36	15,12	16,52	13,15	0,15	24,26	0,11	0,41	13,10	12,18	7,20	4,21	23,56	43,27	19,8	0,103	8,7	0,91
Unigene0005035	175	175	C	G	SNP	.	832.62	1|1	0|0	1|1	0|0	.|.	1|1	1|1	1|1	1|1	1|1	1|1	.|.	.|.	0|1	1|1	1|1	1|1	.|.	1|1	0,2	1,0	0,1	2,0	.,.	0,1	0,1	0,2	0,1	0,3	0,1	.,.	.,.	1,2	0,4	0,1	0,1	.,.	0,1
Unigene0005035	240	240	A	C	SNP	.	1300.09	1|1	1|1	0|1	0|1	1|1	1|1	0|1	0|0	0|0	1|1	0|1	1|1	1|1	0|1	0|1	0|0	0|0	0|1	0|1	0,2	0,4	1,4	1,7	0,2	0,1	3,2	3,0	3,0	0,3	6,1	0,2	0,1	5,3	5,1	6,0	1,0	2,3	1,1
Unigene0005045	208	208	C	T	SNP	.	1096.02	0|0	0|1	0|1	0|1	0|1	1|1	0|1	1|1	0|1	0|1	0|0	1|1	.|.	0|1	0|0	0|1	1|1	1|1	1|1	2,0	6,1	2,3	6,1	1,1	1,2	1,1	0,2	3,4	3,1	1,0	0,2	.,.	4,2	7,0	2,1	0,5	0,2	0,2
Unigene0005045	1103	1103	A	C	SNP	.	1549.58	0|0	0|1	0|0	1|1	0|1	1|1	0|1	1|1	0|1	0|0	0|1	0|1	.|.	1|1	0|1	1|1	0|1	1|1	0|1	2,0	3,8	1,0	0,4	2,3	0,1	2,1	0,1	1,4	2,0	3,7	1,3	.,.	0,4	1,1	0,2	1,3	0,2	1,3
Unigene0005045	1181	1181	G	T	SNP	.	825.29	0|0	0|1	0|0	1|1	.|.	1|1	1|1	.|.	1|1	.|.	1|1	1|1	1|1	1|1	.|.	1|1	0|0	0|0	1|1	1,0	1,4	2,0	0,4	.,.	0,2	0,1	.,.	0,1	.,.	0,3	0,1	0,1	0,1	.,.	0,1	1,0	1,0	0,1
Unigene0005045	1183	1183	A	G	SNP	.	825.29	0|0	0|1	0|0	1|1	.|.	1|1	1|1	.|.	1|1	.|.	1|1	1|1	1|1	1|1	.|.	1|1	0|0	0|0	1|1	1,0	1,4	2,0	0,4	.,.	0,2	0,1	.,.	0,1	.,.	0,3	0,1	0,1	0,1	.,.	0,1	1,0	1,0	0,1
Unigene0005045	1314	1314	A	G	SNP	.	2970.03	1|1	0|1	0|1	1|1	0|1	0|1	0|1	1|1	1|1	0|1	0|1	0|1	1|1	0|1	1|1	1|1	1|1	0|1	1|1	0,5	4,7	1,4	0,8	2,3	2,4	1,2	0,4	0,3	1,2	2,5	4,4	0,9	5,8	0,1	0,1	0,6	1,4	0,1
Unigene0005049	323	323	G	T	SNP	.	19688.5	0|1	1|1	0|1	0|1	1|1	0|1	0|1	0|1	1|1	1|1	0|1	1|1	0|1	0|1	1|1	1|1	0|1	0|1	0|1	23,36	0,47	24,17	50,51	0,24	12,20	13,61	16,7	2,40	4,55	15,19	0,15	9,10	34,57	0,10	0,19	29,25	12,14	33,31
Unigene0005050	221	221	C	T	SNP	.	3879.56	1|1	0|1	1|1	0|1	0|1	0|1	0|1	1|1	0|1	1|1	0|0	0|0	1|1	0|1	0|1	0|1	0|1	1|1	1|1	0,7	18,2	0,4	12,6	4,3	3,2	4,5	0,11	4,5	0,3	4,0	4,1	0,7	10,5	2,25	1,2	1,6	0,4	0,9
Unigene0005054	290	290	A	G	SNP	.	12192.6	0|0	1|1	1|1	0|1	0|1	0|1	0|1	0|1	0|1	0|1	0|1	0|1	0|1	1|1	1|1	0|1	1|1	0|1	1|1	56,0	0,24	0,17	12,26	3,4	9,10	6,21	18,7	4,19	6,9	8,11	6,15	13,7	0,51	0,33	4,15	0,37	1,5	0,14
Unigene0005055	2696	2696	A	C	SNP	.	1806.14	1|1	0|1	1|1	0|0	0|1	0|1	0|1	1|1	0|1	.|.	1|1	0|0	0|1	0|1	1|1	0|1	0|1	0|1	1|1	0,9	4,4	0,2	5,0	5,3	2,7	8,2	0,10	3,4	.,.	0,3	5,0	3,2	5,2	0,1	2,1	7,2	2,1	0,1
Unigene0005063	1319	1319	A	G	SNP	.	4762.35	1|1	1|1	0|1	0|1	0|1	1|1	0|1	1|1	0|1	0|1	1|1	1|1	0|1	1|1	1|1	0|1	0|1	0|1	0|1	0,2	0,16	5,6	4,10	7,5	0,3	2,4	0,1	2,9	10,3	0,3	0,2	1,2	0,16	0,12	1,3	4,16	1,3	1,9
Unigene0005065	289	289	A	G	SNP	.	739.23	0|1	.|.	1|1	1|1	1|1	0|1	.|.	0|0	.|.	.|.	.|.	1|1	.|.	1|1	.|.	.|.	.|.	.|.	1|1	8,4	.,.	0,5	0,4	0,1	1,1	.,.	6,0	.,.	.,.	.,.	0,2	.,.	0,3	.,.	.,.	.,.	.,.	0,1
Unigene0005067	995	995	C	G	SNP	.	1854.78	0|0	1|1	1|1	.|.	1|1	1|1	.|.	0|0	.|.	.|.	1|1	1|1	1|1	1|1	0|0	.|.	1|1	1|1	1|1	10,0	0,1	.	.,.	0,3	0,4	.,.	1,0	.,.	.,.	0,3	0,1	0,2	0,16	1,0	.,.	0,5	0,1	0,4
Unigene0005067	1001	1001	C	T	SNP	.	1935.28	0|0	1|1	1|1	.|.	1|1	1|1	.|.	0|0	.|.	.|.	1|1	1|1	1|1	1|1	0|0	.|.	1|1	1|1	1|1	10,0	0,2	0,2	.,.	0,3	0,4	.,.	1,0	.,.	.,.	0,3	0,1	0,2	0,16	1,0	.,.	0,5	0,1	0,4
Unigene0005067	1120	1120	C	T	SNP	.	1908.21	0|0	0|1	0|1	1|1	1|1	0|1	1|1	0|0	0|1	.|.	0|1	0|1	0|1	1|1	0|0	.|.	1|1	1|1	1|1	2,0	1,3	1,5	0,1	0,5	1,5	.	2,0	2,3	.,.	3,3	1,4	1,5	0,10	1,0	.,.	0,5	0,1	0,6
Unigene0005068	289	289	C	T	SNP	.	1186.93	0|1	0|0	.|.	1|1	1|1	0|1	0|1	1|1	1|1	1|1	0|0	1|1	.|.	1|1	.|.	.|.	0|1	0|1	.|.	3,5	4,0	.,.	0,7	0,2	2,1	4,1	0,2	0,2	0,2	1,0	0,1	.,.	0,6	.,.	.,.	3,2	1,1	.,.
Unigene0005079	685	685	G	A	SNP	.	652.37	.|.	0|1	1|1	0|1	.|.	0|0	.|.	1|1	0|0	0|0	0|0	1|1	1|1	.|.	1|1	1|1	.|.	1|1	1|1	.,.	2,6	0,1	2,3	.,.	2,0	.,.	0,3	1,0	12,0	1,0	0,1	0,1	.,.	0,1	0,1	.,.	0,1	0,1
Unigene0005090	325	325	A	G	SNP	.	1900.21	1|1	1|1	1|1	1|1	0|0	1|1	0|1	.|.	0|1	1|1	1|1	.|.	0|0	0|1	0|1	1|1	0|1	.|.	0|1	0,8	0,5	0,2	0,4	1,0	0,4	1,1	.,.	2,5	0,10	0,2	.,.	1,0	2,1	3,1	0,1	2,4	.,.	5,1
Unigene0005090	338	338	A	G	SNP	.	951.98	0|0	1|1	1|1	1|1	0|0	1|1	0|0	.|.	0|1	1|1	1|1	.|.	0|0	0|1	0|1	.|.	0|1	.|.	0|0	5,0	0,3	0,2	0,4	1,0	0,3	1,0	.,.	2,3	0,6	0,1	.,.	2,0	2,2	3,1	.,.	2,2	.,.	3,0
Unigene0005108	679	679	G	A	SNP	.	41923.3	1|1	1|1	0|1	1|1	1|1	0|1	1|1	1|1	0|1	0|1	0|1	1|1	0|1	1|1	1|1	1|1	1|1	0|1	1|1	3,77	2,70	70,82	0,113	1,57	175,47	1,61	1,53	96,60	243,47	279,48	0,61	317,40	0,52	0,60	1,92	0,93	336,39	0,59
Unigene0005108	764	764	A	T	SNP	.	26091.2	0|1	1|1	0|1	1|1	1|1	0|0	0|1	0|1	0|1	0|0	0|0	1|1	0|0	0|1	1|1	1|1	1|1	0|0	1|1	17,37	2,46	90,9	1,24	0,76	211,5	4,43	28,75	119,48	387,3	395,29	0,67	415,25	10,79	0,109	0,50	1,18	411,18	0,59
Unigene0005108	881	881	T	G	SNP	.	44284	1|1	.|.	0|0	.|.	1|1	0|0	1|1	.|.	0|1	1|1	1|1	1|1	0|1	.|.	1|1	.|.	0|1	0|1	1|1	0,1	.,.	83,2	.,.	0,1	207,1	0,2	.,.	57,43	0,311	2426	0,1	163214	.,.	0,3	.,.	1,1	101262	0,1
Unigene0005108	1060	1060	T	A	SNP	.	993.56	.|.	1|1	1|1	.|.	.|.	1|1	.|.	.|.	0|0	.|.	0|0	.|.	1|1	0|0	0|0	1|1	.|.	1|1	0|0	.,.	0,1	0,2	.,.	.,.	0,12	.,.	.,.	1,0	.,.	1,0	.,.	0,5	1,0	1,0	0,1	.,.	0,4	1,0
Unigene0005108	1061	1061	T	G	SNP	.	993.56	.|.	1|1	1|1	.|.	.|.	1|1	.|.	.|.	0|0	.|.	0|0	.|.	1|1	0|0	0|0	1|1	.|.	1|1	0|0	.,.	0,1	0,2	.,.	.,.	0,12	.,.	.,.	0,0	.,.	.	.,.	0,5	.	.	0,1	.,.	0,4	.
Unigene0005114	335	335	C	T	SNP	.	2059.6	1|1	0|0	1|1	0|1	1|1	1|1	0|1	1|1	1|1	1|1	1|1	1|1	1|1	.|.	.|.	0|1	.|.	1|1	0|1	0,1	3,0	0,4	5,9	0,4	0,1	2,2	0,2	0,1	0,7	0,1	0,4	0,1	.,.	.,.	1,6	.,.	0,1	4,13
Unigene0005118	566	566	A	G	SNP	.	33287.5	0|1	1|1	1|1	0|1	1|1	1|1	1|1	0|1	0|1	1|1	0|1	1|1	1|1	0|1	1|1	1|1	0|1	1|1	0|1	13,31	0,62	0,52	20,51	0,53	0,26	0,68	43,14	15,69	0,73	7,25	0,48	0,38	16,62	0,55	0,37	21,59	0,23	16,66
Unigene0005119	1491	1491	G	A	SNP	.	5950.86	1|1	1|1	0|1	0|1	1|1	0|1	0|1	1|1	0|1	1|1	0|1	1|1	0|1	0|1	0|1	0|1	0|1	0|1	0|1	0,12	0,16	4,5	9,9	0,3	1,5	7,12	0,15	2,14	0,3	2,5	0,3	4,9	13,14	5,10	1,4	2,4	1,5	10,24
Unigene0005126	323	323	C	T	SNP	.	2227.73	1|1	1|1	1|1	1|1	0|1	0|1	1|1	1|1	1|1	.|.	0|0	0|1	1|1	0|1	0|1	1|1	0|1	0|1	0|1	0,4	0,2	0,2	0,14	1,2	3,7	0,1	0,1	0,2	.,.	1,0	1,1	0,3	4,8	2,4	0,1	1,3	1,2	4,6
Unigene0005131	762	762	C	T	SNP	.	14022.3	.|.	1|1	1|1	0|1	1|1	1|1	0|0	.|.	0|1	0|0	1|1	1|1	1|1	1|1	0|1	0|0	0|0	0|1	0|0	.,.	1,52	0,23	55,73	1,27	1,15	13,0	.,.	7,7	13,0	0,10	0,48	0,15	1,37	10,14	16,0	25,0	7,6	13,0
Unigene0005131	772	772	T	C	SNP	.	14125.6	.|.	1|1	1|1	0|1	1|1	1|1	0|0	.|.	0|1	0|0	1|1	1|1	1|1	1|1	0|1	0|0	0|0	0|1	0|0	.,.	1,53	0,23	54,68	1,28	1,17	13,0	.,.	6,7	14,0	0,11	0,51	0,15	0,38	10,14	16,0	26,0	5,6	13,0
Unigene0005131	931	931	A	G	SNP	.	1743.16	.|.	1|1	1|1	0|1	1|1	1|1	0|0	.|.	0|0	0|1	1|1	1|1	1|1	1|1	0|1	0|1	0|0	1|1	0|0	.,.	0,5	0,4	62,9	0,2	0,1	11,0	.,.	8,0	2,2	0,3	0,10	0,4	0,6	5,1	11,2	9,0	0,2	7,0
Unigene0005131	945	945	G	A	SNP	.	854.51	.|.	1|1	1|1	0|0	1|1	.|.	0|0	.|.	0|0	0|1	1|1	1|1	1|1	1|1	0|1	0|1	0|0	1|1	0|0	.,.	0,2	0,2	66,3	0,1	.,.	12,0	.,.	9,0	2,2	0,1	0,1	0,1	0,1	5,1	10,1	8,0	0,1	6,0
Unigene0005131	1075	1075	A	G	SNP	.	783.82	.|.	1|1	1|1	0|0	1|1	1|1	0|1	.|.	0|0	1|1	.|.	1|1	.|.	1|1	.|.	0|1	.|.	1|1	.|.	.,.	0,1	0,1	99,0	.	0,1	15,4	.,.	12,0	0,6	.,.	.	.,.	.	.,.	18,3	.,.	0,3	.,.
Unigene0005131	1162	1162	A	G	SNP	.	1120.03	.|.	1|1	0|1	0|0	1|1	1|1	0|1	.|.	0|0	0|1	.|.	1|1	1|1	1|1	.|.	0|1	.|.	0|0	.|.	.,.	0,5	1,3	60,3	0,2	0,2	18,7	.,.	7,0	2,4	.,.	0,3	0,1	0,2	.,.	6,4	.,.	2,0	.,.
Unigene0005136	1064	1064	A	T	SNP	.	2787.25	0|1	1|1	1|1	1|1	1|1	1|1	1|1	0|1	0|1	1|1	1|1	1|1	0|0	1|1	0|0	0|1	1|1	0|1	1|1	5,6	0,6	0,3	0,2	0,3	0,1	0,3	5,3	1,8	0,4	0,6	0,4	2,0	0,5	1,0	4,4	0,10	1,4	0,2
Unigene0005146	255	255	A	G	SNP	.	4845.82	0|1	1|1	1|1	0|1	1|1	0|1	1|1	0|0	0|1	0|1	1|1	0|1	1|1	0|1	0|1	1|1	0|1	1|1	0|1	13,2	0,30	0,5	6,10	0,2	5,5	0,3	5,0	1,8	2,1	0,10	3,7	0,10	2,10	5,11	0,5	3,7	0,4	7,3
Unigene0005146	337	337	G	T	SNP	.	2819.35	1|1	1|1	1|1	1|1	.|.	0|1	.|.	1|1	1|1	0|0	1|1	1|1	1|1	0|1	1|1	1|1	1|1	.|.	0|1	0,4	0,13	0,1	0,6	.,.	1,4	.,.	0,1	0,6	1,0	0,7	0,2	0,1	1,5	0,11	0,1	0,7	.,.	2,6
Unigene0005149	723	723	A	T	SNP	.	18388.9	1|1	0|1	0|1	0|1	1|1	1|1	0|1	1|1	0|1	1|1	1|1	0|1	0|1	0|1	0|1	0|1	0|1	0|0	0|1	0,39	10,42	6,12	7,50	0,13	0,25	9,21	0,16	16,17	0,9	0,29	2,16	6,26	9,47	4,29	6,11	9,23	6,0	7,26
Unigene0005165	317	317	A	G	SNP	.	80902.3	1|1	0|1	1|1	0|1	0|1	1|1	1|1	1|1	1|1	1|1	1|1	0|1	0|1	0|1	0|1	1|1	1|1	1|1	1|1	0,132	90178	0,41	24220	7,25	0,97	0,127	0,92	0,73	0,225	0,95	8,33	10,68	19178	44209	0,97	0,97	0,49	0,195
Unigene0005178	316	316	A	T	SNP	.	5093.42	1|1	1|1	1|1	1|1	1|1	1|1	1|1	1|1	0|1	1|1	1|1	1|1	1|1	1|1	0|1	0|1	0|1	0|1	0|1	0,2	0,8	0,7	0,4	0,3	0,1	0,14	0,13	6,13	0,8	0,10	0,2	0,3	0,12	7,8	2,5	8,9	2,5	6,15
Unigene0005184	1097	1097	T	A	SNP	.	10139.7	1|1	0|1	1|1	1|1	0|1	1|1	1|1	1|1	0|1	1|1	1|1	1|1	1|1	0|1	0|1	1|1	0|1	0|1	0|1	0,20	12,16	0,17	0,37	1,10	0,21	0,9	0,4	44,25	0,4	0,5	0,6	0,7	16,27	7,18	0,8	37,28	1,3	61,22
Unigene0005184	1936	1936	T	C	SNP	.	4723.16	1|1	1|1	0|1	1|1	0|0	0|1	0|0	1|1	0|0	0|0	1|1	0|0	0|0	0|0	1|1	1|1	0|1	0|0	0|1	0,29	0,11	21,13	0,16	7,0	6,9	4,0	0,1	30,0	2,0	0,4	7,0	22,0	20,0	0,2	0,2	30,24	1,0	41,26
Unigene0005190	308	308	G	T	SNP	.	2861.76	1|1	0|1	0|1	0|0	0|1	1|1	0|0	1|1	0|1	0|0	1|1	0|1	0|1	0|1	0|1	0|0	0|1	1|1	1|1	0,21	5,11	4,1	30,1	5,5	0,3	6,0	0,3	9,2	13,1	0,3	4,3	1,8	10,4	4,4	12,0	1,8	0,2	0,6
Unigene0005190	497	497	C	T	SNP	.	3723.66	.|.	0|1	1|1	1|1	0|1	0|1	1|1	1|1	0|1	1|1	1|1	1|1	1|1	0|1	1|1	1|1	0|1	0|0	0|1	.,.	1,3	0,10	0,12	2,2	2,1	0,6	0,1	1,5	0,12	0,2	0,7	0,2	3,10	0,9	0,3	1,8	1,0	1,4
Unigene0005193	320	320	C	G	SNP	.	495.43	0|0	1|1	0|0	0|1	1|1	0|0	1|1	0|1	1|1	0|0	0|0	1|1	0|0	.|.	1|1	.|.	.|.	0|0	1|1	3,0	0,2	2,0	3,1	0,1	7,0	0,3	6,1	0,1	16,1	1,0	0,1	3,0	.,.	0,1	.,.	.,.	4,0	0,3
Unigene0005193	383	383	A	G	SNP	.	7649.52	0|1	0|1	0|1	0|1	0|1	0|1	1|1	0|1	0|1	0|1	0|1	1|1	0|1	1|1	0|1	1|1	1|1	0|1	1|1	14,4	0,24	7,6	6,14	0,11	11,6	0,21	3,6	2,8	39,21	7,4	0,6	16,3	1,20	5,16	0,14	0,6	15,5	1,20
Unigene0005193	410	410	A	G	SNP	.	10895.6	0|0	1|1	0|1	0|1	1|1	0|1	1|1	0|1	0|1	0|1	0|1	1|1	0|1	0|1	0|1	1|1	1|1	0|1	0|1	26,1	0,52	10,13	9,15	0,19	10,8	0,29	1,5	5,11	51,22	7,6	0,8	17,7	6,31	6,27	0,17	0,11	19,5	6,17
Unigene0005193	614	614	T	G	SNP	.	460.55	0|0	0|0	1|1	0|1	0|0	1|1	0|0	1|1	1|1	0|0	0|0	0|0	0|0	1|1	0|1	0|1	1|1	0|1	0|0	3,0	4,0	0,1	2,1	1,0	0,1	1,0	0,4	0,1	2,0	3,0	1,0	1,0	0,2	5,1	1,1	0,2	2,1	1,0
Unigene0005209	454	454	A	C	SNP	.	6102.02	.|.	0|0	0|1	0|1	0|1	1|1	0|0	.|.	1|1	1|1	0|1	0|1	1|1	1|1	1|1	.|.	1|1	1|1	.|.	.,.	35,2	40,17	8,2	22,15	0,9	36,1	.,.	0,14	0,29	7,10	9,5	0,8	0,33	0,3	.,.	0,1	0,29	.,.
Unigene0005212	469	469	A	G	SNP	.	4891.87	0|1	0|1	0|0	0|1	1|1	0|1	0|1	1|1	1|1	0|1	1|1	1|1	0|1	0|1	0|1	1|1	1|1	0|1	1|1	1,11	7,17	4,0	2,3	0,6	12,2	2,7	0,16	0,6	12,16	0,2	0,3	29,6	2,18	2,14	0,4	0,1	19,4	0,2
Unigene0005212	1890	1890	A	G	SNP	.	18507.4	1|1	1|1	0|1	1|1	1|1	0|1	0|1	1|1	1|1	0|1	1|1	1|1	0|1	1|1	0|1	0|1	1|1	0|1	1|1	0,14	0,68	4,1	0,30	1,12	9,11	8,69	0,33	4,57	7,58	0,25	0,7	22,48	0,39	2,1	7,11	0,10	20,46	0,15
Unigene0005212	1920	1920	C	T	SNP	.	14349.1	1|1	0|1	0|1	1|1	0|1	0|0	0|1	1|1	0|1	0|1	0|1	1|1	0|1	1|1	0|1	0|1	1|1	0|1	1|1	0,15	39,32	4,1	0,25	2,14	24,0	13,67	0,24	40,23	19,48	13,17	0,6	21,41	0,43	5,2	15,11	0,13	35,26	0,16
Unigene0005219	3953	3953	A	G	SNP	.	1873.77	0|1	0|1	1|1	1|1	1|1	0|1	1|1	1|1	1|1	.|.	0|1	1|1	1|1	1|1	0|1	0|1	0|1	.|.	0|1	3,2	1,1	0,2	0,7	0,1	2,2	0,2	0,1	0,6	.,.	1,3	0,4	0,1	0,7	1,6	1,1	1,4	.,.	1,2
Unigene0005219	4009	4009	A	-	Deletion	.	1284.46	0|1	1|1	1|1	0|1	1|1	1|1	1|1	1|1	0|1	.|.	1|1	1|1	1|1	0|1	0|1	1|1	.|.	.|.	0|1	4,1	0,3	0,4	1,3	0,1	0,2	0,2	0,3	1,3	.,.	0,2	0,2	0,1	1,6	5,5	0,1	.,.	.,.	1,2
Unigene0005222	130	130	A	G	SNP	.	1425.17	0|0	0|1	1|1	1|1	1|1	0|1	0|1	0|0	1|1	0|1	1|1	1|1	.|.	1|1	.|.	0|1	1|1	0|0	1|1	1,0	9,6	0,1	0,1	0,1	2,1	3,3	4,0	0,3	3,4	0,3	0,4	.,.	0,5	.,.	1,2	0,1	2,0	0,3
Unigene0005225	104	104	G	C	SNP	.	21492.1	1|1	0|1	0|1	0|1	1|1	1|1	0|1	1|1	0|1	1|1	1|1	1|1	0|1	0|1	0|1	0|1	0|1	0|1	0|1	0,71	80,77	34,11	33,15	0,33	0,18	81,63	0,144	85,18	0,29	0,36	0,24	16,10	37,23	28,16	63,6	34,15	48,6	42,22
Unigene0005225	199	199	T	C	SNP	.	19852.6	1|1	0|1	0|1	0|1	1|1	1|1	0|1	1|1	0|1	1|1	1|1	1|1	0|1	0|1	0|1	0|0	0|1	0|0	0|1	0,65	73,70	29,8	21,12	0,29	0,14	74,47	0,134	99,28	0,31	0,39	0,14	24,6	33,18	17,7	59,3	45,11	41,4	32,17
Unigene0005225	985	985	G	T	SNP	.	6671.64	0|1	1|1	1|1	0|1	0|1	1|1	0|1	0|1	0|1	1|1	0|1	0|1	0|1	1|1	0|1	1|1	0|1	1|1	0|1	4,9	1,19	0,7	1,5	1,3	0,2	3,14	23,15	3,13	0,6	1,5	2,3	5,3	1,17	2,7	0,5	1,9	0,9	6,12
Unigene0005225	986	986	A	G	SNP	.	6671.64	0|1	1|1	1|1	0|1	0|1	1|1	0|1	0|1	0|1	1|1	0|1	0|1	0|1	1|1	0|1	1|1	0|1	1|1	0|1	4,9	1,19	0,7	1,5	1,3	0,2	3,14	22,14	3,13	0,5	1,5	2,3	5,3	1,17	2,7	0,5	1,8	0,9	6,12
Unigene0005225	1102	1102	G	T	SNP	.	1876.74	0|0	1|1	.|.	.|.	1|1	1|1	0|1	0|1	0|1	1|1	1|1	1|1	0|1	0|1	1|1	.|.	1|1	1|1	1|1	5,0	0,8	.,.	.,.	0,4	0,3	1,3	10,3	2,5	0,7	0,2	0,4	1,1	1,4	0,5	.,.	0,2	0,1	0,3
Unigene0005225	1149	1149	C	T	SNP	.	3899.94	0|0	1|1	1|1	1|1	0|1	1|1	0|1	0|0	1|1	1|1	0|0	1|1	1|1	0|1	1|1	0|1	1|1	1|1	1|1	5,0	0,18	0,5	0,6	1,3	0,4	3,9	20,1	0,9	0,11	3,0	0,3	0,2	1,7	0,4	1,2	0,2	0,1	0,3
Unigene0005225	1248	1248	A	G	SNP	.	3200.02	0|1	0|0	0|1	0|1	0|1	0|1	1|1	0|1	0|1	0|1	0|1	0|1	1|1	0|1	0|1	1|1	1|1	1|1	1|1	7,9	36,0	4,5	7,2	4,7	9,2	0,15	23,8	1,6	27,7	4,11	4,3	0,4	4,5	3,3	0,1	0,1	0,6	0,3
Unigene0005234	201	201	A	G	SNP	.	591.91	0|0	.|.	1|1	.|.	.|.	1|1	.|.	0|1	1|1	.|.	.|.	.|.	1|1	1|1	1|1	.|.	.|.	.|.	1|1	29,0	.,.	0,1	.,.	.,.	0,1	.,.	4,4	0,1	.,.	.,.	.,.	0,1	0,2	0,2	.,.	.,.	.,.	0,1
Unigene0005234	216	216	A	G	SNP	.	633.32	0|0	.|.	1|1	.|.	.|.	1|1	.|.	0|1	1|1	.|.	.|.	.|.	1|1	1|1	1|1	.|.	.|.	1|1	1|1	30,0	.,.	0,1	.,.	.,.	0,1	.,.	5,3	0,2	.,.	.,.	.,.	0,1	0,3	0,3	.,.	.,.	0,1	0,1
Unigene0005234	342	342	T	C	SNP	.	1351.05	0|0	1|1	1|1	1|1	1|1	.|.	1|1	0|1	.|.	.|.	1|1	.|.	1|1	1|1	1|1	1|1	1|1	0|0	.|.	18,0	0,1	0,2	0,3	0,1	.,.	0,3	6,1	.,.	.,.	0,4	.,.	0,5	0,9	0,6	0,1	0,1	1,0	.,.
Unigene0005234	446	446	T	C	SNP	.	615.82	0|0	1|1	1|1	1|1	.|.	.|.	1|1	0|0	.|.	.|.	1|1	.|.	.|.	1|1	.|.	1|1	0|0	.|.	0|0	21,0	0,3	0,3	0,2	.,.	.,.	0,1	6,0	.,.	.,.	0,1	.,.	.,.	0,6	.,.	0,1	1,0	.,.	2,0
Unigene0005234	472	472	A	G	SNP	.	838.59	0|0	1|1	1|1	1|1	.|.	.|.	1|1	0|0	0|0	.|.	1|1	.|.	1|1	1|1	0|0	.|.	0|0	.|.	0|0	20,0	0,3	0,3	0,3	.,.	.,.	0,3	7,0	1,0	.,.	0,2	.,.	0,1	0,9	1,0	.,.	1,0	.,.	1,0
Unigene0005236	228	228	T	C	SNP	.	1020.71	1|1	0|1	1|1	0|0	.|.	.|.	0|0	1|1	1|1	0|1	0|1	1|1	1|1	0|1	0|0	.|.	0|0	.|.	0|1	0,1	9,7	0,2	1,0	.,.	.,.	13,0	0,5	0,2	5,5	2,3	0,1	0,2	1,1	8,0	.,.	3,0	.,.	3,1
Unigene0005237	124	124	C	G	SNP	.	5480.31	1|1	0|1	0|1	0|1	1|1	0|1	1|1	.|.	0|1	1|1	1|1	0|1	1|1	0|1	0|1	1|1	0|1	1|1	0|1	0,15	5,15	3,7	5,8	0,5	3,3	0,1	.,.	7,12	0,2	0,5	1,5	1,12	25,32	1,2	0,1	2,18	0,1	6,20
Unigene0005239	963	963	A	G	SNP	.	4516.95	1|1	0|1	0|1	0|1	0|1	1|1	1|1	1|1	1|1	1|1	1|1	0|1	0|1	0|1	1|1	1|1	0|1	0|1	1|1	0,10	4,10	1,2	3,7	1,2	0,8	0,11	0,7	0,5	0,6	0,8	1,5	3,5	4,8	0,11	0,4	4,10	2,2	0,1
Unigene0005240	1266	1266	C	T	SNP	.	4348.03	.|.	1|1	1|1	1|1	0|1	1|1	1|1	.|.	1|1	0|1	1|1	0|1	0|1	0|1	1|1	1|1	0|1	0|1	0|1	.,.	0,5	0,13	0,9	6,2	0,2	0,21	.,.	1,19	21,3	0,3	3,3	3,3	6,8	0,7	0,13	12,9	3,1	9,11
Unigene0005241	703	703	A	G	SNP	.	702.43	0|0	1|1	0|1	0|1	0|1	1|1	0|1	0|0	0|0	.|.	1|1	1|1	0|1	1|1	0|0	.|.	0|0	1|1	0|1	2,0	0,4	1,2	2,1	1,1	0,3	2,1	2,0	4,0	.,.	0,1	0,2	3,1	0,5	1,0	.,.	5,0	0,1	4,1
Unigene0005249	302	302	A	G	SNP	.	3017.43	1|1	1|1	0|1	0|1	1|1	0|1	1|1	.|.	1|1	1|1	1|1	1|1	0|1	0|1	0|1	1|1	1|1	.|.	0|1	0,5	0,2	2,3	2,7	0,5	3,3	0,5	.,.	0,3	0,1	0,6	0,6	1,2	1,10	7,6	0,6	0,10	.,.	3,5
Unigene0005261	2251	2251	G	A	SNP	.	509.89	.|.	0|1	1|1	.|.	1|1	0|0	1|1	.|.	0|0	.|.	1|1	1|1	.|.	0|1	0|0	0|1	.|.	0|0	1|1	.,.	5,3	0,1	.,.	0,3	4,0	0,1	.,.	2,0	.,.	0,1	0,2	.,.	9,4	4,0	4,2	.,.	1,0	0,1
Unigene0005288	750	750	C	G	SNP	.	1799.68	1|1	1|1	0|1	0|1	0|1	1|1	.|.	0|1	1|1	1|1	.|.	1|1	.|.	.|.	0|1	1|1	1|1	1|1	0|1	0,1	0,8	1,1	2,2	1,1	0,3	.,.	4,3	0,3	0,3	.,.	0,1	.,.	.,.	1,5	0,8	0,4	0,1	3,4
Unigene0005295	376	376	A	T	SNP	.	1523.1	0|1	1|1	0|0	1|1	.|.	0|1	0|1	1|1	0|0	.|.	1|1	1|1	0|0	1|1	0|1	0|1	0|1	.|.	0|1	4,2	0,6	1,0	0,3	.,.	3,5	1,1	0,1	2,0	.,.	0,6	0,1	1,0	0,10	5,3	1,1	5,1	.,.	7,1
Unigene0005296	1787	1787	C	T	SNP	.	2357.16	1|1	0|1	1|1	1|1	1|1	1|1	1|1	0|0	0|1	0|0	0|1	1|1	0|1	1|1	0|1	0|1	0|1	0|1	0|1	0,3	36,7	0,1	0,4	0,6	.	0,8	30,1	26,4	12,1	9,4	0,2	5,8	0,6	3,2	4,2	12,5	6,1	33,5
Unigene0005296	1788	1788	C	G	SNP	.	2357.16	1|1	0|1	1|1	1|1	1|1	1|1	1|1	0|0	0|1	0|0	0|1	1|1	0|1	1|1	0|1	0|1	0|1	0|1	0|1	0,3	35,5	0,1	0,3	0,5	0,1	0,8	28,0	25,3	12,0	9,1	0,2	5,5	0,5	2,2	4,2	12,4	6,1	32,4
Unigene0005296	2118	2118	C	T	SNP	.	34177.1	1|1	1|1	1|1	0|1	0|1	0|1	0|1	1|1	0|1	0|1	0|1	0|1	1|1	0|1	0|1	1|1	0|1	1|1	0|1	0,40	0,113	0,20	7,39	9,55	6,17	24,60	0,89	24,56	13,55	31,59	3,18	0,63	22,43	11,47	0,47	13,50	0,37	17,73
Unigene0005303	417	417	T	C	SNP	.	816.29	.|.	0|1	1|1	1|1	0|0	.|.	1|1	1|1	1|1	1|1	0|1	1|1	.|.	0|1	0|0	1|1	.|.	.|.	1|1	.,.	3,2	0,1	0,1	1,0	.,.	0,5	0,1	0,1	0,4	1,1	0,1	.,.	2,1	2,0	0,5	.,.	.,.	0,1
Unigene0005314	404	404	T	C	SNP	.	5133.89	1|1	0|1	0|1	0|1	1|1	0|1	1|1	0|1	0|1	0|0	0|1	1|1	1|1	1|1	1|1	1|1	0|1	0|1	0|1	0,10	2,2	6,8	6,7	0,13	3,8	0,9	5,6	5,5	7,0	2,2	0,5	0,9	0,15	0,9	0,3	7,13	4,2	8,18
Unigene0005320	356	356	C	T	SNP	.	4793.51	0|1	1|1	1|1	1|1	1|1	0|1	1|1	1|1	1|1	1|1	1|1	1|1	0|1	0|1	0|1	.|.	0|1	0|1	0|1	4,9	0,19	0,6	0,9	0,6	3,5	0,12	0,9	0,9	0,4	0,9	0,2	4,2	3,10	1,1	.,.	2,8	2,6	3,5
Unigene0005320	3327	3327	A	-	Deletion	.	1037.66	0|0	0|1	1|1	0|1	1|1	0|1	1|1	1|1	1|1	.|.	1|1	.|.	0|0	0|1	0|1	1|1	0|1	0|0	0|1	8,0	4,2	0,3	1,8	0,1	3,1	0,1	0,1	0,3	.,.	0,1	.,.	1,0	2,6	6,3	0,1	2,2	3,0	1,2
Unigene0005325	3409	3409	C	T	SNP	.	1493.46	.|.	1|1	0|0	0|0	0|0	0|0	0|1	1|1	1|1	.|.	0|1	0|1	.|.	0|1	1|1	0|1	1|1	1|1	1|1	.,.	0,7	11,0	8,0	10,0	4,0	7,1	0,2	0,8	.,.	18,4	5,2	.,.	15,2	0,1	2,1	0,7	0,1	0,5
Unigene0005325	3421	3421	A	G	SNP	.	734.69	.|.	1|1	0|0	0|0	0|0	0|0	0|1	1|1	1|1	.|.	0|1	0|1	.|.	0|0	1|1	0|0	1|1	1|1	1|1	.,.	0,4	10,0	10,0	8,0	4,0	6,1	0,1	0,4	.,.	19,3	7,1	.,.	14,0	0,1	4,0	0,6	0,1	0,3
Unigene0005332	387	387	G	T	SNP	.	1414.25	1|1	1|1	1|1	0|1	1|1	0|1	1|1	1|1	0|0	1|1	1|1	1|1	1|1	1|1	1|1	1|1	0|0	0|0	1|1	0,4	0,2	0,1	3,3	0,3	1,4	0,6	0,2	2,0	0,2	0,1	0,2	0,1	1,4	0,1	0,1	5,0	1,0	0,1
Unigene0005345	913	913	A	G	SNP	.	7010.24	1|1	1|1	0|1	1|1	0|1	1|1	0|1	0|1	0|1	1|1	1|1	1|1	1|1	0|1	0|1	1|1	1|1	0|1	1|1	0,15	1,20	2,11	0,13	1,4	0,8	1,13	1,12	3,17	1,16	0,3	0,9	0,6	5,11	4,10	0,3	0,18	3,3	0,12
Unigene0005345	1020	1020	A	G	SNP	.	5704.42	1|1	1|1	0|1	0|1	0|1	1|1	0|1	1|1	1|1	1|1	0|1	0|1	0|1	0|1	1|1	0|1	1|1	1|1	1|1	0,7	0,10	1,7	1,12	3,9	0,11	2,10	0,8	0,11	0,11	2,4	3,5	1,2	2,10	0,13	3,1	0,15	0,4	0,6
Unigene0005345	1100	1100	C	T	SNP	.	3003.86	1|1	1|1	1|1	1|1	1|1	1|1	0|1	.|.	1|1	1|1	0|1	0|1	0|1	0|1	1|1	0|1	1|1	1|1	1|1	0,3	0,3	0,3	0,6	0,2	0,8	1,5	.,.	0,9	0,3	1,6	1,1	1,1	2,3	0,9	1,1	0,6	0,2	0,5
Unigene0005348	184	184	A	G	SNP	.	1345.32	1|1	1|1	.|.	0|1	1|1	1|1	0|1	1|1	0|0	1|1	.|.	1|1	0|1	0|1	0|1	1|1	0|1	1|1	1|1	0,11	0,1	.,.	1,1	0,2	0,1	2,3	0,3	2,0	0,1	.,.	0,2	1,1	1,1	2,2	0,2	2,3	0,1	0,1
Unigene0005349	1180	1180	A	G	SNP	.	9619.65	1|1	0|1	0|1	0|1	1|1	1|1	0|1	1|1	0|1	1|1	0|1	1|1	1|1	0|1	0|1	0|1	0|1	1|1	0|1	0,9	26,28	13,12	35,13	0,11	0,23	11,14	0,11	5,14	0,17	10,11	0,7	0,10	18,18	6,21	3,7	9,13	0,8	3,13
Unigene0005349	1214	1214	A	G	SNP	.	6609.56	1|1	0|1	0|1	0|1	1|1	1|1	0|1	1|1	0|1	1|1	1|1	1|1	1|1	0|1	0|1	0|1	0|1	1|1	0|1	0,10	12,18	13,9	14,16	0,8	0,9	9,8	0,3	6,9	0,9	0,10	0,4	0,7	15,9	7,9	1,7	9,11	0,6	4,6
Unigene0005355	396	396	A	G	SNP	.	23064.2	0|1	1|1	1|1	1|1	0|1	1|1	0|1	1|1	0|1	0|1	1|1	0|1	1|1	0|1	0|1	1|1	1|1	1|1	0|1	30,11	0,32	0,28	3,44	2,11	0,17	4,48	0,16	4,43	15,47	0,18	6,10	0,82	5,54	3,36	0,25	2,33	0,41	5,29
Unigene0005359	1539	1539	A	C	SNP	.	4854.02	0|0	1|1	0|1	0|1	0|1	0|1	0|1	0|1	1|1	0|1	1|1	0|1	0|1	1|1	1|1	1|1	1|1	0|1	1|1	4,0	0,6	5,7	5,13	2,6	4,8	1,6	1,11	0,6	1,3	0,1	2,1	2,8	0,10	0,1	0,6	0,6	2,5	0,11
Unigene0005359	1541	1541	A	C	SNP	.	4854.02	0|0	1|1	0|1	0|1	0|1	0|1	0|1	0|1	1|1	0|1	1|1	0|1	0|1	1|1	1|1	1|1	1|1	0|1	1|1	4,1	0,6	5,7	5,14	2,7	4,8	1,6	1,9	0,6	1,3	0,1	2,1	2,8	0,11	0,1	0,6	0,6	3,5	0,10
Unigene0005370	374	374	T	G	SNP	.	7239.83	0|1	1|1	0|1	1|1	0|1	1|1	0|1	0|1	0|1	1|1	1|1	1|1	0|1	1|1	0|1	0|1	0|1	1|1	0|1	3,5	0,14	1,4	1,12	2,8	0,5	6,14	11,7	2,13	0,24	0,6	0,10	2,5	1,12	1,2	3,7	4,5	0,6	7,18
Unigene0005370	1060	1060	C	T	SNP	.	3749.91	.|.	0|1	1|1	0|1	1|1	0|1	.|.	1|1	0|1	0|1	1|1	0|1	1|1	0|1	0|1	0|0	1|1	1|1	1|1	.,.	6,8	0,4	3,6	0,8	1,3	.,.	0,3	7,3	1,6	0,11	1,6	0,3	2,6	2,3	3,0	0,3	0,5	0,7
Unigene0005370	1061	1061	C	G	SNP	.	3749.91	.|.	0|1	1|1	0|1	1|1	0|1	.|.	1|1	0|1	0|1	1|1	0|1	1|1	0|1	0|1	0|0	1|1	1|1	1|1	.,.	5,8	0,4	3,6	0,9	1,3	.,.	0,2	7,4	1,6	0,12	1,6	0,4	2,7	2,2	3,0	0,3	0,5	0,7
Unigene0005371	2607	2607	A	G	SNP	.	508.19	0|1	0|0	0|0	1|1	0|0	0|1	0|1	1|1	1|1	0|0	.|.	1|1	0|0	0|1	0|0	0|0	0|0	1|1	1|1	1,1	3,0	2,0	0,2	3,0	2,2	1,2	0,1	0,2	2,0	.,.	0,2	2,0	2,1	1,0	1,0	1,0	0,1	0,1
Unigene0005390	1417	1417	C	T	SNP	.	559.68	1|1	0|1	1|1	.|.	.|.	1|1	.|.	0|0	0|1	0|1	1|1	0|0	1|1	0|1	.|.	0|0	1|1	1|1	.|.	0,2	1,1	0,1	.,.	.,.	0,1	.,.	2,0	1,2	1,1	0,1	1,0	0,1	2,2	.,.	1,0	0,2	0,1	.,.
Unigene0005402	285	285	C	G	SNP	.	3549.17	1|1	0|1	0|0	1|1	0|1	1|1	0|1	1|1	1|1	1|1	1|1	0|1	1|1	0|1	0|1	0|1	0|0	.|.	0|1	0,3	10,9	4,0	0,22	10,4	0,3	8,10	0,1	0,18	0,2	0,3	5,4	0,9	11,7	16,10	23,5	9,0	.,.	7,1
Unigene0005402	314	314	A	T	SNP	.	3116.11	1|1	0|1	0|1	0|1	0|1	1|1	0|1	1|1	0|1	1|1	1|1	0|1	0|1	0|1	0|1	0|0	0|1	1|1	0|1	0,10	12,12	2,3	24,7	9,6	0,7	18,2	0,2	20,2	0,8	0,6	5,6	6,3	16,8	29,4	26,1	10,2	0,5	7,4
Unigene0005412	114	114	A	G	SNP	.	1031.86	.|.	.|.	1|1	1|1	1|1	1|1	.|.	0|0	1|1	1|1	0|1	.|.	1|1	1|1	1|1	1|1	.|.	0|0	.|.	.,.	.,.	0,2	0,6	0,2	0,2	.,.	1,0	0,3	0,1	1,2	.,.	0,1	0,1	0,4	0,6	.,.	1,0	.,.
Unigene0005412	153	153	A	G	SNP	.	792.43	.|.	.|.	1|1	1|1	1|1	1|1	.|.	0|0	1|1	1|1	0|1	.|.	1|1	1|1	1|1	1|1	.|.	0|0	.|.	.,.	.,.	0,2	0,4	0,1	0,1	.,.	1,0	0,2	0,1	1,2	.,.	0,1	0,1	0,4	0,4	.,.	1,0	.,.
Unigene0005418	286	286	A	G	SNP	.	983.4	0|0	0|0	1|1	.|.	0|1	1|1	.|.	0|1	.|.	.|.	0|1	1|1	1|1	1|1	.|.	1|1	0|1	0|0	1|1	9,0	8,0	0,2	.,.	2,1	0,3	.,.	5,8	.,.	.,.	1,1	0,1	0,1	0,2	.,.	0,1	1,4	1,0	0,5
Unigene0005421	1241	1241	C	T	SNP	.	4365.2	.|.	0|1	0|1	1|1	0|1	0|1	1|1	1|1	1|1	1|1	0|1	0|1	1|1	0|1	1|1	1|1	1|1	1|1	1|1	.,.	11,13	5,7	0,13	3,2	5,6	0,8	0,1	0,12	0,12	1,7	3,2	0,6	13,3	0,6	0,4	0,4	0,3	0,4
Unigene0005421	1429	1429	A	G	SNP	.	887.12	.|.	1|1	0|1	0|0	1|1	1|1	0|1	0|0	.|.	.|.	.|.	1|1	.|.	0|1	.|.	.|.	1|1	0|0	1|1	.,.	0,6	1,4	2,0	0,2	0,5	2,0	3,0	.,.	.,.	.,.	0,1	.,.	1,2	.,.	.,.	0,1	1,0	0,2
Unigene0005421	1510	1510	C	T	SNP	.	1345.41	1|1	1|1	0|1	0|0	0|0	1|1	0|0	0|0	1|1	1|1	1|1	0|0	0|1	0|0	.|.	0|0	1|1	0|0	1|1	0,1	0,4	4,2	15,1	3,0	0,2	5,1	11,0	0,9	0,1	0,1	3,0	3,1	3,0	.,.	2,0	0,6	2,0	0,5
Unigene0005421	1528	1528	G	T	SNP	.	1427.45	1|1	1|1	0|1	0|0	0|0	1|1	0|0	0|0	1|1	1|1	1|1	0|0	0|1	0|0	.|.	0|0	1|1	0|0	1|1	0,1	0,8	4,2	19,0	3,0	0,2	5,0	11,0	0,10	0,1	0,1	3,0	3,2	4,0	.,.	2,0	0,6	3,0	0,4
Unigene0005421	1598	1598	A	G	SNP	.	2565.66	.|.	0|0	0|1	1|1	1|1	0|1	1|1	1|1	0|0	0|0	0|0	1|1	0|1	1|1	1|1	.|.	0|1	0|1	0|1	.,.	11,0	3,2	0,18	0,5	7,2	0,6	0,8	13,0	2,0	5,0	0,4	9,2	0,9	.	.,.	12,7	2,1	8,4
Unigene0005421	1628	1628	G	T	SNP	.	2851.33	.|.	0|1	1|1	0|1	0|1	0|1	0|1	0|0	1|1	1|1	1|1	0|1	0|1	0|1	1|1	1|1	0|1	0|1	0|1	.,.	1,12	0,2	15,3	3,3	2,5	7,1	6,0	0,16	0,2	0,5	5,2	1,10	10,1	0,3	0,1	8,9	1,2	5,10
Unigene0005424	77	77	G	A	SNP	.	500.16	.|.	1|1	1|1	1|1	.|.	.|.	0|1	1|1	.|.	.|.	.|.	1|1	0|1	0|1	.|.	.|.	.|.	0|0	1|1	.,.	0,1	0,1	0,3	.,.	.,.	1,3	0,1	.,.	.,.	.,.	0,3	5,1	8,1	.,.	.,.	.,.	1,0	0,1
Unigene0005424	1397	1397	A	G	SNP	.	1286.28	0|0	1|1	.|.	0|1	0|1	0|0	0|1	1|1	1|1	1|1	.|.	0|1	1|1	0|1	1|1	1|1	.|.	0|0	1|1	1,0	0,3	.,.	1,4	2,1	1,0	1,5	0,1	0,1	0,2	.,.	3,2	0,5	1,2	0,1	0,2	.,.	.	0,4
Unigene0005424	1414	1414	G	T	SNP	.	617.18	0|0	1|1	.|.	0|1	0|0	0|0	0|1	0|0	1|1	1|1	.|.	0|0	1|1	0|1	1|1	0|1	.|.	0|0	1|1	1,0	0,2	.,.	1,2	3,0	1,0	1,1	0,0	0,1	0,2	.,.	4,0	0,3	3,1	0,1	1,1	.,.	1,0	0,2
Unigene0005424	1496	1496	A	T	SNP	.	1297.44	1|1	1|1	.|.	0|1	0|1	.|.	0|1	1|1	1|1	1|1	.|.	0|1	1|1	0|1	.|.	0|1	.|.	0|0	.|.	0,1	0,2	.,.	1,3	4,6	.,.	2,3	0,2	0,3	.	.,.	3,4	0,1	3,4	.,.	1,2	.,.	1,0	.,.
Unigene0005424	1498	1498	G	T	SNP	.	1297.44	1|1	1|1	.|.	0|1	0|1	.|.	0|1	1|1	1|1	1|1	.|.	0|1	1|1	0|1	.|.	0|1	.|.	0|0	.|.	0,1	0,2	.,.	1,3	4,6	.,.	2,3	0,2	0,3	0,1	.,.	2,4	0,1	3,4	.,.	1,3	.,.	1,0	.,.
Unigene0005424	1680	1680	C	G	SNP	.	693.07	.|.	0|0	.|.	1|1	0|0	.|.	1|1	1|1	0|0	0|0	0|0	0|1	1|1	1|1	.|.	.|.	.|.	0|1	1|1	.,.	1,0	.,.	0,1	1,0	.,.	0,3	0,4	2,0	1,0	1,0	2,3	0,2	0,5	.,.	.,.	.,.	1,1	0,2
Unigene0005424	1703	1703	C	T	SNP	.	1164.65	.|.	0|1	.|.	1|1	0|0	.|.	1|1	1|1	0|1	0|1	0|0	0|1	1|1	1|1	.|.	.|.	.|.	0|1	1|1	.,.	1,1	.,.	0,2	2,0	.,.	0,3	0,5	2,1	1,1	1,0	2,7	0,3	0,7	.,.	.,.	.,.	1,2	0,2
Unigene0005424	1817	1817	C	T	SNP	.	2045.24	.|.	1|1	0|0	0|1	0|1	.|.	1|1	0|1	1|1	.|.	0|0	0|1	1|1	1|1	0|0	1|1	0|1	1|1	1|1	.,.	0,8	1,0	3,4	1,3	.,.	0,9	3,2	0,2	.,.	3,0	1,9	0,4	0,10	1,0	0,2	1,1	0,1	0,2
Unigene0005442	1507	1507	A	G	SNP	.	7758.08	1|1	1|1	0|1	0|1	0|1	0|1	1|1	1|1	0|1	1|1	1|1	0|1	1|1	0|1	1|1	1|1	0|1	0|1	0|1	0,8	0,5	3,4	12,14	5,11	12,16	0,4	0,44	9,14	0,1	1,19	7,7	0,26	16,5	0,2	0,2	4,6	1,1	35,20
Unigene0005442	1833	1833	C	G	SNP	.	5036.83	1|1	1|1	0|1	0|1	0|1	0|1	.|.	1|1	0|1	0|1	1|1	0|1	0|1	0|1	1|1	1|1	0|1	1|1	0|1	0,2	0,11	8,12	7,19	8,2	6,5	.,.	0,1	1,11	1,1	0,4	3,2	6,30	14,22	0,1	0,3	2,4	0,2	20,10
Unigene0005442	2138	2138	A	G	SNP	.	9274.31	1|1	0|1	0|1	0|1	0|1	0|1	1|1	1|1	1|1	1|1	1|1	0|1	1|1	1|1	1|1	1|1	0|1	1|1	0|1	0,2	3,17	2,15	5,21	2,12	5,27	0,2	0,29	1,28	0,1	0,6	4,8	0,15	0,14	0,7	0,3	1,5	0,4	12,32
Unigene0005442	2540	2540	G	A	SNP	.	1547.08	0|1	1|1	0|0	1|1	.|.	0|1	1|1	0|1	0|1	.|.	.|.	.|.	0|0	1|1	1|1	.|.	1|1	0|1	1|1	2,2	0,1	8,0	0,7	.,.	8,8	0,1	20,2	4,4	.,.	.,.	.,.	4,0	0,1	0,1	.,.	0,2	1,1	0,14
Unigene0005444	337	337	A	G	SNP	.	1432.92	0|0	1|1	0|1	0|0	1|1	.|.	1|1	.|.	.|.	0|0	0|1	0|1	1|1	0|1	1|1	0|1	1|1	0|1	0|0	3,0	0,3	3,2	3,0	0,2	.,.	0,5	.,.	.,.	2,0	2,1	1,1	0,6	3,10	0,9	1,1	0,1	1,4	3,0
Unigene0005455	464	464	A	T	SNP	.	2565.39	1|1	1|1	1|1	1|1	1|1	.|.	1|1	0|1	0|1	.|.	0|1	1|1	0|1	0|1	0|1	.|.	0|1	1|1	1|1	0,5	0,4	0,5	0,8	0,4	.,.	0,6	3,2	7,1	.,.	1,2	0,2	3,4	8,8	2,3	.,.	3,11	0,1	0,5
Unigene0005470	567	567	T	G	SNP	.	2492.18	1|1	0|1	1|1	0|1	1|1	0|1	1|1	0|0	0|1	1|1	0|1	0|1	1|1	0|1	0|0	1|1	0|1	1|1	0|1	0,5	3,4	0,1	2,5	0,1	3,4	0,1	2,0	2,8	0,1	4,3	1,2	0,6	4,4	1,0	0,3	2,4	0,2	2,10
Unigene0005470	1671	1671	A	T	SNP	.	399.09	0|0	0|1	1|1	.|.	0|0	0|0	1|1	.|.	0|1	.|.	0|0	.|.	0|0	1|1	1|1	1|1	0|0	1|1	0|1	2,0	3,1	0,1	.,.	1,0	3,0	0,1	.,.	3,1	.,.	1,0	.,.	3,0	0,3	0,1	0,1	7,0	0,2	2,1
Unigene0005478	670	670	C	G	SNP	.	2583.85	0|0	1|1	0|1	1|1	1|1	1|1	0|1	0|0	1|1	.|.	1|1	1|1	0|1	0|1	1|1	1|1	1|1	.|.	0|1	2,0	0,8	1,5	0,9	0,2	0,8	1,2	2,0	0,9	.,.	0,2	0,1	1,3	5,12	0,2	0,1	0,2	.,.	2,3
Unigene0005484	373	373	A	T	SNP	.	7603.72	1|1	0|1	1|1	0|1	0|1	1|1	0|1	1|1	0|1	1|1	0|1	1|1	0|1	0|1	0|1	0|1	1|1	0|1	1|1	0,14	4,13	0,11	6,21	3,11	0,9	2,12	0,6	9,7	0,14	4,6	0,6	4,15	6,20	8,4	3,5	0,23	3,9	0,18
Unigene0005487	360	360	A	G	SNP	.	1869.24	1|1	1|1	0|0	0|1	0|0	0|0	1|1	1|1	1|1	0|0	.|.	0|1	0|1	0|1	.|.	1|1	0|1	.|.	0|1	0,4	0,5	2,0	3,7	1,0	1,0	0,2	0,10	0,5	1,0	.,.	2,3	2,1	2,3	.,.	0,2	2,10	.,.	1,3
Unigene0005487	378	378	A	G	SNP	.	1834.73	1|1	1|1	0|0	0|1	0|0	0|0	1|1	1|1	1|1	0|0	.|.	0|1	0|1	0|1	.|.	1|1	0|1	.|.	0|1	0,5	0,2	1,0	3,6	1,0	1,0	0,2	0,14	0,5	1,0	.,.	2,2	2,1	1,3	.,.	0,2	2,8	.,.	1,3
Unigene0005487	714	714	A	G	SNP	.	926.9	1|1	1|1	.|.	0|0	1|1	1|1	0|0	1|1	0|1	.|.	.|.	1|1	.|.	0|1	.|.	0|0	0|1	.|.	0|0	0,3	0,4	.,.	10,0	0,1	0,2	2,0	0,9	2,1	.,.	.,.	0,3	.,.	2,1	.,.	3,0	3,1	.,.	1,0
Unigene0005488	81	81	A	G	SNP	.	5070.11	0|1	0|1	0|1	0|1	0|1	0|1	0|1	0|1	1|1	1|1	1|1	0|1	0|1	0|1	.|.	0|1	1|1	1|1	1|1	6,5	17,13	2,3	3,7	7,5	2,4	6,20	7,5	1,17	0,4	0,7	4,5	3,5	8,10	.,.	2,8	0,13	0,2	0,9
Unigene0005490	383	383	C	G	SNP	.	57530.2	1|1	0|1	0|1	1|1	1|1	0|1	0|1	1|1	0|1	1|1	0|1	1|1	0|1	0|1	0|1	0|1	0|1	1|1	0|1	0,87	14,66	29,33	0,150	0,7	10,67	15155	2106	13,18	11195	30,81	0,36	38,38	72,43	17172	10108	10,94	0,6	15118
Unigene0005496	352	352	G	T	SNP	.	879.62	1|1	1|1	0|1	0|0	.|.	.|.	0|1	0|1	0|1	.|.	1|1	1|1	0|1	0|0	.|.	1|1	1|1	.|.	1|1	0,3	0,3	2,1	2,0	.,.	.,.	1,2	4,1	2,2	.,.	0,3	0,2	1,1	2,0	.,.	0,1	0,6	.,.	0,1
Unigene0005497	132	132	A	G	SNP	.	689.71	.|.	0|0	.|.	.|.	1|1	1|1	.|.	.|.	.|.	1|1	1|1	1|1	0|1	1|1	0|0	.|.	0|0	.|.	0|0	.,.	6,0	.,.	.,.	0,3	0,4	.,.	.,.	.,.	0,1	0,2	0,2	2,1	0,4	5,0	.,.	3,0	.,.	2,0
Unigene0005497	190	190	C	-	Deletion	.	4844.49	1|1	0|1	0|1	1|1	1|1	0|1	1|1	1|1	0|1	0|0	0|1	1|1	0|1	1|1	0|1	1|1	0|1	0|1	0|1	0,9	21,9	6,4	3,11	0,3	8,2	0,11	0,22	4,1	13,0	1,6	0,6	10,5	0,10	16,6	0,4	9,5	2,4	14,7
Unigene0005497	653	653	A	G	SNP	.	14786.1	0|0	0|1	0|1	0|1	0|1	1|1	0|1	0|0	1|1	0|1	1|1	0|1	0|1	0|1	0|1	1|1	1|1	0|1	1|1	63,2	6,26	14,13	64,9	20,10	0,20	52,19	122,0	3,35	33,41	2,38	20,2	11,12	12,14	3,25	1,24	0,34	7,18	0,39
Unigene0005497	1508	1508	C	G	SNP	.	45510.1	1|1	0|1	0|1	1|1	0|1	0|1	0|1	1|1	0|1	0|1	0|1	0|1	0|1	0|1	1|1	1|1	0|1	1|1	0|1	0,9	69,58	8,51	0,101	29,31	18,79	62130	0,30	24,76	29,61	10,33	17,23	16,62	28,96	0,41	2,33	23,71	1,50	80217
Unigene0005498	177	177	G	A	SNP	.	1846.8	1|1	1|1	1|1	0|1	1|1	.|.	0|1	1|1	0|1	1|1	1|1	1|1	1|1	0|0	.|.	1|1	0|1	.|.	0|0	0,4	0,8	0,3	4,3	0,1	.,.	6,8	0,3	5,4	0,3	0,3	0,3	0,5	7,1	.,.	0,1	7,5	.,.	5,0
Unigene0005498	478	478	G	A	SNP	.	1590.72	0|1	1|1	1|1	1|1	1|1	1|1	0|1	0|0	1|1	0|1	.|.	0|1	0|1	0|1	0|0	0|1	0|1	0|1	0|1	4,1	0,6	0,1	0,5	0,2	0,2	12,4	3,0	0,1	1,2	.,.	3,7	4,1	3,6	1,0	1,1	6,3	2,1	2,5
Unigene0005498	565	565	A	G	SNP	.	3186.31	1|1	0|1	1|1	0|1	1|1	0|1	0|1	1|1	1|1	1|1	0|1	1|1	0|0	0|1	1|1	1|1	1|1	1|1	0|1	0,6	1,9	0,1	5,6	0,2	1,3	6,9	0,2	0,5	0,2	2,1	0,6	1,0	7,7	0,1	0,5	0,12	0,3	1,7
Unigene0005500	137	137	C	T	SNP	.	2142.46	1|1	0|1	1|1	1|1	1|1	0|1	1|1	1|1	1|1	1|1	1|1	1|1	0|0	0|1	0|1	0|1	1|1	1|1	.|.	0,5	8,3	0,4	0,3	0,1	1,4	0,1	0,8	0,3	0,2	0,4	0,4	11,0	7,10	2,1	1,4	0,2	0,2	.,.
Unigene0005507	267	267	T	A	SNP	.	9189.71	1|1	1|1	1|1	0|1	1|1	0|1	0|1	0|1	0|1	0|1	0|1	1|1	1|1	0|1	0|1	1|1	0|1	1|1	0|1	0,20	0,28	0,11	20,26	0,8	5,16	9,16	4,17	7,5	2,4	2,15	0,11	0,21	17,12	1,3	0,7	5,15	0,6	4,15
Unigene0005510	552	552	C	T	SNP	.	3599.34	0|1	0|1	0|1	1|1	0|1	0|1	1|1	0|0	1|1	1|1	.|.	0|1	1|1	1|1	0|1	1|1	0|1	0|1	1|1	2,11	1,10	1,4	1,14	2,2	2,4	0,15	4,1	0,8	0,7	.,.	3,5	1,4	0,8	5,4	0,5	1,9	3,1	0,2
Unigene0005515	696	696	C	T	SNP	.	37063.6	1|1	1|1	0|1	1|1	1|1	0|1	0|1	1|1	0|1	1|1	1|1	1|1	0|1	0|1	0|1	0|1	0|1	0|1	0|1	0,153	0,98	50,58	0,131	0,16	25,42	29,35	0,25	62,58	0,16	0,41	0,31	59,35	103141	18,40	19,32	125,79	8,19	60,25
Unigene0005515	755	755	A	G	SNP	.	25917.7	1|1	1|1	0|1	1|1	1|1	0|1	0|1	1|1	0|1	1|1	1|1	1|1	0|1	0|1	0|1	0|1	0|1	1|1	0|1	0,170	0,96	69,24	0,69	0,8	28,35	48,16	0,15	101,36	0,10	0,21	0,16	64,27	135,82	42,37	21,27	169,34	0,20	76,12
Unigene0005523	489	489	A	G	SNP	.	2902.1	1|1	0|1	1|1	1|1	1|1	1|1	0|1	.|.	1|1	1|1	1|1	.|.	1|1	1|1	0|0	0|1	.|.	1|1	.|.	0,1	2,11	0,2	0,3	0,2	0,4	3,10	.,.	0,2	0,27	0,5	.,.	0,3	0,2	1,0	7,4	.,.	0,4	.,.
Unigene0005525	560	560	C	T	SNP	.	7232.33	1|1	0|1	1|1	1|1	0|1	0|1	0|1	1|1	1|1	1|1	0|1	0|1	1|1	0|1	1|1	0|1	1|1	0|1	1|1	0,22	8,14	0,16	0,15	3,11	1,4	5,9	0,15	0,6	1,10	7,4	2,2	0,11	11,17	0,1	1,10	0,12	3,11	0,13
Unigene0005528	386	386	A	G	SNP	.	2010.75	1|1	0|1	0|1	0|1	1|1	0|1	1|1	1|1	0|1	1|1	1|1	1|1	0|1	0|1	.|.	1|1	0|1	1|1	1|1	0,2	1,5	2,2	2,9	0,1	1,7	0,1	0,1	1,4	0,3	0,2	0,6	1,3	4,2	.,.	0,1	1,4	0,3	0,1
Unigene0005555	159	159	T	C	SNP	.	2396.9	0|1	1|1	1|1	0|1	0|1	.|.	0|1	0|1	1|1	.|.	0|1	0|1	1|1	0|1	.|.	0|1	1|1	1|1	1|1	4,8	0,3	0,1	2,6	10,2	.,.	15,5	14,3	0,2	.,.	5,1	5,2	0,2	2,5	.,.	2,4	0,7	0,3	0,7
Unigene0005555	588	588	A	C	SNP	.	1328.26	0|0	1|1	0|1	0|1	0|1	1|1	0|1	0|0	1|1	1|1	0|1	0|0	0|1	1|1	.|.	1|1	0|1	1|1	0|1	23,0	0,3	7,2	2,5	6,4	0,3	5,2	19,1	0,5	0,4	5,1	2,0	1,1	0,2	.,.	0,1	6,2	0,1	2,2
Unigene0005555	618	618	G	T	SNP	.	3612.13	1|1	0|1	1|1	0|1	0|1	0|1	0|1	1|1	0|1	0|1	0|1	0|1	1|1	.|.	1|1	1|1	0|1	0|0	0|1	0,20	4,1	0,4	5,3	4,3	1,3	4,9	0,22	3,8	5,2	1,5	1,2	0,1	.,.	0,1	0,1	2,4	2,0	4,7
Unigene0005560	171	171	A	C	SNP	.	2047.09	0|0	0|0	0|0	1|1	1|1	.|.	1|1	0|0	1|1	0|0	0|0	1|1	.|.	0|1	0|0	0|1	1|1	0|0	1|1	7,0	1,0	1,0	0,5	0,9	.,.	0,9	5,0	0,4	3,0	2,0	0,3	.,.	1,8	1,0	2,7	0,5	1,0	0,5
Unigene0005560	193	193	C	G	SNP	.	661.55	1|1	1|1	1|1	0|0	0|0	.|.	0|0	1|1	0|0	1|1	1|1	0|0	.|.	0|1	1|1	0|1	0|0	.|.	0|0	0,6	0,1	0,1	6,0	8,0	.,.	10,0	0,2	6,0	0,3	0,2	5,0	.,.	6,1	0,1	7,2	4,0	.,.	5,0
Unigene0005560	262	262	A	G	SNP	.	1478.99	1|1	.|.	.|.	0|0	0|0	.|.	0|0	1|1	0|0	1|1	.|.	0|0	1|1	0|0	1|1	0|0	0|0	1|1	0|0	0,10	.,.	.,.	3,0	2,0	.,.	7,0	0,19	3,0	0,5	.,.	2,0	0,1	2,0	0,1	5,0	3,0	0,3	3,0
Unigene0005560	418	418	C	T	SNP	.	1029.13	1|1	0|1	1|1	.|.	.|.	.|.	1|1	1|1	0|1	1|1	1|1	.|.	0|1	.|.	0|1	.|.	.|.	0|0	.|.	0,3	2,2	0,1	.,.	.,.	.,.	0,1	0,16	5,1	0,2	0,1	.,.	3,1	.,.	1,1	.,.	.,.	3,0	.,.
Unigene0005560	603	603	A	G	SNP	.	1763.01	1|1	0|1	.|.	.|.	1|1	.|.	1|1	1|1	0|1	1|1	1|1	1|1	0|1	.|.	1|1	0|1	1|1	0|0	.|.	0,7	3,1	.,.	.,.	0,5	.,.	0,2	0,16	3,3	0,1	0,1	0,3	2,2	.,.	0,1	1,1	0,1	2,0	.,.
Unigene0005560	951	951	T	C	SNP	.	3816.43	0|1	0|0	0|0	1|1	1|1	.|.	0|1	0|1	0|1	0|1	0|1	1|1	0|0	1|1	0|1	1|1	1|1	0|0	1|1	9,10	1,0	1,0	0,6	0,11	.,.	2,8	39,17	3,8	6,6	1,2	0,3	4,0	0,8	2,3	0,12	0,2	5,0	0,10
Unigene0005566	1284	1284	A	T	SNP	.	7829.14	1|1	0|1	0|1	0|1	0|1	0|1	0|1	1|1	1|1	1|1	0|1	0|1	0|1	0|1	1|1	0|1	1|1	0|1	1|1	0,24	10,14	5,18	7,4	6,4	7,3	12,7	1,15	0,8	0,22	3,2	10,2	5,8	14,13	0,24	13,6	0,17	7,4	0,6
Unigene0005566	1393	1393	T	A	SNP	.	2494.78	.|.	0|1	0|1	1|1	0|1	1|1	1|1	1|1	0|1	0|1	0|0	0|1	0|1	1|1	0|1	1|1	0|0	0|1	0|0	.,.	2,10	3,3	0,6	3,5	0,8	0,7	0,2	1,2	8,1	3,0	1,7	2,2	0,13	3,2	0,1	8,0	4,2	3,0
Unigene0005569	228	228	A	G	SNP	.	6935.35	1|1	1|1	1|1	1|1	0|1	1|1	0|1	.|.	0|1	1|1	1|1	0|1	1|1	0|1	0|1	0|1	1|1	1|1	1|1	0,8	0,32	0,2	0,17	4,1	0,2	3,5	.,.	1,3	0,39	0,1	8,12	0,33	5,1	3,8	5,3	0,2	0,1	0,1
Unigene0005584	838	838	T	C	SNP	.	9222.42	1|1	0|1	0|1	0|1	1|1	0|1	1|1	1|1	1|1	0|1	0|1	1|1	1|1	0|1	1|1	1|1	1|1	1|1	1|1	0,32	20,18	7,3	5,23	0,8	14,11	0,6	0,12	0,20	9,12	7,13	0,9	0,11	13,9	0,10	0,9	0,17	0,7	0,11
Unigene0005584	906	906	C	T	SNP	.	4571.75	1|1	0|1	0|0	1|1	1|1	0|1	1|1	1|1	1|1	0|1	0|1	1|1	1|1	0|1	1|1	1|1	1|1	1|1	1|1	0,7	16,8	9,1	0,18	0,2	16,4	0,12	0,5	0,10	10,2	15,13	0,7	0,9	17,6	0,5	0,4	0,6	0,4	0,1
Unigene0005584	943	943	C	T	SNP	.	3693.47	1|1	0|1	0|0	1|1	1|1	0|0	1|1	1|1	1|1	0|0	0|1	1|1	1|1	0|1	1|1	1|1	1|1	1|1	.|.	0,1	14,2	9,0	0,14	0,3	15,1	0,16	0,3	0,4	9,0	16,12	0,5	0,10	17,8	0,4	0,6	0,2	0,3	.,.
Unigene0005584	996	996	A	G	SNP	.	2569.41	.|.	0|1	0|0	0|1	1|1	0|1	0|1	.|.	1|1	0|1	0|1	1|1	1|1	0|1	1|1	1|1	1|1	.|.	1|1	.,.	24,3	6,0	3,9	0,5	12,2	5,7	.,.	0,3	9,1	12,10	0,4	0,10	22,12	0,2	0,6	0,1	.,.	0,1
Unigene0005590	281	281	A	G	SNP	.	1309.11	1|1	1|1	1|1	0|1	1|1	.|.	0|1	0|1	0|1	1|1	1|1	0|1	.|.	0|1	.|.	0|1	0|1	.|.	1|1	0,9	0,3	0,1	3,4	0,1	.,.	1,3	4,3	1,3	0,1	0,1	1,1	.,.	4,1	.,.	1,3	1,1	.,.	0,3
Unigene0005596	418	418	C	T	SNP	.	1115.69	0|0	1|1	1|1	0|0	0|0	0|1	1|1	0|0	0|1	0|1	0|1	1|1	0|1	1|1	0|0	1|1	0|1	0|1	1|1	5,0	0,6	0,3	1,0	1,0	3,1	0,3	8,0	4,5	2,2	4,1	0,2	5,1	0,5	1,0	0,1	1,1	6,2	0,1
Unigene0005596	1528	1528	-	G	Insertion	.	539.88	0|1	1|1	0|1	0|0	0|0	.|.	0|1	0|0	1|1	.|.	.|.	0|0	.|.	0|1	.|.	1|1	1|1	1|1	1|1	1,1	0,4	1,1	2,0	3,0	.,.	1,1	1,0	0,1	.,.	.,.	1,0	.,.	1,1	.,.	0,2	0,3	0,1	0,1
Unigene0005601	445	445	A	G	SNP	.	546.04	1|1	1|1	.|.	.|.	0|1	.|.	0|0	1|1	0|0	0|0	1|1	1|1	1|1	1|1	1|1	0|0	0|0	1|1	0|0	0,1	0,2	.,.	.,.	1,2	.,.	3,0	0,1	3,0	3,0	0,1	0,2	0,2	0,1	0,1	1,0	1,0	0,2	2,0
Unigene0005602	249	249	A	G	SNP	.	820.12	1|1	1|1	.|.	0|1	0|1	1|1	0|0	1|1	1|1	.|.	1|1	0|0	1|1	1|1	.|.	.|.	0|1	.|.	0|0	0,7	0,2	.,.	5,2	4,1	0,2	1,0	0,1	0,1	.,.	0,1	6,0	0,1	0,1	.,.	.,.	1,2	.,.	8,0
Unigene0005602	254	254	A	G	SNP	.	740.06	1|1	1|1	.|.	0|1	0|1	1|1	0|0	1|1	1|1	.|.	.|.	0|0	1|1	1|1	.|.	.|.	0|1	.|.	0|0	0,6	0,2	.,.	6,2	5,1	0,2	1,0	0,1	0,1	.,.	.,.	6,0	0,1	0,1	.,.	.,.	1,2	.,.	7,0
Unigene0005607	278	278	A	G	SNP	.	1605.73	1|1	1|1	1|1	0|1	1|1	0|0	0|1	1|1	0|1	0|0	1|1	1|1	1|1	0|1	1|1	.|.	1|1	0|1	.|.	0,2	0,2	0,3	4,5	0,3	1,0	1,2	0,2	4,2	2,0	0,6	0,2	0,2	4,3	0,2	.,.	0,2	2,2	.,.
Unigene0005607	2235	2235	T	C	SNP	.	1717.45	0|1	0|1	0|0	0|1	1|1	0|1	0|1	1|1	0|1	0|1	0|1	1|1	1|1	0|1	1|1	1|1	0|1	.|.	0|1	1,4	12,12	6,0	10,4	0,2	7,3	2,3	0,6	8,1	3,3	3,5	0,1	0,3	10,1	0,1	0,3	10,2	.,.	6,2
Unigene0005614	514	514	T	C	SNP	.	17819.1	1|1	1|1	0|1	0|1	0|1	0|1	0|1	1|1	1|1	0|1	1|1	0|1	0|1	0|1	0|1	0|1	0|1	1|1	0|1	0,85	0,35	11,12	5,34	2,16	7,8	4,17	0,17	0,25	20,29	0,18	4,13	7,10	42,29	47,31	17,19	17,33	0,7	19,29
Unigene0005622	357	357	G	A	SNP	.	9986.8	0|0	1|1	0|1	1|1	1|1	0|1	1|1	0|0	0|1	0|1	1|1	1|1	0|1	1|1	1|1	1|1	1|1	0|1	1|1	29,0	0,2	15,20	0,23	0,14	11,9	0,22	27,0	14,23	46,9	0,19	0,16	28,16	0,30	0,8	0,2	0,13	8,4	0,10
Unigene0005622	370	370	C	T	SNP	.	8726.69	0|0	1|1	0|1	1|1	0|1	0|1	0|1	0|0	0|1	0|1	0|1	0|1	0|1	0|1	1|1	1|1	1|1	0|1	1|1	36,0	0,10	27,11	0,31	7,10	11,11	15,12	34,0	16,29	49,11	11,12	7,11	33,16	15,23	0,15	0,5	0,20	8,4	0,16
Unigene0005624	840	840	C	T	SNP	.	4546.81	1|1	0|1	0|1	0|1	0|1	1|1	1|1	.|.	1|1	0|1	1|1	1|1	1|1	1|1	0|1	0|1	0|1	1|1	0|1	0,7	2,6	2,5	6,5	2,4	0,6	0,5	.,.	0,9	2,7	0,8	0,4	0,11	0,22	6,2	1,4	4,6	0,2	6,11
Unigene0005630	165	165	T	C	SNP	.	1889.65	0|0	0|0	1|1	0|0	1|1	0|1	0|0	0|0	0|1	0|1	0|0	1|1	0|1	1|1	0|0	.|.	1|1	0|1	1|1	28,1	50,0	0,2	19,0	0,7	12,5	23,0	42,2	7,1	16,2	8,0	0,1	12,12	0,2	6,0	.,.	0,4	13,4	0,10
Unigene0005630	649	649	C	T	SNP	.	733.82	0|0	1|1	1|1	0|1	0|1	0|1	0|1	0|1	0|1	1|1	0|0	0|0	1|1	0|0	0|1	0|0	1|1	1|1	1|1	8,0	0,2	0,1	2,2	1,1	1,1	2,2	3,1	4,1	0,2	2,0	1,0	0,1	1,0	3,2	1,0	0,1	0,1	0,4
Unigene0005630	695	695	C	T	SNP	.	3356.05	0|1	0|0	1|1	0|1	1|1	0|1	0|1	0|1	0|1	0|1	0|1	1|1	0|1	1|1	0|1	1|1	1|1	0|1	1|1	7,17	14,1	0,1	5,2	0,5	2,4	7,2	10,10	1,7	7,6	1,2	0,3	6,8	0,3	7,3	0,1	0,2	3,3	0,13
Unigene0005630	765	765	A	G	SNP	.	2866.64	0|1	0|1	.|.	1|1	0|0	0|1	0|1	1|1	0|1	0|1	1|1	0|0	0|1	1|1	1|1	0|0	1|1	0|1	0|1	2,15	1,11	.,.	0,3	3,0	3,1	6,3	1,15	2,2	4,6	0,1	2,0	6,9	0,3	1,4	2,0	0,2	3,3	10,1
Unigene0005635	120	120	C	G	SNP	.	1184.9	0|0	0|0	1|1	0|0	.|.	1|1	1|1	.|.	1|1	.|.	.|.	0|0	1|1	1|1	0|1	.|.	1|1	.|.	1|1	14,0	3,0	0,1	2,0	.,.	0,1	0,7	.,.	0,1	.,.	.,.	1,0	0,2	0,1	4,3	.,.	0,10	.,.	0,8
Unigene0005635	485	485	A	C	SNP	.	628.69	0|1	.|.	.|.	0|1	0|0	1|1	1|1	1|1	0|1	0|0	0|0	.|.	.|.	1|1	1|1	1|1	1|1	.|.	1|1	1,4	.,.	.,.	8,2	1,0	0,1	0,1	0,3	5,1	1,0	1,0	.,.	.,.	0,1	0,2	0,1	0,1	.,.	0,3
Unigene0005639	110	110	A	G	SNP	.	870.19	0|1	0|1	1|1	0|1	.|.	.|.	0|1	1|1	0|1	0|0	.|.	0|0	0|1	1|1	.|.	1|1	0|1	1|1	1|1	2,5	2,1	0,1	2,5	.,.	.,.	4,1	0,1	5,1	1,0	.,.	2,0	6,2	0,2	.,.	0,2	3,1	0,1	0,2
Unigene0005639	390	390	G	A	SNP	.	1134.5	1|1	1|1	1|1	0|1	1|1	.|.	0|0	1|1	0|1	0|0	0|0	0|1	0|0	1|1	1|1	1|1	0|1	0|1	0|0	0,4	0,5	0,2	1,4	0,1	.,.	6,0	0,2	3,1	2,0	2,0	2,3	1,0	0,1	0,1	0,3	2,3	2,2	3,0
Unigene0005643	1270	1270	T	C	SNP	.	323.29	1|1	1|1	.|.	0|0	0|1	.|.	0|0	.|.	0|1	1|1	.|.	.|.	1|1	0|0	1|1	1|1	0|0	0|0	0|1	0,1	0,1	.,.	1,0	1,2	.,.	4,0	.,.	2,1	0,2	.,.	.,.	0,1	3,0	0,2	0,1	3,0	2,0	2,1
Unigene0005644	3526	3526	C	T	SNP	.	6452.66	1|1	1|1	1|1	0|1	1|1	1|1	0|1	1|1	1|1	1|1	1|1	1|1	1|1	0|1	0|1	1|1	0|1	1|1	0|1	0,15	0,10	0,15	2,12	0,13	0,6	2,9	0,7	0,8	0,8	0,7	0,9	0,5	2,12	3,13	0,7	1,5	0,3	3,9
Unigene0005644	3545	3545	A	T	SNP	.	5271.08	1|1	1|1	1|1	0|1	0|1	1|1	0|1	0|1	1|1	1|1	0|1	0|1	1|1	0|1	0|1	1|1	0|1	1|1	0|1	0,15	0,7	0,13	2,14	4,7	0,6	4,4	3,1	0,8	0,5	1,4	3,5	0,2	3,14	2,12	0,7	1,3	0,3	3,12
Unigene0005645	835	835	C	A	SNP	.	8506.55	0|1	1|1	0|1	0|1	0|1	0|1	1|1	0|1	1|1	1|1	0|1	0|1	0|1	1|1	1|1	1|1	0|1	0|1	1|1	36,15	0,24	6,12	1,1	11,7	1,5	0,10	5,22	0,23	0,1	6,8	3,1	5,6	0,19	2,20	0,2	4,44	1,6	0,4
Unigene0005648	719	719	G	C	SNP	.	3418.09	1|1	1|1	0|1	0|1	0|0	1|1	0|1	1|1	0|1	1|1	0|1	0|1	0|1	0|1	0|1	1|1	0|1	1|1	0|1	0,14	0,1	3,5	2,9	5,0	0,2	10,8	0,2	1,4	0,6	1,5	1,6	3,1	2,6	4,3	0,7	4,2	0,5	6,6
Unigene0005651	311	311	A	G	SNP	.	9194.98	1|1	1|1	1|1	1|1	1|1	0|1	1|1	1|1	0|1	0|1	1|1	1|1	1|1	1|1	1|1	1|1	0|1	0|1	0|1	0,4	0,15	0,9	0,33	0,15	4,7	0,25	0,20	2,10	2,8	0,12	0,17	0,2	0,26	0,2	0,9	2,5	3,4	17,17
Unigene0005655	1135	1135	A	G	SNP	.	22565.9	1|1	0|1	0|1	0|1	0|1	1|1	0|1	1|1	0|1	1|1	1|1	0|1	1|1	1|1	0|1	0|1	1|1	1|1	1|1	0,39	15,65	3,23	17,23	9,19	0,24	12,32	2,28	5,8	0,89	0,40	8,11	0,40	0,40	5,41	13,15	0,27	0,24	0,36
Unigene0005662	450	450	A	T	SNP	.	1417.71	1|1	1|1	.|.	1|1	.|.	1|1	1|1	0|1	1|1	0|1	1|1	.|.	0|0	1|1	0|1	0|1	0|0	.|.	0|0	0,7	.	.,.	0,2	.,.	0,1	0,4	1,7	0,5	4,2	0,2	.,.	2,0	.	2,1	1,5	5,0	.,.	1,0
Unigene0005662	553	553	A	G	SNP	.	1565.08	0|0	1|1	1|1	1|1	.|.	1|1	.|.	0|0	0|1	1|1	1|1	.|.	1|1	1|1	0|1	0|1	1|1	1|1	1|1	11,0	0,5	0,1	0,1	.,.	0,1	.,.	17,0	5,1	0,7	0,3	.,.	0,7	0,5	5,4	2,3	0,2	0,1	0,1
Unigene0005662	705	705	A	G	SNP	.	1866.97	1|1	0|1	0|1	0|1	1|1	0|1	1|1	1|1	0|1	0|1	0|0	1|1	0|1	0|1	0|1	1|1	0|1	0|1	0|1	0,4	1,2	1,2	2,2	0,4	3,2	0,4	0,5	3,3	15,3	3,0	0,4	7,2	4,3	6,2	0,4	2,3	3,1	3,4
Unigene0005663	302	302	C	T	SNP	.	896.38	0|1	0|1	1|1	0|1	0|1	1|1	0|0	0|1	1|1	1|1	0|1	1|1	1|1	0|1	.|.	0|0	0|0	0|1	.|.	2,1	2,0	0,2	2,3	2,2	0,3	1,0	4,3	0,1	0,1	1,1	0,2	0,2	1,3	.,.	2,0	3,0	1,1	.,.
Unigene0005673	1022	1022	C	G	SNP	.	882.47	.|.	0|0	1|1	0|1	1|1	0|1	0|1	0|1	0|1	0|1	1|1	1|1	1|1	0|1	0|0	0|0	0|1	1|1	0|1	.,.	10,0	0,3	7,1	0,1	3,1	4,2	5,1	8,2	5,4	0,1	0,1	0,2	5,1	1,0	6,0	6,1	0,4	3,2
Unigene0005688	202	202	C	T	SNP	.	1065.56	0|1	0|1	1|1	0|0	.|.	0|1	1|1	0|0	0|1	0|1	0|0	1|1	1|1	0|1	0|1	0|1	1|1	1|1	0|1	5,2	1,5	0,1	2,0	.,.	1,1	0,1	7,0	1,0	2,1	1,0	0,1	0,3	1,2	2,3	1,2	0,2	0,1	2,4
Unigene0005695	902	902	C	T	SNP	.	3192.32	1|1	0|1	0|1	0|1	1|1	1|1	0|1	1|1	0|1	1|1	1|1	1|1	.|.	0|1	0|1	1|1	0|1	1|1	0|1	0,7	1,6	1,1	1,13	0,2	0,9	3,1	0,5	1,1	0,5	0,5	0,3	.,.	2,6	3,5	0,1	2,2	0,1	4,7
Unigene0005713	136	136	A	G	SNP	.	1103.87	0|1	0|1	1|1	1|1	0|1	1|1	1|1	0|1	.|.	0|1	0|0	.|.	1|1	0|1	.|.	1|1	0|1	0|0	1|1	1,3	1,2	0,2	0,7	2,1	0,1	0,1	3,1	.,.	1,2	1,0	.,.	0,1	2,3	.,.	0,5	2,5	1,0	0,2
Unigene0005714	248	248	A	G	SNP	.	21456.2	0|1	1|1	0|1	0|1	1|1	0|1	0|1	1|1	1|1	1|1	1|1	0|1	1|1	1|1	1|1	1|1	1|1	0|1	1|1	10,17	0,33	3,19	9,35	0,9	2,14	5,22	0,27	1,59	2,27	0,19	2,6	1,36	2,69	0,9	1,25	1,71	2,16	0,59
Unigene0005714	941	941	G	T	SNP	.	6690.3	1|1	0|1	0|1	0|1	0|1	1|1	0|1	1|1	0|1	0|1	1|1	1|1	1|1	0|1	0|1	1|1	0|1	1|1	0|1	0,10	5,13	6,7	1,12	4,11	0,6	7,10	0,10	5,12	3,14	0,11	1,8	1,9	1,7	6,8	0,8	4,12	0,5	4,16
Unigene0005714	971	971	C	A	SNP	.	2903.88	1|1	0|1	0|1	0|1	0|1	0|1	0|1	1|1	0|1	0|1	1|1	0|1	0|1	1|1	0|1	1|1	0|1	1|1	0|1	0,3	7,4	5,7	3,6	2,4	1,2	5,10	0,2	3,1	6,8	0,3	2,6	1,3	0,4	4,4	0,3	4,6	0,3	4,5
Unigene0005714	1000	1000	G	A	SNP	.	4136.44	1|1	0|1	0|1	1|1	0|1	0|1	0|1	1|1	0|1	0|1	1|1	0|1	1|1	1|1	0|1	0|1	0|1	1|1	0|1	0,5	6,9	4,2	0,10	2,4	1,5	7,9	0,8	3,5	4,13	0,3	3,4	0,8	0,13	4,2	1,2	4,10	0,3	4,3
Unigene0005714	1346	1346	C	T	SNP	.	10448.9	0|1	0|1	1|1	0|1	0|1	1|1	1|1	0|1	1|1	1|1	0|1	0|1	1|1	0|1	0|1	1|1	0|1	1|1	1|1	15,8	19,25	1,20	5,22	2,15	0,11	0,20	17,7	0,17	0,25	1,8	2,9	0,11	6,24	3,19	0,17	7,14	0,8	0,11
Unigene0005714	1478	1478	C	T	SNP	.	1094.45	1|1	0|0	.|.	1|1	.|.	1|1	1|1	1|1	0|1	0|0	0|0	1|1	0|1	0|1	0|0	0|0	0|1	0|1	0|1	0,3	2,0	.,.	0,8	.,.	0,1	0,2	0,2	3,3	1,0	1,0	0,1	3,3	1,4	1,0	1,0	3,1	2,1	3,1
Unigene0005716	279	279	A	T	SNP	.	1269.6	0|0	0|1	0|1	0|1	1|1	0|1	1|1	0|0	0|0	1|1	0|0	1|1	.|.	1|1	.|.	.|.	1|1	0|0	0|1	1,0	3,3	2,1	1,3	0,3	1,1	0,3	2,0	2,0	0,1	1,0	0,7	.,.	0,6	.,.	.,.	0,6	1,0	1,2
Unigene0005716	289	289	A	G	SNP	.	912.79	1|1	0|1	0|1	0|1	0|1	1|1	0|1	1|1	1|1	1|1	1|1	0|1	0|0	0|1	.|.	.|.	0|1	.|.	0|1	0,1	2,4	1,2	2,2	2,1	0,3	2,1	0,2	0,1	0,1	0,1	3,3	1,0	5,1	.,.	.,.	3,2	.,.	1,2
Unigene0005736	972	972	T	C	SNP	.	2088.32	1|1	1|1	0|0	0|0	1|1	0|0	0|1	1|1	0|1	0|1	1|1	.|.	0|1	1|1	0|1	.|.	0|1	0|1	0|1	0,3	0,4	6,0	12,0	0,4	1,0	4,7	0,13	9,4	13,2	0,2	.,.	7,2	0,2	3,3	.,.	11,6	4,6	22,3
Unigene0005754	275	275	A	C	SNP	.	4812.29	1|1	0|1	0|1	1|1	0|1	0|1	0|1	1|1	0|1	0|1	0|1	0|1	0|1	1|1	0|1	1|1	1|1	1|1	1|1	0,10	9,4	1,4	0,10	5,1	1,6	2,5	0,3	5,16	4,7	14,3	4,1	6,6	0,12	1,9	0,2	0,6	0,2	0,30
Unigene0005754	1124	1124	C	G	SNP	.	4210.63	1|1	0|1	1|1	0|1	0|0	0|1	0|1	1|1	1|1	0|1	0|1	0|1	1|1	0|1	0|1	0|1	1|1	1|1	1|1	0,3	8,8	0,11	18,5	15,1	1,5	5,7	0,1	0,9	13,13	11,13	5,1	0,7	9,8	3,4	7,3	0,12	0,2	0,6
Unigene0005775	295	295	C	G	SNP	.	672.68	0|1	1|1	.|.	0|1	1|1	0|1	.|.	1|1	.|.	.|.	1|1	.|.	1|1	0|1	0|1	1|1	0|1	1|1	1|1	1,1	0,1	.,.	1,2	0,1	1,1	.,.	0,2	.,.	.,.	0,1	.,.	0,2	2,1	5,2	0,1	1,1	0,1	0,2
Unigene0005783	278	278	C	T	SNP	.	3732.48	1|1	1|1	1|1	1|1	0|1	0|1	0|1	1|1	0|1	0|1	1|1	0|1	1|1	0|1	0|1	1|1	0|1	1|1	0|1	0,9	0,9	0,1	0,17	2,3	1,5	6,6	0,7	3,8	2,7	0,2	3,6	0,3	8,10	3,2	0,4	1,4	0,2	1,4
Unigene0005790	274	274	A	C	SNP	.	2756.39	1|1	0|1	1|1	1|1	1|1	0|1	0|1	1|1	1|1	0|1	0|1	1|1	1|1	1|1	0|1	0|1	1|1	0|1	1|1	0,4	2,7	0,5	0,5	0,5	3,1	1,3	0,4	0,2	7,4	4,2	0,4	0,8	0,4	3,5	1,2	0,1	2,3	0,4
Unigene0005794	275	275	A	T	SNP	.	1567.21	1|1	1|1	0|1	0|1	0|1	1|1	0|1	1|1	1|1	1|1	1|1	1|1	0|1	0|1	0|0	0|0	0|1	0|0	0|1	0,2	0,6	1,3	4,2	1,2	0,1	4,1	0,3	0,4	0,3	0,2	0,1	1,4	6,5	1,0	2,0	6,4	1,0	2,3
Unigene0005800	104	104	A	G	SNP	.	741.64	0|0	0|0	0|1	1|1	1|1	0|0	1|1	0|1	0|0	0|0	.|.	1|1	1|1	0|1	0|0	0|0	0|1	0|0	1|1	2,0	3,0	2,2	0,3	0,2	2,0	0,2	4,1	3,0	4,0	.,.	0,1	0,2	2,4	1,0	2,0	1,4	1,0	0,1
Unigene0005802	126	126	G	A	SNP	.	1155.51	1|1	0|0	0|0	1|1	.|.	1|1	0|0	0|0	1|1	1|1	0|1	1|1	.|.	.|.	0|0	.|.	0|0	.|.	.|.	0,2	278,0	1,0	0,3	.,.	0,1	1,0	1,0	0,3	0,27	2,1	0,1	.,.	.,.	111,0	.,.	1,0	.,.	.,.
Unigene0005802	764	764	A	G	SNP	.	918.83	1|1	0|0	.|.	0|1	.|.	1|1	0|0	1|1	0|0	1|1	1|1	1|1	.|.	0|1	0|0	1|1	1|1	1|1	0|1	0,2	298,2	.,.	1,6	.,.	0,3	2,0	0,1	4,0	0,5	0,1	0,1	.,.	1,1	300,1	0,2	0,1	0,1	1,2
Unigene0005802	822	822	T	C	SNP	.	1059.44	1|1	0|0	.|.	1|1	0|1	1|1	.|.	1|1	.|.	1|1	.|.	1|1	1|1	0|0	0|0	0|1	0|1	1|1	0|1	0,2	244,0	.,.	0,4	1,1	0,4	.,.	0,1	.,.	0,8	.,.	0,2	0,2	2,0	209,0	1,1	4,1	0,1	1,1
Unigene0005803	117	117	C	T	SNP	.	1343.01	1|1	0|0	1|1	1|1	0|1	0|1	1|1	1|1	0|0	0|0	.|.	1|1	0|1	0|1	0|0	0|1	0|0	0|0	0|1	0,4	3,0	0,3	0,1	2,6	1,1	0,4	0,5	2,0	5,0	.,.	0,4	2,1	6,1	4,0	2,3	4,0	3,0	5,1
Unigene0005803	119	119	T	C	SNP	.	1343.01	1|1	0|0	1|1	1|1	0|1	0|1	1|1	1|1	0|0	0|0	.|.	1|1	0|1	0|1	0|0	0|1	0|0	0|0	0|1	0,4	3,0	0,3	0,1	2,6	1,1	0,4	0,5	2,0	5,0	.,.	0,4	2,1	6,1	4,0	2,3	4,0	3,0	5,1
Unigene0005803	978	978	C	G	SNP	.	3229.78	0|1	0|1	0|1	0|1	1|1	0|1	0|1	0|1	0|1	1|1	0|1	1|1	0|1	1|1	0|1	1|1	1|1	0|1	0|1	8,1	9,2	1,5	6,11	0,9	1,3	1,13	8,11	4,2	0,2	5,2	0,4	1,1	0,4	2,2	0,1	0,2	6,5	3,8
Unigene0005803	1109	1109	C	T	SNP	.	868.9	0|0	0|1	1|1	0|1	1|1	0|0	1|1	0|1	.|.	.|.	1|1	.|.	0|1	1|1	.|.	.|.	.|.	0|0	1|1	1,0	3,1	0,3	1,3	0,5	2,0	0,4	1,7	.,.	.,.	0,2	.,.	1,2	0,1	.,.	.,.	.,.	1,0	0,2
Unigene0005829	891	891	C	T	SNP	.	7589.83	1|1	1|1	1|1	1|1	0|1	1|1	0|1	0|1	0|1	.|.	1|1	1|1	1|1	1|1	0|1	0|1	1|1	.|.	0|1	0,37	0,8	0,3	0,25	4,2	0,5	9,3	1,2	4,6	.,.	0,6	0,4	0,8	0,25	40,29	1,0	2,30	.,.	5,18
Unigene0005835	112	112	A	G	SNP	.	2583.94	0|1	0|1	0|0	1|1	0|1	1|1	0|1	0|1	1|1	1|1	0|1	0|1	1|1	0|1	.|.	0|1	0|1	1|1	0|1	5,6	4,6	1,0	0,2	6,2	0,2	1,6	17,3	0,12	0,3	2,2	2,3	0,9	6,5	.,.	1,2	1,12	0,2	2,2
Unigene0005835	659	659	T	C	SNP	.	364.77	1|1	0|0	1|1	0|1	1|1	.|.	0|0	.|.	1|1	.|.	.|.	1|1	.|.	.|.	.|.	1|1	1|1	.|.	1|1	0,1	2,0	0,2	1,1	0,1	.,.	1,0	.,.	0,1	.,.	.,.	0,1	.,.	.,.	.,.	0,1	0,1	.,.	0,1
Unigene0005836	655	655	A	T	SNP	.	1516.93	0|1	0|1	1|1	1|1	0|1	0|0	1|1	0|1	0|1	.|.	1|1	.|.	0|0	1|1	0|0	1|1	0|1	.|.	0|1	7,1	1,7	0,1	0,5	1,2	1,0	0,2	3,3	2,3	.,.	0,4	.,.	2,0	0,3	1,0	0,4	1,5	.,.	1,2
Unigene0005836	1128	1128	A	G	SNP	.	1159.22	0|1	1|1	1|1	1|1	0|1	1|1	1|1	1|1	1|1	.|.	0|1	0|1	0|1	.|.	.|.	1|1	1|1	0|1	0|1	1,2	0,2	0,1	0,1	2,3	0,1	0,1	0,3	0,4	.,.	1,1	2,1	1,1	.,.	.,.	0,2	0,2	1,4	1,2
Unigene0005836	1158	1158	C	-	Deletion	.	1470.11	0|1	1|1	1|1	1|1	0|1	1|1	1|1	1|1	1|1	.|.	0|0	0|1	0|1	0|0	.|.	1|1	0|1	0|1	0|1	1,2	0,3	0,2	0,1	3,5	0,3	0,2	0,3	0,14	.,.	2,0	3,1	2,2	2,0	.,.	0,3	1,3	2,5	1,3
Unigene0005842	1670	1670	A	T	SNP	.	9183.77	1|1	1|1	0|1	1|1	0|1	0|1	1|1	0|1	0|1	0|1	0|1	0|1	1|1	1|1	1|1	0|1	1|1	0|1	1|1	0,20	2,27	1,4	1,39	2,6	1,7	0,14	4,18	1,13	2,5	2,6	3,7	0,13	0,28	0,10	1,9	0,10	1,5	0,12
Unigene0005844	311	311	C	T	SNP	.	1536.68	1|1	0|1	0|1	0|1	1|1	0|1	0|1	1|1	0|1	0|0	0|0	1|1	.|.	0|1	.|.	1|1	0|1	1|1	0|1	0,4	1,5	2,5	2,9	0,2	1,7	2,1	0,1	3,1	1,0	1,0	0,1	.,.	2,4	.,.	0,1	4,1	0,1	2,2
Unigene0005844	2666	2666	C	T	SNP	.	3197.23	1|1	0|1	0|1	0|1	1|1	0|1	1|1	0|1	0|1	1|1	1|1	0|1	0|1	0|1	0|1	1|1	1|1	1|1	0|1	0,7	2,13	1,2	1,6	0,1	3,7	0,2	2,3	2,3	0,12	0,3	1,2	2,5	2,14	3,3	0,1	1,8	0,1	3,1
Unigene0005845	97	97	C	T	SNP	.	1611.06	1|1	1|1	1|1	0|0	1|1	1|1	0|1	1|1	0|1	1|1	1|1	.|.	1|1	1|1	.|.	.|.	0|0	1|1	.|.	0,9	0,7	0,2	5,0	0,1	0,1	1,4	0,2	4,3	0,2	0,2	.,.	0,2	0,8	.,.	.,.	4,0	0,3	.,.
Unigene0005848	951	951	G	T	SNP	.	3643.48	1|1	0|1	0|1	0|1	0|1	1|1	0|1	1|1	1|1	0|1	1|1	0|1	1|1	1|1	1|1	0|1	0|1	1|1	0|1	0,8	9,5	10,7	12,5	9,11	0,2	17,3	0,12	0,4	13,10	0,4	8,7	0,1	0,6	0,4	5,4	2,5	0,2	5,3
Unigene0005848	1213	1213	A	G	SNP	.	825.05	.|.	1|1	.|.	1|1	.|.	0|0	1|1	0|0	1|1	0|0	1|1	.|.	.|.	1|1	0|1	1|1	.|.	1|1	.|.	.,.	0,4	.,.	0,2	.,.	1,0	0,2	1,0	0,4	1,0	0,2	.,.	.,.	0,2	2,4	0,1	.,.	0,2	.,.
Unigene0005851	150	150	A	G	SNP	.	11113.3	1|1	0|1	1|1	1|1	0|1	1|1	1|1	1|1	1|1	0|0	1|1	0|1	0|1	0|1	1|1	1|1	0|1	0|1	0|1	0,6	14,4	0,13	0,10	8,3	0,19	0,9	0,1	0,40	13,0	0,20	2,4	12,2	13,46	0,40	0,7	8,23	3,1	16,42
Unigene0005851	186	186	A	C	SNP	.	10114.9	1|1	0|1	0|1	1|1	0|0	1|1	0|1	1|1	1|1	0|0	1|1	0|0	0|1	0|1	0|1	0|1	0|1	0|1	0|1	0,4	17,3	3,23	0,13	12,0	0,21	15,5	0,1	1,52	13,0	0,28	8,0	14,2	42,29	20,45	10,4	29,18	3,1	37,42
Unigene0005853	114	114	T	C	SNP	.	5272.36	1|1	1|1	0|1	0|1	1|1	0|1	1|1	1|1	1|1	0|1	0|1	1|1	0|1	0|1	0|1	0|1	0|1	0|1	0|1	0,14	0,18	3,10	19,15	0,10	9,2	0,10	0,1	2,15	1,3	3,1	0,4	10,7	2,10	5,2	2,5	15,7	1,6	17,13
Unigene0005856	1168	1168	T	A	SNP	.	1995.49	0|1	1|1	0|1	0|1	0|1	.|.	0|0	0|0	0|1	1|1	0|0	0|1	1|1	1|1	0|1	1|1	0|1	1|1	0|1	2,8	0,2	2,3	6,5	9,1	.,.	2,0	15,1	4,10	0,1	4,0	1,3	0,3	0,2	2,4	0,2	4,5	0,1	2,6
Unigene0005874	213	213	A	T	SNP	.	1499.17	1|1	1|1	0|1	0|1	0|0	1|1	0|1	.|.	1|1	.|.	.|.	1|1	.|.	.|.	.|.	1|1	0|1	.|.	1|1	0,8	0,6	5,1	2,6	1,0	0,3	3,1	.,.	0,2	.,.	.,.	0,3	.,.	.,.	.,.	0,2	5,4	.,.	0,2
Unigene0005880	291	291	A	G	SNP	.	5205.88	1|1	1|1	1|1	0|1	0|1	1|1	1|1	0|1	0|1	1|1	1|1	0|1	0|1	0|1	0|0	1|1	1|1	1|1	1|1	0,4	0,9	0,1	2,16	3,6	0,9	0,11	3,6	3,9	0,5	0,6	2,9	1,4	2,13	5,0	0,5	0,14	0,5	0,15
Unigene0005892	309	309	A	T	SNP	.	661.93	1|1	1|1	.|.	1|1	.|.	1|1	1|1	1|1	.|.	0|0	0|1	.|.	0|0	0|0	0|0	0|0	1|1	.|.	1|1	0,1	0,2	.,.	0,4	.,.	0,1	0,3	0,2	.,.	2,0	2,2	.,.	2,0	1,0	1,0	2,0	0,2	.,.	0,2
Unigene0005894	143	143	G	A	SNP	.	379.63	1|1	0|0	1|1	0|0	0|0	1|1	0|0	1|1	1|1	.|.	.|.	0|0	0|1	0|0	1|1	0|0	0|1	.|.	0|0	0,2	1,0	0,3	2,0	5,0	0,2	1,0	0,1	0,1	.,.	.,.	18,0	2,1	7,0	0,1	1,0	2,1	.,.	4,0
Unigene0005894	244	244	T	A	SNP	.	1432.95	1|1	0|0	1|1	0|1	0|1	.|.	0|1	1|1	1|1	1|1	0|1	0|1	0|1	0|1	0|1	1|1	0|1	0|1	1|1	0,2	4,0	0,2	3,4	6,1	.,.	3,1	0,7	0,2	0,2	3,2	6,3	3,2	7,1	2,1	0,1	2,6	1,1	0,2
Unigene0005894	299	299	A	T	SNP	.	2381.07	0|0	1|1	0|0	0|1	1|1	0|0	1|1	0|0	1|1	1|1	0|1	1|1	0|1	1|1	0|1	1|1	0|1	0|0	1|1	2,0	0,4	2,0	1,8	0,8	1,0	0,3	9,0	0,4	0,1	2,4	0,11	3,3	0,6	1,1	0,3	1,5	1,0	0,4
Unigene0005894	1771	1771	T	C	SNP	.	1221.86	1|1	0|0	1|1	1|1	0|1	1|1	0|1	0|1	1|1	.|.	0|0	0|1	0|0	0|0	0|1	0|0	0|1	1|1	0|1	0,2	6,0	0,4	0,4	2,2	0,1	1,2	1,3	0,3	.,.	1,0	7,1	4,0	3,0	1,2	1,0	1,2	0,1	3,6
Unigene0005898	379	379	A	G	SNP	.	2361.66	1|1	0|0	0|1	0|1	1|1	0|1	.|.	1|1	0|1	.|.	0|1	1|1	0|0	0|1	1|1	1|1	0|1	0|0	1|1	0,1	2,0	4,5	10,4	0,2	10,11	.,.	0,5	6,1	.,.	5,4	0,1	1,0	7,16	0,2	0,1	6,6	3,0	1,14
Unigene0005899	512	512	G	C	SNP	.	429.15	0|0	0|0	1|1	1|1	1|1	1|1	1|1	0|1	0|0	1|1	0|0	0|1	0|0	0|0	0|0	0|0	.|.	0|1	0|0	4,0	7,0	0,1	0,2	0,1	0,1	0,3	6,2	8,0	0,1	3,0	1,2	2,0	1,0	5,0	1,0	.,.	2,1	3,0
Unigene0005899	613	613	C	G	SNP	.	1609.84	1|1	0|0	1|1	1|1	1|1	1|1	.|.	1|1	0|0	1|1	0|0	1|1	0|0	0|1	0|1	0|1	.|.	.|.	0|1	0,3	6,0	0,2	0,2	0,2	0,1	.,.	0,16	9,0	0,6	1,0	0,4	3,0	1,1	6,1	2,2	.,.	.,.	1,2
Unigene0005902	1106	1106	C	T	SNP	.	1742.81	0|1	0|1	0|1	1|1	0|1	1|1	0|1	0|0	0|1	0|1	1|1	1|1	1|1	0|1	0|1	.|.	1|1	1|1	1|1	1,3	2,8	0,2	0,6	4,3	0,5	4,4	5,0	1,2	2,3	0,3	0,3	0,2	4,5	3,3	.,.	0,2	0,1	0,2
Unigene0005902	1134	1134	A	C	SNP	.	1856.06	1|1	1|1	1|1	0|1	0|1	0|1	0|1	1|1	1|1	0|1	0|1	0|1	1|1	1|1	1|1	.|.	1|1	.|.	1|1	0,1	0,2	0,1	2,3	1,2	2,2	2,2	0,3	0,3	1,2	4,2	2,2	0,2	0,5	0,5	.,.	0,3	.,.	0,4
Unigene0005904	192	192	G	T	SNP	.	2081.63	1|1	0|1	1|1	0|1	1|1	0|1	0|1	1|1	1|1	1|1	0|1	0|1	1|1	1|1	1|1	0|1	0|1	1|1	.|.	0,6	5,6	0,1	3,3	0,2	1,2	4,2	0,1	0,3	0,3	3,1	1,1	0,3	0,12	0,16	2,7	3,2	0,3	.,.
Unigene0005911	1427	1427	C	T	SNP	.	15742.1	0|1	0|1	0|1	0|1	1|1	0|1	1|1	0|1	0|1	0|1	1|1	1|1	0|1	1|1	1|1	0|1	0|1	0|1	0|1	16,26	12,36	6,16	11,38	0,17	5,22	0,33	10,57	8,20	6,18	0,26	0,25	17,16	0,26	0,6	6,13	22,22	10,8	22,10
Unigene0005922	781	781	C	G	SNP	.	16142.9	1|1	1|1	0|0	1|1	1|1	.|.	0|1	1|1	0|1	1|1	1|1	1|1	0|1	0|1	0|1	0|1	1|1	0|1	1|1	0,26	0,96	1,0	0,16	0,10	.,.	14,49	1,30	2,7	0,34	1,20	0,13	14,4	3,14	4,5	5,40	0,5	8,6	1,26
Unigene0005922	1627	1627	C	T	SNP	.	11601.8	0|1	0|1	1|1	1|1	0|1	0|1	1|1	0|1	1|1	0|1	0|1	0|1	1|1	0|1	0|1	0|1	1|1	1|1	1|1	22,52	57,56	0,4	0,12	6,4	7,18	0,43	75,36	0,8	26,11	15,8	3,5	0,2	10,8	2,6	3,5	0,5	1,15	0,26
Unigene0005925	473	473	C	T	SNP	.	17639.2	1|1	1|1	0|1	0|1	0|1	1|1	0|1	1|1	1|1	1|1	1|1	0|1	0|1	0|1	0|1	0|1	0|1	1|1	0|1	0,30	0,59	1,13	22,13	4,4	0,19	15,20	0,36	1,24	0,107	0,22	4,6	9,8	11,31	26,23	5,15	12,14	0,15	16,19
Unigene0005929	238	238	A	G	SNP	.	18619.7	1|1	0|1	0|1	0|1	1|1	0|1	1|1	1|1	0|1	1|1	0|1	1|1	1|1	1|1	1|1	0|1	0|1	0|1	0|1	0,29	16,49	10,23	12,37	0,15	4,12	0,50	0,23	10,26	0,8	6,15	0,12	0,42	0,40	0,11	7,21	8,36	4,12	9,25
Unigene0005929	300	300	G	T	SNP	.	1022.35	1|1	0|1	0|0	1|1	1|1	0|1	1|1	.|.	0|0	1|1	0|1	.|.	1|1	1|1	.|.	0|0	0|1	0|1	0|1	0,3	6,3	4,0	0,2	0,2	2,2	0,2	.,.	3,0	0,4	1,2	.,.	0,1	1,6	.,.	3,0	2,2	2,1	3,1
Unigene0005930	1506	1506	A	G	SNP	.	7788.78	1|1	0|1	1|1	1|1	1|1	0|1	1|1	1|1	1|1	0|1	1|1	1|1	0|1	0|1	0|1	0|1	0|1	0|1	0|1	0,10	8,11	0,17	0,15	0,16	3,8	0,21	0,23	0,9	3,16	0,11	0,11	1,7	11,18	1,5	1,2	4,10	3,4	6,5
Unigene0005935	721	721	C	T	SNP	.	56650.6	1|1	1|1	1|1	0|1	1|1	0|1	0|1	0|1	0|1	0|1	1|1	1|1	0|1	0|1	1|1	0|1	1|1	0|1	1|1	0,82	0,164	1,77	63,90	0,44	21,68	30,75	11,57	29,69	54101	0,72	0,39	19,61	45125	0,135	22,33	0,74	12,22	0,111
Unigene0005936	415	415	A	C	SNP	.	2341.06	1|1	1|1	0|0	0|1	1|1	0|0	0|1	0|0	0|1	0|0	.|.	0|1	1|1	0|1	0|0	1|1	1|1	0|0	0|1	0,5	0,2	1,0	4,8	0,2	1,0	4,6	5,0	3,6	22,1	.,.	1,7	0,4	2,4	3,0	0,1	0,7	1,0	4,15
Unigene0005947	263	263	A	G	SNP	.	3758.54	0|1	1|1	1|1	1|1	1|1	1|1	1|1	1|1	0|1	0|1	0|1	1|1	0|1	1|1	0|1	1|1	1|1	1|1	0|1	3,3	0,8	0,6	1,14	0,2	0,11	0,4	0,3	2,4	4,1	1,3	0,2	2,3	0,10	7,8	0,1	1,6	0,3	4,11
Unigene0005953	700	700	A	G	SNP	.	928.58	0|0	1|1	1|1	0|1	1|1	1|1	1|1	0|0	0|1	0|0	0|1	1|1	0|0	1|1	1|1	1|1	1|1	0|1	.|.	18,1	0,1	0,2	6,1	0,1	0,3	0,3	9,0	2,1	18,1	10,2	0,1	40,1	0,2	0,2	0,5	0,2	8,1	.,.
Unigene0005955	47	47	A	G	SNP	.	6071.39	0|1	0|1	1|1	1|1	1|1	0|1	1|1	0|1	.|.	0|1	1|1	1|1	1|1	1|1	0|1	0|1	0|1	0|0	0|1	13,8	21,26	0,1	0,12	0,2	1,8	0,7	2,11	.,.	2,20	0,6	0,8	0,3	0,17	12,4	2,3	5,3	2,0	23,23
Unigene0005958	81	81	T	-	Deletion	.	1532.1	1|1	0|1	0|1	1|1	1|1	1|1	0|0	1|1	.|.	0|1	0|0	1|1	0|1	1|1	0|1	.|.	0|1	0|1	.|.	0,3	2,4	6,4	0,2	0,8	0,3	1,0	0,4	.,.	4,2	2,0	0,8	1,2	0,3	1,1	.,.	1,3	1,1	.,.
Unigene0005966	156	156	A	G	SNP	.	10586.1	0|1	1|1	0|1	0|1	1|1	1|1	0|1	1|1	0|1	1|1	0|1	1|1	1|1	0|1	1|1	0|1	0|1	1|1	0|1	8,31	0,16	3,3	6,29	0,9	0,27	15,15	0,30	4,25	0,12	3,4	1,16	0,9	25,10	0,10	6,8	6,14	0,3	10,26
Unigene0005973	270	270	C	T	SNP	.	39627.6	1|1	0|1	1|1	1|1	1|1	0|1	1|1	1|1	0|1	0|1	0|1	1|1	0|1	1|1	0|1	0|1	0|1	0|1	0|1	0,71	33110	0,23	0,105	0,23	16,45	0,49	0,48	17,62	8,24	14,41	0,12	12,27	0,121	27,65	14,16	8,58	16,27	18101
Unigene0005978	264	264	A	G	SNP	.	35978.4	1|1	0|1	0|1	0|1	0|1	1|1	0|1	1|1	1|1	1|1	0|1	0|1	0|1	0|1	0|1	0|1	0|1	1|1	0|1	0,66	17,97	4,31	16,74	4,32	0,59	13,54	0,51	4,50	0,68	9,53	10,29	14,46	16,54	34,47	11,42	7,50	0,26	9,50
Unigene0005981	252	252	C	T	SNP	.	843.14	1|1	1|1	.|.	0|1	1|1	1|1	0|1	1|1	0|0	1|1	.|.	0|1	0|0	0|1	1|1	.|.	0|1	1|1	1|1	0,2	0,1	.,.	3,3	0,1	0,1	14,2	0,4	8,0	0,1	.,.	1,1	8,0	2,3	0,2	.,.	1,1	0,2	0,1
Unigene0005984	269	269	A	G	SNP	.	2410.45	1|1	1|1	0|1	0|1	1|1	0|1	1|1	0|1	0|1	0|1	0|1	1|1	1|1	1|1	0|1	1|1	0|1	0|1	0|1	0,4	0,8	1,1	5,2	0,1	4,1	0,3	8,2	0,12	5,6	1,2	0,3	0,7	0,6	5,2	0,2	1,2	2,2	5,3
Unigene0005985	990	990	G	T	SNP	.	637.57	0|0	1|1	.|.	0|0	.|.	.|.	1|1	0|0	0|1	0|0	0|1	1|1	1|1	0|0	0|1	1|1	.|.	.|.	1|1	1,0	0,1	.,.	14,1	.,.	.,.	0,2	1,0	3,4	2,0	3,1	0,3	0,2	14,0	3,5	0,1	.,.	.,.	0,1
Unigene0005988	276	276	A	G	SNP	.	4311.61	1|1	0|1	0|1	0|1	1|1	0|0	1|1	1|1	0|1	0|1	0|1	1|1	1|1	0|1	0|1	0|1	0|1	1|1	0|1	0,8	20,2	3,2	22,29	0,13	20,0	0,2	0,7	12,7	2,2	8,1	0,7	0,8	10,26	12,1	1,2	21,4	0,1	16,3
Unigene0006000	474	474	A	G	SNP	.	755.51	0|0	1|1	1|1	0|1	1|1	.|.	1|1	0|0	0|1	0|0	1|1	1|1	1|1	0|1	.|.	0|0	0|1	1|1	0|0	1,0	0,2	0,2	2,3	0,1	.,.	0,4	5,0	14,2	4,0	0,1	0,1	0,2	1,1	.,.	1,0	4,2	0,2	3,0
Unigene0006000	775	775	A	C	SNP	.	1545.63	0|1	1|1	1|1	1|1	1|1	0|1	0|1	1|1	0|0	0|1	1|1	1|1	1|1	1|1	.|.	1|1	0|1	.|.	0|1	1,2	0,5	0,1	0,3	0,2	1,3	1,4	0,2	3,0	2,2	0,1	0,4	0,2	0,6	.,.	0,2	6,2	.,.	3,2
Unigene0006000	831	831	T	C	SNP	.	2273.42	0|1	0|1	0|1	0|1	0|0	0|1	0|1	0|1	1|1	1|1	0|1	0|0	1|1	0|1	.|.	1|1	1|1	.|.	1|1	2,2	2,1	1,2	1,1	3,0	1,4	6,1	2,3	0,9	0,5	1,3	3,0	0,2	6,1	.,.	0,1	0,13	.,.	0,7
Unigene0006000	840	840	C	A	SNP	.	2192.05	0|1	0|1	0|1	0|0	0|1	0|1	0|1	0|1	1|1	1|1	0|1	0|0	1|1	0|1	.|.	1|1	1|1	.|.	1|1	2,3	2,1	1,2	1,0	3,1	1,4	6,1	2,3	0,8	0,5	1,3	3,0	0,1	5,1	.,.	0,1	0,13	.,.	0,8
Unigene0006000	1762	1762	C	G	SNP	.	2274.45	1|1	0|1	0|1	1|1	0|1	1|1	0|0	1|1	1|1	1|1	0|1	0|0	0|1	0|1	1|1	0|0	0|1	0|0	0|1	0,1	4,1	4,5	0,6	4,1	0,2	3,0	0,2	0,12	0,1	1,1	5,0	2,2	2,4	0,3	1,0	2,13	3,0	2,7
Unigene0006001	56	56	G	A	SNP	.	2078.98	1|1	1|1	0|1	1|1	1|1	0|1	1|1	1|1	1|1	.|.	1|1	1|1	1|1	0|1	.|.	1|1	0|0	1|1	0|1	0,1	0,5	3,6	0,8	0,1	2,5	0,1	0,1	0,11	.,.	0,2	0,1	0,1	2,6	.,.	0,1	7,0	0,1	8,4
Unigene0006001	2113	2113	A	G	SNP	.	14754.3	1|1	0|1	1|1	1|1	1|1	1|1	0|1	1|1	0|1	1|1	1|1	1|1	0|1	1|1	0|1	0|1	0|1	1|1	0|1	0,19	8,9	0,40	0,44	0,9	0,16	4,20	0,2	10,45	0,4	0,12	0,7	3,13	0,72	6,14	2,10	11,36	0,10	11,35
Unigene0006006	137	137	T	C	SNP	.	1896.7	1|1	0|1	0|1	0|1	0|1	.|.	1|1	1|1	1|1	0|1	0|1	1|1	1|1	0|1	1|1	1|1	0|1	1|1	0|1	0,1	4,2	1,3	3,4	2,3	.,.	0,4	0,1	0,5	2,3	3,4	0,1	0,4	1,6	0,5	0,4	1,2	0,2	4,1
Unigene0006010	34	34	T	C	SNP	.	1105.95	0|1	0|1	0|1	0|1	0|1	1|1	0|0	1|1	.|.	.|.	1|1	0|0	1|1	0|1	1|1	1|1	0|1	0|0	0|1	1,1	3,4	2,3	2,3	1,1	0,1	4,0	0,1	.,.	.,.	0,1	2,0	0,1	5,6	0,1	0,1	2,4	1,0	3,3
Unigene0006027	837	837	T	G	SNP	.	1612.7	1|1	0|1	1|1	0|1	0|1	1|1	0|1	1|1	0|0	0|1	0|0	1|1	0|1	0|1	0|0	0|1	0|1	1|1	0|1	0,3	4,8	0,3	4,5	3,2	0,2	1,6	0,3	5,0	3,3	9,0	0,1	4,2	1,3	4,0	4,1	4,3	0,5	7,3
Unigene0006027	1206	1206	G	T	SNP	.	2295.5	1|1	0|1	0|1	0|1	1|1	0|1	0|1	1|1	0|1	0|1	0|1	1|1	0|1	1|1	0|1	0|1	0|0	1|1	0|1	0,2	30,4	6,1	9,4	0,13	2,1	14,5	0,5	27,6	9,6	6,2	0,1	7,3	0,7	10,9	8,6	13,0	0,2	9,1
Unigene0006028	829	829	G	A	SNP	.	1608.52	0|0	0|1	1|1	0|1	1|1	1|1	0|1	0|0	0|1	0|1	1|1	1|1	0|1	0|1	.|.	1|1	0|1	0|1	0|0	7,0	3,6	0,2	3,6	0,2	0,2	3,4	3,0	2,1	2,4	0,4	0,3	4,3	4,3	.,.	0,4	1,1	1,1	2,0
Unigene0006028	1297	1297	C	T	SNP	.	4291.72	0|1	0|1	0|1	1|1	1|1	0|1	1|1	0|0	0|1	0|1	1|1	1|1	1|1	0|1	.|.	0|1	1|1	1|1	0|1	2,3	4,21	3,1	0,17	0,3	4,6	0,11	3,0	6,7	1,3	0,4	0,8	0,5	4,7	.,.	1,6	1,14	0,3	1,4
Unigene0006035	1131	1131	C	T	SNP	.	2641.22	1|1	1|1	0|1	0|1	0|1	0|1	0|1	1|1	1|1	0|1	0|1	0|1	1|1	0|1	0|1	1|1	1|1	.|.	1|1	0,2	0,3	11,7	6,5	15,6	1,1	2,4	0,1	0,4	4,2	2,0	13,5	0,7	3,6	4,1	0,2	0,3	.,.	0,12
Unigene0006041	301	301	A	G	SNP	.	1138.95	0|1	1|1	0|1	1|1	1|1	.|.	0|1	1|1	0|1	0|1	0|0	1|1	1|1	1|1	1|1	0|1	0|1	0|1	.|.	1,1	0,2	2,4	0,2	0,4	.,.	1,1	0,2	1,1	1,1	3,0	0,3	0,2	0,1	0,3	1,2	1,2	2,2	.,.
Unigene0006042	341	341	T	C	SNP	.	3128.99	1|1	0|1	0|1	0|1	1|1	0|1	1|1	1|1	1|1	1|1	1|1	0|1	0|1	0|1	1|1	1|1	1|1	0|1	1|1	0,7	8,10	1,4	3,3	0,4	1,2	0,9	0,1	0,4	0,5	0,5	3,1	2,2	2,1	0,8	0,2	0,5	3,1	0,5
Unigene0006046	932	932	A	G	SNP	.	1290.91	1|1	0|1	.|.	0|1	0|1	0|1	1|1	1|1	0|1	1|1	1|1	0|1	0|0	0|1	.|.	.|.	0|1	1|1	.|.	0,5	2,1	.,.	1,6	2,1	2,2	0,4	0,6	4,2	0,2	0,2	1,1	1,0	3,2	.,.	.,.	6,2	0,1	.,.
Unigene0006047	290	290	A	C	SNP	.	2241.72	0|1	1|1	0|1	1|1	1|1	0|1	0|1	0|1	0|1	1|1	1|1	.|.	0|1	0|1	1|1	.|.	0|0	0|1	0|1	7,2	0,9	1,2	0,1	0,2	3,4	3,6	11,5	5,4	0,1	0,13	.,.	4,4	1,3	0,7	.,.	1,0	2,2	2,4
Unigene0006051	509	509	A	C	SNP	.	18643.4	1|1	0|1	0|1	1|1	0|1	0|1	1|1	1|1	0|1	0|1	0|1	0|1	0|1	0|1	0|1	1|1	1|1	0|1	1|1	0,28	15,60	8,12	0,32	8,25	22,3	0,63	0,39	3,38	14,23	3,1	7,10	7,20	11,32	4,28	0,14	0,31	8,11	0,54
Unigene0006052	411	411	A	C	SNP	.	1129.06	1|1	1|1	0|1	.|.	1|1	1|1	1|1	0|0	1|1	0|1	0|1	.|.	0|1	1|1	0|1	0|1	1|1	1|1	.|.	0,1	0,2	1,3	.,.	0,1	0,2	0,4	1,0	0,2	1,4	1,2	.,.	2,2	0,1	1,2	1,1	0,3	0,2	.,.
Unigene0006054	126	126	A	G	SNP	.	1371.81	1|1	0|1	0|1	1|1	0|1	0|1	1|1	.|.	1|1	0|1	0|1	0|1	1|1	1|1	0|0	.|.	1|1	1|1	.|.	0,5	1,1	2,2	0,2	1,5	1,1	0,7	.,.	0,4	2,3	5,1	1,1	0,2	0,1	6,0	.,.	0,2	0,6	.,.
Unigene0006054	771	771	-	C	Insertion	.	2062.43	1|1	0|1	1|1	1|1	1|1	0|1	1|1	0|1	1|1	0|1	1|1	0|1	1|1	0|1	0|0	1|1	0|1	1|1	1|1	0,17	1,1	0,3	0,9	0,1	3,3	0,2	2,7	0,2	2,1	0,5	2,1	0,1	1,5	1,0	0,2	1,2	0,1	0,1
Unigene0006054	818	818	C	T	SNP	.	721.11	0|0	0|0	0|1	0|1	1|1	1|1	1|1	0|0	1|1	0|0	1|1	1|1	1|1	0|0	.|.	1|1	.|.	0|1	.|.	18,0	1,0	1,1	3,7	0,2	0,1	0,1	4,0	0,1	1,0	0,3	0,1	0,1	5,0	.,.	0,1	.,.	1,1	.,.
Unigene0006057	1093	1093	G	C	SNP	.	3976.18	1|1	0|1	1|1	0|1	0|1	0|0	0|1	1|1	1|1	1|1	0|1	1|1	0|1	0|1	0|0	0|1	0|1	0|1	0|1	0,3	7,11	0,1	3,9	2,8	1,0	5,8	0,14	0,14	0,7	3,1	0,2	1,2	5,4	1,0	4,5	3,11	4,2	2,6
Unigene0006060	301	301	C	G	SNP	.	19123.8	0|1	1|1	0|1	1|1	1|1	1|1	0|1	0|1	1|1	0|1	0|1	1|1	1|1	0|1	1|1	0|1	0|1	1|1	0|1	23,14	0,60	6,9	0,47	0,22	1,20	4,25	2,21	0,34	7,23	5,22	0,24	0,27	8,29	0,19	4,17	5,17	0,10	10,28
Unigene0006064	1348	1348	C	T	SNP	.	1543.21	0|0	0|1	1|1	0|1	0|1	1|1	0|1	1|1	0|1	.|.	1|1	1|1	1|1	0|1	0|1	0|0	0|1	0|1	0|1	14,1	4,5	0,2	3,9	2,1	0,3	3,1	0,5	4,3	.,.	.	0,2	0,1	2,5	3,1	2,0	4,3	2,1	1,1
Unigene0006068	661	661	T	C	SNP	.	11565.2	0|1	0|1	0|1	0|1	0|1	1|1	0|0	1|1	1|1	0|1	0|1	0|1	1|1	1|1	0|1	0|1	0|1	1|1	1|1	1,12	40,19	16,19	3,3	30,7	0,13	61,1	0,56	0,22	26,81	27,16	19,3	0,3	0,10	2,13	4,23	4,2	0,11	0,3
Unigene0006079	211	211	A	C	SNP	.	3480.89	0|1	0|0	.|.	1|1	1|1	1|1	1|1	0|1	0|1	0|1	1|1	1|1	0|1	0|0	0|0	0|0	1|1	0|1	1|1	19,2	24,1	.,.	0,16	0,5	0,24	0,1	11,2	53,5	34,7	0,2	0,2	21,3	9,0	31,0	36,0	0,6	48,17	0,8
Unigene0006079	214	214	T	C	SNP	.	4737.63	1|1	0|0	.|.	1|1	1|1	1|1	1|1	1|1	0|1	0|1	1|1	1|1	0|1	0|0	0|0	0|0	1|1	0|1	1|1	0,19	24,0	.,.	0,13	0,4	0,24	0,1	0,11	53,5	33,6	0,1	0,2	20,3	9,0	34,0	37,0	0,6	47,15	0,7
Unigene0006079	1068	1068	T	G	SNP	.	3845.2	0|1	1|1	.|.	0|1	1|1	0|1	.|.	0|0	1|1	0|1	1|1	1|1	0|0	1|1	0|1	0|1	0|1	0|0	0|1	22,5	0,17	.,.	9,6	0,3	4,1	.,.	25,0	2,24	18,5	0,8	0,1	28,1	0,13	25,13	5,3	4,4	11,0	8,5
Unigene0006092	1846	1846	A	G	SNP	.	14732.1	0|1	0|1	0|1	0|1	0|1	1|1	0|1	0|1	1|1	1|1	0|1	0|1	1|1	0|1	1|1	0|1	1|1	1|1	0|1	12,10	6,44	8,16	21,24	4,23	0,25	19,17	25,18	0,36	0,44	6,13	7,11	0,27	17,19	0,8	2,10	2,36	0,9	7,42
Unigene0006107	259	259	G	C	SNP	.	2238.06	0|1	0|1	1|1	1|1	1|1	0|1	0|1	0|0	1|1	.|.	0|1	1|1	0|1	0|1	0|1	0|1	1|1	0|1	0|1	1,1	5,5	0,5	0,6	0,1	3,1	2,5	4,0	0,5	.,.	1,2	0,3	3,3	4,10	6,4	1,2	0,5	1,1	1,3
Unigene0006107	460	460	A	G	SNP	.	1175.69	1|1	0|1	1|1	0|1	.|.	.|.	0|1	1|1	1|1	1|1	0|1	0|1	0|0	0|1	0|1	0|1	1|1	.|.	1|1	0,2	4,1	0,1	1,6	.,.	.,.	1,5	0,1	0,1	0,1	3,1	1,1	2,0	2,7	3,1	1,1	0,4	.,.	0,1
Unigene0006114	217	217	C	T	SNP	.	9658.26	0|1	1|1	1|1	1|1	1|1	1|1	1|1	0|0	0|1	0|1	1|1	1|1	0|1	1|1	0|1	0|1	1|1	0|1	0|1	7,2	0,24	0,19	0,26	0,13	0,9	0,18	15,0	4,19	5,17	0,13	0,8	6,10	0,24	3,18	1,13	1,15	2,6	2,4
Unigene0006114	238	238	A	G	SNP	.	7851.48	0|1	1|1	1|1	1|1	1|1	1|1	1|1	0|0	0|1	0|1	1|1	1|1	0|1	1|1	0|1	0|1	1|1	0|1	0|1	4,4	0,19	0,17	0,22	0,13	0,9	0,15	14,1	2,11	10,4	0,10	0,10	5,9	0,22	3,13	1,11	1,16	1,6	1,4
Unigene0006130	684	684	T	-	Deletion	.	31232	1|1	0|1	1|1	0|1	0|1	1|1	0|1	1|1	1|1	0|1	0|1	0|1	0|1	0|1	1|1	1|1	0|1	0|1	0|1	0,46	10,39	0,35	13,70	10,18	0,49	21,79	0,68	2,61	15,64	6,44	12,22	9,43	25,48	0,80	0,25	9,39	4,27	14,97
Unigene0006132	304	304	C	G	SNP	.	2144.7	1|1	1|1	0|1	0|1	.|.	0|0	1|1	1|1	1|1	0|0	1|1	0|1	1|1	1|1	1|1	1|1	0|1	1|1	0|0	0,7	0,8	1,3	5,9	.,.	1,0	0,6	0,2	0,1	1,0	0,2	2,2	0,1	0,2	0,7	0,1	2,4	0,1	1,0
Unigene0006134	508	508	A	G	SNP	.	2636.45	1|1	1|1	0|1	1|1	1|1	1|1	0|1	1|1	0|0	0|1	1|1	1|1	0|0	1|1	0|1	1|1	0|1	0|1	1|1	0,9	0,7	1,1	0,4	0,1	0,2	5,10	0,3	2,0	4,8	0,5	0,1	2,0	0,4	8,13	0,4	1,2	1,1	0,3
Unigene0006134	577	577	A	G	SNP	.	1240.93	0|1	0|1	1|1	0|0	0|1	0|0	0|1	0|0	1|1	0|1	0|0	1|1	1|1	0|1	0|1	0|1	1|1	1|1	0|1	5,2	13,2	0,1	4,0	2,1	1,0	8,6	5,0	0,2	5,3	4,0	0,1	0,1	9,1	5,13	3,2	0,1	0,1	3,6
Unigene0006149	312	312	A	C	SNP	.	2325.73	1|1	1|1	0|1	1|1	1|1	0|1	0|1	0|1	1|1	1|1	1|1	0|1	0|1	1|1	0|1	0|1	0|1	0|0	0|1	0,7	0,5	2,2	0,1	0,2	3,3	1,8	3,3	0,8	0,2	0,5	2,6	2,3	0,3	2,1	3,3	3,1	1,0	3,5
Unigene0006157	224	224	A	C	SNP	.	3166.3	1|1	0|1	0|1	0|1	1|1	1|1	0|1	1|1	0|0	1|1	0|1	1|1	0|1	0|1	0|1	1|1	0|1	0|0	0|1	0,9	5,11	1,10	4,8	0,3	0,7	1,10	0,2	3,0	0,2	1,2	0,3	2,3	4,4	12,9	0,2	2,5	1,0	1,5
Unigene0006157	526	526	C	T	SNP	.	1017.35	0|0	0|1	1|1	0|1	0|0	1|1	0|1	0|1	1|1	0|0	1|1	0|0	1|1	0|1	1|1	.|.	0|1	1|1	0|0	6,0	2,2	0,3	3,4	2,0	0,1	2,2	1,1	0,3	1,0	0,5	1,0	0,6	4,1	0,2	.,.	10,2	0,1	3,0
Unigene0006157	647	647	C	T	SNP	.	2429.19	1|1	0|1	0|1	1|1	0|1	0|1	0|1	0|1	1|1	0|1	0|1	1|1	0|1	1|1	0|1	.|.	0|1	.|.	1|1	0,9	4,4	5,2	0,6	1,2	2,2	1,5	1,2	0,4	3,4	2,3	0,3	2,5	0,3	2,5	.,.	6,8	.,.	0,1
Unigene0006158	42	42	G	C	SNP	.	857.37	1|1	0|1	1|1	0|1	0|1	0|1	.|.	1|1	0|1	.|.	1|1	0|1	1|1	0|1	.|.	0|0	1|1	0|0	0|1	0,5	3,1	0,1	5,2	5,3	2,1	.,.	0,1	1,3	.,.	0,3	3,2	0,1	5,1	.,.	2,0	0,1	1,0	7,3
Unigene0006158	529	529	G	A	SNP	.	5277.07	0|1	0|1	1|1	0|1	1|1	0|1	1|1	0|1	0|1	1|1	0|0	1|1	0|1	1|1	0|1	1|1	0|1	0|1	0|1	3,11	2,7	0,4	1,13	0,11	1,3	0,5	1,7	5,5	0,6	1,0	0,14	9,1	0,9	1,3	0,1	2,5	1,5	22,19
Unigene0006158	532	532	G	T	SNP	.	5085.22	0|1	0|1	1|1	0|1	1|1	0|1	1|1	0|1	0|1	1|1	0|0	1|1	0|1	1|1	0|1	1|1	0|1	0|1	0|1	4,11	2,7	0,4	1,12	0,10	1,3	0,4	1,7	5,5	0,6	1,0	0,14	9,1	0,8	1,3	0,1	2,5	1,5	22,19
Unigene0006165	293	293	T	C	SNP	.	1390.9	1|1	0|0	.|.	0|1	1|1	.|.	1|1	1|1	0|0	1|1	.|.	1|1	1|1	1|1	.|.	.|.	0|1	1|1	0|1	0,4	3,0	.,.	7,6	0,2	.,.	0,4	0,1	4,0	0,3	.,.	0,3	0,3	0,4	.,.	.,.	1,5	0,1	3,1
Unigene0006172	1058	1058	T	-	Deletion	.	2122.27	0|0	1|1	0|1	0|1	1|1	0|1	0|1	0|0	1|1	1|1	1|1	1|1	0|1	0|1	0|1	0|0	1|1	0|0	1|1	4,0	0,7	2,3	1,4	0,2	1,1	2,5	1,0	0,3	0,4	0,10	0,3	1,9	12,3	3,6	1,0	0,2	1,0	0,5
Unigene0006191	1019	1019	C	T	SNP	.	2409.92	1|1	0|1	0|1	0|1	0|0	0|1	0|1	1|1	.|.	1|1	1|1	0|1	1|1	0|1	0|1	0|0	0|0	1|1	0|1	0,6	2,7	1,1	2,1	6,0	4,2	7,3	0,16	.,.	0,2	0,3	5,2	0,5	4,3	3,4	3,0	4,0	0,7	9,1
Unigene0006191	1039	1039	A	C	SNP	.	1767.61	1|1	0|1	0|1	1|1	0|0	0|1	1|1	1|1	.|.	1|1	1|1	0|1	1|1	1|1	0|1	.|.	0|0	1|1	0|0	0,2	1,7	1,0	0,1	1,0	1,2	0,1	0,9	.,.	0,2	0,1	3,1	0,3	0,2	1,4	.,.	2,0	0,7	2,0
Unigene0006196	250	250	G	A	SNP	.	1441.1	0|1	0|1	1|1	0|1	0|0	0|0	1|1	0|1	1|1	1|1	1|1	1|1	1|1	0|1	0|0	1|1	0|1	1|1	1|1	2,2	10,8	0,1	4,6	3,0	1,0	0,2	1,1	0,6	0,1	0,4	0,1	0,2	1,2	1,0	0,1	1,1	0,1	0,3
Unigene0006199	988	988	C	T	SNP	.	2943.77	1|1	0|1	1|1	0|1	1|1	1|1	0|1	1|1	1|1	0|1	.|.	1|1	0|1	0|1	1|1	0|1	1|1	.|.	0|1	0,4	4,11	0,1	3,9	0,4	0,1	1,4	0,3	0,5	2,3	.,.	0,3	2,4	3,14	0,2	1,3	0,5	.,.	1,5
Unigene0006206	904	904	A	G	SNP	.	9517.76	0|1	0|1	0|1	1|1	0|1	0|1	0|1	0|1	1|1	0|1	1|1	0|1	1|1	1|1	1|1	1|1	0|1	1|1	0|1	4,1	13,24	2,1	0,17	1,3	4,8	5,26	1,3	0,7	5,45	0,21	3,6	0,11	0,35	0,19	0,13	1,6	0,6	4,14
Unigene0006217	499	499	A	G	SNP	.	4260.19	1|1	1|1	0|1	0|1	1|1	1|1	0|1	0|1	0|1	0|1	1|1	1|1	0|1	0|1	0|1	1|1	0|1	0|1	0|1	0,4	0,4	2,5	3,14	0,5	0,2	2,14	6,2	11,4	6,16	0,2	0,4	5,5	8,11	1,2	0,5	6,3	1,4	26,12
Unigene0006217	687	687	G	A	SNP	.	9841	1|1	1|1	0|1	1|1	1|1	1|1	0|1	0|1	0|1	0|1	1|1	1|1	0|1	0|1	0|1	1|1	0|1	1|1	0|1	0,10	0,22	1,9	2,22	0,8	0,12	5,13	1,13	4,8	6,6	0,20	0,9	4,8	4,20	3,8	0,14	4,11	0,9	18,23
Unigene0006233	481	481	A	G	SNP	.	863.6	1|1	1|1	0|1	0|0	1|1	1|1	0|1	.|.	0|1	1|1	0|0	0|0	1|1	0|1	1|1	.|.	0|0	.|.	0|1	0,6	0,1	1,3	8,0	0,1	0,1	4,1	.,.	6,1	0,1	4,0	3,0	0,4	5,4	0,2	.,.	5,0	.,.	1,2
Unigene0006236	474	474	C	T	SNP	.	22322.5	1|1	0|1	0|1	0|1	0|1	1|1	0|1	1|1	1|1	1|1	1|1	0|1	1|1	0|1	1|1	1|1	0|1	1|1	1|1	0,65	10,71	6,29	9,36	6,23	0,22	7,20	0,25	0,31	0,52	2,43	6,35	3,51	10,36	4,48	0,7	6,34	0,7	0,26
Unigene0006243	283	283	A	T	SNP	.	29747.1	1|1	1|1	0|1	0|1	0|1	1|1	0|1	0|1	0|1	0|1	0|1	0|1	1|1	1|1	0|1	0|1	0|1	1|1	0|1	3,42	0,144	3,20	37,24	6,10	2,46	12,51	12,46	6,28	14,51	12,60	13,18	1,36	7,94	6,51	23,36	16,34	0,17	25,43
Unigene0006245	461	461	C	T	SNP	.	3984.04	1|1	0|1	0|1	0|1	0|1	1|1	1|1	1|1	1|1	1|1	1|1	0|1	1|1	1|1	0|1	1|1	1|1	1|1	1|1	0,7	7,3	1,5	1,12	1,2	0,5	0,8	0,4	0,6	0,4	0,8	1,2	0,11	0,10	1,9	0,6	0,3	0,1	0,8
Unigene0006248	664	664	A	G	SNP	.	1366.49	0|1	0|1	0|1	0|1	.|.	1|1	0|1	0|1	0|1	1|1	1|1	1|1	0|0	0|0	1|1	1|1	0|1	.|.	0|1	1,2	2,4	1,3	3,1	.,.	0,3	1,2	3,1	5,2	0,3	0,3	0,1	3,0	5,0	0,6	0,2	1,5	.,.	1,2
Unigene0006257	128	128	A	C	SNP	.	961.57	0|0	.|.	0|0	.|.	.|.	.|.	1|1	0|1	0|1	.|.	1|1	1|1	1|1	1|1	.|.	1|1	1|1	.|.	.|.	14,1	.,.	1,0	.,.	.,.	.,.	0,1	5,7	1,3	.,.	0,5	0,1	0,1	0,6	.,.	0,1	0,4	.,.	.,.
Unigene0006257	775	775	C	T	SNP	.	5385.03	1|1	0|1	0|1	0|1	0|1	1|1	0|1	1|1	1|1	0|1	0|1	0|1	1|1	0|1	1|1	0|1	1|1	1|1	1|1	0,4	12,9	1,9	5,5	2,8	0,6	5,12	0,11	0,17	2,8	4,6	3,8	0,9	2,8	0,7	1,7	0,11	0,2	0,2
Unigene0006279	481	481	C	G	SNP	.	1647.81	1|1	.|.	0|1	0|1	1|1	1|1	0|1	0|1	0|1	1|1	1|1	1|1	0|0	1|1	1|1	1|1	0|1	0|0	.|.	0,4	.,.	2,3	4,7	0,5	0,4	2,2	1,4	1,6	0,2	0,1	0,2	2,0	0,3	0,2	0,3	4,2	1,0	.,.
Unigene0006281	243	243	C	T	SNP	.	1817.73	0|1	0|1	1|1	0|1	1|1	0|0	1|1	0|1	1|1	0|1	1|1	.|.	0|1	0|1	0|1	.|.	.|.	1|1	0|1	2,4	5,5	0,1	10,3	0,1	3,0	0,4	1,4	0,2	1,1	0,3	.,.	2,4	1,7	2,4	.,.	.,.	0,3	3,3
Unigene0006281	712	712	C	G	SNP	.	2136.61	1|1	0|1	.|.	1|1	1|1	1|1	0|1	0|0	0|1	1|1	1|1	.|.	0|1	1|1	1|1	1|1	.|.	1|1	1|1	0,3	1,4	.,.	0,4	0,1	0,4	1,2	1,0	2,4	0,4	0,14	.,.	2,2	0,3	0,2	0,1	.,.	0,5	0,6
Unigene0006285	2622	2622	A	G	SNP	.	4265.65	0|1	1|1	0|1	0|1	0|1	0|1	0|1	0|1	1|1	0|1	0|1	0|1	0|1	0|1	.|.	1|1	1|1	1|1	1|1	8,4	0,18	5,5	1,8	3,1	3,8	4,9	5,7	0,14	2,3	1,4	1,2	3,3	1,5	.,.	0,5	0,14	0,1	0,10
Unigene0006293	112	112	C	T	SNP	.	849.94	1|1	0|1	0|1	0|1	0|1	.|.	0|1	1|1	.|.	0|1	1|1	0|0	1|1	0|1	0|1	0|1	1|1	1|1	1|1	0,1	4,6	2,1	3,1	2,1	.,.	3,1	0,3	.,.	1,3	0,2	1,0	0,2	2,2	1,2	2,1	0,1	0,1	0,1
Unigene0006301	440	440	C	T	SNP	.	3413.33	0|1	.|.	1|1	0|1	1|1	1|1	0|1	0|1	1|1	1|1	0|0	1|1	1|1	0|1	1|1	1|1	0|1	1|1	1|1	10,5	.,.	0,8	3,11	0,2	0,12	1,5	6,3	0,2	0,1	4,0	0,3	0,7	3,14	0,6	0,2	3,8	0,3	0,4
Unigene0006310	453	453	T	C	SNP	.	1173.12	1|1	.|.	.|.	0|0	0|0	.|.	0|0	1|1	0|0	.|.	.|.	0|0	.|.	0|0	1|1	0|1	1|1	1|1	1|1	0,2	.,.	.,.	4,0	4,0	.,.	4,0	0,17	4,0	.,.	.,.	7,0	.,.	1,0	0,2	5,2	0,2	0,6	0,2
Unigene0006310	539	539	A	T	SNP	.	2540.56	1|1	1|1	0|0	0|1	0|0	.|.	0|1	1|1	0|1	.|.	1|1	0|0	0|0	0|1	1|1	0|1	1|1	0|1	1|1	0,6	0,1	1,0	13,4	26,0	.,.	26,2	0,26	9,6	.,.	0,1	18,0	1,0	2,3	0,1	8,3	0,6	1,3	0,6
Unigene0006316	484	484	C	G	SNP	.	6991.76	1|1	0|1	0|1	0|1	1|1	0|1	0|1	1|1	0|1	0|1	0|1	1|1	0|1	0|1	1|1	1|1	1|1	1|1	1|1	0,19	1,9	1,7	14,9	0,5	2,8	4,9	0,14	4,8	2,3	2,9	0,7	3,6	13,8	0,7	0,8	0,27	0,1	0,25
Unigene0006316	902	902	A	C	SNP	.	3112.01	0|1	0|1	0|1	0|1	1|1	0|1	1|1	0|0	0|1	0|1	0|1	1|1	1|1	0|1	1|1	0|1	0|1	1|1	0|1	9,1	7,2	8,4	14,4	0,6	3,5	0,10	19,0	5,5	6,2	4,4	0,4	0,3	8,4	0,6	1,2	2,15	0,2	8,7
Unigene0006316	1012	1012	T	A	SNP	.	2768.32	1|1	0|1	0|1	0|1	0|0	.|.	0|0	0|1	1|1	0|1	0|0	0|0	.|.	0|1	1|1	1|1	1|1	1|1	1|1	0,16	3,3	5,1	8,6	4,0	.,.	2,0	4,12	0,3	3,11	2,0	4,0	.,.	7,7	0,1	0,1	0,7	0,1	0,6
Unigene0006317	1168	1168	G	A	SNP	.	2324.37	1|1	0|1	0|1	1|1	1|1	0|1	1|1	1|1	0|1	0|0	0|1	1|1	0|0	1|1	0|0	0|0	0|1	1|1	0|1	0,1	13,4	12,3	0,3	0,2	6,4	0,3	0,7	7,7	3,0	11,2	0,2	9,0	0,5	5,0	6,0	11,3	0,1	6,8
Unigene0006317	1174	1174	G	A	SNP	.	2404.7	1|1	0|1	0|1	1|1	1|1	0|1	1|1	1|1	0|1	0|0	0|1	1|1	0|0	1|1	0|0	0|0	0|1	1|1	0|1	0,1	14,4	11,4	0,4	0,2	5,4	0,3	0,9	10,7	4,0	10,2	0,3	9,0	0,6	6,0	6,0	10,4	0,2	6,8
Unigene0006330	958	958	A	G	SNP	.	12097.8	1|1	0|1	1|1	0|1	1|1	1|1	0|1	1|1	1|1	0|1	0|1	1|1	0|1	0|1	0|1	1|1	1|1	0|1	0|1	0,16	28,30	0,14	11,22	1,19	0,14	5,32	0,21	0,23	9,15	3,9	1,14	11,11	12,18	5,11	2,27	2,27	2,7	3,17
Unigene0006331	479	479	A	G	SNP	.	5291.17	1|1	1|1	1|1	0|1	0|1	0|1	0|1	1|1	1|1	0|1	0|1	0|1	0|1	0|1	0|1	0|1	1|1	0|1	1|1	0,16	0,14	0,2	4,11	3,6	4,12	2,13	0,7	0,10	13,9	9,6	3,2	10,4	7,15	6,6	6,6	0,9	1,1	0,6
Unigene0006331	761	761	C	G	SNP	.	6352.5	0|1	1|1	1|1	0|1	0|1	1|1	1|1	0|1	0|1	0|1	0|1	0|1	0|1	0|1	0|1	0|1	1|1	0|1	1|1	6,9	0,13	0,6	6,14	2,15	0,9	0,10	3,12	3,18	8,12	20,2	2,4	6,7	24,10	10,25	3,8	0,4	9,3	0,12
Unigene0006331	776	776	T	C	SNP	.	6344.98	1|1	1|1	1|1	0|1	0|1	1|1	1|1	1|1	0|1	0|1	0|1	0|1	0|1	0|1	0|1	0|1	1|1	0|1	1|1	0,15	0,12	0,5	5,12	2,13	0,8	0,8	0,14	4,14	7,13	17,2	2,4	6,8	23,9	11,23	4,7	0,4	9,2	0,12
Unigene0006359	356	356	C	A	SNP	.	1167.41	1|1	.|.	0|0	1|1	.|.	0|1	1|1	1|1	0|1	0|1	1|1	1|1	.|.	0|1	0|0	.|.	0|1	0|1	0|1	0,1	.,.	4,0	0,1	.,.	4,2	0,3	0,2	5,3	3,3	0,3	0,3	.,.	3,4	4,0	.,.	4,1	1,2	3,1
Unigene0006359	377	377	G	A	SNP	.	1966.86	1|1	1|1	0|1	1|1	.|.	0|1	1|1	1|1	0|1	0|1	1|1	1|1	1|1	0|1	0|1	1|1	0|1	0|1	0|1	0,3	0,3	4,2	0,3	.,.	4,3	0,3	0,3	5,4	3,5	0,2	0,2	0,3	2,6	5,1	0,2	5,3	1,2	2,3
Unigene0006359	1643	1643	A	T	SNP	.	3428.21	1|1	0|1	1|1	0|1	1|1	0|0	1|1	1|1	0|1	0|1	0|1	1|1	1|1	0|1	0|1	1|1	0|1	0|1	1|1	0,8	3,8	0,6	2,8	0,3	4,0	0,9	0,7	5,2	5,1	3,7	0,6	0,2	4,8	1,1	0,3	9,3	2,1	0,3
Unigene0006359	1697	1697	C	T	SNP	.	5369.11	1|1	0|1	1|1	0|1	0|1	1|1	0|1	1|1	1|1	0|1	0|1	0|1	1|1	1|1	0|1	0|1	0|1	0|1	0|1	0,7	5,12	0,4	1,10	2,2	0,6	4,4	0,7	0,15	1,5	5,8	4,4	0,10	0,17	1,1	1,2	4,18	2,5	1,5
Unigene0006361	2838	2838	A	G	SNP	.	7990.05	1|1	0|1	1|1	1|1	1|1	0|1	1|1	1|1	0|1	0|1	1|1	0|1	0|1	0|1	0|1	0|1	1|1	0|1	1|1	0,16	3,13	0,19	0,17	0,11	9,6	0,23	0,3	5,16	4,11	0,15	2,5	7,2	6,11	3,5	2,11	0,15	2,7	0,18
Unigene0006362	323	323	A	G	SNP	.	3431.83	1|1	0|1	0|1	0|0	1|1	0|1	0|1	1|1	0|1	1|1	0|0	0|1	1|1	0|1	1|1	0|1	0|0	0|1	.|.	0,16	3,9	1,6	3,0	1,4	1,4	6,2	0,18	4,7	0,6	1,0	1,6	0,7	3,1	0,5	3,3	2,0	1,3	.,.
Unigene0006362	2107	2107	C	T	SNP	.	5245.56	1|1	1|1	0|1	0|1	1|1	0|1	1|1	1|1	0|1	0|1	0|1	0|1	1|1	1|1	1|1	1|1	0|1	0|1	0|1	0,15	0,15	2,4	1,8	0,1	1,5	0,13	0,17	1,11	4,4	4,9	1,3	0,10	1,16	0,5	0,2	3,3	1,3	1,2
Unigene0006368	42	42	A	G	SNP	.	377.87	1|1	1|1	0|0	0|1	.|.	0|0	.|.	.|.	1|1	0|0	.|.	0|0	1|1	1|1	1|1	0|0	0|1	.|.	.|.	0,2	0,1	2,0	4,1	.,.	2,0	.,.	.,.	0,1	2,0	.,.	2,0	0,1	0,1	0,2	1,0	2,2	.,.	.,.
Unigene0006368	2261	2261	A	G	SNP	.	2381.95	1|1	0|1	0|1	0|1	.|.	0|1	0|1	1|1	0|1	.|.	1|1	1|1	0|0	0|1	.|.	0|1	1|1	1|1	0|1	0,12	1,3	1,10	2,3	.,.	1,4	2,4	0,5	6,1	.,.	0,2	0,1	1,0	1,6	.,.	1,1	0,5	0,2	4,5
Unigene0006372	163	163	-	AG	Insertion	.	632.75	1|1	1|1	0|0	0|1	1|1	0|0	0|1	1|1	0|1	0|0	.|.	1|1	0|0	0|0	0|1	1|1	0|0	.|.	0|0	0,1	0,1	2,0	2,2	0,2	2,0	1,5	1,2	5,1	2,0	.,.	0,2	7,0	2,0	8,2	0,3	1,0	.,.	1,0
Unigene0006375	955	955	G	A	SNP	.	12080.6	1|1	0|1	0|1	0|1	0|1	0|1	1|1	1|1	0|1	0|1	1|1	0|1	1|1	0|1	0|1	1|1	1|1	1|1	1|1	0,24	21,17	17,13	17,8	12,8	23,6	0,17	0,19	15,10	14,27	0,28	13,10	0,37	9,8	17,6	0,14	0,33	0,13	0,34
[truncated: 5,687 more rows]

## Sheet: southern highbush blueberry
SNPs loci identified from leaf transcriptome of southern highbush blueberry
[truncated: 4,862 more rows]

## Sheet: northern highbush blueberry
SNPs loci identified from leaf transcriptome of northern highbush blueberry
[truncated: 13,064 more rows]
[truncated: 2 more columns]
